# Supplementary material for: Total synthesis of (−)-flueggenine A and (−)-15′-epi-flueggenine D
Source: Royal Society of Chemistry journal article supplement (doi:10.1039/d4sc07525k), 2024-12-12

## Total Synthesis of (-)-Flueggeinine A and (-)-15'-*epi*-Flueggeinine D

Seung Mo Seo,<sup>a</sup> Dongwook Kim,<sup>a,b</sup> Taewan Kim,<sup>a</sup> and Sunkyu Han<sup>\*a,b</sup>

<sup>a</sup>Department of Chemistry, Korea Advanced Institute of Science & Technology (KAIST), Daejeon 34141, Republic of Korea.

<sup>b</sup>Center for Catalytic Hydrocarbon Functionalizations, Institute for Basic Science (IBS), Daejeon 34141, Republic of Korea.

\*Email: [sunkyu.han@kaist.ac.kr](mailto:sunkyu.han@kaist.ac.kr)

### Supplementary Information

|                                                                                                                           |     |
|---------------------------------------------------------------------------------------------------------------------------|-----|
| <u>1. General Information</u>                                                                                             | S02 |
| <u>2. Experimental Procedures and Physical Data for Synthesized Compounds</u>                                             | S03 |
| <u>3. Comparison of Spectroscopic Data of Natural and Synthetic Flueggeinine A</u>                                        | S21 |
| <u>4. Single Crystal X-Ray Diffraction Analysis of Compounds <b>20</b>, <b>23</b>, <b>28</b>, <b>32</b>, and <b>7</b></u> | S23 |
| <u>4.1. X-ray Crystal Structure of <b>20</b></u>                                                                          | S23 |
| <u>4.2. X-ray Crystal Structure of <b>23</b></u>                                                                          | S38 |
| <u>4.3. X-ray Crystal Structure of <b>28</b></u>                                                                          | S50 |
| <u>4.4. X-ray Crystal Structure of <b>32</b></u>                                                                          | S62 |
| <u>4.5. X-ray Crystal Structure of <b>7</b></u>                                                                           | S74 |
| <u>5. Computational Details on the Conformation of Enone <b>20</b></u>                                                    | S87 |
| <u>6. Attempted Optimization of Reductive Heck Reaction Between <b>22</b> and <b>28</b></u>                               | S91 |
| <u>7. Supplemental References</u>                                                                                         | S92 |
| <u>8. Copies of NMR Spectra of Synthesized Compounds</u>                                                                  | S94 |

## 1. General Information

All reactions were performed in oven-dried or flame-dried round-bottomed flasks and vials. Unless otherwise noted, the flasks were fitted with rubber septa and reactions were conducted under a positive pressure of argon, and vials were tightly sealed with plastic septa, Teflon tape, and parafilm. Stainless steel syringes were used to transfer air- and moisture-sensitive liquids. Flash column chromatography was performed as described by Still et al. using silica gel (60-Å pore size, 40–63  $\mu\text{m}$ , 4-6%  $\text{H}_2\text{O}$  content, Merck).<sup>1</sup> Analytical thin-layer chromatography (TLC) was performed using glass plates pre-coated with 0.25 mm silica gel impregnated with a fluorescent indicator (254 nm). Thin layer chromatography plates were visualized by exposure to ultraviolet light, an aqueous ammonium cerium nitrate/ammonium molybdate (Seebach's staining),<sup>2</sup> and/or a basic aqueous potassium permanganate ( $\text{KMnO}_4$ ).

Unless otherwise stated, all commercial reagents and solvents were used without additional purification with the following exceptions as indicated below. Dichloromethane and tetrahydrofuran were purchased from Merck and Daejung Inc., respectively and were purified by the method of Grubbs et al. under positive argon pressure.<sup>3</sup>

$^1\text{H}$  and  $^{13}\text{C}$  nuclear magnetic resonance spectra were recorded with Bruker Avance NEO (500 MHz) and calibrated by using the residual undeuterated chloroform ( $\delta_{\text{H}} = 7.24$  ppm) and  $\text{CDCl}_3$  ( $\delta_{\text{C}} = 77.2$  ppm) or undeuterated  $\text{CD}_3\text{OD}$  ( $\delta_{\text{H}} = 3.31$  ppm) and  $\text{CD}_3\text{OD}$  ( $\delta_{\text{C}} = 49.2$  ppm) as internal references. Data are reported in the following manners: chemical shift in ppm [multiplicity (s = singlet, d = doublet, t = triplet, q = quartet, p = quintet, m = multiplet, app = apparent, br = broad), coupling constant(s) in Hertz, integration]. High resolution mass spectra were obtained from KAIST Analysis Center for Research (Daejeon) by using ESI method. Specific rotation  $[\alpha]_D^T$  was obtained by JASCO P-2000 polarimeter.

All DFT calculations were conducted by Gaussian 09 package.<sup>4</sup> Molecular geometries were optimized using B3LYP<sup>5</sup> functional with Grimme's D3 dispersion correction<sup>6</sup> and 6-31G\* basis set. Single point energies were calculated with B3LYP-D3 functional and 6-311+G\*\* basis set, including solvation effect under SMD<sup>7</sup> solvation model with the dielectric constant of  $\epsilon = 4.7113$  for chloroform. Frequency calculations were carried out at the same level of geometry optimization to confirm the stationary points as local minima (no imaginary and to obtain thermal corrections to the Gibbs free energies at 298.15 K unless otherwise stated.

## 2. Experimental Procedures and Physical Data for Synthesized Compounds

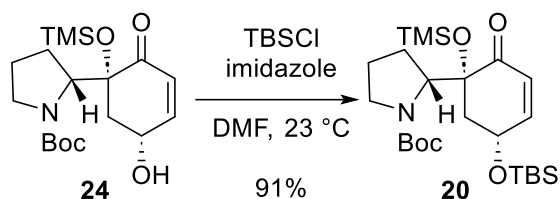

### **(+)-Enone 20:**

Imidazole (785 mg, 11.5 mmol, 6.0 equiv.) and *tert*-butyldimethylchlorosilane (869 mg, 5.77 mmol, 3.0 equiv.) were added to a stirred solution of **24**<sup>8</sup> (710.3 mg, 1.92 mmol, 1.0 equiv.) in dimethylformamide (19 mL) at 23 °C. After 2.5 h, saturated aqueous ammonium chloride solution (100 mL) was added to the mixture and the resultant mixture was extracted with ethyl acetate (3 × 20 mL). The combined organic layers were washed with water (3 × 100 mL) followed by brine (100 mL), dried over anhydrous sodium sulfate, filtered, and concentrated. The resulting crude residue was purified by flash column chromatography (silica gel: diam. 3 cm, ht. 10 cm; eluent: ethyl acetate : hexanes = 1 : 20) to afford **20** (845 mg, 91%) as a white crystalline solid.

**<sup>1</sup>H NMR** (500 MHz, CDCl<sub>3</sub>): δ 6.69 (dt, *J* = 10.4, 2.0 Hz, 1H), 5.88 (dd, *J* = 10.1, 2.3 Hz, 1H), 5.38 (dd, *J* = 9.3, 5.8 Hz, 1H), 4.05 (dd, *J* = 8.5, 2.3 Hz, 1H), 3.59 (td, *J* = 9.6, 5.6 Hz, 1H), 3.20 (ddd, *J* = 10.4, 8.8, 5.9 Hz, 1H), 2.53 (ddd, *J* = 12.7, 5.8, 1.9 Hz, 1H), 1.99 – 1.90 (m, 1H), 1.87 – 1.74 (m, 2H), 1.68 – 1.58 (m, 1H), 1.54 – 1.46 (m, 1H), 1.44 (s, 9H), 0.86 (s, 9H), 0.14 (s, 3H), 0.10 (s, 3H), 0.07 (s, 9H).

**<sup>13</sup>C NMR** (126 MHz, CDCl<sub>3</sub>): δ 200.5, 156.4, 153.8, 127.0, 84.0, 79.6, 67.0, 60.5, 48.2, 45.5, 28.7 (3C), 26.0 (3C), 25.5, 24.8, 18.1, 2.4 (3C), -4.1, -4.6.

**HRMS** (ESI): Calculated for C<sub>24</sub>H<sub>45</sub>NO<sub>5</sub>Si<sub>2</sub> [M+Na]<sup>+</sup>: 506.2729, found: 506.2734.

**TLC** (ethyl acetate : hexanes = 1 : 8) R<sub>f</sub>: 0.58 (UV, KMnO<sub>4</sub>).

**[α]<sub>D</sub><sup>23</sup>**: +67.32 (c 1.0, CH<sub>2</sub>Cl<sub>2</sub>);

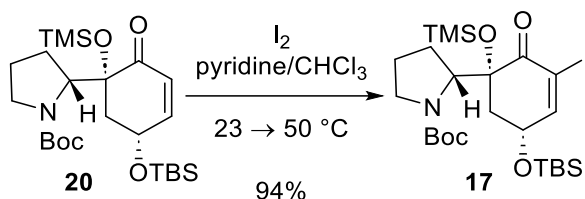

**(+)- $\alpha$ -Iodoenone (17):**

Iodine (2.54 g, 10.0 mmol, 3.0 equiv.) was added to a stirred solution of **20** (1.62 g, 3.34 mmol, 1 equiv.) in anhydrous chloroform (17 mL) and pyridine (17 mL) co-solvent at 23 °C. The reaction temperature was raised to 50 °C. After 3.5 h, saturated aqueous sodium thiosulfate solution (100 mL) was added to the mixture and the resultant mixture was extracted with ethyl acetate (3  $\times$  20 mL). The combined organic layers were dried over anhydrous sodium sulfate, filtered, and concentrated. The resulting residue was purified by flash column chromatography (silica gel: diam. 4 cm, ht. 12 cm; eluent: ethyl acetate : hexanes = 1 : 15) to afford **17** (1.95 g, 96%) as a pale yellow oil.

**$^1\text{H NMR}$**  (500 MHz,  $\text{CDCl}_3$ ):  $\delta$  7.43 (s, 1H), 5.38 (ddd,  $J = 9.2, 6.1, 2.6$  Hz, 1H), 4.05 (dd,  $J = 8.5, 2.4$  Hz, 1H), 3.61 (td,  $J = 9.5, 5.6$  Hz, 1H), 3.19 (ddd,  $J = 10.5, 8.6, 6.0$  Hz, 1H), 2.60 (ddd,  $J = 12.8, 5.9, 1.7$  Hz, 1H), 1.99 – 1.89 (m, 1H), 1.86 (dd,  $J = 12.7, 8.9$  Hz, 1H), 1.76 (tt,  $J = 9.1, 4.1$  Hz, 1H), 1.69 – 1.59 (m, 1H), 1.58 – 1.48 (m, 1H), 1.45 (s, 9H), 0.88 (s, 9H), 0.16 (s, 3H), 0.11 (s, 3H), 0.09 (s, 9H).

**$^{13}\text{C NMR}$**  (126 MHz,  $\text{CDCl}_3$ ):  $\delta$  195.0, 162.2, 156.4, 101.0, 83.2, 79.9, 68.8, 60.6, 48.2, 45.3, 28.7 (3C), 26.0 (3C), 25.8, 24.8, 18.1, 2.3 (3C), -4.1, -4.6.

**HRMS** (ESI): Calculated for  $\text{C}_{24}\text{H}_{44}\text{INO}_5\text{Si}_2$   $[\text{M}+\text{H}]^+$ : 610.1876, found: 610.1879.

**TLC** (ethyl acetate : hexanes = 1 : 15)  $R_f$ : 0.44 (UV,  $\text{KMnO}_4$ ).

**$[\alpha]_D^{23}$** : +35.43 (c 1.0,  $\text{CH}_2\text{Cl}_2$ );

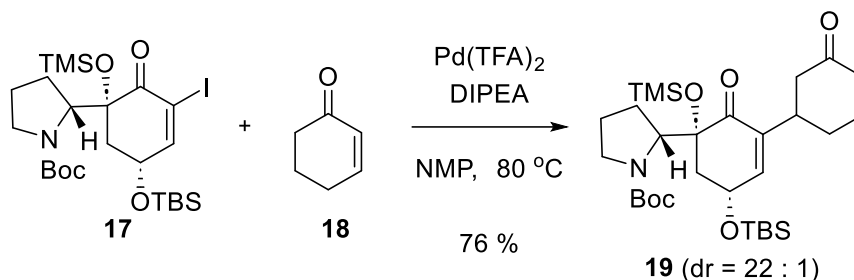

### **(+)-Cyclohexanone 19:**

Compound **19** was synthesized following a modified protocol of the procedure described in a previous report.<sup>9</sup>

*N,N*-diisopropylethyl amine (0.13 mL, 0.744 mmol, 6.0 equiv.) and Pd(TFA)<sub>2</sub> as a 0.2 M stock solution in *N*-Methyl-2-pyrrolidone (40 μL, 6.20 μmol, 5.0 mol%) were added to a stirred solution of cyclohexenone **18** (12 μL, 0.124 mmol, 1.0 equiv.) and iodide **17** (153 mg, 0.251 mmol, 2.0 equiv.) in *N*-Methyl-2-pyrrolidone (0.11 mL) at 23 °C. The reaction temperature was raised to 80 °C. After 24 h, saturated aqueous ammonium chloride solution (10 mL) was added to the mixture and the resultant mixture was extracted with ethyl acetate (3 × 10 mL). The combined organic layers were washed with water (3 × 30 mL) followed by brine (30 mL), dried over anhydrous sodium sulfate, filtered, and concentrated. The resulting crude residue was purified by flash column chromatography (silica gel: diam. 2 cm, ht. 14 cm; eluent: ethyl acetate : hexanes = 1 : 15) to afford **19** (54 mg, 76%) as a white foam.

**<sup>1</sup>H NMR** (500 MHz, CDCl<sub>3</sub>): δ 6.40 (s, 1H), 5.38 (t, *J* = 7.8 Hz, 1H), 4.01 (dd, *J* = 8.5, 2.4 Hz, 1H), 3.60 (td, *J* = 9.6, 5.3 Hz, 1H), 3.20 (ddd, *J* = 10.6, 8.8, 6.2 Hz, 1H), 2.89 (tt, *J* = 12.2, 3.7 Hz, 1H), 2.54 (dd, *J* = 12.7, 5.9 Hz, 1H), 2.38 (d, *J* = 14.0 Hz, 1H), 2.32 (ddd, *J* = 14.0, 4.2, 2.0 Hz, 1H), 2.25 (td, *J* = 13.6, 6.3 Hz, 1H), 2.17 (t, *J* = 13.4 Hz, 1H), 2.08 (ddq, *J* = 12.4, 5.9, 3.1 Hz, 1H), 1.98 – 1.91 (m, 1H), 1.91 – 1.85 (m, 1H), 1.77 (dd, *J* = 12.6, 9.1 Hz, 1H), 1.73 – 1.56 (m, 4H), 1.48 – 1.43 (m, 1H) 1.45 (s, 9H), 0.88 (s, 9H), 0.15 (s, 3H), 0.11 (s, 3H), 0.08 (s, 9H).

**<sup>13</sup>C NMR** (126 MHz, CDCl<sub>3</sub>): δ 210.5, 200.2, 156.5, 147.0, 139.6, 84.6, 79.7, 66.2, 60.4, 48.1, 46.8, 45.3, 41.3, 38.0, 29.8, 28.7 (3C), 26.1 (3C), 25.4, 25.2, 24.8, 18.2, 2.5 (3C), -4.0, -4.5.

**HRMS** (ESI): Calculated for C<sub>30</sub>H<sub>53</sub>NO<sub>6</sub>Si<sub>2</sub> [M+Na]<sup>+</sup>: 602.3304, found: 602.3307.

**TLC** (ethyl acetate : hexanes = 1 : 5) R<sub>f</sub>: 0.46 (UV, KMnO<sub>4</sub>).

**[α]<sub>D</sub><sup>23</sup>**: +54.60 (c 1.0, CH<sub>2</sub>Cl<sub>2</sub>);

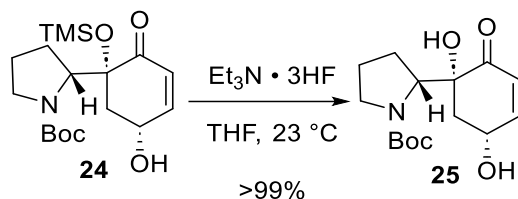

**(+)-Diol 25:**

*Compound 25 was synthesized via a modified procedure of our previous report.*<sup>8</sup>

To a stirred solution of **24**<sup>8</sup> (702 mg, 1.90 mmol, 1.0 equiv.) in THF (19 mL) at  $23\text{ }^\circ\text{C}$  was added triethylamine trihydrofluoride (9.30 mL, 57.0 mmol, 30.0 equiv.) under argon. After 3 h, saturated aqueous sodium bicarbonate solution (250 mL) was added to the reaction mixture, and the layers were separated. The aqueous layer was extracted with ethyl acetate ( $3 \times 30\text{ mL}$ ), and the combined organic layers were dried over anhydrous sodium sulfate and concentrated under reduced pressure. The resulting crude residue was purified by flash column chromatography (silica gel: diam. 3 cm, ht. 16 cm; eluent: ethyl acetate : hexanes = 1 : 1) to afford **25** (565 mg,  $>99\%$ ) as a colorless oil.

*The spectral data matches those of our previous report.*<sup>8</sup>

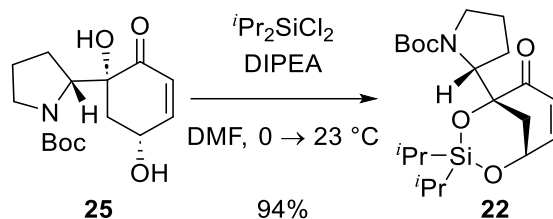

**(+)-Tethered enone 22:**

*N,N*-diisopropylethyl amine (1.45 mL, 8.32 mmol, 5.0 equiv.) were added to a stirred solution of **25** (495 mg, 1.66 mmol, 1.0 equiv.) in dimethylformamide (33 mL) at 0 °C. Dichlorodiisopropylsilane (0.60 mL, 3.33 mmol, 2.0 equiv.) was added to the reaction mixture dropwise over 10 min at 0 °C. At the same temperature, the reaction mixture was stirred for 10 min and ice-water bath was then removed. The reaction mixture was further stirred 23 °C. After 17 h, saturated aqueous ammonium chloride solution (150 mL) was added to the mixture and the resultant mixture was extracted with ethyl acetate (3 × 30 mL). The combined organic layers were washed with water (3 × 100 mL) followed by brine (100 mL), dried over anhydrous sodium sulfate, filtered, and concentrated. The resulting crude residue was purified by flash column chromatography (silica gel: diam. 3 cm, ht. 12 cm; eluent: ethyl acetate : hexanes = 1 : 5) to afford **22** (643 mg, 94%) as a pale yellow oil.

**<sup>1</sup>H NMR** (500 MHz, CDCl<sub>3</sub>): δ 6.96 (dd, *J* = 10.3, 5.5 Hz, 1H), 5.94 (d, *J* = 10.0 Hz, 1H), 4.55 (s, 1H), 4.12 (dd, *J* = 8.6, 2.7 Hz, 1H), 3.64 – 3.36 (br, 1H), 3.24 (ddd, *J* = 10.6, 8.3, 4.3 Hz, 1H), 2.43 (d, *J* = 15.3 Hz, 1H), 2.38 – 2.14 (m, 2H), 2.06 (dq, *J* = 12.9, 8.7 Hz, 1H), 1.92 (dp, *J* = 10.9, 8.2 Hz, 1H), 1.77 – 1.68 (m, 1H), 1.41 (s, 9H), 1.01 (dd, *J* = 7.5, 4.5 Hz, 6H), 0.94 – 0.86 (m, 8H).

**<sup>13</sup>C NMR** (126 MHz, CDCl<sub>3</sub>): δ 196.7, 156.4, 146.1, 128.2, 79.4, 78.4, 64.0, 61.0, 48.2, 38.9, 28.6 (3C), 28.1, 25.0, 17.2, 16.9, 16.8, 16.6, 14.4, 14.0.

**HRMS** (ESI): Calculated for C<sub>21</sub>H<sub>35</sub>NO<sub>5</sub>Si [M+Na]<sup>+</sup>: 432.2177, found: 432.2181.

**TLC** (ethyl acetate : hexanes = 1 : 5) R<sub>f</sub>: 0.44 (UV, KMnO<sub>4</sub>).

**[α]<sub>D</sub><sup>23</sup>**: +215.55 (c 1.0, CH<sub>2</sub>Cl<sub>2</sub>);

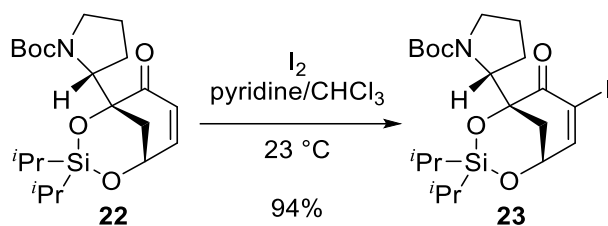

**(+)- $\alpha$ -Iodo-tethered-enone 23:**

Iodine (100 mg, 0.397 mmol, 3.0 equiv.) was added to a stirred solution of **22** (54 mg, 0.132 mmol, 1 equiv.) in anhydrous chloroform (0.66 mL) and pyridine (0.66 mL) co-solvent at 23 °C. After 2.5 h, saturated aqueous sodium thiosulfate solution (20 mL) was added to the mixture and the resultant mixture was extracted with ethyl acetate (3  $\times$  10 mL). The combined organic layers were dried over anhydrous sodium sulfate, filtered, and concentrated. The resulting residue was purified by flash column chromatography (silica gel: diam. 2 cm, ht. 14 cm; eluent: ethyl acetate : hexanes = 1 : 15) to afford **23** (61 mg, 85%) as a white crystalline solid.

**$^1\text{H NMR}$**  (500 MHz,  $\text{CDCl}_3$ ):  $\delta$  7.71 (d,  $J = 5.9$  Hz, 1H), 4.45 (dt,  $J = 6.2, 2.9$  Hz, 1H), 4.15 (dd,  $J = 8.7, 2.8$  Hz, 1H), 3.46 (brs, 1H), 3.24 (ddd,  $J = 10.8, 8.2, 4.4$  Hz, 1H), 2.48 (d,  $J = 15.3$  Hz, 1H), 2.39 (brs, 1H), 2.22 (ddt,  $J = 11.1, 7.3, 3.5$  Hz, 1H), 2.09 (dq,  $J = 13.2, 8.7$  Hz, 1H), 1.96 – 1.85 (m, 1H), 1.73 (dtt,  $J = 12.2, 8.2, 4.2$  Hz, 1H), 1.42 (s, 9H), 1.01 (dd,  $J = 7.3, 4.5$  Hz, 6H), 0.95 – 0.88 (m, 8H).

**$^{13}\text{C NMR}$**  (126 MHz,  $\text{CDCl}_3$ ):  $\delta$  190.4, 156.5, 155.0, 106.3, 79.7, 78.9, 66.8, 61.7, 48.3, 39.1, 28.6 (3C), 28.2, 25.0, 17.2, 17.0, 16.8, 16.6, 14.4, 14.0.

**HRMS** (ESI): Calculated for  $\text{C}_{21}\text{H}_{34}\text{INO}_5\text{Si}$  [ $\text{M}+\text{H}$ ] $^+$ : 536.1324, found: 536.1328.

**TLC** (ethyl acetate : hexanes = 1 : 6)  $R_f$ : 0.49 (UV,  $\text{KMnO}_4$ ).

$[\alpha]_D^{23}$ : +119.52 (c 1.0,  $\text{CH}_2\text{Cl}_2$ );



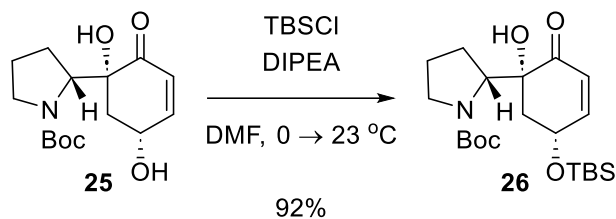

**(+)-Enone 26:**

*N,N*-diisopropylethyl amine (7.35 mL, 42.2 mmol, 10.0 equiv.) and *tert*-butyldimethylchlorosilane (2.55 g, 16.9 mmol, 4.0 equiv.) were added to a stirred solution of **25** (1.26 g, 4.22 mmol, 1.0 equiv.) in dimethylformamide (42 mL) at 0 °C. At the same temperature, the reaction mixture was stirred for 10 min and ice-water bath was then removed. The reaction mixture was further stirred 23 °C. After 2 hours, saturated aqueous ammonium chloride solution (150 mL) was added to the mixture and the resultant mixture was extracted with ethyl acetate (3 × 30 mL). The combined organic layers were washed with water (3 × 100 mL) followed by brine (100 mL), dried over anhydrous sodium sulfate, filtered, and concentrated. The resulting crude residue was purified by flash column chromatography (silica gel: diam. 4 cm, ht. 25 cm; eluent: ethyl acetate : hexanes = 1 : 15) to afford **26** (1.60 g, 92%) as a white solid.

**<sup>1</sup>H NMR** (500 MHz, CDCl<sub>3</sub>): δ 6.79 (d, *J* = 9.8 Hz, 1H), 6.01 (dd, *J* = 10.2, 2.2 Hz, 1H), 5.43 – 5.28 (m, 1H), 4.07 (dd, *J* = 7.7, 3.6 Hz, 1H), 3.77 (s, 1H), 3.58 (ddd, *J* = 10.9, 8.2, 6.1 Hz, 1H), 3.29 (ddd, *J* = 10.8, 8.4, 5.6 Hz, 1H), 2.75 – 2.60z (m, 1H), 1.92 (dtd, *J* = 16.2, 8.2, 6.1 Hz, 1H), 1.75 (dd, *J* = 13.0, 9.1 Hz, 1H), 1.71 – 1.54 (m, 3H), 1.43 (s, 9H), 0.85 (s, 9H), 0.14 (s, 3H), 0.10 (s, 3H).

**<sup>13</sup>C NMR** (126 MHz, CDCl<sub>3</sub>): δ 202.0, 156.5, 155.9, 125.5, 80.3, 79.8, 66.5, 60.0, 48.2, 44.3, 28.7 (3C), 25.9 (3C), 25.6, 25.0, 18.1, -4.1, -4.7.

**HRMS** (ESI): Calculated for C<sub>21</sub>H<sub>37</sub>NO<sub>5</sub>Si [M+Na]<sup>+</sup>: 434.2334, found: 434.2339.

**TLC** (ethyl acetate : hexanes = 1 : 6) R<sub>f</sub>: 0.46 (UV, KMnO<sub>4</sub>).

**[α]<sub>D</sub><sup>23</sup>**: +81.98 (c 1.0, CH<sub>2</sub>Cl<sub>2</sub>);

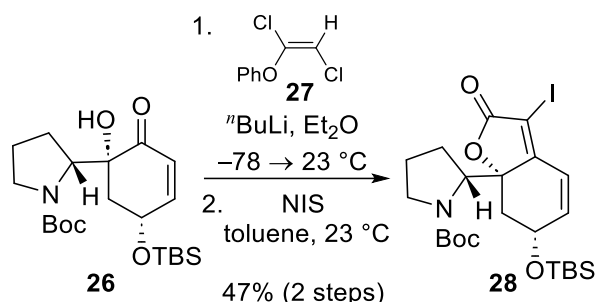

### (+)- $\alpha$ -Iodobutenolide **28**:

$n\text{-BuLi}$  (2.5 M in hexane, 4.0 mL, 9.97 mmol, 4.6 equiv.) was added to a stirred solution of 1,2-dichlorovinyl ether<sup>10</sup> **27** (983 mg, 5.20 mmol, 2.4 equiv.) in anhydrous diethyl ether (10 mL) at  $-78 \text{ }^\circ\text{C}$  under an atmosphere of argon. After 10 min, the resulting mixture was warmed to  $-20 \text{ }^\circ\text{C}$ . After 2 h, the reaction mixture was cooled to  $-78 \text{ }^\circ\text{C}$  and a solution of **26** (892 mg, 2.17 mmol, 1 equiv.) in anhydrous diethyl ether (23 mL) was added. The resulting mixture was slowly warmed to  $23 \text{ }^\circ\text{C}$ . After 1 h, saturated sodium bicarbonate solution (30 mL) was added to the mixture and the resultant mixture was extracted with ethyl acetate ( $3 \times 20 \text{ mL}$ ). The combined organic layers were dried over anhydrous sodium sulfate, filtered, and concentrated.

The resulting crude residue was dissolved in anhydrous toluene (22 mL). *N*-iodosuccinimide (1.46 g, 6.50 mmol, 3.0 equiv.) was added at  $23 \text{ }^\circ\text{C}$  while stirring. After 1.5 h, saturated aqueous sodium thiosulfate solution (50 mL) was added to the mixture and the resultant mixture was extracted with ethyl acetate ( $3 \times 20 \text{ mL}$ ). The combined organic layers were dried over anhydrous sodium sulfate, filtered, and concentrated. The resulting residue was purified by flash column chromatography (silica gel, dry loading: diam. 4 cm, ht. 23 cm; eluent: ethyl acetate : hexanes = 1 : 20) to afford **28** as a white solid (571 mg, 47%, 2 steps).

**$^1\text{H NMR}$**  (500 MHz,  $\text{CDCl}_3$ ):  $\delta$  6.31 (dd,  $J = 9.9, 2.1 \text{ Hz}$ , 1H), 6.24 (dd,  $J = 9.9, 2.4 \text{ Hz}$ , 1H), 5.33 (dt,  $J = 8.0, 3.3 \text{ Hz}$ , 1H), 4.12 (dd,  $J = 8.5, 2.1 \text{ Hz}$ , 1H), 3.58 (ddd,  $J = 11.0, 8.6, 6.6 \text{ Hz}$ , 1H), 3.36 (ddd,  $J = 11.0, 8.8, 5.1 \text{ Hz}$ , 1H), 2.79 (dd,  $J = 12.2, 6.1 \text{ Hz}$ , 1H), 1.90 – 1.80 (m, 1H), 1.77 – 1.67 (m, 1H), 1.63 – 1.54 (m, 2H), 1.46 (s, 9H), 1.35 – 1.27 (m, 1H), 0.86 (s, 9H), 0.15 (s, 3H), 0.10 (s, 3H).

**$^{13}\text{C NMR}$**  (126 MHz,  $\text{CDCl}_3$ ):  $\delta$  169.6, 167.7, 156.5, 145.4, 120.4, 92.8, 80.3, 78.3, 67.5, 59.5, 47.6, 41.9, 28.7 (3C), 26.0 (3C), 25.3, 24.9, 18.1, -4.2, -4.7.

**HRMS** (ESI): Calculated for  $\text{C}_{23}\text{H}_{36}\text{INO}_5\text{Si}$   $[\text{M}+\text{Na}]^+$ : 584.1300, found: 584.1305.

**TLC** (ethyl acetate : hexanes = 1 : 5)  $R_f$ : 0.54 (UV,  $\text{KMnO}_4$ ).

$[\alpha]_D^{23}$ : +19.65 (c 1.0,  $\text{CH}_2\text{Cl}_2$ );

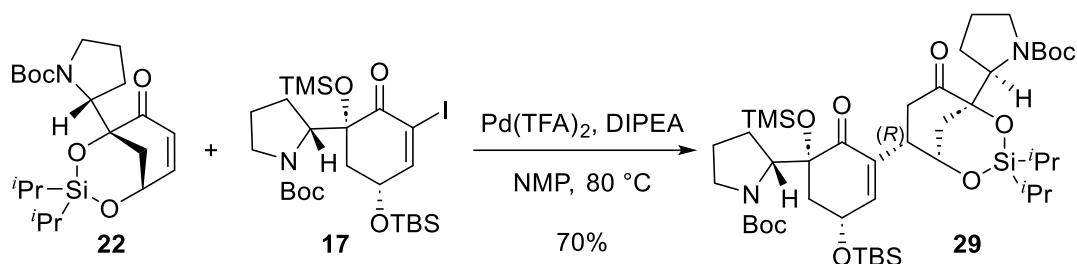

### **(+)-Diketo-dimer 29:**

Compound **29** was synthesized following a modified protocol of the procedure described in a previous report.<sup>9</sup>

*N,N*-diisopropylethyl amine (0.50 mL, 2.89 mmol, 6.0 equiv.) and Pd(TFA)<sub>2</sub> as a 0.2 M stock solution in *N*-Methyl-2-pyrrolidone (0.12 mL, 2.41 × 10<sup>-2</sup> mmol, 5.0 mol%) were added to a stirred solution of enone **22** (198 mg, 0.482 mmol, 1.0 equiv.) and iodide **17** (588 mg, 0.964 mmol, 2.0 equiv.) in *N*-Methyl-2-pyrrolidone (0.44 mL) at 23 °C. The reaction temperature was raised to 80 °C. After 24 h, saturated aqueous ammonium chloride solution (20 mL) was added to the mixture and the resultant mixture was extracted with ethyl acetate (3 × 20 mL). The combined organic layers were washed with water (3 × 30 mL) followed by brine (30 mL), dried over anhydrous sodium sulfate, filtered, and concentrated. The resulting crude residue was purified by flash column chromatography (silica gel: diam. 3 cm, ht. 12 cm; eluent: ethyl acetate : hexanes = 1 : 20) to afford **29** (302 mg, 70%) as a white foam.

**<sup>1</sup>H NMR** (500 MHz, CDCl<sub>3</sub>): δ 6.56 (s, 1H), 5.42 (t, *J* = 7.5 Hz, 1H), 4.15 (d, *J* = 8.0 Hz, 1H), 4.03 (s, 1H), 3.92 (brs, 1H), 3.73 (brs, 1H), 3.64 – 3.37 (br, 1H), 3.58 (brs, 1H), 3.44 (dd, *J* = 14.9, 8.0 Hz, 1H), 3.22 (ddd, *J* = 11.7, 7.9, 4.1 Hz, 1H), 3.16 (q, *J* = 8.6 Hz, 1H), 2.55 (brs, 1H), 2.34 (d, *J* = 14.7 Hz, 1H), 2.25 (d, *J* = 15.4 Hz, 1H), 2.07 – 1.82 (m, 5H), 1.80 – 1.54 (m, 5H), 1.43 (s, 9H), 1.35 (s, 10H), 1.06 – 1.00 (m, 13H), 0.97 – 0.92 (m, 1H), 0.89 (s, 9H), 0.17 (s, 3H), 0.11 (s, 3H), 0.08 (s, 9H).

**<sup>13</sup>C NMR** (126 MHz, CDCl<sub>3</sub>): 210.6, 200.0, 156.2, 155.8, 149.6, 137.2, 84.8, 82.5, 81.8, 79.8, 79.4, 69.5, 66.4, 61.0, 60.0, 48.4, 48.0, 45.5, 44.3, 36.9, 36.1, 28.6 (7C), 26.1 (3C), 25.6, 24.9, 24.2, 18.1, 17.4, 17.3, 17.3, 17.3, 15.9, 15.6, 14.2, 2.5 (3C), -4.2, -4.5. (mixture of rotamers)

**HRMS** (ESI): Calculated for C<sub>45</sub>H<sub>80</sub>N<sub>2</sub>O<sub>10</sub>Si<sub>3</sub> [M+H]<sup>+</sup>: 893.5194, found: 893.5208.

**TLC** (ethyl acetate : hexanes = 1 : 8) R<sub>f</sub>: 0.5 (UV, KMnO<sub>4</sub>).

[α]<sub>D</sub><sup>23</sup>: +69.61 (c 1.0, CH<sub>2</sub>Cl<sub>2</sub>);

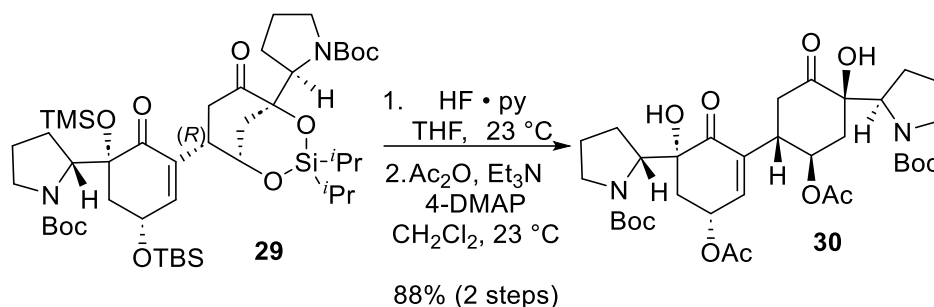

### **(-)-Dihydroxy diacetate 30:**

To a stirred solution of **29** (261 mg, 0.292 mmol, 1 equiv) in THF (4.9 mL) at 23 °C was added hydrogen fluoride pyridine complex (0.39 mL, 4.37 mmol, 15.0 equiv). After 4 h, saturated sodium bicarbonate solution (50 mL) was added to the mixture and the resultant mixture was extracted with ethyl acetate (3 × 20 mL). The combined organic layers were dried over anhydrous sodium sulfate, filtered, and concentrated.

The resulting crude residue was dissolved in anhydrous dichloromethane (2.9 mL) and triethylamine (0.33 mL, 2.36 mmol, 8.1 equiv.), 4-(dimethylamino)pyridine (36 mg, 0.292 mmol, 1.0 equiv.) and acetic anhydride (0.11 mL, 1.17 mmol, 4.0 equiv.) was added at 23 °C. After 1 h, saturated aqueous ammonium chloride solution (50 mL) was added to the mixture and the resultant mixture was extracted with dichloromethane (3 × 20 mL). The combined organic layers were dried over anhydrous sodium sulfate, filtered, and concentrated. The resulting residue was purified by flash column chromatography (silica gel: diam. 3 cm, ht. 18 cm; eluent: ethyl acetate : hexanes = 2 : 3) to afford **30** as a white foam (175 mg, 88%, 2 steps).

**<sup>1</sup>H NMR** (500 MHz, CDCl<sub>3</sub>): δ 6.71 – 6.43 (br, 1H), 6.11 (s, 1H), 5.98 – 5.49 (br, 1H), 4.42 (s, 1H), 4.04 – 3.81 (br, 1H), 3.96 (d, *J* = 7.6 Hz, 1H), 3.90 (brs, 1H), 3.79 – 3.47 (br, 1H), 3.53 (s, 1H), 3.41 (brs, 1H), 3.36 – 3.17 (m, 2H), 2.80 – 2.55 (m, 4H), 2.06 – 1.97 (m, 2H), 2.03 (s, 3H), 1.93 (s, 3H), 1.86 – 1.67 (m, 6H), 1.64 – 1.53 (m, 2H), 1.42 (s, *J* = 2.7 Hz, 18H).

**<sup>13</sup>C NMR** (126 MHz, CDCl<sub>3</sub>): δ 210.6, 200.4, 169.7, 169.5, 156.2, 156.0, 146.3, 136.3, 81.2, 79.9, 79.8, 79.4, 70.0, 67.4, 61.1, 60.7, 48.1, 47.9 (2C), 41.3, 39.0, 38.8, 28.5 (3C), 28.4 (3C), 25.9 (2C), 24.7 (2C), 21.0, 20.9.

**HRMS** (ESI): Calculated for C<sub>34</sub>H<sub>50</sub>N<sub>2</sub>O<sub>12</sub> [M+Na]<sup>+</sup>: 701.3256, found: 701.3265.

**TLC** (ethyl acetate : hexanes = 1 : 1) R<sub>f</sub>: 0.42 (UV, KMnO<sub>4</sub>).

**[α]<sub>D</sub><sup>23</sup>**: -26.55 (c 1.0, CH<sub>2</sub>Cl<sub>2</sub>);

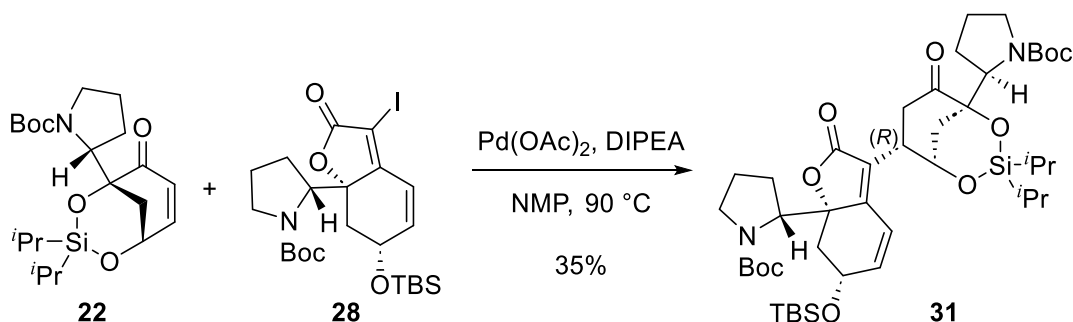

### (+)-Monoketo-dimer 31:

Compound **31** was synthesized following a modified protocol of the procedure described in a previous report.<sup>9</sup>

*N,N*-diisopropylethyl amine (78  $\mu\text{L}$ , 0.448 mmol, 6.0 equiv.) and  $\text{Pd(OAc)}_2$  as a 0.2 M stock solution in *N*-Methyl-2-pyrrolidone (19  $\mu\text{L}$ , 3.73  $\mu\text{mol}$ , 5.0 mol%) were added to a stirred solution of enone **22** (31 mg,  $7.47 \times 10^{-2}$  mmol, 1.0 equiv.) and iodide **28** (126 mg, 0.224 mmol, 3.0 equiv.) in *N*-Methyl-2-pyrrolidone (52  $\mu\text{L}$ ) at 23  $^\circ\text{C}$ . The reaction temperature was raised to 90  $^\circ\text{C}$ . After 48 h, saturated aqueous ammonium chloride solution (10 mL) was added to the mixture and the resultant mixture was extracted with ethyl acetate ( $3 \times 5$  mL). The combined organic layers were washed with water ( $3 \times 10$  mL) followed by brine (10 mL), dried over anhydrous sodium sulfate, filtered, and concentrated. The resulting crude residue was purified by flash column chromatography (silica gel: diam. 3 cm, ht. 19 cm; eluent: ethyl acetate : hexanes = 1 : 15) to afford **31** (22 mg, 35%) as a pale yellow foam.

**$^1\text{H NMR}$**  (500 MHz,  $\text{CDCl}_3$ ):  $\delta$  6.55 (dd,  $J = 10.1, 2.2$  Hz, 1H), 6.15 (d,  $J = 8.9$  Hz, 1H), 5.28 (s, 1H), 4.58 – 4.32 (br 1H), 4.15 (dd,  $J = 8.4, 2.7$  Hz, 1H), 4.06 (dd,  $J = 8.3, 2.5$  Hz, 1H), 3.67 – 3.35 (br, 1H), 3.57 (dd,  $J = 12.8, 6.2$  Hz, 1H), 3.44 (s, 1H), 3.33 – 3.26 (m, 1H), 3.23 (ddd,  $J = 11.6, 7.5, 4.4$  Hz, 1H), 3.10 (brs, 1H), 2.84 (dd,  $J = 12.1, 6.2$  Hz, 1H), 2.68 (brs, 1H), 2.39 (d,  $J = 15.3$  Hz, 1H), 2.31 (brs, 1H), 2.17 (brs, 1H), 1.99 (dq,  $J = 11.7, 8.1, 7.4$  Hz, 1H), 1.91 (dq,  $J = 17.0, 8.1$  Hz, 1H), 1.77 (brs, 1H), 1.73 – 1.70 (m, 1H), 1.69 – 1.61 (brs, 1H), 1.58 – 1.47 (m, 2H), 1.44 (s, 9H), 1.37 (s, 9H), 1.17 (brs, 1H), 1.05 – 0.97 (m, 13H), 0.97 – 0.91 (m, 1H), 0.86 (s, 9H), 0.14 (s, 3H), 0.09 (s, 3H).

**$^{13}\text{C NMR}$**  (126 MHz,  $\text{CDCl}_3$ ):  $\delta$  208.9, 207.4, 172.2, 159.7, 158.4, 156.5, 156.0, 143.8, 123.5, 118.2, 88.7, 80.1, 80.0, 79.4, 70.2, 66.7, 61.5, 59.5, 48.1, 47.6, 42.8, 41.9, 37.3, 36.5, 36.0, 28.6 (3C), 28.6 (3C), 27.8, 26.0 (3C), 25.3, 24.9, 24.3, 18.1, 17.4, 17.3, 17.2, 17.2, 15.4, 14.0, -4.3, -4.6. (mixture of rotamers)

**HRMS** (ESI): Calculated for  $\text{C}_{44}\text{H}_{72}\text{N}_2\text{O}_{10}\text{Si}_2$   $[\text{M}+\text{H}]^+$ : 845.4799, found: 845.4800.

**TLC** (ethyl acetate : hexanes = 1 : 4) *R*<sub>f</sub>: 0.53 (UV,  $\text{KMnO}_4$ ).

**$[\alpha]_D^{23}$** : +38.00 (c 1.0,  $\text{CH}_2\text{Cl}_2$ );

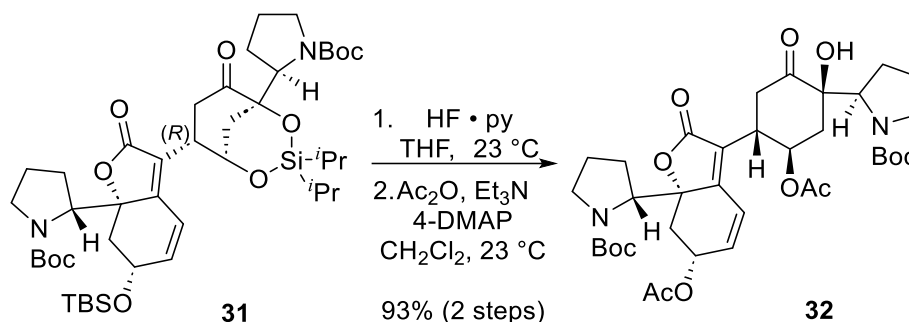

### **(-)-Monohydroxy diacetate 32:**

To a stirred solution of **31** (86 mg, 0.101 mmol, 1 equiv) in THF (1.7 mL) at 23 °C was added hydrogen fluoride pyridine complex (0.14 mL, 1.52 mmol, 15.0 equiv). After 5 h, saturated sodium bicarbonate solution (30 mL) was added to the mixture and the resultant mixture was extracted with ethyl acetate (3 × 10 mL). The combined organic layers were dried over anhydrous sodium sulfate, filtered, and concentrated.

The resulting crude residue was dissolved in anhydrous dichloromethane (1.0 mL) and triethylamine (57  $\mu\text{L}$ , 0.405 mmol, 4.0 equiv.), 4-(dimethylamino)pyridine (12 mg, 0.101 mmol, 1.0 equiv.) and acetic anhydride (19  $\mu\text{L}$ , 0.203 mmol, 2.0 equiv.) was added at 23 °C. After 1 h, saturated aqueous ammonium chloride solution (30 mL) was added to the mixture and the resultant mixture was extracted with dichloromethane (3 × 10 mL). The combined organic layers were dried over anhydrous sodium sulfate, filtered, and concentrated. The resulting residue was purified by flash column chromatography (silica gel: diam. 2 cm, ht. 12 cm; eluent: ethyl acetate : hexanes = 2 : 3) to afford **32** as a white foam (66 mg, 93%, 2 steps).

**<sup>1</sup>H NMR** (500 MHz, CDCl<sub>3</sub>):  $\delta$  6.71 – 6.51 (brs, 1H), 6.09 (dd,  $J$  = 10.3, 2.4 Hz, 1H) 6.18 – 5.98 (br, 1H), 5.96 – 5.46 (br, 1H), 4.41 (dd,  $J$  = 8.3, 2.5 Hz, 1H), 4.03 (d,  $J$  = 8.2 Hz, 1H), 3.94 (brs, 1H, OH), 3.80 – 3.56 (br, 1H), 3.62 (t,  $J$  = 14.1 Hz, 1H), 3.56 – 3.47 (m, 1H), 3.42 – 3.30 (m, 2H), 3.02 (ddd,  $J$  = 14.4, 10.4, 4.4 Hz, 1H), 2.93 (dd,  $J$  = 12.5, 6.5 Hz, 1H), 2.72 (d,  $J$  = 11.4 Hz, 1H), 2.56 (d,  $J$  = 14.4 Hz, 1H), 2.06 – 1.96 (m, 1H), 2.01 (s, 3H), 1.93 – 1.87 (m, 1H), 1.88 (s, 3H), 1.86 – 1.81 (m, 1H), 1.81 – 1.73 (m, 2H), 1.70 – 1.64 (m, 2H), 1.62 – 1.54 (m, 2H), 1.46 – 1.36 (m, 1H), 1.44 (s, 9H), 1.42 (s, 9H).

**<sup>13</sup>C NMR** (126 MHz, CDCl<sub>3</sub>):  $\delta$  210.2, 171.0, 169.8, 169.6, 159.2, 156.1, 136.6, 122.5, 121.1, 87.3, 81.3, 80.2, 69.4, 68.5, 60.7, 60.4, 47.9, 47.5, 41.6, 41.0, 38.7, 36.6, 28.5 (3C), 28.4 (3C), 26.3, 25.6, 24.7 (2C), 21.1, 21.0.

*Note: Two carbons were missing in <sup>13</sup>C NMR. X-ray crystallography assigned the structure.*

**HRMS** (ESI): Calculated for C<sub>36</sub>H<sub>50</sub>N<sub>2</sub>O<sub>12</sub> [M+Na]<sup>+</sup>: 725.3256, found: 725.3265.

**TLC** (ethyl acetate : hexanes = 1 : 1) R<sub>f</sub>: 0.42 (UV, KMnO<sub>4</sub>).

**$[\alpha]_D^{23}$** : -65.28 (c 1.0, CH<sub>2</sub>Cl<sub>2</sub>);

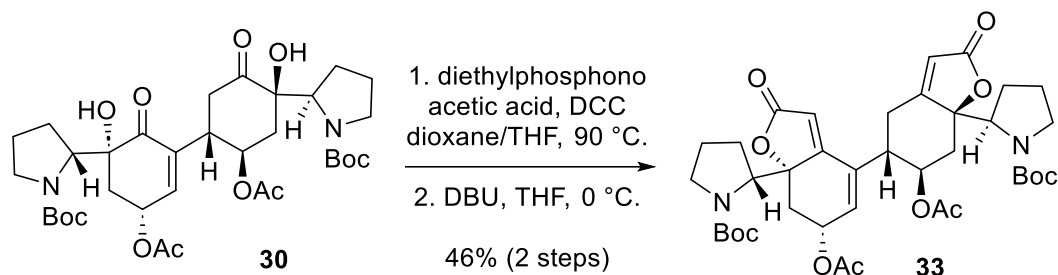

### **(+)-Dibutenolide 33:**

To a stirred solution of **30** (164 mg, 0.241 mmol, 1 equiv.) in dioxane (2.4 mL) at 23 °C was added *N,N'*-dicyclohexylcarbodiimide (1.99 g, 9.65 mmol, 40.0 equiv.) under argon, and the reaction mixture was heated to 90 °C. After 30 min, a solution of diethylphosphonoacetic acid (0.78 mL, 4.82 mmol, 20.0 equiv.) in THF (1.2 mL) was added slowly via syringe pump over 3 h. After 1 h, the reaction mixture was filtered and concentrated under reduced pressure. The resulting crude residue was purified by column chromatography (silica gel: diam. 3 cm, ht. 12 cm; eluent: acetone : hexanes = 1 : 1) to afford an inseparable mixture.

To a stirred solution of the inseparable mixture in THF (2.1 mL) at 0 °C was added 1,8-diazabicyclo[5.4.0]undec-7-ene (0.31 mL, 2.07 mmol, 10 equiv.) under argon. After 3 h, a saturated aqueous ammonium chloride solution (20 mL) was added and the layers were separated. The aqueous layer was extracted with ethyl acetate (3 × 10 mL), and the combined organic layers were dried over anhydrous sodium sulfate and concentrated under reduced pressure. The resulting crude residue was purified by column chromatography (silica gel: diam. 3 cm, ht. 21 cm; eluent: ethyl acetate : hexanes = 1 : 2) to afford **33** (80.4 mg, 46%, 2 steps) as a white foam:

**<sup>1</sup>H NMR** (500 MHz, CDCl<sub>3</sub>): δ 6.37 (s, 1H), 6.21 (s, 1H), 6.02 (s, 1H), 5.92 (s, 1H), 5.77 (s, 1H), 4.32 (d, *J* = 7.6 Hz, 1H), 4.14 (d, *J* = 8.3 Hz, 1H), 3.62 (s, 2H), 3.52 – 3.34 (m, 2H), 3.03 (dd, *J* = 12.9, 7.1 Hz, 1H), 2.86 (dd, *J* = 12.8, 6.5 Hz, 2H), 2.64 (t, *J* = 13.5 Hz, 1H), 2.53 (t, *J* = 10.2 Hz, 1H), 2.13 – 2.01 (m, 1H), 2.04 (s, 3H), 2.01 – 1.93 (m, 1H), 1.97 (s, 3H), 1.92 – 1.84 (m, 2H), 1.82 – 1.75 (m, 1H), 1.71 – 1.59 (m, 3H), 1.55 – 1.41 (m, 2H), 1.50 (s, 9H), 1.49 (s, 9H).

**<sup>13</sup>C NMR** (126 MHz, CDCl<sub>3</sub>): δ 171.8, 171.7, 170.6, 169.6, 168.9, 163.3, 156.4, 156.1, 136.0, 133.0, 116.1, 114.1, 90.6, 89.4, 80.8, 80.3, 69.2, 68.3, 60.4, 59.5, 50.1, 47.6, 47.3, 40.0, 37.4, 28.9, 28.4 (3C), 28.3 (3C), 25.6, 25.3, 24.9, 24.8, 21.0, 20.7.

**HRMS** (ESI): Calculated for C<sub>38</sub>H<sub>50</sub>N<sub>2</sub>O<sub>12</sub> [M+Na]<sup>+</sup>: 749.3256, found: 749.3259.

**TLC** (ethyl acetate : hexanes = 1 : 1) R<sub>f</sub>: 0.40 (UV, KMnO<sub>4</sub>).

[α]<sub>D</sub><sup>23</sup>: +39.66 (c 1.0, CH<sub>2</sub>Cl<sub>2</sub>);

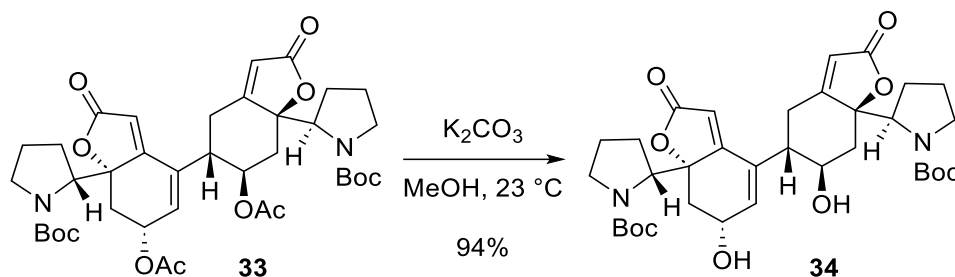

**(+)-Dibutenolide 34:**

Potassium carbonate (45 mg, 0.325 mmol, 3.0 equiv.) was added to a stirred solution of **33** (79 mg, 0.108 mmol, 1 equiv.) in methanol (2.2 mL) at 23 °C. After 1 h, saturated aqueous ammonium chloride solution (20 mL) was added to the mixture and the resultant mixture was extracted with ethyl acetate (3 × 10 mL). The combined organic layers were dried over anhydrous sodium sulfate, filtered, and concentrated. The resulting residue was purified by flash column chromatography (silica gel: diam. 2 cm, ht. 13 cm; eluent: ethyl acetate : hexanes = 2 : 1) to afford **34** as a white solid (65 mg, 94%).

**<sup>1</sup>H NMR** (500 MHz, CDCl<sub>3</sub>): δ 6.42 (d, *J* = 2.4 Hz, 1H), 5.93 (s, 1H), 5.88 (s, 1H), 5.23 (s, 1H), 4.47 – 4.37 (m, 1H), 4.35 (d, *J* = 6.6 Hz, 1H), 4.01 (d, *J* = 7.8 Hz, 1H), 3.59 – 3.48 (m, 2H), 3.46 – 3.34 (m, 2H), 3.09 (dd, *J* = 11.7, 5.7 Hz, 1H), 2.88 (d, *J* = 9.4 Hz, 1H), 2.80 (dd, *J* = 12.8, 4.3 Hz, 1H), 2.53 – 2.38 (m, 2H), 1.96 – 1.84 (m, 1H), 1.80 – 1.68 (m, 3H), 1.64 – 1.50 (m, 3H), 1.49 – 1.40 (m, 2H), 1.42 (s, 9H), 1.40 – 1.32 (m, 1H), 1.36 (s, 9H).

**<sup>13</sup>C NMR** (126 MHz, CDCl<sub>3</sub>): δ 172.2, 172.1, 171.1, 168.1, 157.3, 156.2, 135.9, 135.6, 115.7, 111.5, 91.0, 90.5, 81.3, 80.7, 71.0, 66.2, 58.7, 58.2, 48.8, 47.8, 47.6, 44.7, 42.1, 30.7, 28.6 (3C), 28.5 (3C), 26.5, 25.0, 24.7, 24.3.

**HRMS** (ESI): Calculated for C<sub>34</sub>H<sub>46</sub>N<sub>2</sub>O<sub>10</sub> [M+Na]<sup>+</sup>: 665.3045, found: 665.3044.

**TLC** (ethyl acetate : hexanes = 3 : 1) R<sub>f</sub>: 0.40 (UV, KMnO<sub>4</sub>).

**[α]<sub>D</sub><sup>23</sup>**: +89.05 (c 1.0, CH<sub>2</sub>Cl<sub>2</sub>);



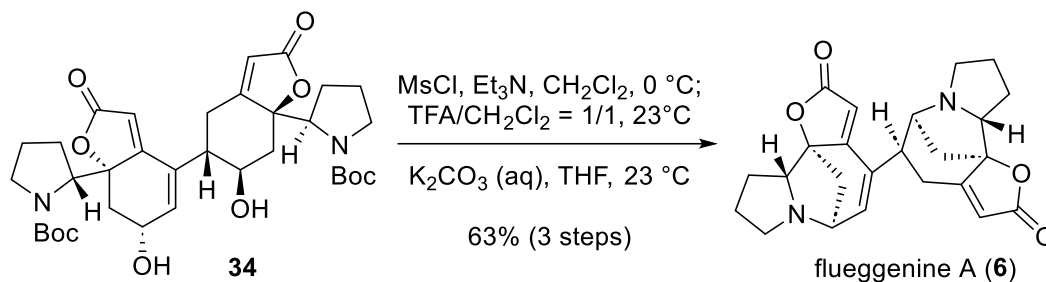

### **(-)-Flueggenine A (6):**

Triethylamine (0.16 mL, 1.15 mmol, 12.0 equiv.) and methanesulfonyl chloride (37  $\mu\text{L}$ , 0.478 mmol, 5.0 equiv.) were added to a stirred solution of **34** (62 mg,  $9.57 \times 10^{-2}$  mmol, 1 equiv.) in anhydrous dichloromethane (4.8 mL) at 0 °C. After 30 min, brine (20 mL) was added and the aqueous layer was extracted with dichloromethane ( $3 \times 10$  mL). The combined organic layer was dried over anhydrous sodium sulfate and the resulting filtrate concentrated under reduced pressure. The resulting crude mixture was dissolved in anhydrous dichloromethane (2.2 mL) and trifluoroacetic acid (2.2 mL) cosolvent and the mixture was stirred at 23 °C. After 30 min, the reaction mixture was concentrated under reduced pressure.

The resulting crude mixture was dissolved in a mixture of tetrahydrofuran (2.2 mL) and saturated aqueous potassium carbonate solution (2.2 mL). After 30 min, brine (20 mL) was added to the mixture and the resultant mixture was extracted with ethyl acetate ( $3 \times 10$  mL). The combined organic layers were dried over anhydrous sodium sulfate, filtered, and concentrated. The resulting crude residue was purified by flash purified by flash column chromatography (silica gel: diam. 2 cm, ht. 14 cm; eluent: dichloromethane : methanol : ammonium hydroxide = 10 : 0.5 : 0.1) to afford flueggenine A (**6**) (24 mg, 63%, 3 steps) as a white amorphous solid.

**$^1\text{H NMR}$**  (500 MHz,  $\text{CDCl}_3$ ):  $\delta$  6.94 (d,  $J = 6.7$  Hz, 1H), 6.01 (s, 1H), 5.74 (d,  $J = 1.9$  Hz, 1H), 3.80 (dd,  $J = 6.8, 4.5$  Hz, 1H), 3.30 – 3.27 (m, 1H), 3.23 (dd,  $J = 9.5, 6.3$  Hz, 1H), 3.19 (d,  $J = 5.9$  Hz, 1H), 3.16 (dd,  $J = 8.2, 6.9$  Hz, 1H), 3.13 (dd,  $J = 8.8, 6.4$  Hz, 1H), 3.01 (dd,  $J = 13.4, 3.6$  Hz, 1H), 2.78 – 2.70 (m, 2H), 2.70 – 2.61 (m, 4H), 2.07 – 2.00 (m, 1H), 2.00 – 1.94 (m, 2H), 1.92 – 1.82 (m, 2H), 1.81 – 1.77 (m, 1H), 1.77 – 1.71 (m, 1H), 1.75 (d,  $J = 10.5$  Hz, 1H), 1.71 – 1.64 (m, 1H), 1.58 (d,  $J = 11.0$  Hz, 1H).

**$^{13}\text{C NMR}$**  (126 MHz,  $\text{CDCl}_3$ ):  $\delta$  176.3, 175.4, 174.7, 171.8, 140.6, 135.8, 110.8, 108.2, 94.0, 93.5, 68.4, 66.4, 66.1, 60.7, 58.3, 56.1, 44.1, 37.0, 36.5, 30.3, 30.2, 29.2, 27.8, 27.8.

**HRMS** (ESI): Calculated for  $\text{C}_{24}\text{H}_{26}\text{N}_2\text{O}_4$   $[\text{M}+\text{H}]^+$ : 407.1966, found: 407.1983.

**TLC** (dichloromethane : methanol : ammonium hydroxide = 10 : 1 : 0.1)  $R_f$ : 0.35 (UV,  $\text{KMnO}_4$ ).

**$[\alpha]_D^{23}$** :  $-27.64$  (c 0.5, MeOH);

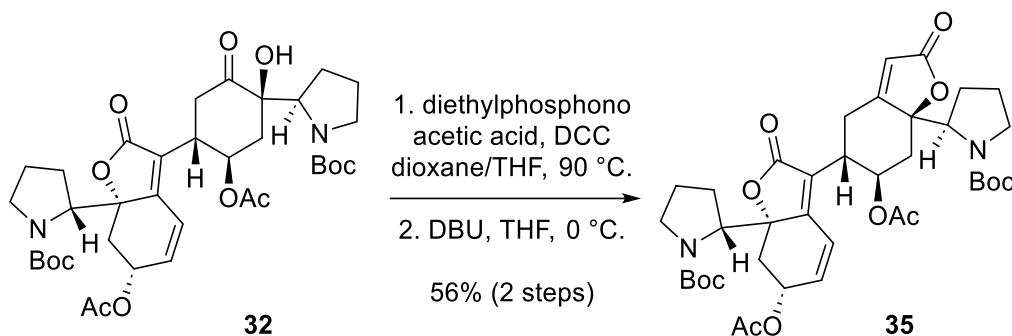

### **(+)-Dibutenolide 35:**

To a stirred solution of **32** (56 mg,  $8.25 \times 10^{-2}$  mmol, 1 equiv.) in dioxane (0.83 mL) at 23 °C was added *N,N'*-dicyclohexylcarbodiimide (341 mg, 1.65 mmol, 20.0 equiv.) under argon, and the reaction mixture was heated to 90 °C. After 30 min, a solution of diethylphosphonoacetic acid (0.13 mL, 0.825 mmol, 10.0 equiv.) in THF (0.20 mL) was added slowly via syringe pump over 3 h. After 1 h, the reaction mixture was filtered and concentrated under reduced pressure. The resulting crude residue was purified by column chromatography (silica gel: diam. 2 cm, ht. 11 cm; eluent: acetone : hexanes = 2 : 5) to afford an inseparable mixture.

To a stirred solution of the inseparable mixture in THF (0.83 mL) at 0 °C was added 1,8-diazabicyclo[5.4.0]undec-7-ene (62.0  $\mu$ L, 0.413 mmol, 5.0 equiv.) under argon. After 3 h, a saturated aqueous ammonium chloride solution (10 mL) was added and the layers were separated. The aqueous layer was extracted with ethyl acetate ( $3 \times 5$  mL), and the combined organic layers were dried over anhydrous sodium sulfate and concentrated under reduced pressure. The resulting crude residue was purified by column chromatography (silica gel: diam. 2 cm, ht. 14 cm; eluent: ethyl acetate : hexanes = 1 : 1) to afford **35** (34 mg, 56%) as a white foam:

**<sup>1</sup>H NMR** (500 MHz, CDCl<sub>3</sub>):  $\delta$  6.60 (s, 1H), 6.07 (d,  $J = 9.9$  Hz, 2H), 5.93 – 5.57 (br, 1H), 5.86 (s, 1H), 4.42 (d,  $J = 7.1$  Hz, 1H), 4.01 (d,  $J = 8.1$  Hz, 1H), 3.79 – 3.46 (br, 1H), 3.51 (brs, 1H), 3.41 – 3.26 (m, 3H), 2.90 (dd,  $J = 12.4, 6.5$  Hz, 1H), 2.86 – 2.68 (m, 3H), 1.98 (s, 3H), 1.94 – 1.87 (brs, 2H), 1.84 (s, 3H), 1.81 – 1.73 (m, 3H), 1.72 – 1.64 (m, 1H), 1.61 – 1.54 (m, 1H), 1.51 – 1.44 (m, 3H), 1.41 (s, 9H), 1.39 (s, 9H).

**<sup>13</sup>C NMR** (126 MHz, CDCl<sub>3</sub>):  $\delta$  172.1, 171.0, 169.9 (2C), 169.4, 159.6 (2C), 156.1, 136.5, 123.0, 121.2, 115.7, 90.3, 87.3, 81.6, 80.3, 69.6, 68.4, 60.5, 59.2, 47.6 (2C), 41.6, 40.3, 36.6, 28.5 (3C), 28.4 (3C), 27.5, 25.7, 25.5, 24.7, 23.7, 21.1, 21.0.

**HRMS** (ESI): Calculated for C<sub>38</sub>H<sub>50</sub>N<sub>2</sub>O<sub>12</sub> [M+Na]<sup>+</sup>: 749.3256, found: 749.3264.

**TLC** (ethyl acetate : hexanes = 1 : 1) R<sub>f</sub>: 0.39 (UV, KMnO<sub>4</sub>).

**$[\alpha]_D^{23}$** : +39.68 (c 1.0, CH<sub>2</sub>Cl<sub>2</sub>);

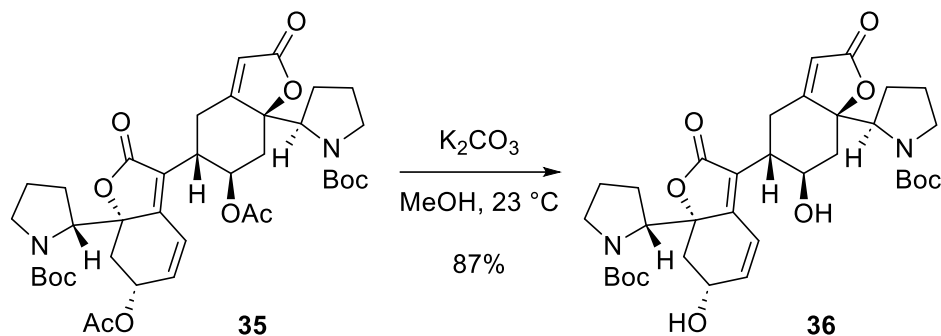

### **(+)-Dibutenolide 36:**

Potassium carbonate (29 mg, 0.209 mmol, 3.0 equiv.) was added to a stirred solution of **33** (51 mg,  $6.96 \times 10^{-2}$  mmol, 1 equiv.) in methanol (1.4 mL) at 23 °C. After 1 h, saturated aqueous ammonium chloride solution (10 mL) was added to the mixture and the resultant mixture was extracted with ethyl acetate ( $3 \times 10$  mL). The combined organic layers were dried over anhydrous sodium sulfate, filtered, and concentrated. The resulting residue was purified by flash column chromatography (silica gel: diam. 2 cm, ht. 13 cm; eluent: dichloromethane : acetone = 3 : 1) to afford **36** as a white solid (39 mg, 87%).

**<sup>1</sup>H NMR** (500 MHz, CDCl<sub>3</sub>):  $\delta$  6.53 (d,  $J = 10.0$  Hz, 1H), 6.17 (d,  $J = 10.2$  Hz, 1H), 5.81 (s, 1H), 5.14 (s, 1H), 4.63 (s, 1H), 4.41 (d,  $J = 7.6$  Hz, 1H), 3.97 (d,  $J = 7.9$  Hz, 1H), 3.53 (t,  $J = 10.2$  Hz, 2H), 3.36 (brs, 2H), 3.02 – 2.92 (m, 1H), 2.86 (s, 1H), 2.72 (t,  $J = 12.5$  Hz, 2H), 2.58 (brs, 1H), 1.92 – 1.79 (m, 2H), 1.79 – 1.61 (m, 4H), 1.57 – 1.49 (m, 2H), 1.44 (s, 9H), 1.43 (s, 9H), 1.37 – 1.28 (m, 2H).

**<sup>13</sup>C NMR** (126 MHz, CDCl<sub>3</sub>):  $\delta$  172.6, 172.2, 171.5, 161.4, 156.3 (2C), 141.7, 122.9, 119.5, 115.3, 91.4, 88.2, 80.5, 80.3, 66.6, 65.9, 60.7, 58.2, 47.6, 47.5, 43.9, 43.2, 41.1, 28.6 (3C), 28.5 (3C), 28.2, 25.7, 25.1, 24.8 (2C).

**HRMS** (ESI): Calculated for C<sub>34</sub>H<sub>46</sub>N<sub>2</sub>O<sub>10</sub> [M+Na]<sup>+</sup>: 665.3045, found: 665.3047.

**TLC** (ethyl acetate : hexanes = 4 : 1) R<sub>f</sub>: 0.43 (UV, KMnO<sub>4</sub>).

**$[\alpha]_D^{23}$** : +67.49 (c 1.0, CH<sub>2</sub>Cl<sub>2</sub>);

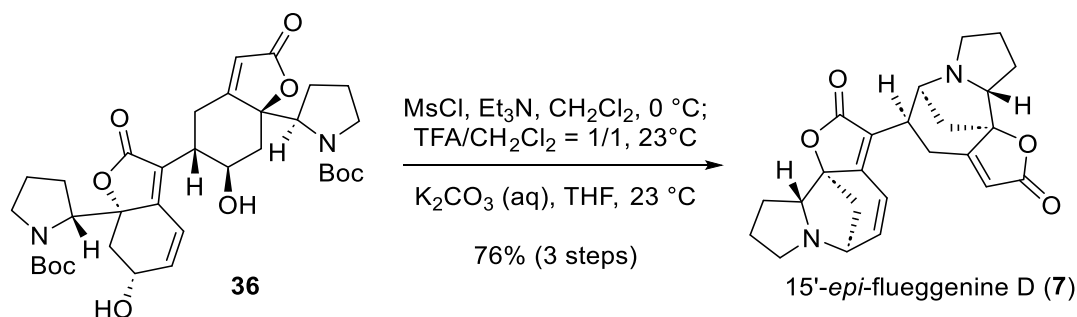

### **(-)-15'-*epi*-Flueggein D (**7**):**

Triethylamine (84  $\mu$ L, 0.605 mmol, 12.0 equiv.) and methanesulfonyl chloride (20  $\mu$ L, 0.252 mmol, 5.0 equiv.) were added to a stirred solution of **36** (32 mg,  $5.04 \times 10^{-2}$  mmol, 1 equiv.) in anhydrous dichloromethane (2.5 mL) at 0 °C. After 30 min, brine (20 mL) was added and the aqueous layer was extracted with dichloromethane ( $3 \times 10$  mL). The combined organic layer was dried over anhydrous sodium sulfate and the resulting filtrate concentrated under reduced pressure. The resulting crude mixture was dissolved in anhydrous dichloromethane (1.2 mL) and trifluoroacetic acid (1.2 mL) cosolvent and the mixture was stirred at 23 °C. After 30 min, the reaction mixture was concentrated under reduced pressure.

The resulting crude mixture was dissolved in a mixture of tetrahydrofuran (1.2 mL) and saturated aqueous potassium carbonate solution (1.2 mL). After 30 min, brine (20 mL) was added to the mixture and the resultant mixture was extracted with ethyl acetate ( $3 \times 10$  mL). The combined organic layers were dried over anhydrous sodium sulfate, filtered, and concentrated. The resulting crude residue was purified by flash purified by flash column chromatography (silica gel: diam. 2 cm, ht. 14 cm; eluent: dichloromethane : methanol : ammonium hydroxide = 10 : 0.5 : 0.1) to afford 15'-*epi*-flueggein D (**7**, 16 mg, 76%, 3 steps) as a white crystalline solid.

**$^1\text{H NMR}$**  (500 MHz,  $\text{CDCl}_3$ ):  $\delta$  7.11 (d,  $J = 9.4$  Hz, 1H), 6.66 (dd,  $J = 9.2, 6.3$  Hz, 1H), 5.62 (d,  $J = 2.2$  Hz, 1H), 3.69 – 3.54 (m, 1H), 3.29 (s, 1H), 3.25 – 3.10 (m, 3H), 3.00 – 2.88 (m, 3H), 2.80 (ddd,  $J = 13.9, 11.1, 2.4$  Hz, 1H), 2.59 – 2.49 (m, 4H), 2.01 – 1.94 (m, 2H), 1.94 – 1.84 (m, 2H), 1.83 – 1.72 (m, 3H), 1.69 (d,  $J = 10.5$  Hz, 1H), 1.66 – 1.60 (m, 1H), 1.51 (d,  $J = 11.1$  Hz, 1H).

**$^{13}\text{C NMR}$**  (126 MHz,  $\text{CDCl}_3$ ):  $\delta$  173.9, 173.1, 172.9, 163.2, 142.6, 122.4, 120.4, 110.3, 92.0, 90.7, 67.3, 65.9, 65.8, 59.9, 57.4, 55.3, 39.4, 36.0, 35.7, 29.6, 29.1, 28.7, 27.0, 26.9.

**HRMS** (ESI): Calculated for  $\text{C}_{24}\text{H}_{26}\text{N}_2\text{O}_4$   $[\text{M}+\text{H}]^+$ : 407.1966, found: 407.1965.

**TLC** (dichloromethane : methanol : ammonium hydroxide = 10 : 1 : 0.1)  $R_f$ : 0.31 (UV,  $\text{KMnO}_4$ ).

**$[\alpha]_D^{23}$** : -26.96 (c 0.25,  $\text{CH}_2\text{Cl}_2$ );

**3. Comparison of Spectroscopic Data of Natural and Synthetic Flueggeine A (6)****Table S1. Comparison of <sup>1</sup>H NMR spectroscopic data between synthetic and isolated flueggeine A (6).**

| Position | Isolation report<br>(ppm ; multi, <i>J</i> in Hz) <sup>11, a</sup> | This work<br>(ppm ; multi, <i>J</i> in Hz) <sup>b</sup> | Difference<br>(ppm) |
|----------|--------------------------------------------------------------------|---------------------------------------------------------|---------------------|
| 2        | 3.17 (dd, 8.2, 6.3)                                                | 3.16 (dd, 8.2, 6.9)                                     | -0.01               |
| 3        | a 1.88 (m)                                                         | a 1.86 (m)                                              | -0.02               |
|          | b 1.97 (m)                                                         | b 1.98 (m)                                              | 0.01                |
| 4        | a 2.03 (m)                                                         | a 2.04 (m)                                              | 0.01                |
|          | b 1.73 (m)                                                         | b 1.75 (m)                                              | 0.02                |
| 5        | a 2.65 (m)                                                         | a 2.65 (m)                                              | -                   |
|          | b 3.24 (dd, 8.6, 7.2)                                              | b 3.23 (dd, 9.5, 6.3)                                   | -0.01               |
| 7        | 3.81 (dd, 1.8, 4.7)                                                | 3.80 (dd, 6.8, 4.5)                                     | -0.01               |
| 8        | a 1.75 (d, 10.7)                                                   | a 1.75 (d, 10.5)                                        | -                   |
|          | b 2.67 (m)                                                         | b 2.65 (m)                                              | -0.02               |
| 12       | 6.00 (s)                                                           | 6.01 (s)                                                | 0.01                |
| 15       | 6.93 (d, 6.7)                                                      | 6.94 (d, 6.7)                                           | 0.01                |
| 2'       | 3.13 (dd, 9.2, 7.1)                                                | 3.13 (dd, 8.8, 6.4)                                     | -                   |
| 3'       | a 1.84 (m)                                                         | a 1.86 (m)                                              | 0.02                |
|          | b 1.75 (m)                                                         | b 1.79 (m)                                              | 0.04                |
| 4'       | a 1.96 (m)                                                         | a 1.98 (m)                                              | 0.02                |
|          | b 1.68 (m)                                                         | b 1.68 (m)                                              | -                   |
| 5'       | a 2.63 (m)                                                         | a 2.65 (m)                                              | 0.02                |
|          | b 3.29 (m)                                                         | b 3.29 (m)                                              | -                   |
| 7'       | 3.19 (m)                                                           | 3.19 (d, 5.9)                                           | -                   |
| 8'       | a 1.57 (d, 11.0)                                                   | a 1.58 (d, 11.0)                                        | 0.01                |
|          | b 2.64 (m)                                                         | b 2.65 (m)                                              | 0.01                |
| 12'      | 5.73 (d, 1.9)                                                      | 5.74 (d, 1.9)                                           | 0.01                |
| 14'      | a 2.73 (m)                                                         | a 2.73 (m)                                              | -                   |
|          | b 3.00 (m)                                                         | b 3.01 (dd, 13.4, 3.6)                                  | 0.01                |
| 15'      | 2.71 (m)                                                           | 2.73 (m)                                                | 0.02                |

<sup>a</sup> Reference: residual methanol  $\delta = 3.30$  ppm.<sup>b</sup> Reference: residual methanol  $\delta = 3.31$  ppm.

**Table S2. Comparison of  $^{13}\text{C}$  NMR spectroscopic data between synthetic and isolated flueggein A (6).**

| Position | Isolation report (ppm) <sup>11, a</sup> | This work (ppm) <sup>b</sup> | Difference (ppm) |
|----------|-----------------------------------------|------------------------------|------------------|
| 2        | 66.6                                    | 66.4                         | -0.2             |
| 3        | 30.4                                    | 30.3                         | -0.1             |
| 4        | 27.9                                    | 27.8                         | -0.1             |
| 5        | 56.3                                    | 56.1                         | -0.2             |
| 7        | 61.0                                    | 60.7                         | -0.3             |
| 8        | 37.2                                    | 37.0                         | -0.2             |
| 9        | 93.5                                    | 93.5                         | -                |
| 11       | 174.8                                   | 174.7                        | -0.1             |
| 12       | 108.4                                   | 108.2                        | -0.2             |
| 13       | 171.8                                   | 171.8                        | -                |
| 14       | 136.1                                   | 135.8                        | -0.3             |
| 15       | 140.6                                   | 140.6                        | -                |
| 2'       | 68.6                                    | 68.4                         | -0.2             |
| 3'       | 30.3                                    | 30.2                         | -0.1             |
| 4'       | 27.9                                    | 27.8                         | -0.1             |
| 5'       | 58.5                                    | 58.3                         | -0.2             |
| 7'       | 66.3                                    | 66.1                         | -0.2             |
| 8'       | 36.6                                    | 36.5                         | -0.1             |
| 9'       | 94.1                                    | 94.0                         | -0.1             |
| 11'      | 175.6                                   | 175.4                        | -0.2             |
| 12'      | 110.9                                   | 110.8                        | -0.1             |
| 13'      | 176.4                                   | 176.3                        | -0.1             |
| 14'      | 29.3                                    | 29.2                         | -0.1             |
| 15'      | 44.3                                    | 44.1                         | -0.2             |

<sup>a</sup> Reference: residual chloroform  $\delta = 49.2$  ppm.

<sup>b</sup> Reference: residual chloroform  $\delta = 49.2$  ppm.

## 4. Single Crystal X-Ray Diffraction Analysis of Compounds 20, 23, 28, 32, and 7

### 4.1 X-ray Crystal Structure of Compound 20

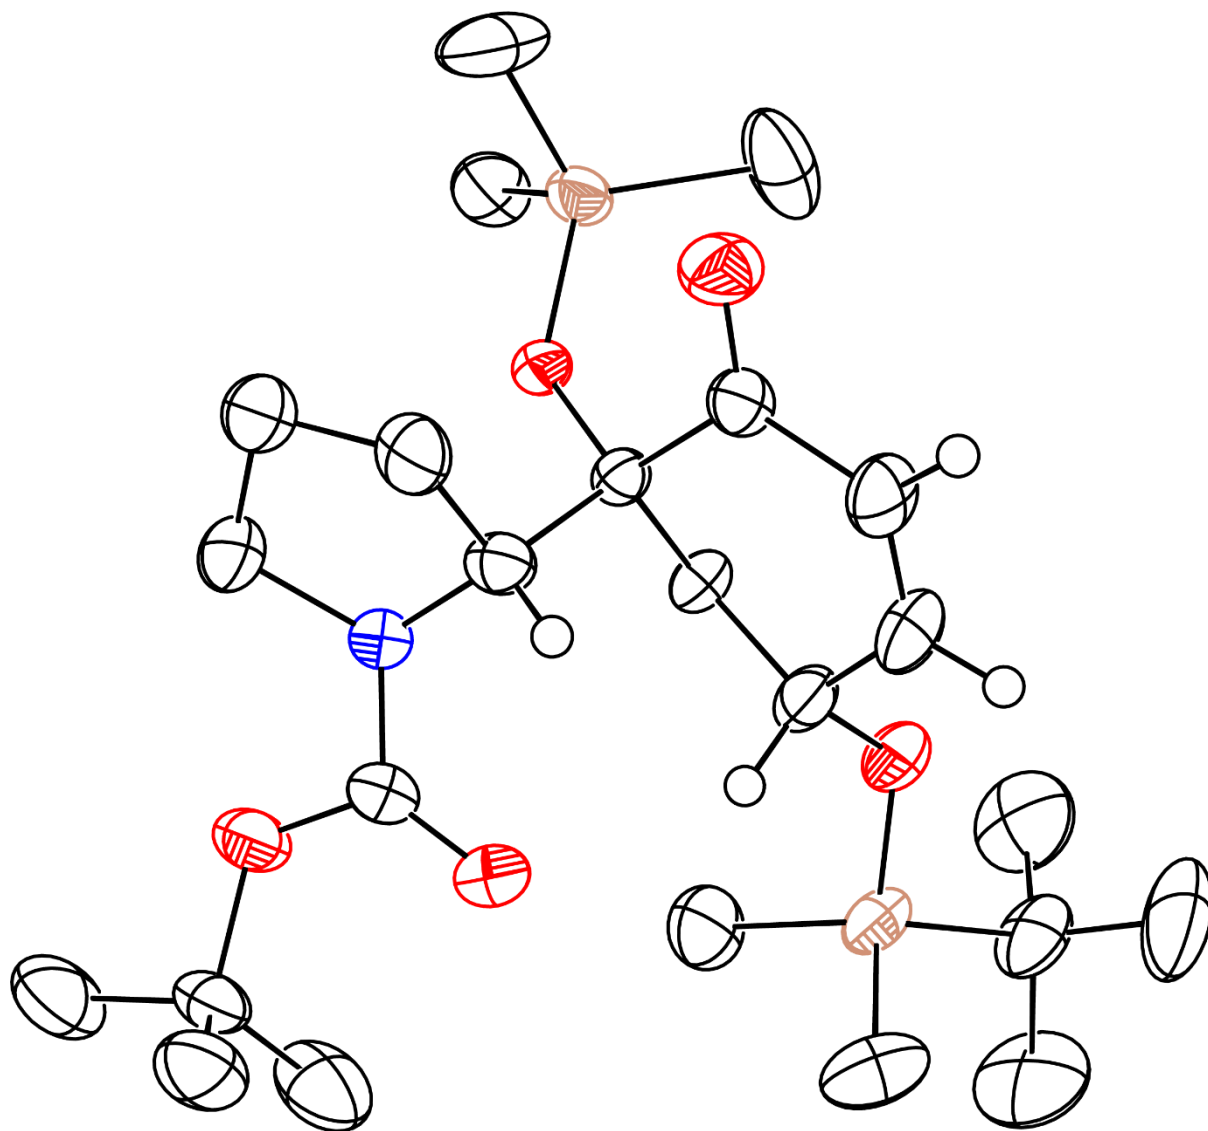

**Figure S1.** Thermal ellipsoid representation of **20**

**Table S3.** Crystal data and structure refinement for **20**.

|                                   |                                                                  |                  |
|-----------------------------------|------------------------------------------------------------------|------------------|
| Empirical formula                 | C <sub>24</sub> H <sub>45</sub> N O <sub>5</sub> Si <sub>2</sub> |                  |
| Formula weight                    | 483.79                                                           |                  |
| Temperature                       | 173(2) K                                                         |                  |
| Wavelength                        | 0.71073 Å                                                        |                  |
| Crystal system                    | Monoclinic                                                       |                  |
| Space group                       | P2 <sub>1</sub>                                                  |                  |
| Unit cell dimensions              | a = 6.8112(3) Å                                                  | α = 90°          |
|                                   | b = 9.0531(4) Å                                                  | β = 95.8682(16)° |
|                                   | c = 23.2935(10) Å                                                | γ = 90°          |
| Volume                            | 1428.81(11) Å <sup>3</sup>                                       |                  |
| Z                                 | 2                                                                |                  |
| Density (calculated)              | 1.125 Mg/m <sup>3</sup>                                          |                  |
| Absorption coefficient            | 0.155 mm <sup>-1</sup>                                           |                  |
| F(000)                            | 528                                                              |                  |
| Crystal size                      | 0.212 x 0.162 x 0.042 mm <sup>3</sup>                            |                  |
| Theta range for data collection   | 2.637 to 28.983°.                                                |                  |
| Index ranges                      | -9<=h<=9, -12<=k<=12, -31<=l<=30                                 |                  |
| Reflections collected             | 28483                                                            |                  |
| Independent reflections           | 7574 [R(int) = 0.0602]                                           |                  |
| Completeness to theta = 25.242°   | 99.9 %                                                           |                  |
| Absorption correction             | Semi-empirical from equivalents                                  |                  |
| Max. and min. transmission        | 0.7458 and 0.7152                                                |                  |
| Refinement method                 | Full-matrix least-squares on F <sup>2</sup>                      |                  |
| Data / restraints / parameters    | 7574 / 97 / 334                                                  |                  |
| Goodness-of-fit on F <sup>2</sup> | 1.051                                                            |                  |
| Final R indices [I>2sigma(I)]     | R1 = 0.0372, wR2 = 0.0882                                        |                  |
| R indices (all data)              | R1 = 0.0423, wR2 = 0.0902                                        |                  |
| Absolute structure parameter      | 0.08(4)                                                          |                  |
| Largest diff. peak and hole       | 0.262 and -0.162 e·Å <sup>-3</sup>                               |                  |



**Table S4.** Atomic coordinates ( $\times 10^4$ ) and equivalent isotropic displacement parameters ( $\text{\AA}^2 \times 10^3$ ) for **20**. U(eq) is defined as one third of the trace of the orthogonalized  $U^{ij}$  tensor.

|        | x        | y        | z        | U(eq) |
|--------|----------|----------|----------|-------|
| C(1)   | 2522(3)  | 6777(2)  | 2299(1)  | 26(1) |
| C(2)   | 1210(3)  | 6269(2)  | 2752(1)  | 30(1) |
| C(3)   | -930(3)  | 6363(3)  | 2534(1)  | 38(1) |
| C(4)   | -1604(3) | 6432(3)  | 1977(1)  | 36(1) |
| C(5)   | -274(3)  | 6430(2)  | 1518(1)  | 28(1) |
| C(6)   | 1934(3)  | 6155(2)  | 1693(1)  | 22(1) |
| C(7)   | 2228(3)  | 4451(2)  | 1656(1)  | 28(1) |
| C(8)   | 1647(10) | 3853(10) | 1059(3)  | 38(1) |
| C(9)   | 3652(7)  | 3774(6)  | 785(2)   | 49(1) |
| C(10)  | 5192(17) | 3517(9)  | 1283(5)  | 40(2) |
| C(8B)  | 2020(30) | 3860(30) | 987(8)   | 37(2) |
| C(9B)  | 3793(15) | 3108(12) | 896(4)   | 42(2) |
| C(10B) | 5390(30) | 3852(19) | 1308(11) | 31(3) |
| N(11)  | 4281(3)  | 3981(2)  | 1811(1)  | 31(1) |
| O(12)  | 1545(3)  | 7181(2)  | 3252(1)  | 38(1) |
| Si(13) | 2722(1)  | 6630(1)  | 3872(1)  | 33(1) |
| C(14)  | 1678(5)  | 4856(3)  | 4104(1)  | 54(1) |
| C(15)  | 5367(4)  | 6328(3)  | 3783(1)  | 51(1) |
| C(16)  | 2344(4)  | 8182(4)  | 4384(1)  | 46(1) |
| C(17)  | 3298(7)  | 7794(5)  | 4992(1)  | 81(1) |
| C(18)  | 138(5)   | 8448(5)  | 4407(2)  | 77(1) |
| C(19)  | 3260(7)  | 9603(4)  | 4177(2)  | 73(1) |
| O(20)  | -900(2)  | 6609(2)  | 1015(1)  | 40(1) |
| O(21)  | 3130(2)  | 6821(1)  | 1306(1)  | 24(1) |
| Si(22) | 2841(1)  | 8240(1)  | 858(1)   | 29(1) |
| C(23)  | 5362(4)  | 9032(3)  | 863(1)   | 42(1) |
| C(24)  | 1994(5)  | 7634(4)  | 111(1)   | 58(1) |
| C(25)  | 1199(5)  | 9697(3)  | 1112(2)  | 61(1) |
| C(26)  | 4769(3)  | 3296(2)  | 2325(1)  | 31(1) |
| O(27)  | 3746(3)  | 3293(2)  | 2724(1)  | 41(1) |
| O(28)  | 6560(3)  | 2656(2)  | 2334(1)  | 39(1) |
| C(29)  | 7215(3)  | 1560(2)  | 2782(1)  | 36(1) |
| C(30)  | 7424(6)  | 2242(3)  | 3378(1)  | 63(1) |

|       |         |         |         |       |
|-------|---------|---------|---------|-------|
| C(31) | 5766(5) | 285(3)  | 2745(1) | 48(1) |
| C(32) | 9179(5) | 1062(4) | 2596(2) | 59(1) |

---

**Table S5.** Bond lengths [ $\text{\AA}$ ] and angles [ $^\circ$ ] for **20**.

---

|               |           |
|---------------|-----------|
| C(1)-C(2)     | 1.523(3)  |
| C(1)-C(6)     | 1.534(2)  |
| C(1)-H(1A)    | 0.9900    |
| C(1)-H(1B)    | 0.9900    |
| C(2)-O(12)    | 1.427(2)  |
| C(2)-C(3)     | 1.496(3)  |
| C(2)-H(2)     | 1.01(3)   |
| C(3)-C(4)     | 1.334(3)  |
| C(3)-H(3)     | 0.9500    |
| C(4)-C(5)     | 1.469(3)  |
| C(4)-H(4)     | 0.9500    |
| C(5)-O(20)    | 1.216(2)  |
| C(5)-C(6)     | 1.538(3)  |
| C(6)-O(21)    | 1.411(2)  |
| C(6)-C(7)     | 1.559(2)  |
| C(7)-N(11)    | 1.471(3)  |
| C(7)-C(8)     | 1.507(8)  |
| C(7)-C(8B)    | 1.640(19) |
| C(7)-H(7)     | 0.89(3)   |
| C(8)-C(9)     | 1.567(8)  |
| C(8)-H(8A)    | 0.9900    |
| C(8)-H(8B)    | 0.9900    |
| C(9)-C(10)    | 1.501(12) |
| C(9)-H(9A)    | 0.9900    |
| C(9)-H(9B)    | 0.9900    |
| C(10)-N(11)   | 1.493(13) |
| C(10)-H(10A)  | 0.9900    |
| C(10)-H(10B)  | 0.9900    |
| C(8B)-C(9B)   | 1.42(2)   |
| C(8B)-H(8C)   | 0.9900    |
| C(8B)-H(8D)   | 0.9900    |
| C(9B)-C(10B)  | 1.53(2)   |
| C(9B)-H(9C)   | 0.9900    |
| C(9B)-H(9D)   | 0.9900    |
| C(10B)-N(11)  | 1.46(3)   |
| C(10B)-H(10C) | 0.9900    |

|               |            |
|---------------|------------|
| C(10B)-H(10D) | 0.9900     |
| N(11)-C(26)   | 1.360(2)   |
| O(12)-Si(13)  | 1.6542(17) |
| Si(13)-C(15)  | 1.854(3)   |
| Si(13)-C(14)  | 1.859(3)   |
| Si(13)-C(16)  | 1.879(3)   |
| C(14)-H(14A)  | 0.9800     |
| C(14)-H(14B)  | 0.9800     |
| C(14)-H(14C)  | 0.9800     |
| C(15)-H(15A)  | 0.9800     |
| C(15)-H(15B)  | 0.9800     |
| C(15)-H(15C)  | 0.9800     |
| C(16)-C(18)   | 1.528(4)   |
| C(16)-C(19)   | 1.529(5)   |
| C(16)-C(17)   | 1.536(4)   |
| C(17)-H(17A)  | 0.9800     |
| C(17)-H(17B)  | 0.9800     |
| C(17)-H(17C)  | 0.9800     |
| C(18)-H(18A)  | 0.9800     |
| C(18)-H(18B)  | 0.9800     |
| C(18)-H(18C)  | 0.9800     |
| C(19)-H(19A)  | 0.9800     |
| C(19)-H(19B)  | 0.9800     |
| C(19)-H(19C)  | 0.9800     |
| O(21)-Si(22)  | 1.6548(13) |
| Si(22)-C(24)  | 1.859(3)   |
| Si(22)-C(23)  | 1.859(3)   |
| Si(22)-C(25)  | 1.864(3)   |
| C(23)-H(23A)  | 0.9800     |
| C(23)-H(23B)  | 0.9800     |
| C(23)-H(23C)  | 0.9800     |
| C(24)-H(24A)  | 0.9800     |
| C(24)-H(24B)  | 0.9800     |
| C(24)-H(24C)  | 0.9800     |
| C(25)-H(25A)  | 0.9800     |
| C(25)-H(25B)  | 0.9800     |
| C(25)-H(25C)  | 0.9800     |
| C(26)-O(27)   | 1.216(3)   |

|                  |            |
|------------------|------------|
| C(26)-O(28)      | 1.349(3)   |
| O(28)-C(29)      | 1.474(2)   |
| C(29)-C(30)      | 1.513(3)   |
| C(29)-C(32)      | 1.516(4)   |
| C(29)-C(31)      | 1.516(3)   |
| C(30)-H(30A)     | 0.9800     |
| C(30)-H(30B)     | 0.9800     |
| C(30)-H(30C)     | 0.9800     |
| C(31)-H(31A)     | 0.9800     |
| C(31)-H(31B)     | 0.9800     |
| C(31)-H(31C)     | 0.9800     |
| C(32)-H(32A)     | 0.9800     |
| C(32)-H(32B)     | 0.9800     |
| C(32)-H(32C)     | 0.9800     |
|                  |            |
| C(2)-C(1)-C(6)   | 114.25(16) |
| C(2)-C(1)-H(1A)  | 108.7      |
| C(6)-C(1)-H(1A)  | 108.7      |
| C(2)-C(1)-H(1B)  | 108.7      |
| C(6)-C(1)-H(1B)  | 108.7      |
| H(1A)-C(1)-H(1B) | 107.6      |
| O(12)-C(2)-C(3)  | 108.26(17) |
| O(12)-C(2)-C(1)  | 109.63(17) |
| C(3)-C(2)-C(1)   | 111.61(17) |
| O(12)-C(2)-H(2)  | 107.8(17)  |
| C(3)-C(2)-H(2)   | 109.6(18)  |
| C(1)-C(2)-H(2)   | 109.8(18)  |
| C(4)-C(3)-C(2)   | 124.00(18) |
| C(4)-C(3)-H(3)   | 118.0      |
| C(2)-C(3)-H(3)   | 118.0      |
| C(3)-C(4)-C(5)   | 122.10(19) |
| C(3)-C(4)-H(4)   | 118.9      |
| C(5)-C(4)-H(4)   | 118.9      |
| O(20)-C(5)-C(4)  | 121.24(19) |
| O(20)-C(5)-C(6)  | 120.90(17) |
| C(4)-C(5)-C(6)   | 117.85(17) |
| O(21)-C(6)-C(1)  | 108.51(14) |
| O(21)-C(6)-C(5)  | 112.02(15) |

|                     |            |
|---------------------|------------|
| C(1)-C(6)-C(5)      | 109.88(15) |
| O(21)-C(6)-C(7)     | 107.59(15) |
| C(1)-C(6)-C(7)      | 113.02(15) |
| C(5)-C(6)-C(7)      | 105.84(15) |
| N(11)-C(7)-C(8)     | 106.0(3)   |
| N(11)-C(7)-C(6)     | 113.37(16) |
| C(8)-C(7)-C(6)      | 112.6(4)   |
| N(11)-C(7)-C(8B)    | 97.2(7)    |
| C(6)-C(7)-C(8B)     | 112.1(8)   |
| N(11)-C(7)-H(7)     | 109(2)     |
| C(8)-C(7)-H(7)      | 108.9(19)  |
| C(6)-C(7)-H(7)      | 106.9(19)  |
| C(8B)-C(7)-H(7)     | 118(2)     |
| C(7)-C(8)-C(9)      | 103.6(5)   |
| C(7)-C(8)-H(8A)     | 111.0      |
| C(9)-C(8)-H(8A)     | 111.0      |
| C(7)-C(8)-H(8B)     | 111.0      |
| C(9)-C(8)-H(8B)     | 111.0      |
| H(8A)-C(8)-H(8B)    | 109.0      |
| C(10)-C(9)-C(8)     | 105.1(6)   |
| C(10)-C(9)-H(9A)    | 110.7      |
| C(8)-C(9)-H(9A)     | 110.7      |
| C(10)-C(9)-H(9B)    | 110.7      |
| C(8)-C(9)-H(9B)     | 110.7      |
| H(9A)-C(9)-H(9B)    | 108.8      |
| N(11)-C(10)-C(9)    | 106.1(7)   |
| N(11)-C(10)-H(10A)  | 110.5      |
| C(9)-C(10)-H(10A)   | 110.5      |
| N(11)-C(10)-H(10B)  | 110.5      |
| C(9)-C(10)-H(10B)   | 110.5      |
| H(10A)-C(10)-H(10B) | 108.7      |
| C(9B)-C(8B)-C(7)    | 107.8(13)  |
| C(9B)-C(8B)-H(8C)   | 110.1      |
| C(7)-C(8B)-H(8C)    | 110.1      |
| C(9B)-C(8B)-H(8D)   | 110.1      |
| C(7)-C(8B)-H(8D)    | 110.1      |
| H(8C)-C(8B)-H(8D)   | 108.5      |
| C(8B)-C(9B)-C(10B)  | 104.9(13)  |

|                      |            |
|----------------------|------------|
| C(8B)-C(9B)-H(9C)    | 110.8      |
| C(10B)-C(9B)-H(9C)   | 110.8      |
| C(8B)-C(9B)-H(9D)    | 110.8      |
| C(10B)-C(9B)-H(9D)   | 110.8      |
| H(9C)-C(9B)-H(9D)    | 108.8      |
| N(11)-C(10B)-C(9B)   | 98.2(13)   |
| N(11)-C(10B)-H(10C)  | 112.1      |
| C(9B)-C(10B)-H(10C)  | 112.1      |
| N(11)-C(10B)-H(10D)  | 112.1      |
| C(9B)-C(10B)-H(10D)  | 112.1      |
| H(10C)-C(10B)-H(10D) | 109.8      |
| C(26)-N(11)-C(10B)   | 124.7(9)   |
| C(26)-N(11)-C(7)     | 119.21(17) |
| C(10B)-N(11)-C(7)    | 112.6(9)   |
| C(26)-N(11)-C(10)    | 120.8(4)   |
| C(7)-N(11)-C(10)     | 110.2(4)   |
| C(2)-O(12)-Si(13)    | 124.12(14) |
| O(12)-Si(13)-C(15)   | 109.72(12) |
| O(12)-Si(13)-C(14)   | 110.38(12) |
| C(15)-Si(13)-C(14)   | 108.05(14) |
| O(12)-Si(13)-C(16)   | 104.08(11) |
| C(15)-Si(13)-C(16)   | 112.26(13) |
| C(14)-Si(13)-C(16)   | 112.32(14) |
| Si(13)-C(14)-H(14A)  | 109.5      |
| Si(13)-C(14)-H(14B)  | 109.5      |
| H(14A)-C(14)-H(14B)  | 109.5      |
| Si(13)-C(14)-H(14C)  | 109.5      |
| H(14A)-C(14)-H(14C)  | 109.5      |
| H(14B)-C(14)-H(14C)  | 109.5      |
| Si(13)-C(15)-H(15A)  | 109.5      |
| Si(13)-C(15)-H(15B)  | 109.5      |
| H(15A)-C(15)-H(15B)  | 109.5      |
| Si(13)-C(15)-H(15C)  | 109.5      |
| H(15A)-C(15)-H(15C)  | 109.5      |
| H(15B)-C(15)-H(15C)  | 109.5      |
| C(18)-C(16)-C(19)    | 108.2(3)   |
| C(18)-C(16)-C(17)    | 109.2(3)   |
| C(19)-C(16)-C(17)    | 109.6(3)   |

|                     |            |
|---------------------|------------|
| C(18)-C(16)-Si(13)  | 109.8(2)   |
| C(19)-C(16)-Si(13)  | 110.00(18) |
| C(17)-C(16)-Si(13)  | 110.0(2)   |
| C(16)-C(17)-H(17A)  | 109.5      |
| C(16)-C(17)-H(17B)  | 109.5      |
| H(17A)-C(17)-H(17B) | 109.5      |
| C(16)-C(17)-H(17C)  | 109.5      |
| H(17A)-C(17)-H(17C) | 109.5      |
| H(17B)-C(17)-H(17C) | 109.5      |
| C(16)-C(18)-H(18A)  | 109.5      |
| C(16)-C(18)-H(18B)  | 109.5      |
| H(18A)-C(18)-H(18B) | 109.5      |
| C(16)-C(18)-H(18C)  | 109.5      |
| H(18A)-C(18)-H(18C) | 109.5      |
| H(18B)-C(18)-H(18C) | 109.5      |
| C(16)-C(19)-H(19A)  | 109.5      |
| C(16)-C(19)-H(19B)  | 109.5      |
| H(19A)-C(19)-H(19B) | 109.5      |
| C(16)-C(19)-H(19C)  | 109.5      |
| H(19A)-C(19)-H(19C) | 109.5      |
| H(19B)-C(19)-H(19C) | 109.5      |
| C(6)-O(21)-Si(22)   | 134.11(12) |
| O(21)-Si(22)-C(24)  | 111.52(12) |
| O(21)-Si(22)-C(23)  | 104.18(9)  |
| C(24)-Si(22)-C(23)  | 108.56(14) |
| O(21)-Si(22)-C(25)  | 112.67(11) |
| C(24)-Si(22)-C(25)  | 111.54(17) |
| C(23)-Si(22)-C(25)  | 107.98(13) |
| Si(22)-C(23)-H(23A) | 109.5      |
| Si(22)-C(23)-H(23B) | 109.5      |
| H(23A)-C(23)-H(23B) | 109.5      |
| Si(22)-C(23)-H(23C) | 109.5      |
| H(23A)-C(23)-H(23C) | 109.5      |
| H(23B)-C(23)-H(23C) | 109.5      |
| Si(22)-C(24)-H(24A) | 109.5      |
| Si(22)-C(24)-H(24B) | 109.5      |
| H(24A)-C(24)-H(24B) | 109.5      |
| Si(22)-C(24)-H(24C) | 109.5      |



|                     |            |
|---------------------|------------|
| H(24A)-C(24)-H(24C) | 109.5      |
| H(24B)-C(24)-H(24C) | 109.5      |
| Si(22)-C(25)-H(25A) | 109.5      |
| Si(22)-C(25)-H(25B) | 109.5      |
| H(25A)-C(25)-H(25B) | 109.5      |
| Si(22)-C(25)-H(25C) | 109.5      |
| H(25A)-C(25)-H(25C) | 109.5      |
| H(25B)-C(25)-H(25C) | 109.5      |
| O(27)-C(26)-O(28)   | 125.10(19) |
| O(27)-C(26)-N(11)   | 124.5(2)   |
| O(28)-C(26)-N(11)   | 110.39(17) |
| C(26)-O(28)-C(29)   | 120.51(17) |
| O(28)-C(29)-C(30)   | 111.58(19) |
| O(28)-C(29)-C(32)   | 102.18(19) |
| C(30)-C(29)-C(32)   | 112.4(2)   |
| O(28)-C(29)-C(31)   | 108.92(19) |
| C(30)-C(29)-C(31)   | 111.2(2)   |
| C(32)-C(29)-C(31)   | 110.2(2)   |
| C(29)-C(30)-H(30A)  | 109.5      |
| C(29)-C(30)-H(30B)  | 109.5      |
| H(30A)-C(30)-H(30B) | 109.5      |
| C(29)-C(30)-H(30C)  | 109.5      |
| H(30A)-C(30)-H(30C) | 109.5      |
| H(30B)-C(30)-H(30C) | 109.5      |
| C(29)-C(31)-H(31A)  | 109.5      |
| C(29)-C(31)-H(31B)  | 109.5      |
| H(31A)-C(31)-H(31B) | 109.5      |
| C(29)-C(31)-H(31C)  | 109.5      |
| H(31A)-C(31)-H(31C) | 109.5      |
| H(31B)-C(31)-H(31C) | 109.5      |
| C(29)-C(32)-H(32A)  | 109.5      |
| C(29)-C(32)-H(32B)  | 109.5      |
| H(32A)-C(32)-H(32B) | 109.5      |
| C(29)-C(32)-H(32C)  | 109.5      |
| H(32A)-C(32)-H(32C) | 109.5      |
| H(32B)-C(32)-H(32C) | 109.5      |

---

Symmetry transformations used to generate equivalent atoms:

**Table S6.** Anisotropic displacement parameters ( $\text{\AA}^2 \times 10^3$ ) for **20**. The anisotropic displacement factor exponent takes the form:  $-2\pi^2 [ h^2 a^{*2} U^{11} + \dots + 2 h k a^* b^* U^{12} ]$ 

|        | $U^{11}$ | $U^{22}$ | $U^{33}$ | $U^{23}$ | $U^{13}$ | $U^{12}$ |
|--------|----------|----------|----------|----------|----------|----------|
| C(1)   | 27(1)    | 30(1)    | 20(1)    | -3(1)    | 5(1)     | -3(1)    |
| C(2)   | 35(1)    | 35(1)    | 23(1)    | -2(1)    | 10(1)    | 0(1)     |
| C(3)   | 32(1)    | 50(1)    | 36(1)    | -2(1)    | 17(1)    | -3(1)    |
| C(4)   | 23(1)    | 46(1)    | 40(1)    | 1(1)     | 10(1)    | -3(1)    |
| C(5)   | 23(1)    | 29(1)    | 31(1)    | 3(1)     | 4(1)     | -1(1)    |
| C(6)   | 22(1)    | 24(1)    | 21(1)    | 2(1)     | 4(1)     | -1(1)    |
| C(7)   | 33(1)    | 24(1)    | 26(1)    | 2(1)     | 1(1)     | 0(1)     |
| C(8)   | 49(3)    | 30(1)    | 32(2)    | -10(2)   | -3(2)    | 6(2)     |
| C(9)   | 74(2)    | 42(2)    | 31(2)    | -5(1)    | 5(2)     | 20(2)    |
| C(10)  | 56(3)    | 35(3)    | 31(2)    | -4(2)    | 12(2)    | 8(2)     |
| C(8B)  | 49(3)    | 31(3)    | 29(3)    | -8(3)    | -1(3)    | 3(3)     |
| C(9B)  | 54(3)    | 36(3)    | 37(3)    | -10(2)   | 9(2)     | 4(3)     |
| C(10B) | 32(5)    | 33(7)    | 29(5)    | -7(5)    | 8(4)     | 2(5)     |
| N(11)  | 37(1)    | 31(1)    | 26(1)    | 5(1)     | 7(1)     | 9(1)     |
| O(12)  | 51(1)    | 43(1)    | 21(1)    | -5(1)    | 8(1)     | 7(1)     |
| Si(13) | 32(1)    | 45(1)    | 24(1)    | 1(1)     | 8(1)     | -4(1)    |
| C(14)  | 59(2)    | 64(2)    | 40(1)    | 12(1)    | 6(1)     | -22(1)   |
| C(15)  | 37(1)    | 55(1)    | 62(2)    | 7(1)     | 14(1)    | 2(1)     |
| C(16)  | 49(1)    | 65(1)    | 26(1)    | -13(1)   | 5(1)     | -3(1)    |
| C(17)  | 108(3)   | 101(3)   | 32(1)    | -15(2)   | -11(2)   | -6(2)    |
| C(18)  | 62(2)    | 115(3)   | 58(2)    | -34(2)   | 19(2)    | 18(2)    |
| C(19)  | 99(3)    | 57(2)    | 62(2)    | -20(2)   | 13(2)    | -10(2)   |
| O(20)  | 29(1)    | 57(1)    | 32(1)    | 7(1)     | -2(1)    | 3(1)     |
| O(21)  | 24(1)    | 27(1)    | 23(1)    | 6(1)     | 6(1)     | 2(1)     |
| Si(22) | 28(1)    | 29(1)    | 32(1)    | 10(1)    | 6(1)     | 4(1)     |
| C(23)  | 36(1)    | 41(1)    | 52(1)    | 15(1)    | 13(1)    | -2(1)    |
| C(24)  | 60(2)    | 85(2)    | 28(1)    | 18(1)    | -4(1)    | -6(2)    |
| C(25)  | 49(2)    | 32(1)    | 107(3)   | 12(1)    | 26(2)    | 11(1)    |
| C(26)  | 35(1)    | 26(1)    | 31(1)    | 6(1)     | 2(1)     | 3(1)     |
| O(27)  | 47(1)    | 47(1)    | 30(1)    | 12(1)    | 10(1)    | 12(1)    |
| O(28)  | 35(1)    | 39(1)    | 43(1)    | 17(1)    | 7(1)     | 8(1)     |
| C(29)  | 40(1)    | 31(1)    | 35(1)    | 9(1)     | -3(1)    | 7(1)     |
| C(30)  | 80(2)    | 56(1)    | 48(2)    | -6(1)    | -23(2)   | 20(2)    |

|       |       |       |       |       |      |       |
|-------|-------|-------|-------|-------|------|-------|
| C(31) | 57(2) | 33(1) | 56(2) | 9(1)  | 6(1) | -1(1) |
| C(32) | 44(2) | 57(2) | 76(2) | 23(1) | 7(1) | 16(1) |

---

**Table S7.** Hydrogen coordinates (  $\times 10^4$  ) and isotropic displacement parameters (  $\text{\AA}^2 \times 10^3$  ) for **20**.

|        | x        | y        | z        | U(eq) |
|--------|----------|----------|----------|-------|
| H(1A)  | 3899     | 6480     | 2423     | 31    |
| H(1B)  | 2487     | 7869     | 2279     | 31    |
| H(2)   | 1550(50) | 5220(30) | 2872(13) | 46    |
| H(3)   | -1867    | 6374     | 2810     | 46    |
| H(4)   | -2987    | 6485     | 1873     | 43    |
| H(7)   | 1470(50) | 4040(30) | 1899(12) | 42    |
| H(8A)  | 705      | 4521     | 836      | 45    |
| H(8B)  | 1043     | 2861     | 1077     | 45    |
| H(9A)  | 3638     | 2953     | 504      | 59    |
| H(9B)  | 3906     | 4710     | 585      | 59    |
| H(10A) | 5566     | 2460     | 1308     | 48    |
| H(10B) | 6387     | 4110     | 1238     | 48    |
| H(8C)  | 878      | 3184     | 919      | 44    |
| H(8D)  | 1810     | 4705     | 717      | 44    |
| H(9C)  | 4088     | 3214     | 490      | 51    |
| H(9D)  | 3691     | 2044     | 986      | 51    |
| H(10C) | 6579     | 3221     | 1387     | 37    |
| H(10D) | 5781     | 4828     | 1164     | 37    |
| H(14A) | 2325     | 4580     | 4484     | 82    |
| H(14B) | 1901     | 4083     | 3824     | 82    |
| H(14C) | 257      | 4971     | 4127     | 82    |
| H(15A) | 6066     | 6028     | 4154     | 76    |
| H(15B) | 5942     | 7245     | 3653     | 76    |
| H(15C) | 5490     | 5550     | 3497     | 76    |
| H(17A) | 3076     | 8601     | 5258     | 122   |
| H(17B) | 4720     | 7648     | 4981     | 122   |
| H(17C) | 2708     | 6884     | 5124     | 122   |
| H(18A) | -51      | 9270     | 4670     | 116   |
| H(18B) | -472     | 7554     | 4547     | 116   |
| H(18C) | -479     | 8689     | 4020     | 116   |
| H(19A) | 2995     | 10418    | 4436     | 109   |
| H(19B) | 2683     | 9830     | 3785     | 109   |
| H(19C) | 4689     | 9471     | 4180     | 109   |

|        |       |       |      |    |
|--------|-------|-------|------|----|
| H(23A) | 5344  | 9833  | 580  | 64 |
| H(23B) | 6278  | 8261  | 764  | 64 |
| H(23C) | 5791  | 9421  | 1248 | 64 |
| H(24A) | 2097  | 8460  | -156 | 87 |
| H(24B) | 618   | 7307  | 93   | 87 |
| H(24C) | 2821  | 6815  | 2    | 87 |
| H(25A) | 1180  | 10551 | 853  | 92 |
| H(25B) | 1695  | 10001 | 1504 | 92 |
| H(25C) | -142  | 9304  | 1112 | 92 |
| H(30A) | 7965  | 1509  | 3660 | 95 |
| H(30B) | 6126  | 2567  | 3475 | 95 |
| H(30C) | 8315  | 3093  | 3383 | 95 |
| H(31A) | 6284  | -510  | 3003 | 73 |
| H(31B) | 5579  | -84   | 2348 | 73 |
| H(31C) | 4497  | 624   | 2861 | 73 |
| H(32A) | 9708  | 256   | 2847 | 88 |
| H(32B) | 10107 | 1892  | 2625 | 88 |
| H(32C) | 8990  | 714   | 2196 | 88 |

---

## 4.2 X-ray Crystal Structure of Compound 23

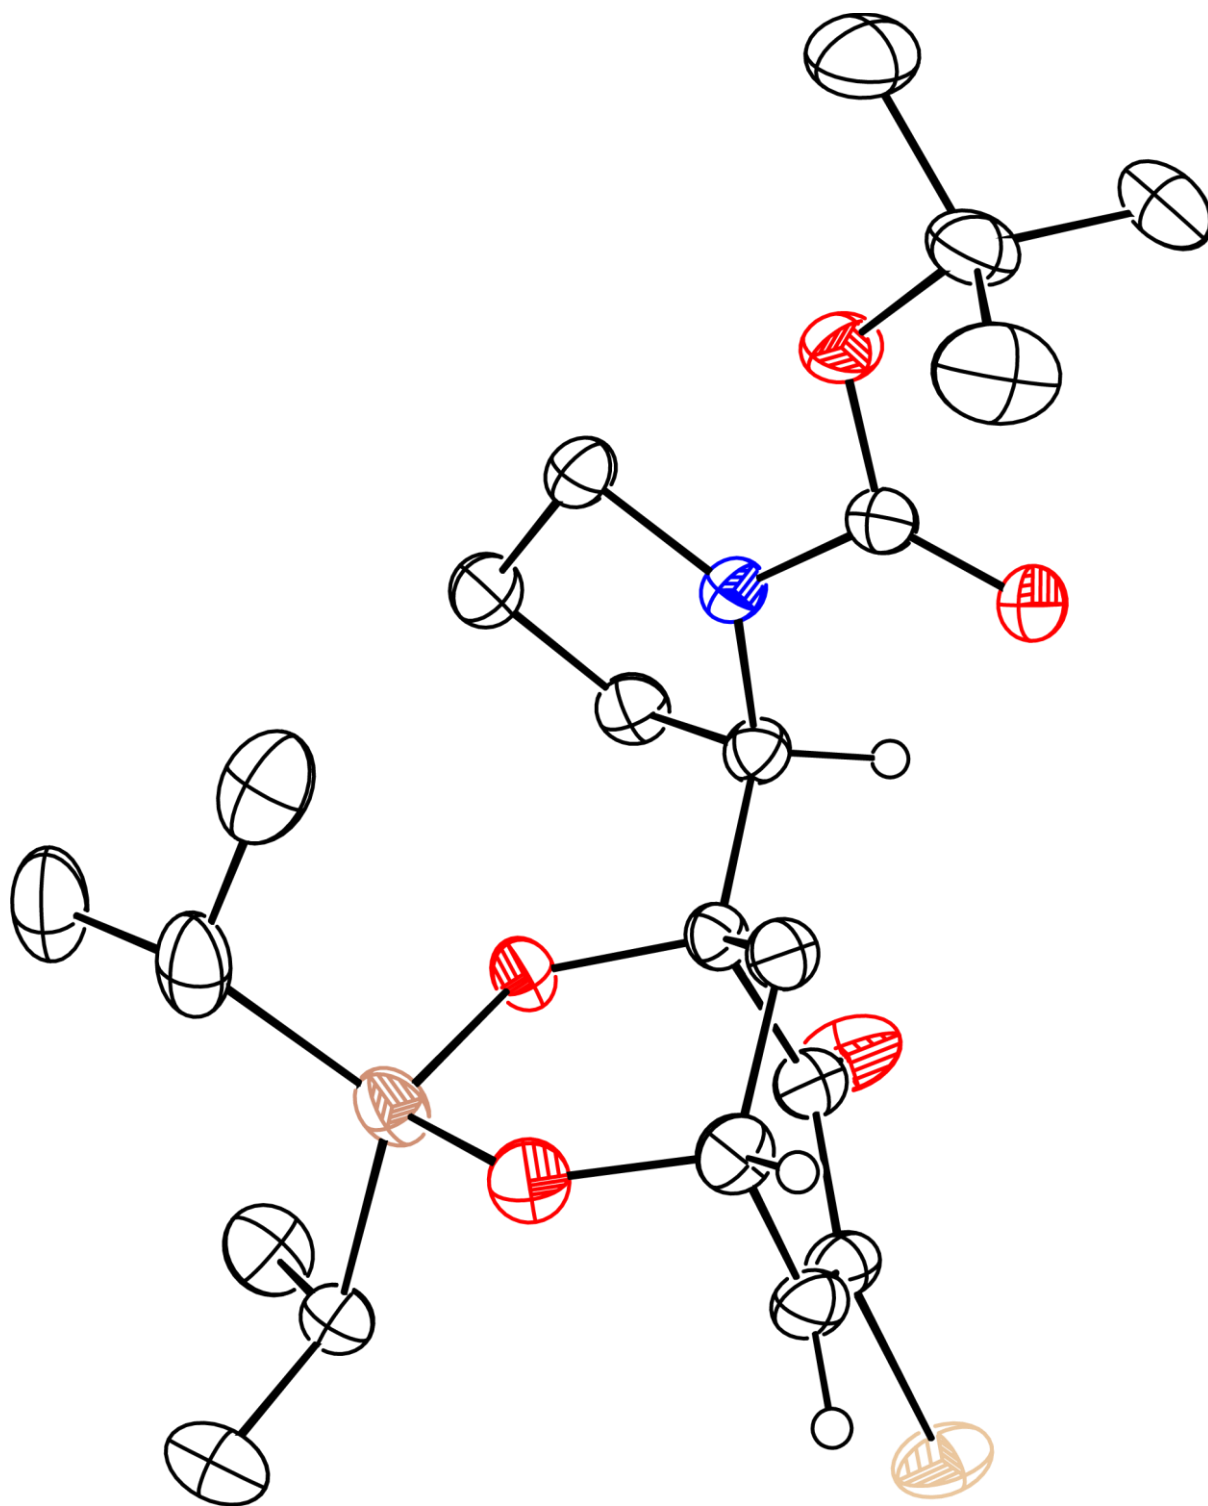

**Figure S2.** Thermal ellipsoid representation of 23

**Table S8.** Crystal data and structure refinement for **23**.

|                                   |                                                       |         |
|-----------------------------------|-------------------------------------------------------|---------|
| Empirical formula                 | C <sub>21</sub> H <sub>34</sub> I N O <sub>5</sub> Si |         |
| Formula weight                    | 535.48                                                |         |
| Temperature                       | 2035(2) K                                             |         |
| Wavelength                        | 0.71073 Å                                             |         |
| Crystal system                    | Orthorhombic                                          |         |
| Space group                       | P2 <sub>1</sub> 2 <sub>1</sub> 2 <sub>1</sub>         |         |
| Unit cell dimensions              | a = 8.9672(4) Å                                       | α = 90° |
|                                   | b = 14.2728(6) Å                                      | β = 90° |
|                                   | c = 19.4271(9) Å                                      | γ = 90° |
| Volume                            | 2486.42(19) Å <sup>3</sup>                            |         |
| Z                                 | 4                                                     |         |
| Density (calculated)              | 1.430 Mg/m <sup>3</sup>                               |         |
| Absorption coefficient            | 1.365 mm <sup>-1</sup>                                |         |
| F(000)                            | 1096                                                  |         |
| Crystal size                      | 0.283 x 0.269 x 0.117 mm <sup>3</sup>                 |         |
| Theta range for data collection   | 2.536 to 27.591°.                                     |         |
| Index ranges                      | -11 ≤ h ≤ 10, -18 ≤ k ≤ 18, -25 ≤ l ≤ 21              |         |
| Reflections collected             | 34500                                                 |         |
| Independent reflections           | 5717 [R(int) = 0.0548]                                |         |
| Completeness to theta = 25.242°   | 99.2 %                                                |         |
| Absorption correction             | Semi-empirical from equivalents                       |         |
| Max. and min. transmission        | 0.7456 and 0.5621                                     |         |
| Refinement method                 | Full-matrix least-squares on F <sup>2</sup>           |         |
| Data / restraints / parameters    | 5717 / 0 / 302                                        |         |
| Goodness-of-fit on F <sup>2</sup> | 1.070                                                 |         |
| Final R indices [I > 2σ(I)]       | R1 = 0.0256, wR2 = 0.0530                             |         |
| R indices (all data)              | R1 = 0.0333, wR2 = 0.0569                             |         |
| Absolute structure parameter      | -0.020(8)                                             |         |
| Largest diff. peak and hole       | 0.178 and -0.476 e·Å <sup>-3</sup>                    |         |

**Table S9.** Atomic coordinates (  $\times 10^4$  ) and equivalent isotropic displacement parameters (  $\text{\AA}^2 \times 10^3$  ) for **23**. U(eq) is defined as one third of the trace of the orthogonalized  $U^{ij}$  tensor.

|        | x        | y        | z        | U(eq)  |
|--------|----------|----------|----------|--------|
| O(1)   | 7339(3)  | 6752(2)  | 6771(2)  | 56(1)  |
| C(2)   | 6404(4)  | 6904(2)  | 6337(2)  | 35(1)  |
| C(3)   | 5912(4)  | 7867(2)  | 6158(2)  | 36(1)  |
| I(4)   | 6850(1)  | 8950(1)  | 6745(1)  | 56(1)  |
| C(5)   | 4946(4)  | 8049(2)  | 5658(2)  | 37(1)  |
| C(6)   | 4289(4)  | 7285(2)  | 5224(2)  | 36(1)  |
| C(7)   | 5263(4)  | 6413(2)  | 5219(2)  | 33(1)  |
| C(8)   | 5602(3)  | 6101(2)  | 5949(1)  | 29(1)  |
| O(9)   | 4234(2)  | 5941(2)  | 6320(1)  | 33(1)  |
| O(10)  | 2809(2)  | 7082(2)  | 5470(1)  | 40(1)  |
| Si(11) | 2598(1)  | 6431(1)  | 6168(1)  | 39(1)  |
| C(12)  | 2259(12) | 7268(7)  | 6937(3)  | 41(2)  |
| C(13)  | 2480(20) | 6732(18) | 7606(7)  | 53(3)  |
| C(14)  | 810(13)  | 7789(7)  | 6863(4)  | 61(3)  |
| C(12B) | 1722(19) | 6951(10) | 6904(6)  | 36(3)  |
| C(13B) | 2540(50) | 6890(40) | 7620(20) | 90(16) |
| C(14B) | 1720(30) | 8047(9)  | 6821(7)  | 58(5)  |
| C(15)  | 1191(4)  | 5523(3)  | 5949(2)  | 54(1)  |
| C(16)  | 1676(5)  | 4923(3)  | 5334(2)  | 61(1)  |
| C(17)  | 738(5)   | 4900(3)  | 6558(3)  | 68(1)  |
| C(18)  | 6594(3)  | 5217(2)  | 6001(2)  | 32(1)  |
| C(19)  | 6398(3)  | 4664(2)  | 6670(2)  | 37(1)  |
| C(20)  | 5264(4)  | 3900(2)  | 6490(2)  | 39(1)  |
| C(21)  | 5634(4)  | 3641(2)  | 5753(2)  | 39(1)  |
| N(22)  | 6259(3)  | 4513(2)  | 5468(1)  | 33(1)  |
| C(23)  | 7005(4)  | 4531(2)  | 4862(2)  | 36(1)  |
| O(24)  | 7796(3)  | 5177(2)  | 4672(1)  | 46(1)  |
| O(25)  | 6736(3)  | 3745(1)  | 4503(1)  | 44(1)  |
| C(26)  | 7180(5)  | 3668(2)  | 3772(2)  | 48(1)  |
| C(27)  | 6416(6)  | 4429(3)  | 3359(2)  | 70(1)  |
| C(28)  | 8869(5)  | 3697(3)  | 3706(3)  | 68(1)  |
| C(29)  | 6596(6)  | 2705(3)  | 3588(2)  | 64(1)  |



**Table S10.** Bond lengths [ $\text{\AA}$ ] and angles [ $^\circ$ ] for **23**.

---

|               |           |
|---------------|-----------|
| O(1)-C(2)     | 1.208(4)  |
| C(2)-C(3)     | 1.485(4)  |
| C(2)-C(8)     | 1.549(4)  |
| C(3)-C(5)     | 1.328(5)  |
| C(3)-I(4)     | 2.097(3)  |
| C(5)-C(6)     | 1.499(5)  |
| C(5)-H(5)     | 0.9300    |
| C(6)-O(10)    | 1.440(4)  |
| C(6)-C(7)     | 1.520(4)  |
| C(6)-H(6)     | 0.9800    |
| C(7)-C(8)     | 1.518(4)  |
| C(7)-H(7A)    | 0.9700    |
| C(7)-H(7B)    | 0.9700    |
| C(8)-O(9)     | 1.441(3)  |
| C(8)-C(18)    | 1.548(4)  |
| O(9)-Si(11)   | 1.651(2)  |
| O(10)-Si(11)  | 1.655(2)  |
| Si(11)-C(12B) | 1.793(12) |
| Si(11)-C(15)  | 1.858(4)  |
| Si(11)-C(12)  | 1.937(7)  |
| C(12)-C(14)   | 1.504(12) |
| C(12)-C(13)   | 1.521(19) |
| C(12)-H(12)   | 0.9800    |
| C(13)-H(13A)  | 0.9600    |
| C(13)-H(13B)  | 0.9600    |
| C(13)-H(13C)  | 0.9600    |
| C(14)-H(14A)  | 0.9600    |
| C(14)-H(14B)  | 0.9600    |
| C(14)-H(14C)  | 0.9600    |
| C(12B)-C(14B) | 1.57(2)   |
| C(12B)-C(13B) | 1.58(4)   |
| C(12B)-H(12B) | 0.9800    |
| C(13B)-H(13D) | 0.9600    |
| C(13B)-H(13E) | 0.9600    |
| C(13B)-H(13F) | 0.9600    |
| C(14B)-H(14D) | 0.9600    |

|               |          |
|---------------|----------|
| C(14B)-H(14E) | 0.9600   |
| C(14B)-H(14F) | 0.9600   |
| C(15)-C(16)   | 1.533(6) |
| C(15)-C(17)   | 1.535(6) |
| C(15)-H(15)   | 0.9800   |
| C(16)-H(16A)  | 0.9600   |
| C(16)-H(16B)  | 0.9600   |
| C(16)-H(16C)  | 0.9600   |
| C(17)-H(17A)  | 0.9600   |
| C(17)-H(17B)  | 0.9600   |
| C(17)-H(17C)  | 0.9600   |
| C(18)-N(22)   | 1.472(4) |
| C(18)-C(19)   | 1.532(4) |
| C(18)-H(18)   | 1.04(4)  |
| C(19)-C(20)   | 1.531(5) |
| C(19)-H(19A)  | 0.9700   |
| C(19)-H(19B)  | 0.9700   |
| C(20)-C(21)   | 1.515(5) |
| C(20)-H(20A)  | 0.9700   |
| C(20)-H(20B)  | 0.9700   |
| C(21)-N(22)   | 1.473(4) |
| C(21)-H(21A)  | 0.9700   |
| C(21)-H(21B)  | 0.9700   |
| N(22)-C(23)   | 1.355(4) |
| C(23)-O(24)   | 1.219(4) |
| C(23)-O(25)   | 1.344(4) |
| O(25)-C(26)   | 1.478(4) |
| C(26)-C(29)   | 1.514(5) |
| C(26)-C(27)   | 1.514(6) |
| C(26)-C(28)   | 1.521(6) |
| C(27)-H(27A)  | 0.9600   |
| C(27)-H(27B)  | 0.9600   |
| C(27)-H(27C)  | 0.9600   |
| C(28)-H(28A)  | 0.9600   |
| C(28)-H(28B)  | 0.9600   |
| C(28)-H(28C)  | 0.9600   |
| C(29)-H(29A)  | 0.9600   |
| C(29)-H(29B)  | 0.9600   |

|                     |            |
|---------------------|------------|
| C(29)-H(29C)        | 0.9600     |
| O(1)-C(2)-C(3)      | 122.4(3)   |
| O(1)-C(2)-C(8)      | 121.9(3)   |
| C(3)-C(2)-C(8)      | 115.6(3)   |
| C(5)-C(3)-C(2)      | 123.1(3)   |
| C(5)-C(3)-I(4)      | 121.0(2)   |
| C(2)-C(3)-I(4)      | 115.8(2)   |
| C(3)-C(5)-C(6)      | 121.7(3)   |
| C(3)-C(5)-H(5)      | 119.1      |
| C(6)-C(5)-H(5)      | 119.1      |
| O(10)-C(6)-C(5)     | 108.8(3)   |
| O(10)-C(6)-C(7)     | 111.6(2)   |
| C(5)-C(6)-C(7)      | 111.9(3)   |
| O(10)-C(6)-H(6)     | 108.1      |
| C(5)-C(6)-H(6)      | 108.1      |
| C(7)-C(6)-H(6)      | 108.1      |
| C(8)-C(7)-C(6)      | 110.4(3)   |
| C(8)-C(7)-H(7A)     | 109.6      |
| C(6)-C(7)-H(7A)     | 109.6      |
| C(8)-C(7)-H(7B)     | 109.6      |
| C(6)-C(7)-H(7B)     | 109.6      |
| H(7A)-C(7)-H(7B)    | 108.1      |
| O(9)-C(8)-C(7)      | 110.1(2)   |
| O(9)-C(8)-C(18)     | 109.1(2)   |
| C(7)-C(8)-C(18)     | 114.5(2)   |
| O(9)-C(8)-C(2)      | 105.6(2)   |
| C(7)-C(8)-C(2)      | 109.3(2)   |
| C(18)-C(8)-C(2)     | 107.8(2)   |
| C(8)-O(9)-Si(11)    | 126.85(17) |
| C(6)-O(10)-Si(11)   | 119.29(18) |
| O(9)-Si(11)-O(10)   | 106.45(11) |
| O(9)-Si(11)-C(12B)  | 115.0(5)   |
| O(10)-Si(11)-C(12B) | 118.1(4)   |
| O(9)-Si(11)-C(15)   | 110.44(15) |
| O(10)-Si(11)-C(15)  | 106.36(16) |
| C(12B)-Si(11)-C(15) | 100.0(6)   |
| O(9)-Si(11)-C(12)   | 105.2(3)   |

|                      |           |
|----------------------|-----------|
| O(10)-Si(11)-C(12)   | 107.7(3)  |
| C(15)-Si(11)-C(12)   | 120.0(4)  |
| C(14)-C(12)-C(13)    | 116.4(10) |
| C(14)-C(12)-Si(11)   | 111.5(7)  |
| C(13)-C(12)-Si(11)   | 109.2(10) |
| C(14)-C(12)-H(12)    | 106.4     |
| C(13)-C(12)-H(12)    | 106.4     |
| Si(11)-C(12)-H(12)   | 106.4     |
| C(12)-C(13)-H(13A)   | 109.5     |
| C(12)-C(13)-H(13B)   | 109.5     |
| H(13A)-C(13)-H(13B)  | 109.5     |
| C(12)-C(13)-H(13C)   | 109.5     |
| H(13A)-C(13)-H(13C)  | 109.5     |
| H(13B)-C(13)-H(13C)  | 109.5     |
| C(12)-C(14)-H(14A)   | 109.5     |
| C(12)-C(14)-H(14B)   | 109.5     |
| H(14A)-C(14)-H(14B)  | 109.5     |
| C(12)-C(14)-H(14C)   | 109.5     |
| H(14A)-C(14)-H(14C)  | 109.5     |
| H(14B)-C(14)-H(14C)  | 109.5     |
| C(14B)-C(12B)-C(13B) | 98(3)     |
| C(14B)-C(12B)-Si(11) | 109.3(12) |
| C(13B)-C(12B)-Si(11) | 118.7(19) |
| C(14B)-C(12B)-H(12B) | 109.9     |
| C(13B)-C(12B)-H(12B) | 109.9     |
| Si(11)-C(12B)-H(12B) | 109.9     |
| C(12B)-C(13B)-H(13D) | 109.5     |
| C(12B)-C(13B)-H(13E) | 109.5     |
| H(13D)-C(13B)-H(13E) | 109.5     |
| C(12B)-C(13B)-H(13F) | 109.5     |
| H(13D)-C(13B)-H(13F) | 109.5     |
| H(13E)-C(13B)-H(13F) | 109.5     |
| C(12B)-C(14B)-H(14D) | 109.5     |
| C(12B)-C(14B)-H(14E) | 109.5     |
| H(14D)-C(14B)-H(14E) | 109.5     |
| C(12B)-C(14B)-H(14F) | 109.5     |
| H(14D)-C(14B)-H(14F) | 109.5     |
| H(14E)-C(14B)-H(14F) | 109.5     |

|                     |          |
|---------------------|----------|
| C(16)-C(15)-C(17)   | 110.6(4) |
| C(16)-C(15)-Si(11)  | 112.1(3) |
| C(17)-C(15)-Si(11)  | 114.1(3) |
| C(16)-C(15)-H(15)   | 106.6    |
| C(17)-C(15)-H(15)   | 106.6    |
| Si(11)-C(15)-H(15)  | 106.6    |
| C(15)-C(16)-H(16A)  | 109.5    |
| C(15)-C(16)-H(16B)  | 109.5    |
| H(16A)-C(16)-H(16B) | 109.5    |
| C(15)-C(16)-H(16C)  | 109.5    |
| H(16A)-C(16)-H(16C) | 109.5    |
| H(16B)-C(16)-H(16C) | 109.5    |
| C(15)-C(17)-H(17A)  | 109.5    |
| C(15)-C(17)-H(17B)  | 109.5    |
| H(17A)-C(17)-H(17B) | 109.5    |
| C(15)-C(17)-H(17C)  | 109.5    |
| H(17A)-C(17)-H(17C) | 109.5    |
| H(17B)-C(17)-H(17C) | 109.5    |
| N(22)-C(18)-C(19)   | 102.8(2) |
| N(22)-C(18)-C(8)    | 113.2(2) |
| C(19)-C(18)-C(8)    | 114.1(2) |
| N(22)-C(18)-H(18)   | 110(2)   |
| C(19)-C(18)-H(18)   | 112(2)   |
| C(8)-C(18)-H(18)    | 105(2)   |
| C(20)-C(19)-C(18)   | 104.4(3) |
| C(20)-C(19)-H(19A)  | 110.9    |
| C(18)-C(19)-H(19A)  | 110.9    |
| C(20)-C(19)-H(19B)  | 110.9    |
| C(18)-C(19)-H(19B)  | 110.9    |
| H(19A)-C(19)-H(19B) | 108.9    |
| C(21)-C(20)-C(19)   | 104.1(3) |
| C(21)-C(20)-H(20A)  | 110.9    |
| C(19)-C(20)-H(20A)  | 110.9    |
| C(21)-C(20)-H(20B)  | 110.9    |
| C(19)-C(20)-H(20B)  | 110.9    |
| H(20A)-C(20)-H(20B) | 108.9    |
| N(22)-C(21)-C(20)   | 103.4(2) |
| N(22)-C(21)-H(21A)  | 111.1    |

|                     |          |
|---------------------|----------|
| C(20)-C(21)-H(21A)  | 111.1    |
| N(22)-C(21)-H(21B)  | 111.1    |
| C(20)-C(21)-H(21B)  | 111.1    |
| H(21A)-C(21)-H(21B) | 109.0    |
| C(23)-N(22)-C(18)   | 119.8(3) |
| C(23)-N(22)-C(21)   | 122.1(2) |
| C(18)-N(22)-C(21)   | 112.9(2) |
| O(24)-C(23)-O(25)   | 125.3(3) |
| O(24)-C(23)-N(22)   | 124.4(3) |
| O(25)-C(23)-N(22)   | 110.3(3) |
| C(23)-O(25)-C(26)   | 120.8(2) |
| O(25)-C(26)-C(29)   | 101.6(3) |
| O(25)-C(26)-C(27)   | 109.6(3) |
| C(29)-C(26)-C(27)   | 111.7(4) |
| O(25)-C(26)-C(28)   | 110.3(4) |
| C(29)-C(26)-C(28)   | 110.4(3) |
| C(27)-C(26)-C(28)   | 112.7(4) |
| C(26)-C(27)-H(27A)  | 109.5    |
| C(26)-C(27)-H(27B)  | 109.5    |
| H(27A)-C(27)-H(27B) | 109.5    |
| C(26)-C(27)-H(27C)  | 109.5    |
| H(27A)-C(27)-H(27C) | 109.5    |
| H(27B)-C(27)-H(27C) | 109.5    |
| C(26)-C(28)-H(28A)  | 109.5    |
| C(26)-C(28)-H(28B)  | 109.5    |
| H(28A)-C(28)-H(28B) | 109.5    |
| C(26)-C(28)-H(28C)  | 109.5    |
| H(28A)-C(28)-H(28C) | 109.5    |
| H(28B)-C(28)-H(28C) | 109.5    |
| C(26)-C(29)-H(29A)  | 109.5    |
| C(26)-C(29)-H(29B)  | 109.5    |
| H(29A)-C(29)-H(29B) | 109.5    |
| C(26)-C(29)-H(29C)  | 109.5    |
| H(29A)-C(29)-H(29C) | 109.5    |
| H(29B)-C(29)-H(29C) | 109.5    |

---

Symmetry transformations used to generate equivalent atoms:

**Table S11.** Anisotropic displacement parameters ( $\text{\AA}^2 \times 10^3$ ) for **23**. The anisotropic displacement factor exponent takes the form:  $-2\pi^2 [ h^2 a^{*2} U^{11} + \dots + 2 h k a^* b^* U^{12} ]$

|        | U <sup>11</sup> | U <sup>22</sup> | U <sup>33</sup> | U <sup>23</sup> | U <sup>13</sup> | U <sup>12</sup> |
|--------|-----------------|-----------------|-----------------|-----------------|-----------------|-----------------|
| O(1)   | 72(2)           | 40(1)           | 57(2)           | -1(1)           | -31(2)          | -2(1)           |
| C(2)   | 43(2)           | 34(2)           | 27(2)           | 0(1)            | 0(1)            | -1(1)           |
| C(3)   | 48(2)           | 29(1)           | 31(2)           | -2(1)           | 3(1)            | -2(1)           |
| I(4)   | 84(1)           | 37(1)           | 46(1)           | -10(1)          | -5(1)           | -5(1)           |
| C(5)   | 49(2)           | 29(1)           | 34(2)           | 7(1)            | 6(1)            | 2(1)            |
| C(6)   | 43(2)           | 36(2)           | 29(2)           | 10(1)           | -1(1)           | 2(1)            |
| C(7)   | 38(2)           | 33(1)           | 28(2)           | 0(1)            | 2(1)            | 0(1)            |
| C(8)   | 30(1)           | 31(1)           | 25(1)           | 3(1)            | 2(1)            | 2(1)            |
| O(9)   | 30(1)           | 37(1)           | 31(1)           | 10(1)           | 4(1)            | 6(1)            |
| O(10)  | 39(1)           | 42(1)           | 40(1)           | 12(1)           | -3(1)           | 6(1)            |
| Si(11) | 36(1)           | 43(1)           | 37(1)           | 11(1)           | 5(1)            | 12(1)           |
| C(12)  | 41(4)           | 37(4)           | 44(3)           | -4(3)           | 8(3)            | 1(3)            |
| C(13)  | 61(8)           | 66(7)           | 33(5)           | 0(4)            | 2(5)            | 5(5)            |
| C(14)  | 59(6)           | 59(4)           | 65(5)           | -10(4)          | 3(4)            | 19(4)           |
| C(12B) | 37(7)           | 21(5)           | 49(6)           | -3(4)           | 2(5)            | -11(5)          |
| C(13B) | 80(20)          | 80(20)          | 110(30)         | -9(15)          | -34(17)         | 20(15)          |
| C(14B) | 79(13)          | 43(6)           | 50(7)           | -10(5)          | 5(9)            | 4(7)            |
| C(15)  | 31(2)           | 62(2)           | 68(3)           | 26(2)           | -1(2)           | 4(2)            |
| C(16)  | 57(2)           | 65(2)           | 60(2)           | 13(2)           | -16(2)          | -13(2)          |
| C(17)  | 44(2)           | 76(3)           | 83(3)           | 30(2)           | 11(2)           | -2(2)           |
| C(18)  | 31(2)           | 30(1)           | 34(2)           | 0(1)            | -2(1)           | -1(1)           |
| C(19)  | 37(2)           | 37(2)           | 38(2)           | 6(1)            | -4(1)           | 6(1)            |
| C(20)  | 45(2)           | 36(2)           | 37(2)           | 10(1)           | 4(1)            | 3(2)            |
| C(21)  | 45(2)           | 30(1)           | 41(2)           | 4(1)            | 6(2)            | -4(1)           |
| N(22)  | 38(1)           | 26(1)           | 35(1)           | 2(1)            | 6(1)            | -2(1)           |
| C(23)  | 40(2)           | 29(1)           | 40(2)           | 0(1)            | 9(2)            | 3(1)            |
| O(24)  | 52(2)           | 37(1)           | 49(1)           | 0(1)            | 20(1)           | -5(1)           |
| O(25)  | 64(2)           | 33(1)           | 35(1)           | -4(1)           | 14(1)           | -4(1)           |
| C(26)  | 65(3)           | 41(2)           | 39(2)           | -2(1)           | 14(2)           | 11(2)           |
| C(27)  | 103(4)          | 60(2)           | 46(2)           | 7(2)            | 0(2)            | 18(2)           |
| C(28)  | 66(3)           | 62(3)           | 76(3)           | -10(2)          | 32(2)           | 13(2)           |
| C(29)  | 94(3)           | 53(2)           | 46(2)           | -14(2)          | 7(2)            | -2(2)           |

**Table S12.** Hydrogen coordinates (  $\times 10^4$  ) and isotropic displacement parameters (  $\text{\AA}^2 \times 10^3$  ) for **23**.

|        | x        | y        | z        | U(eq) |
|--------|----------|----------|----------|-------|
| H(5)   | 4670     | 8667     | 5574     | 45    |
| H(6)   | 4209     | 7516     | 4751     | 43    |
| H(7A)  | 4755     | 5914     | 4975     | 40    |
| H(7B)  | 6188     | 6546     | 4979     | 40    |
| H(12)  | 3051     | 7740     | 6919     | 49    |
| H(13A) | 2351     | 7150     | 7989     | 80    |
| H(13B) | 3469     | 6473     | 7617     | 80    |
| H(13C) | 1763     | 6234     | 7634     | 80    |
| H(14A) | 722      | 8241     | 7226     | 92    |
| H(14B) | -5       | 7354     | 6888     | 92    |
| H(14C) | 789      | 8103     | 6426     | 92    |
| H(12B) | 696      | 6722     | 6947     | 43    |
| H(13D) | 1982     | 7239     | 7959     | 135   |
| H(13E) | 3522     | 7144     | 7583     | 135   |
| H(13F) | 2597     | 6245     | 7764     | 135   |
| H(14D) | 1257     | 8327     | 7216     | 86    |
| H(14E) | 1173     | 8214     | 6414     | 86    |
| H(14F) | 2727     | 8267     | 6782     | 86    |
| H(15)  | 290      | 5859     | 5805     | 64    |
| H(16A) | 893      | 4492     | 5218     | 92    |
| H(16B) | 2560     | 4579     | 5453     | 92    |
| H(16C) | 1880     | 5320     | 4947     | 92    |
| H(17A) | 49       | 4430     | 6403     | 102   |
| H(17B) | 273      | 5277     | 6906     | 102   |
| H(17C) | 1608     | 4603     | 6745     | 102   |
| H(18)  | 7680(40) | 5460(30) | 5940(20) | 47    |
| H(19A) | 7336     | 4390     | 6816     | 45    |
| H(19B) | 6022     | 5064     | 7035     | 45    |
| H(20A) | 5373     | 3363     | 6792     | 47    |
| H(20B) | 4253     | 4136     | 6526     | 47    |
| H(21A) | 6359     | 3137     | 5736     | 46    |
| H(21B) | 4746     | 3452     | 5504     | 46    |



|        |      |      |      |     |
|--------|------|------|------|-----|
| H(27A) | 6609 | 4333 | 2878 | 105 |
| H(27B) | 6793 | 5030 | 3496 | 105 |
| H(27C) | 5360 | 4405 | 3440 | 105 |
| H(28A) | 9152 | 3508 | 3250 | 103 |
| H(28B) | 9306 | 3278 | 4036 | 103 |
| H(28C) | 9216 | 4323 | 3790 | 103 |
| H(29A) | 6824 | 2571 | 3115 | 96  |
| H(29B) | 5535 | 2689 | 3654 | 96  |
| H(29C) | 7059 | 2245 | 3878 | 96  |

---

### 4.3 X-ray Crystal Structure of Compound 28

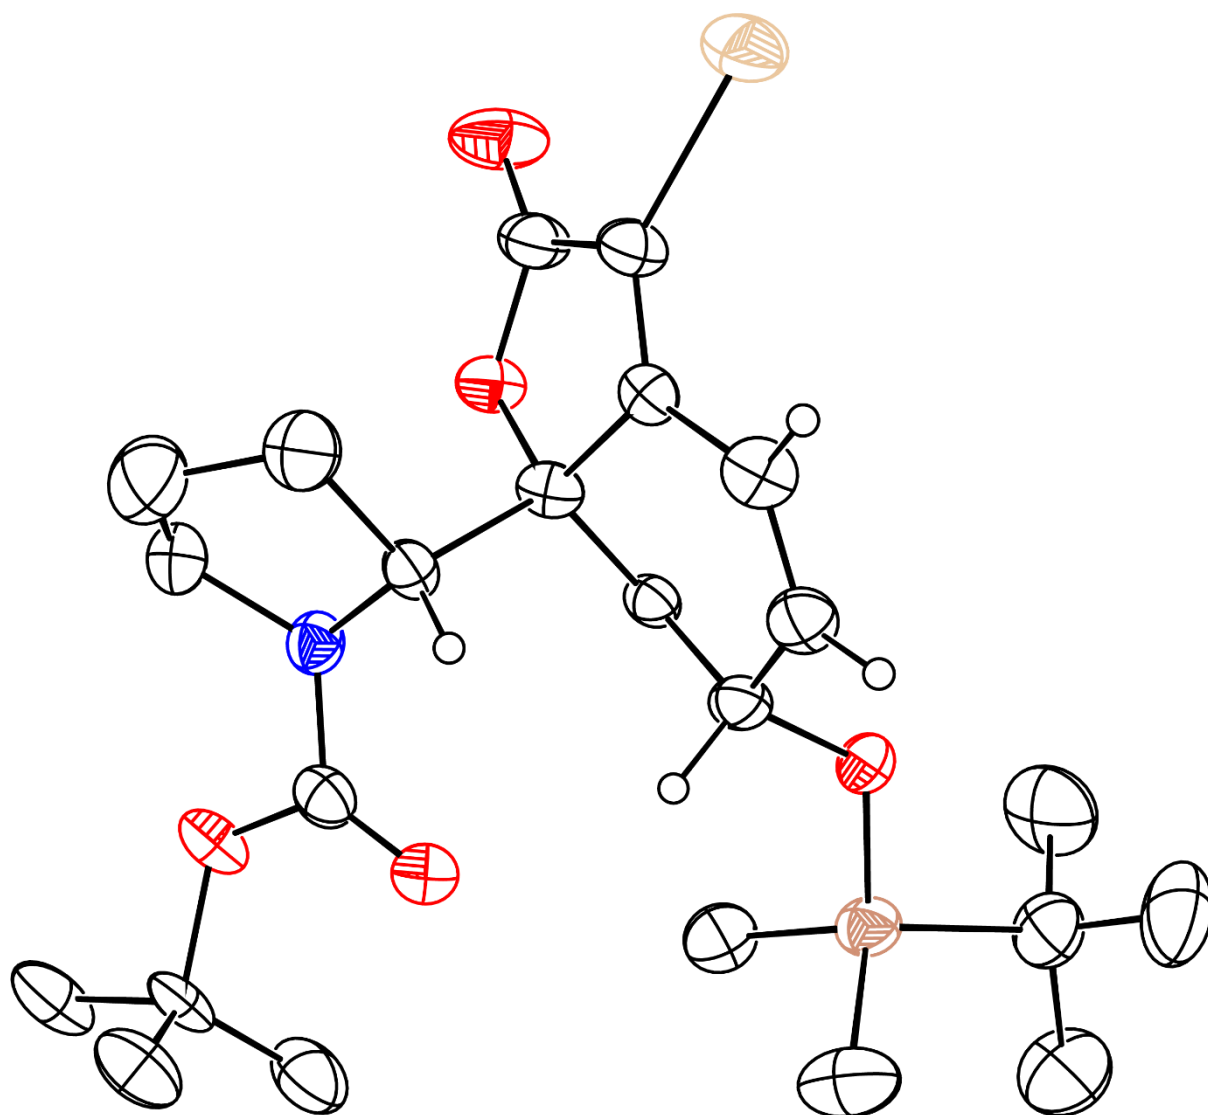

**Figure S3.** Thermal ellipsoid representation of **28**

**Table S13.** Crystal data and structure refinement for **28**.

|                                   |                                                      |         |
|-----------------------------------|------------------------------------------------------|---------|
| Empirical formula                 | C <sub>23</sub> H <sub>35</sub> IN O <sub>5</sub> Si |         |
| Formula weight                    | 560.51                                               |         |
| Temperature                       | 253(2) K                                             |         |
| Wavelength                        | 0.71073 Å                                            |         |
| Crystal system                    | Orthorhombic                                         |         |
| Space group                       | P2 <sub>1</sub> 2 <sub>1</sub> 2                     |         |
| Unit cell dimensions              | a = 8.5047(19) Å                                     | α = 90° |
|                                   | b = 46.069(10) Å                                     | β = 90° |
|                                   | c = 6.8117(16) Å                                     | γ = 90° |
| Volume                            | 2668.9(10) Å <sup>3</sup>                            |         |
| Z                                 | 4                                                    |         |
| Density (calculated)              | 1.395 Mg/m <sup>3</sup>                              |         |
| Absorption coefficient            | 1.275 mm <sup>-1</sup>                               |         |
| F(000)                            | 1148                                                 |         |
| Crystal size                      | 0.221 x 0.041 x 0.038 mm <sup>3</sup>                |         |
| Theta range for data collection   | 2.435 to 26.070°.                                    |         |
| Index ranges                      | -10 ≤ h ≤ 9, -53 ≤ k ≤ 56, -8 ≤ l ≤ 8                |         |
| Reflections collected             | 33699                                                |         |
| Independent reflections           | 5114 [R(int) = 0.1109]                               |         |
| Completeness to theta = 25.242°   | 99.4 %                                               |         |
| Absorption correction             | Semi-empirical from equivalents                      |         |
| Max. and min. transmission        | 0.7453 and 0.5410                                    |         |
| Refinement method                 | Full-matrix least-squares on F <sup>2</sup>          |         |
| Data / restraints / parameters    | 5114 / 437 / 288                                     |         |
| Goodness-of-fit on F <sup>2</sup> | 1.198                                                |         |
| Final R indices [I > 2σ(I)]       | R1 = 0.0849, wR2 = 0.1419                            |         |
| R indices (all data)              | R1 = 0.1205, wR2 = 0.1550                            |         |
| Absolute structure parameter      | 0.24(6)                                              |         |
| Largest diff. peak and hole       | 0.974 and -0.710 e·Å <sup>-3</sup>                   |         |

**Table S14.** Atomic coordinates (  $\times 10^4$  ) and equivalent isotropic displacement parameters (  $\text{\AA}^2 \times 10^3$  ) for **28**. U(eq) is defined as one third of the trace of the orthogonalized  $U^{ij}$  tensor.

|        | x         | y       | z         | U(eq)  |
|--------|-----------|---------|-----------|--------|
| O(1)   | 4832(9)   | 5624(2) | 5498(11)  | 46(2)  |
| O(2)   | 3184(12)  | 5246(2) | 5823(16)  | 80(3)  |
| C(3)   | 3946(15)  | 5429(3) | 6569(19)  | 54(3)  |
| C(4)   | 4149(14)  | 5504(3) | 8653(18)  | 51(3)  |
| I(5)   | 2944(1)   | 5289(1) | 10836(2)  | 79(1)  |
| C(6)   | 5062(12)  | 5735(2) | 8797(16)  | 38(2)  |
| C(7)   | 5393(13)  | 5925(3) | 10444(17) | 48(3)  |
| C(8)   | 5722(14)  | 6205(3) | 10082(19) | 50(3)  |
| C(9)   | 5796(13)  | 6334(2) | 8061(19)  | 46(3)  |
| C(10)  | 5167(12)  | 6132(2) | 6487(16)  | 38(2)  |
| C(11)  | 5644(12)  | 5818(2) | 6814(16)  | 38(2)  |
| O(12)  | 4892(9)   | 6598(2) | 8068(13)  | 52(2)  |
| Si(13) | 5429(4)   | 6905(1) | 7004(6)   | 50(1)  |
| C(14)  | 5729(18)  | 6850(3) | 4340(30)  | 72(4)  |
| C(15)  | 7290(18)  | 7037(3) | 8100(30)  | 87(5)  |
| C(16)  | 3763(18)  | 7156(3) | 7530(20)  | 71(4)  |
| C(17)  | 4100(20)  | 7460(4) | 6620(30)  | 111(7) |
| C(18)  | 2253(19)  | 7039(4) | 6540(30)  | 108(6) |
| C(19)  | 3500(20)  | 7187(4) | 9700(30)  | 104(6) |
| C(20)  | 7460(12)  | 5769(2) | 6546(17)  | 43(3)  |
| C(21)  | 7943(17)  | 5452(3) | 6970(20)  | 65(3)  |
| C(22)  | 8790(20)  | 5357(4) | 5200(30)  | 102(6) |
| C(23)  | 8317(17)  | 5550(3) | 3570(20)  | 68(4)  |
| N(24)  | 7955(11)  | 5823(2) | 4547(12)  | 43(2)  |
| C(25)  | 8729(12)  | 6081(3) | 4140(20)  | 46(2)  |
| O(26)  | 8749(10)  | 6285(2) | 5234(14)  | 59(2)  |
| O(27)  | 9370(9)   | 6068(2) | 2342(13)  | 57(2)  |
| C(28)  | 10554(13) | 6292(3) | 1760(19)  | 52(3)  |
| C(29)  | 11909(16) | 6277(3) | 3150(20)  | 73(4)  |
| C(30)  | 9783(18)  | 6589(3) | 1670(30)  | 80(5)  |
| C(31)  | 11018(17) | 6189(4) | -280(20)  | 79(4)  |

**Table S15.** Bond lengths [ $\text{\AA}$ ] and angles [ $^\circ$ ] for **28**.

---

|              |           |
|--------------|-----------|
| O(1)-C(3)    | 1.382(14) |
| O(1)-C(11)   | 1.443(13) |
| O(2)-C(3)    | 1.177(14) |
| C(3)-C(4)    | 1.472(18) |
| C(4)-C(6)    | 1.319(16) |
| C(4)-I(5)    | 2.061(11) |
| C(6)-C(7)    | 1.453(16) |
| C(6)-C(11)   | 1.489(16) |
| C(7)-C(8)    | 1.340(17) |
| C(7)-H(7)    | 0.9400    |
| C(8)-C(9)    | 1.502(17) |
| C(8)-H(8)    | 0.9400    |
| C(9)-O(12)   | 1.440(13) |
| C(9)-C(10)   | 1.518(16) |
| C(9)-H(9)    | 0.9900    |
| C(10)-C(11)  | 1.518(15) |
| C(10)-H(10A) | 0.9800    |
| C(10)-H(10B) | 0.9800    |
| C(11)-C(20)  | 1.572(15) |
| O(12)-Si(13) | 1.652(8)  |
| Si(13)-C(14) | 1.850(17) |
| Si(13)-C(15) | 1.853(15) |
| Si(13)-C(16) | 1.864(15) |
| C(14)-H(14A) | 0.9700    |
| C(14)-H(14B) | 0.9700    |
| C(14)-H(14C) | 0.9700    |
| C(15)-H(15A) | 0.9700    |
| C(15)-H(15B) | 0.9700    |
| C(15)-H(15C) | 0.9700    |
| C(16)-C(19)  | 1.50(2)   |
| C(16)-C(18)  | 1.55(2)   |
| C(16)-C(17)  | 1.56(2)   |
| C(17)-H(17A) | 0.9700    |
| C(17)-H(17B) | 0.9700    |
| C(17)-H(17C) | 0.9700    |

|                 |           |
|-----------------|-----------|
| C(18)-H(18A)    | 0.9700    |
| C(18)-H(18B)    | 0.9700    |
| C(18)-H(18C)    | 0.9700    |
| C(19)-H(19A)    | 0.9700    |
| C(19)-H(19B)    | 0.9700    |
| C(19)-H(19C)    | 0.9700    |
| C(20)-N(24)     | 1.447(14) |
| C(20)-C(21)     | 1.544(16) |
| C(20)-H(20)     | 0.9900    |
| C(21)-C(22)     | 1.47(2)   |
| C(21)-H(21A)    | 0.9800    |
| C(21)-H(21B)    | 0.9800    |
| C(22)-C(23)     | 1.48(2)   |
| C(22)-H(22A)    | 0.9800    |
| C(22)-H(22B)    | 0.9800    |
| C(23)-N(24)     | 1.457(15) |
| C(23)-H(23A)    | 0.9800    |
| C(23)-H(23B)    | 0.9800    |
| N(24)-C(25)     | 1.387(14) |
| C(25)-O(26)     | 1.202(14) |
| C(25)-O(27)     | 1.340(16) |
| O(27)-C(28)     | 1.497(14) |
| C(28)-C(29)     | 1.493(18) |
| C(28)-C(30)     | 1.52(2)   |
| C(28)-C(31)     | 1.520(19) |
| C(29)-H(29A)    | 0.9400    |
| C(29)-H(29B)    | 0.9400    |
| C(30)-H(30A)    | 0.9700    |
| C(30)-H(30B)    | 0.9700    |
| C(30)-H(30C)    | 0.9700    |
| C(31)-H(31A)    | 0.9700    |
| C(31)-H(31B)    | 0.9700    |
| C(31)-H(31C)    | 0.9700    |
| C(3)-O(1)-C(11) | 109.7(8)  |
| O(2)-C(3)-O(1)  | 122.5(12) |
| O(2)-C(3)-C(4)  | 130.5(12) |
| O(1)-C(3)-C(4)  | 107.0(10) |

|                     |           |
|---------------------|-----------|
| C(6)-C(4)-C(3)      | 109.3(10) |
| C(6)-C(4)-I(5)      | 128.8(9)  |
| C(3)-C(4)-I(5)      | 121.6(8)  |
| C(4)-C(6)-C(7)      | 131.2(11) |
| C(4)-C(6)-C(11)     | 109.7(10) |
| C(7)-C(6)-C(11)     | 118.7(9)  |
| C(8)-C(7)-C(6)      | 118.7(11) |
| C(8)-C(7)-H(7)      | 120.7     |
| C(6)-C(7)-H(7)      | 120.7     |
| C(7)-C(8)-C(9)      | 124.0(11) |
| C(7)-C(8)-H(8)      | 118.0     |
| C(9)-C(8)-H(8)      | 118.0     |
| O(12)-C(9)-C(8)     | 108.1(10) |
| O(12)-C(9)-C(10)    | 109.5(9)  |
| C(8)-C(9)-C(10)     | 112.9(9)  |
| O(12)-C(9)-H(9)     | 108.8     |
| C(8)-C(9)-H(9)      | 108.8     |
| C(10)-C(9)-H(9)     | 108.8     |
| C(11)-C(10)-C(9)    | 112.8(9)  |
| C(11)-C(10)-H(10A)  | 109.0     |
| C(9)-C(10)-H(10A)   | 109.0     |
| C(11)-C(10)-H(10B)  | 109.0     |
| C(9)-C(10)-H(10B)   | 109.0     |
| H(10A)-C(10)-H(10B) | 107.8     |
| O(1)-C(11)-C(6)     | 104.1(8)  |
| O(1)-C(11)-C(10)    | 111.8(8)  |
| C(6)-C(11)-C(10)    | 106.9(9)  |
| O(1)-C(11)-C(20)    | 107.9(9)  |
| C(6)-C(11)-C(20)    | 113.2(9)  |
| C(10)-C(11)-C(20)   | 112.6(9)  |
| C(9)-O(12)-Si(13)   | 125.0(7)  |
| O(12)-Si(13)-C(14)  | 110.6(6)  |
| O(12)-Si(13)-C(15)  | 109.8(6)  |
| C(14)-Si(13)-C(15)  | 108.9(8)  |
| O(12)-Si(13)-C(16)  | 103.6(6)  |
| C(14)-Si(13)-C(16)  | 112.2(7)  |
| C(15)-Si(13)-C(16)  | 111.6(7)  |
| Si(13)-C(14)-H(14A) | 109.5     |

|                     |           |
|---------------------|-----------|
| Si(13)-C(14)-H(14B) | 109.5     |
| H(14A)-C(14)-H(14B) | 109.5     |
| Si(13)-C(14)-H(14C) | 109.5     |
| H(14A)-C(14)-H(14C) | 109.5     |
| H(14B)-C(14)-H(14C) | 109.5     |
| Si(13)-C(15)-H(15A) | 109.5     |
| Si(13)-C(15)-H(15B) | 109.5     |
| H(15A)-C(15)-H(15B) | 109.5     |
| Si(13)-C(15)-H(15C) | 109.5     |
| H(15A)-C(15)-H(15C) | 109.5     |
| H(15B)-C(15)-H(15C) | 109.5     |
| C(19)-C(16)-C(18)   | 109.7(15) |
| C(19)-C(16)-C(17)   | 109.6(15) |
| C(18)-C(16)-C(17)   | 106.9(14) |
| C(19)-C(16)-Si(13)  | 111.2(11) |
| C(18)-C(16)-Si(13)  | 109.4(11) |
| C(17)-C(16)-Si(13)  | 109.9(12) |
| C(16)-C(17)-H(17A)  | 109.5     |
| C(16)-C(17)-H(17B)  | 109.5     |
| H(17A)-C(17)-H(17B) | 109.5     |
| C(16)-C(17)-H(17C)  | 109.5     |
| H(17A)-C(17)-H(17C) | 109.5     |
| H(17B)-C(17)-H(17C) | 109.5     |
| C(16)-C(18)-H(18A)  | 109.5     |
| C(16)-C(18)-H(18B)  | 109.5     |
| H(18A)-C(18)-H(18B) | 109.5     |
| C(16)-C(18)-H(18C)  | 109.5     |
| H(18A)-C(18)-H(18C) | 109.5     |
| H(18B)-C(18)-H(18C) | 109.5     |
| C(16)-C(19)-H(19A)  | 109.5     |
| C(16)-C(19)-H(19B)  | 109.5     |
| H(19A)-C(19)-H(19B) | 109.5     |
| C(16)-C(19)-H(19C)  | 109.5     |
| H(19A)-C(19)-H(19C) | 109.5     |
| H(19B)-C(19)-H(19C) | 109.5     |
| N(24)-C(20)-C(21)   | 105.1(9)  |
| N(24)-C(20)-C(11)   | 111.7(9)  |
| C(21)-C(20)-C(11)   | 112.2(9)  |



|                     |           |
|---------------------|-----------|
| N(24)-C(20)-H(20)   | 109.2     |
| C(21)-C(20)-H(20)   | 109.2     |
| C(11)-C(20)-H(20)   | 109.2     |
| C(22)-C(21)-C(20)   | 105.0(11) |
| C(22)-C(21)-H(21A)  | 110.7     |
| C(20)-C(21)-H(21A)  | 110.7     |
| C(22)-C(21)-H(21B)  | 110.7     |
| C(20)-C(21)-H(21B)  | 110.7     |
| H(21A)-C(21)-H(21B) | 108.8     |
| C(21)-C(22)-C(23)   | 107.6(12) |
| C(21)-C(22)-H(22A)  | 110.2     |
| C(23)-C(22)-H(22A)  | 110.2     |
| C(21)-C(22)-H(22B)  | 110.2     |
| C(23)-C(22)-H(22B)  | 110.2     |
| H(22A)-C(22)-H(22B) | 108.5     |
| N(24)-C(23)-C(22)   | 103.4(12) |
| N(24)-C(23)-H(23A)  | 111.1     |
| C(22)-C(23)-H(23A)  | 111.1     |
| N(24)-C(23)-H(23B)  | 111.1     |
| C(22)-C(23)-H(23B)  | 111.1     |
| H(23A)-C(23)-H(23B) | 109.0     |
| C(25)-N(24)-C(20)   | 118.5(10) |
| C(25)-N(24)-C(23)   | 123.1(10) |
| C(20)-N(24)-C(23)   | 110.0(9)  |
| O(26)-C(25)-O(27)   | 126.7(11) |
| O(26)-C(25)-N(24)   | 123.5(12) |
| O(27)-C(25)-N(24)   | 109.7(11) |
| C(25)-O(27)-C(28)   | 118.9(10) |
| C(29)-C(28)-O(27)   | 108.6(10) |
| C(29)-C(28)-C(30)   | 113.5(13) |
| O(27)-C(28)-C(30)   | 110.0(9)  |
| C(29)-C(28)-C(31)   | 111.5(11) |
| O(27)-C(28)-C(31)   | 101.6(11) |
| C(30)-C(28)-C(31)   | 111.0(13) |
| C(28)-C(29)-H(29A)  | 120.0     |
| C(28)-C(29)-H(29B)  | 120.0     |
| H(29A)-C(29)-H(29B) | 120.0     |
| C(28)-C(30)-H(30A)  | 109.5     |

|                     |       |
|---------------------|-------|
| C(28)-C(30)-H(30B)  | 109.5 |
| H(30A)-C(30)-H(30B) | 109.5 |
| C(28)-C(30)-H(30C)  | 109.5 |
| H(30A)-C(30)-H(30C) | 109.5 |
| H(30B)-C(30)-H(30C) | 109.5 |
| C(28)-C(31)-H(31A)  | 109.5 |
| C(28)-C(31)-H(31B)  | 109.5 |
| H(31A)-C(31)-H(31B) | 109.5 |
| C(28)-C(31)-H(31C)  | 109.5 |
| H(31A)-C(31)-H(31C) | 109.5 |
| H(31B)-C(31)-H(31C) | 109.5 |

---

Symmetry transformations used to generate equivalent atoms:

**Table S16.** Anisotropic displacement parameters (  $\text{\AA}^2 \times 10^3$  ) for **28**. The anisotropic displacement factor exponent takes the form:  $-2\pi^2 [ h^2 a^{*2} U^{11} + \dots + 2 h k a^* b^* U^{12} ]$ 

|        | U <sup>11</sup> | U <sup>22</sup> | U <sup>33</sup> | U <sup>23</sup> | U <sup>13</sup> | U <sup>12</sup> |
|--------|-----------------|-----------------|-----------------|-----------------|-----------------|-----------------|
| O(1)   | 54(4)           | 50(4)           | 35(4)           | 2(3)            | -3(4)           | -14(3)          |
| O(2)   | 89(7)           | 77(6)           | 73(5)           | 4(6)            | -14(6)          | -45(5)          |
| C(3)   | 61(7)           | 51(6)           | 51(6)           | 4(5)            | 9(5)            | -16(5)          |
| C(4)   | 52(6)           | 48(6)           | 53(6)           | 10(5)           | 9(5)            | -8(5)           |
| I(5)   | 102(1)          | 66(1)           | 70(1)           | 10(1)           | 28(1)           | -20(1)          |
| C(6)   | 33(5)           | 43(5)           | 37(5)           | 6(4)            | -2(4)           | 3(4)            |
| C(7)   | 45(6)           | 62(6)           | 36(6)           | 2(5)            | -15(5)          | -5(5)           |
| C(8)   | 44(6)           | 57(6)           | 50(6)           | -6(5)           | -5(5)           | -8(5)           |
| C(9)   | 33(6)           | 38(5)           | 68(6)           | 0(5)            | 2(5)            | -3(4)           |
| C(10)  | 29(5)           | 39(5)           | 47(6)           | 6(4)            | 3(5)            | 0(4)            |
| C(11)  | 31(5)           | 45(5)           | 40(5)           | 8(4)            | -11(4)          | -4(4)           |
| O(12)  | 51(5)           | 33(4)           | 71(5)           | 0(4)            | 13(4)           | 6(3)            |
| Si(13) | 46(2)           | 39(2)           | 65(2)           | 4(2)            | -2(2)           | 2(2)            |
| C(14)  | 77(9)           | 58(8)           | 82(9)           | 4(8)            | 5(8)            | 0(7)            |
| C(15)  | 77(9)           | 67(9)           | 116(12)         | 11(9)           | -24(9)          | -16(7)          |
| C(16)  | 76(8)           | 54(7)           | 84(9)           | 6(7)            | 6(7)            | 14(6)           |
| C(17)  | 125(14)         | 60(9)           | 147(18)         | 25(10)          | 8(13)           | 20(9)           |
| C(18)  | 61(9)           | 117(13)         | 145(16)         | 14(11)          | -9(10)          | 15(8)           |
| C(19)  | 141(15)         | 76(10)          | 96(10)          | 1(9)            | 28(10)          | 42(10)          |
| C(20)  | 35(5)           | 43(5)           | 52(6)           | 3(5)            | 10(4)           | 2(4)            |
| C(21)  | 49(7)           | 62(7)           | 85(8)           | 13(6)           | -9(7)           | 14(6)           |
| C(22)  | 119(12)         | 65(9)           | 123(11)         | 15(8)           | 43(9)           | 19(8)           |
| C(23)  | 65(8)           | 58(6)           | 81(8)           | -17(6)          | 23(7)           | 0(6)            |
| N(24)  | 48(5)           | 43(4)           | 38(5)           | -2(4)           | 3(4)            | 3(4)            |
| C(25)  | 36(6)           | 53(5)           | 51(6)           | 5(5)            | 1(5)            | 1(4)            |
| O(26)  | 57(5)           | 47(4)           | 74(6)           | -2(4)           | 15(4)           | -7(4)           |
| O(27)  | 38(4)           | 76(5)           | 56(5)           | 6(4)            | 10(4)           | -10(4)          |
| C(28)  | 26(5)           | 78(7)           | 53(6)           | 2(6)            | 9(4)            | -14(5)          |
| C(29)  | 40(6)           | 108(11)         | 70(8)           | 15(8)           | -5(6)           | -9(7)           |
| C(30)  | 65(9)           | 82(8)           | 94(12)          | 29(8)           | 24(8)           | 3(7)            |
| C(31)  | 51(8)           | 123(12)         | 62(8)           | 1(8)            | 16(6)           | -25(8)          |

**Table S17.** Hydrogen coordinates (  $\times 10^4$  ) and isotropic displacement parameters (  $\text{\AA}^2 \times 10^3$  ) for **28**.

|        | x     | y    | z     | U(eq) |
|--------|-------|------|-------|-------|
| H(7)   | 5376  | 5854 | 11738 | 57    |
| H(8)   | 5919  | 6327 | 11158 | 60    |
| H(9)   | 6904  | 6382 | 7753  | 56    |
| H(10A) | 4017  | 6145 | 6463  | 46    |
| H(10B) | 5558  | 6196 | 5204  | 46    |
| H(14A) | 6017  | 7033 | 3734  | 108   |
| H(14B) | 4764  | 6779 | 3754  | 108   |
| H(14C) | 6564  | 6710 | 4134  | 108   |
| H(15A) | 7556  | 7224 | 7550  | 130   |
| H(15B) | 8125  | 6899 | 7824  | 130   |
| H(15C) | 7162  | 7055 | 9513  | 130   |
| H(17A) | 3226  | 7589 | 6889  | 166   |
| H(17B) | 4229  | 7441 | 5207  | 166   |
| H(17C) | 5054  | 7539 | 7182  | 166   |
| H(18A) | 1380  | 7168 | 6841  | 161   |
| H(18B) | 2025  | 6846 | 7039  | 161   |
| H(18C) | 2405  | 7031 | 5135  | 161   |
| H(19A) | 2644  | 7322 | 9932  | 157   |
| H(19B) | 4451  | 7260 | 10313 | 157   |
| H(19C) | 3237  | 6999 | 10254 | 157   |
| H(20)  | 8040  | 5900 | 7443  | 52    |
| H(21A) | 8624  | 5441 | 8125  | 78    |
| H(21B) | 7014  | 5330 | 7189  | 78    |
| H(22A) | 8530  | 5155 | 4886  | 123   |
| H(22B) | 9931  | 5370 | 5412  | 123   |
| H(23A) | 9175  | 5575 | 2620  | 82    |
| H(23B) | 7393  | 5473 | 2883  | 82    |
| H(29A) | 11903 | 6141 | 4179  | 87    |
| H(29B) | 12766 | 6404 | 3000  | 87    |
| H(30A) | 10436 | 6720 | 913   | 120   |
| H(30B) | 9662  | 6664 | 2995  | 120   |
| H(30C) | 8758  | 6572 | 1061  | 120   |
| H(31A) | 11849 | 6312 | -789  | 118   |
| H(31B) | 10113 | 6199 | -1144 | 118   |

|        |       |      |      |     |
|--------|-------|------|------|-----|
| H(31C) | 11388 | 5990 | -209 | 118 |
|--------|-------|------|------|-----|

---

#### 4.4 X-ray Crystal Structure of Compound 32

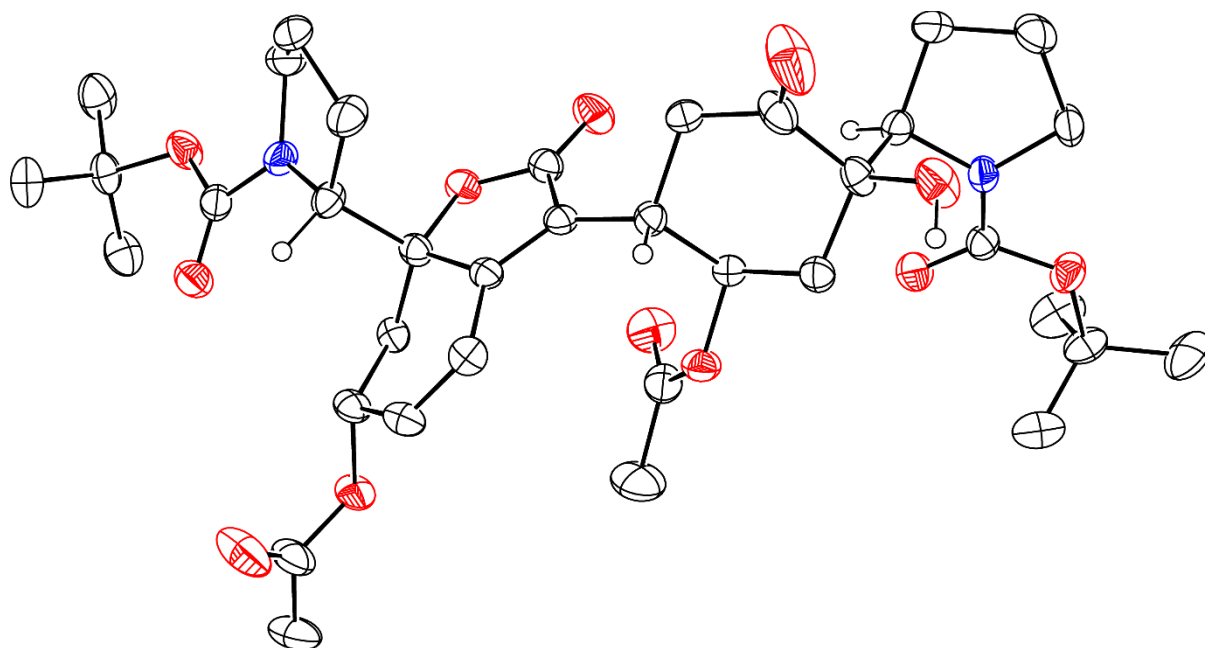

**Figure S4.** Thermal ellipsoid representation of **32**

**Table S18.** Crystal data and structure refinement for **32**.

|                                   |                                                      |         |
|-----------------------------------|------------------------------------------------------|---------|
| Empirical formula                 | C <sub>23</sub> H <sub>35</sub> IN O <sub>5</sub> Si |         |
| Formula weight                    | 560.51                                               |         |
| Temperature                       | 253(2) K                                             |         |
| Wavelength                        | 0.71073 Å                                            |         |
| Crystal system                    | Orthorhombic                                         |         |
| Space group                       | P2 <sub>1</sub> 2 <sub>1</sub> 2                     |         |
| Unit cell dimensions              | a = 8.5047(19) Å                                     | α = 90° |
|                                   | b = 46.069(10) Å                                     | β = 90° |
|                                   | c = 6.8117(16) Å                                     | γ = 90° |
| Volume                            | 2668.9(10) Å <sup>3</sup>                            |         |
| Z                                 | 4                                                    |         |
| Density (calculated)              | 1.395 Mg/m <sup>3</sup>                              |         |
| Absorption coefficient            | 1.275 mm <sup>-1</sup>                               |         |
| F(000)                            | 1148                                                 |         |
| Crystal size                      | 0.221 x 0.041 x 0.038 mm <sup>3</sup>                |         |
| Theta range for data collection   | 2.435 to 26.070°.                                    |         |
| Index ranges                      | -10 ≤ h ≤ 9, -53 ≤ k ≤ 56, -8 ≤ l ≤ 8                |         |
| Reflections collected             | 33699                                                |         |
| Independent reflections           | 5114 [R(int) = 0.1109]                               |         |
| Completeness to theta = 25.242°   | 99.4 %                                               |         |
| Absorption correction             | Semi-empirical from equivalents                      |         |
| Max. and min. transmission        | 0.7453 and 0.5410                                    |         |
| Refinement method                 | Full-matrix least-squares on F <sup>2</sup>          |         |
| Data / restraints / parameters    | 5114 / 437 / 288                                     |         |
| Goodness-of-fit on F <sup>2</sup> | 1.198                                                |         |
| Final R indices [I > 2σ(I)]       | R1 = 0.0849, wR2 = 0.1419                            |         |
| R indices (all data)              | R1 = 0.1205, wR2 = 0.1550                            |         |
| Absolute structure parameter      | 0.24(6)                                              |         |
| Largest diff. peak and hole       | 0.974 and -0.710 e·Å <sup>-3</sup>                   |         |

**Table S19.** Atomic coordinates (  $\times 10^4$  ) and equivalent isotropic displacement parameters (  $\text{\AA}^2 \times 10^3$  ) for **32**. U(eq) is defined as one third of the trace of the orthogonalized  $U^{ij}$  tensor.

|        | x         | y       | z         | U(eq)  |
|--------|-----------|---------|-----------|--------|
| O(1)   | 4832(9)   | 5624(2) | 5498(11)  | 46(2)  |
| O(2)   | 3184(12)  | 5246(2) | 5823(16)  | 80(3)  |
| C(3)   | 3946(15)  | 5429(3) | 6569(19)  | 54(3)  |
| C(4)   | 4149(14)  | 5504(3) | 8653(18)  | 51(3)  |
| I(5)   | 2944(1)   | 5289(1) | 10836(2)  | 79(1)  |
| C(6)   | 5062(12)  | 5735(2) | 8797(16)  | 38(2)  |
| C(7)   | 5393(13)  | 5925(3) | 10444(17) | 48(3)  |
| C(8)   | 5722(14)  | 6205(3) | 10082(19) | 50(3)  |
| C(9)   | 5796(13)  | 6334(2) | 8061(19)  | 46(3)  |
| C(10)  | 5167(12)  | 6132(2) | 6487(16)  | 38(2)  |
| C(11)  | 5644(12)  | 5818(2) | 6814(16)  | 38(2)  |
| O(12)  | 4892(9)   | 6598(2) | 8068(13)  | 52(2)  |
| Si(13) | 5429(4)   | 6905(1) | 7004(6)   | 50(1)  |
| C(14)  | 5729(18)  | 6850(3) | 4340(30)  | 72(4)  |
| C(15)  | 7290(18)  | 7037(3) | 8100(30)  | 87(5)  |
| C(16)  | 3763(18)  | 7156(3) | 7530(20)  | 71(4)  |
| C(17)  | 4100(20)  | 7460(4) | 6620(30)  | 111(7) |
| C(18)  | 2253(19)  | 7039(4) | 6540(30)  | 108(6) |
| C(19)  | 3500(20)  | 7187(4) | 9700(30)  | 104(6) |
| C(20)  | 7460(12)  | 5769(2) | 6546(17)  | 43(3)  |
| C(21)  | 7943(17)  | 5452(3) | 6970(20)  | 65(3)  |
| C(22)  | 8790(20)  | 5357(4) | 5200(30)  | 102(6) |
| C(23)  | 8317(17)  | 5550(3) | 3570(20)  | 68(4)  |
| N(24)  | 7955(11)  | 5823(2) | 4547(12)  | 43(2)  |
| C(25)  | 8729(12)  | 6081(3) | 4140(20)  | 46(2)  |
| O(26)  | 8749(10)  | 6285(2) | 5234(14)  | 59(2)  |
| O(27)  | 9370(9)   | 6068(2) | 2342(13)  | 57(2)  |
| C(28)  | 10554(13) | 6292(3) | 1760(19)  | 52(3)  |
| C(29)  | 11909(16) | 6277(3) | 3150(20)  | 73(4)  |
| C(30)  | 9783(18)  | 6589(3) | 1670(30)  | 80(5)  |
| C(31)  | 11018(17) | 6189(4) | -280(20)  | 79(4)  |



**Table S20.** Bond lengths [ $\text{\AA}$ ] and angles [ $^\circ$ ] for **32**.

---

|              |           |
|--------------|-----------|
| O(1)-C(3)    | 1.382(14) |
| O(1)-C(11)   | 1.443(13) |
| O(2)-C(3)    | 1.177(14) |
| C(3)-C(4)    | 1.472(18) |
| C(4)-C(6)    | 1.319(16) |
| C(4)-I(5)    | 2.061(11) |
| C(6)-C(7)    | 1.453(16) |
| C(6)-C(11)   | 1.489(16) |
| C(7)-C(8)    | 1.340(17) |
| C(7)-H(7)    | 0.9400    |
| C(8)-C(9)    | 1.502(17) |
| C(8)-H(8)    | 0.9400    |
| C(9)-O(12)   | 1.440(13) |
| C(9)-C(10)   | 1.518(16) |
| C(9)-H(9)    | 0.9900    |
| C(10)-C(11)  | 1.518(15) |
| C(10)-H(10A) | 0.9800    |
| C(10)-H(10B) | 0.9800    |
| C(11)-C(20)  | 1.572(15) |
| O(12)-Si(13) | 1.652(8)  |
| Si(13)-C(14) | 1.850(17) |
| Si(13)-C(15) | 1.853(15) |
| Si(13)-C(16) | 1.864(15) |
| C(14)-H(14A) | 0.9700    |
| C(14)-H(14B) | 0.9700    |
| C(14)-H(14C) | 0.9700    |
| C(15)-H(15A) | 0.9700    |
| C(15)-H(15B) | 0.9700    |
| C(15)-H(15C) | 0.9700    |
| C(16)-C(19)  | 1.50(2)   |
| C(16)-C(18)  | 1.55(2)   |
| C(16)-C(17)  | 1.56(2)   |
| C(17)-H(17A) | 0.9700    |
| C(17)-H(17B) | 0.9700    |
| C(17)-H(17C) | 0.9700    |

|                 |           |
|-----------------|-----------|
| C(18)-H(18A)    | 0.9700    |
| C(18)-H(18B)    | 0.9700    |
| C(18)-H(18C)    | 0.9700    |
| C(19)-H(19A)    | 0.9700    |
| C(19)-H(19B)    | 0.9700    |
| C(19)-H(19C)    | 0.9700    |
| C(20)-N(24)     | 1.447(14) |
| C(20)-C(21)     | 1.544(16) |
| C(20)-H(20)     | 0.9900    |
| C(21)-C(22)     | 1.47(2)   |
| C(21)-H(21A)    | 0.9800    |
| C(21)-H(21B)    | 0.9800    |
| C(22)-C(23)     | 1.48(2)   |
| C(22)-H(22A)    | 0.9800    |
| C(22)-H(22B)    | 0.9800    |
| C(23)-N(24)     | 1.457(15) |
| C(23)-H(23A)    | 0.9800    |
| C(23)-H(23B)    | 0.9800    |
| N(24)-C(25)     | 1.387(14) |
| C(25)-O(26)     | 1.202(14) |
| C(25)-O(27)     | 1.340(16) |
| O(27)-C(28)     | 1.497(14) |
| C(28)-C(29)     | 1.493(18) |
| C(28)-C(30)     | 1.52(2)   |
| C(28)-C(31)     | 1.520(19) |
| C(29)-H(29A)    | 0.9400    |
| C(29)-H(29B)    | 0.9400    |
| C(30)-H(30A)    | 0.9700    |
| C(30)-H(30B)    | 0.9700    |
| C(30)-H(30C)    | 0.9700    |
| C(31)-H(31A)    | 0.9700    |
| C(31)-H(31B)    | 0.9700    |
| C(31)-H(31C)    | 0.9700    |
| C(3)-O(1)-C(11) | 109.7(8)  |
| O(2)-C(3)-O(1)  | 122.5(12) |
| O(2)-C(3)-C(4)  | 130.5(12) |
| O(1)-C(3)-C(4)  | 107.0(10) |

|                     |           |
|---------------------|-----------|
| C(6)-C(4)-C(3)      | 109.3(10) |
| C(6)-C(4)-I(5)      | 128.8(9)  |
| C(3)-C(4)-I(5)      | 121.6(8)  |
| C(4)-C(6)-C(7)      | 131.2(11) |
| C(4)-C(6)-C(11)     | 109.7(10) |
| C(7)-C(6)-C(11)     | 118.7(9)  |
| C(8)-C(7)-C(6)      | 118.7(11) |
| C(8)-C(7)-H(7)      | 120.7     |
| C(6)-C(7)-H(7)      | 120.7     |
| C(7)-C(8)-C(9)      | 124.0(11) |
| C(7)-C(8)-H(8)      | 118.0     |
| C(9)-C(8)-H(8)      | 118.0     |
| O(12)-C(9)-C(8)     | 108.1(10) |
| O(12)-C(9)-C(10)    | 109.5(9)  |
| C(8)-C(9)-C(10)     | 112.9(9)  |
| O(12)-C(9)-H(9)     | 108.8     |
| C(8)-C(9)-H(9)      | 108.8     |
| C(10)-C(9)-H(9)     | 108.8     |
| C(11)-C(10)-C(9)    | 112.8(9)  |
| C(11)-C(10)-H(10A)  | 109.0     |
| C(9)-C(10)-H(10A)   | 109.0     |
| C(11)-C(10)-H(10B)  | 109.0     |
| C(9)-C(10)-H(10B)   | 109.0     |
| H(10A)-C(10)-H(10B) | 107.8     |
| O(1)-C(11)-C(6)     | 104.1(8)  |
| O(1)-C(11)-C(10)    | 111.8(8)  |
| C(6)-C(11)-C(10)    | 106.9(9)  |
| O(1)-C(11)-C(20)    | 107.9(9)  |
| C(6)-C(11)-C(20)    | 113.2(9)  |
| C(10)-C(11)-C(20)   | 112.6(9)  |
| C(9)-O(12)-Si(13)   | 125.0(7)  |
| O(12)-Si(13)-C(14)  | 110.6(6)  |
| O(12)-Si(13)-C(15)  | 109.8(6)  |
| C(14)-Si(13)-C(15)  | 108.9(8)  |
| O(12)-Si(13)-C(16)  | 103.6(6)  |
| C(14)-Si(13)-C(16)  | 112.2(7)  |
| C(15)-Si(13)-C(16)  | 111.6(7)  |
| Si(13)-C(14)-H(14A) | 109.5     |

|                     |           |
|---------------------|-----------|
| Si(13)-C(14)-H(14B) | 109.5     |
| H(14A)-C(14)-H(14B) | 109.5     |
| Si(13)-C(14)-H(14C) | 109.5     |
| H(14A)-C(14)-H(14C) | 109.5     |
| H(14B)-C(14)-H(14C) | 109.5     |
| Si(13)-C(15)-H(15A) | 109.5     |
| Si(13)-C(15)-H(15B) | 109.5     |
| H(15A)-C(15)-H(15B) | 109.5     |
| Si(13)-C(15)-H(15C) | 109.5     |
| H(15A)-C(15)-H(15C) | 109.5     |
| H(15B)-C(15)-H(15C) | 109.5     |
| C(19)-C(16)-C(18)   | 109.7(15) |
| C(19)-C(16)-C(17)   | 109.6(15) |
| C(18)-C(16)-C(17)   | 106.9(14) |
| C(19)-C(16)-Si(13)  | 111.2(11) |
| C(18)-C(16)-Si(13)  | 109.4(11) |
| C(17)-C(16)-Si(13)  | 109.9(12) |
| C(16)-C(17)-H(17A)  | 109.5     |
| C(16)-C(17)-H(17B)  | 109.5     |
| H(17A)-C(17)-H(17B) | 109.5     |
| C(16)-C(17)-H(17C)  | 109.5     |
| H(17A)-C(17)-H(17C) | 109.5     |
| H(17B)-C(17)-H(17C) | 109.5     |
| C(16)-C(18)-H(18A)  | 109.5     |
| C(16)-C(18)-H(18B)  | 109.5     |
| H(18A)-C(18)-H(18B) | 109.5     |
| C(16)-C(18)-H(18C)  | 109.5     |
| H(18A)-C(18)-H(18C) | 109.5     |
| H(18B)-C(18)-H(18C) | 109.5     |
| C(16)-C(19)-H(19A)  | 109.5     |
| C(16)-C(19)-H(19B)  | 109.5     |
| H(19A)-C(19)-H(19B) | 109.5     |
| C(16)-C(19)-H(19C)  | 109.5     |
| H(19A)-C(19)-H(19C) | 109.5     |
| H(19B)-C(19)-H(19C) | 109.5     |
| N(24)-C(20)-C(21)   | 105.1(9)  |
| N(24)-C(20)-C(11)   | 111.7(9)  |
| C(21)-C(20)-C(11)   | 112.2(9)  |

|                     |           |
|---------------------|-----------|
| N(24)-C(20)-H(20)   | 109.2     |
| C(21)-C(20)-H(20)   | 109.2     |
| C(11)-C(20)-H(20)   | 109.2     |
| C(22)-C(21)-C(20)   | 105.0(11) |
| C(22)-C(21)-H(21A)  | 110.7     |
| C(20)-C(21)-H(21A)  | 110.7     |
| C(22)-C(21)-H(21B)  | 110.7     |
| C(20)-C(21)-H(21B)  | 110.7     |
| H(21A)-C(21)-H(21B) | 108.8     |
| C(21)-C(22)-C(23)   | 107.6(12) |
| C(21)-C(22)-H(22A)  | 110.2     |
| C(23)-C(22)-H(22A)  | 110.2     |
| C(21)-C(22)-H(22B)  | 110.2     |
| C(23)-C(22)-H(22B)  | 110.2     |
| H(22A)-C(22)-H(22B) | 108.5     |
| N(24)-C(23)-C(22)   | 103.4(12) |
| N(24)-C(23)-H(23A)  | 111.1     |
| C(22)-C(23)-H(23A)  | 111.1     |
| N(24)-C(23)-H(23B)  | 111.1     |
| C(22)-C(23)-H(23B)  | 111.1     |
| H(23A)-C(23)-H(23B) | 109.0     |
| C(25)-N(24)-C(20)   | 118.5(10) |
| C(25)-N(24)-C(23)   | 123.1(10) |
| C(20)-N(24)-C(23)   | 110.0(9)  |
| O(26)-C(25)-O(27)   | 126.7(11) |
| O(26)-C(25)-N(24)   | 123.5(12) |
| O(27)-C(25)-N(24)   | 109.7(11) |
| C(25)-O(27)-C(28)   | 118.9(10) |
| C(29)-C(28)-O(27)   | 108.6(10) |
| C(29)-C(28)-C(30)   | 113.5(13) |
| O(27)-C(28)-C(30)   | 110.0(9)  |
| C(29)-C(28)-C(31)   | 111.5(11) |
| O(27)-C(28)-C(31)   | 101.6(11) |
| C(30)-C(28)-C(31)   | 111.0(13) |
| C(28)-C(29)-H(29A)  | 120.0     |
| C(28)-C(29)-H(29B)  | 120.0     |
| H(29A)-C(29)-H(29B) | 120.0     |
| C(28)-C(30)-H(30A)  | 109.5     |

|                     |       |
|---------------------|-------|
| C(28)-C(30)-H(30B)  | 109.5 |
| H(30A)-C(30)-H(30B) | 109.5 |
| C(28)-C(30)-H(30C)  | 109.5 |
| H(30A)-C(30)-H(30C) | 109.5 |
| H(30B)-C(30)-H(30C) | 109.5 |
| C(28)-C(31)-H(31A)  | 109.5 |
| C(28)-C(31)-H(31B)  | 109.5 |
| H(31A)-C(31)-H(31B) | 109.5 |
| C(28)-C(31)-H(31C)  | 109.5 |
| H(31A)-C(31)-H(31C) | 109.5 |
| H(31B)-C(31)-H(31C) | 109.5 |

---

Symmetry transformations used to generate equivalent atoms:

**Table S21.** Anisotropic displacement parameters ( $\text{\AA}^2 \times 10^3$ ) for **32**. The anisotropic displacement factor exponent takes the form:  $-2\pi^2 [ h^2 a^{*2} U^{11} + \dots + 2 h k a^* b^* U^{12} ]$ 

|        | U <sup>11</sup> | U <sup>22</sup> | U <sup>33</sup> | U <sup>23</sup> | U <sup>13</sup> | U <sup>12</sup> |
|--------|-----------------|-----------------|-----------------|-----------------|-----------------|-----------------|
| O(1)   | 54(4)           | 50(4)           | 35(4)           | 2(3)            | -3(4)           | -14(3)          |
| O(2)   | 89(7)           | 77(6)           | 73(5)           | 4(6)            | -14(6)          | -45(5)          |
| C(3)   | 61(7)           | 51(6)           | 51(6)           | 4(5)            | 9(5)            | -16(5)          |
| C(4)   | 52(6)           | 48(6)           | 53(6)           | 10(5)           | 9(5)            | -8(5)           |
| I(5)   | 102(1)          | 66(1)           | 70(1)           | 10(1)           | 28(1)           | -20(1)          |
| C(6)   | 33(5)           | 43(5)           | 37(5)           | 6(4)            | -2(4)           | 3(4)            |
| C(7)   | 45(6)           | 62(6)           | 36(6)           | 2(5)            | -15(5)          | -5(5)           |
| C(8)   | 44(6)           | 57(6)           | 50(6)           | -6(5)           | -5(5)           | -8(5)           |
| C(9)   | 33(6)           | 38(5)           | 68(6)           | 0(5)            | 2(5)            | -3(4)           |
| C(10)  | 29(5)           | 39(5)           | 47(6)           | 6(4)            | 3(5)            | 0(4)            |
| C(11)  | 31(5)           | 45(5)           | 40(5)           | 8(4)            | -11(4)          | -4(4)           |
| O(12)  | 51(5)           | 33(4)           | 71(5)           | 0(4)            | 13(4)           | 6(3)            |
| Si(13) | 46(2)           | 39(2)           | 65(2)           | 4(2)            | -2(2)           | 2(2)            |
| C(14)  | 77(9)           | 58(8)           | 82(9)           | 4(8)            | 5(8)            | 0(7)            |
| C(15)  | 77(9)           | 67(9)           | 116(12)         | 11(9)           | -24(9)          | -16(7)          |
| C(16)  | 76(8)           | 54(7)           | 84(9)           | 6(7)            | 6(7)            | 14(6)           |
| C(17)  | 125(14)         | 60(9)           | 147(18)         | 25(10)          | 8(13)           | 20(9)           |
| C(18)  | 61(9)           | 117(13)         | 145(16)         | 14(11)          | -9(10)          | 15(8)           |
| C(19)  | 141(15)         | 76(10)          | 96(10)          | 1(9)            | 28(10)          | 42(10)          |
| C(20)  | 35(5)           | 43(5)           | 52(6)           | 3(5)            | 10(4)           | 2(4)            |
| C(21)  | 49(7)           | 62(7)           | 85(8)           | 13(6)           | -9(7)           | 14(6)           |
| C(22)  | 119(12)         | 65(9)           | 123(11)         | 15(8)           | 43(9)           | 19(8)           |
| C(23)  | 65(8)           | 58(6)           | 81(8)           | -17(6)          | 23(7)           | 0(6)            |
| N(24)  | 48(5)           | 43(4)           | 38(5)           | -2(4)           | 3(4)            | 3(4)            |
| C(25)  | 36(6)           | 53(5)           | 51(6)           | 5(5)            | 1(5)            | 1(4)            |
| O(26)  | 57(5)           | 47(4)           | 74(6)           | -2(4)           | 15(4)           | -7(4)           |
| O(27)  | 38(4)           | 76(5)           | 56(5)           | 6(4)            | 10(4)           | -10(4)          |
| C(28)  | 26(5)           | 78(7)           | 53(6)           | 2(6)            | 9(4)            | -14(5)          |
| C(29)  | 40(6)           | 108(11)         | 70(8)           | 15(8)           | -5(6)           | -9(7)           |
| C(30)  | 65(9)           | 82(8)           | 94(12)          | 29(8)           | 24(8)           | 3(7)            |
| C(31)  | 51(8)           | 123(12)         | 62(8)           | 1(8)            | 16(6)           | -25(8)          |

**Table S22.** Hydrogen coordinates (  $\times 10^4$  ) and isotropic displacement parameters (  $\text{\AA}^2 \times 10^3$  ) for **32**.

|        | x     | y    | z     | U(eq) |
|--------|-------|------|-------|-------|
| H(7)   | 5376  | 5854 | 11738 | 57    |
| H(8)   | 5919  | 6327 | 11158 | 60    |
| H(9)   | 6904  | 6382 | 7753  | 56    |
| H(10A) | 4017  | 6145 | 6463  | 46    |
| H(10B) | 5558  | 6196 | 5204  | 46    |
| H(14A) | 6017  | 7033 | 3734  | 108   |
| H(14B) | 4764  | 6779 | 3754  | 108   |
| H(14C) | 6564  | 6710 | 4134  | 108   |
| H(15A) | 7556  | 7224 | 7550  | 130   |
| H(15B) | 8125  | 6899 | 7824  | 130   |
| H(15C) | 7162  | 7055 | 9513  | 130   |
| H(17A) | 3226  | 7589 | 6889  | 166   |
| H(17B) | 4229  | 7441 | 5207  | 166   |
| H(17C) | 5054  | 7539 | 7182  | 166   |
| H(18A) | 1380  | 7168 | 6841  | 161   |
| H(18B) | 2025  | 6846 | 7039  | 161   |
| H(18C) | 2405  | 7031 | 5135  | 161   |
| H(19A) | 2644  | 7322 | 9932  | 157   |
| H(19B) | 4451  | 7260 | 10313 | 157   |
| H(19C) | 3237  | 6999 | 10254 | 157   |
| H(20)  | 8040  | 5900 | 7443  | 52    |
| H(21A) | 8624  | 5441 | 8125  | 78    |
| H(21B) | 7014  | 5330 | 7189  | 78    |
| H(22A) | 8530  | 5155 | 4886  | 123   |
| H(22B) | 9931  | 5370 | 5412  | 123   |
| H(23A) | 9175  | 5575 | 2620  | 82    |
| H(23B) | 7393  | 5473 | 2883  | 82    |
| H(29A) | 11903 | 6141 | 4179  | 87    |
| H(29B) | 12766 | 6404 | 3000  | 87    |
| H(30A) | 10436 | 6720 | 913   | 120   |
| H(30B) | 9662  | 6664 | 2995  | 120   |
| H(30C) | 8758  | 6572 | 1061  | 120   |
| H(31A) | 11849 | 6312 | -789  | 118   |
| H(31B) | 10113 | 6199 | -1144 | 118   |



|        |       |      |      |     |
|--------|-------|------|------|-----|
| H(31C) | 11388 | 5990 | -209 | 118 |
|--------|-------|------|------|-----|

---

#### 4.5 X-ray Crystal Structure of Compound 7

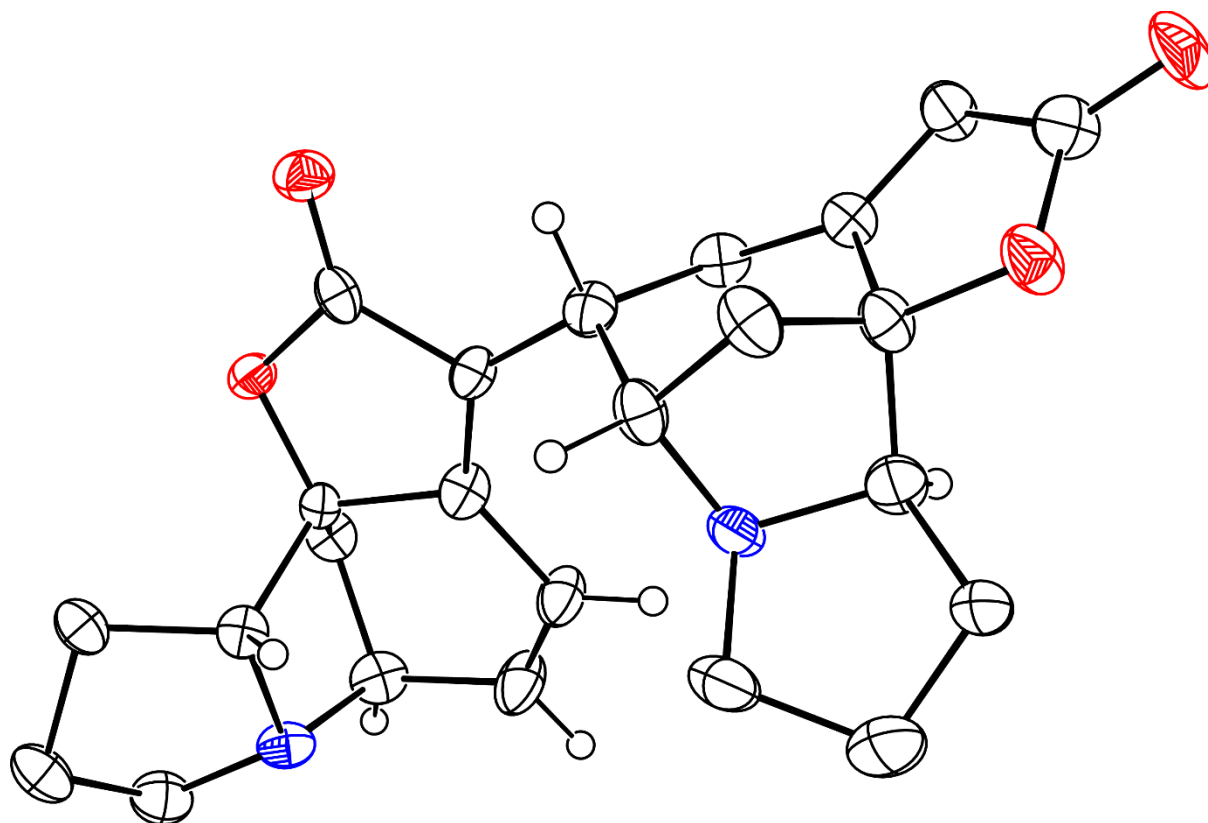

**Figure S5.** Thermal ellipsoid representation of 7

**Table S23.** Crystal data and structure refinement for **7**.

|                                   |                                                               |                 |
|-----------------------------------|---------------------------------------------------------------|-----------------|
| Empirical formula                 | C <sub>24</sub> H <sub>26</sub> N <sub>2</sub> O <sub>4</sub> |                 |
| Formula weight                    | 406.47                                                        |                 |
| Temperature                       | 203(2) K                                                      |                 |
| Wavelength                        | 0.71073 Å                                                     |                 |
| Crystal system                    | Monoclinic                                                    |                 |
| Space group                       | P2 <sub>1</sub>                                               |                 |
| Unit cell dimensions              | a = 11.950(2) Å                                               | α = 90°         |
|                                   | b = 6.4623(13) Å                                              | β = 103.465(5)° |
|                                   | c = 13.674(2) Å                                               | γ = 90°         |
| Volume                            | 1026.9(3) Å <sup>3</sup>                                      |                 |
| Z                                 | 2                                                             |                 |
| Density (calculated)              | 1.315 Mg/m <sup>3</sup>                                       |                 |
| Absorption coefficient            | 0.090 mm <sup>-1</sup>                                        |                 |
| F(000)                            | 432                                                           |                 |
| Crystal size                      | 0.072 x 0.043 x 0.017 mm <sup>3</sup>                         |                 |
| Theta range for data collection   | 2.582 to 27.195°.                                             |                 |
| Index ranges                      | -14 ≤ h ≤ 15, -8 ≤ k ≤ 8, -16 ≤ l ≤ 16                        |                 |
| Reflections collected             | 14906                                                         |                 |
| Independent reflections           | 4183 [R(int) = 0.1161]                                        |                 |
| Completeness to theta = 25.242°   | 99.6 %                                                        |                 |
| Absorption correction             | Semi-empirical from equivalents                               |                 |
| Max. and min. transmission        | 0.7455 and 0.6756                                             |                 |
| Refinement method                 | Full-matrix least-squares on F <sup>2</sup>                   |                 |
| Data / restraints / parameters    | 4183 / 106 / 299                                              |                 |
| Goodness-of-fit on F <sup>2</sup> | 1.130                                                         |                 |
| Final R indices [I > 2σ(I)]       | R1 = 0.0932, wR2 = 0.1118                                     |                 |
| R indices (all data)              | R1 = 0.1784, wR2 = 0.1343                                     |                 |
| Absolute structure parameter      | -0.4(10)                                                      |                 |
| Largest diff. peak and hole       | 0.232 and -0.286 e·Å <sup>-3</sup>                            |                 |

**Table S24.** Atomic coordinates (  $\times 10^4$  ) and equivalent isotropic displacement parameters (  $\text{\AA}^2 \times 10^3$  ) for **7**. U(eq) is defined as one third of the trace of the orthogonalized  $U^{ij}$  tensor.

|        | x         | y         | z        | U(eq)  |
|--------|-----------|-----------|----------|--------|
| O(1)   | 3006(4)   | 4831(8)   | 18(3)    | 45(1)  |
| O(2)   | 3848(5)   | 6819(9)   | -964(4)  | 57(2)  |
| C(3)   | 3662(6)   | 6525(12)  | -147(6)  | 39(2)  |
| C(4)   | 4010(6)   | 7692(12)  | 790(5)   | 36(2)  |
| C(5)   | 3596(6)   | 6736(11)  | 1500(5)  | 29(2)  |
| C(6)   | 2971(6)   | 4816(12)  | 1074(5)  | 34(2)  |
| C(7)   | 1747(6)   | 4744(12)  | 1245(5)  | 39(2)  |
| C(8)   | 848(10)   | 3287(19)  | 606(8)   | 48(3)  |
| C(9)   | 155(10)   | 2670(20)  | 1355(7)  | 63(4)  |
| C(10)  | 1100(30)  | 2300(70)  | 2303(15) | 53(4)  |
| C(8B)  | 1270(60)  | 2740(60)  | 670(40)  | 51(9)  |
| C(9B)  | 850(50)   | 1230(90)  | 1380(30) | 55(7)  |
| C(10B) | 1150(190) | 2300(400) | 2430(90) | 56(10) |
| N(11)  | 1940(5)   | 3988(9)   | 2305(4)  | 34(2)  |
| C(12)  | 3162(6)   | 3401(11)  | 2654(5)  | 34(2)  |
| C(13)  | 3554(7)   | 2973(11)  | 1666(5)  | 39(2)  |
| C(14)  | 3637(6)   | 7201(11)  | 2580(5)  | 33(2)  |
| C(15)  | 3865(5)   | 5186(12)  | 3215(4)  | 32(2)  |
| O(16)  | 4375(3)   | 5495(8)   | 6015(3)  | 29(1)  |
| O(17)  | 5732(4)   | 5293(8)   | 5123(3)  | 37(1)  |
| C(18)  | 4731(6)   | 5368(12)  | 5127(5)  | 31(2)  |
| C(19)  | 3713(5)   | 5454(12)  | 4272(4)  | 27(2)  |
| C(20)  | 2785(5)   | 5777(11)  | 4655(5)  | 31(2)  |
| C(21)  | 3129(5)   | 5608(12)  | 5791(4)  | 26(2)  |
| C(22)  | 2595(6)   | 3703(10)  | 6164(5)  | 28(2)  |
| C(23)  | 3224(6)   | 2859(12)  | 7197(5)  | 35(2)  |
| C(24)  | 2248(6)   | 2298(12)  | 7709(5)  | 39(2)  |
| C(25)  | 1417(6)   | 4111(12)  | 7365(5)  | 42(2)  |
| N(26)  | 1440(5)   | 4453(9)   | 6296(4)  | 30(2)  |
| C(27)  | 1383(6)   | 6692(12)  | 5994(5)  | 37(2)  |
| C(28)  | 2636(6)   | 7424(10)  | 6262(5)  | 31(2)  |
| C(29)  | 908(6)    | 6776(13)  | 4859(5)  | 45(2)  |
| C(30)  | 1580(6)   | 6293(11)  | 4234(5)  | 38(2)  |



**Table S25.** Bond lengths [Å] and angles [°] for **7**.

|               |           |
|---------------|-----------|
| O(1)-C(3)     | 1.395(8)  |
| O(1)-C(6)     | 1.454(8)  |
| O(2)-C(3)     | 1.203(8)  |
| C(3)-C(4)     | 1.461(9)  |
| C(4)-C(5)     | 1.339(9)  |
| C(4)-H(4)     | 0.9500    |
| C(5)-C(6)     | 1.494(9)  |
| C(5)-C(14)    | 1.498(9)  |
| C(6)-C(13)    | 1.516(10) |
| C(6)-C(7)     | 1.535(9)  |
| C(7)-N(11)    | 1.495(8)  |
| C(7)-C(8)     | 1.539(12) |
| C(7)-C(8B)    | 1.55(3)   |
| C(7)-H(7)     | 1.0000    |
| C(8)-C(9)     | 1.513(13) |
| C(8)-H(8A)    | 0.9900    |
| C(8)-H(8B)    | 0.9900    |
| C(9)-C(10)    | 1.53(3)   |
| C(9)-H(9A)    | 0.9900    |
| C(9)-H(9B)    | 0.9900    |
| C(10)-N(11)   | 1.48(4)   |
| C(10)-H(10A)  | 0.9900    |
| C(10)-H(10B)  | 0.9900    |
| C(8B)-C(9B)   | 1.55(3)   |
| C(8B)-H(8BA)  | 0.9900    |
| C(8B)-H(8BB)  | 0.9900    |
| C(9B)-C(10B)  | 1.54(3)   |
| C(9B)-H(9BA)  | 0.9900    |
| C(9B)-H(9BB)  | 0.9900    |
| C(10B)-N(11)  | 1.5(2)    |
| C(10B)-H(10C) | 0.9900    |
| C(10B)-H(10D) | 0.9900    |
| N(11)-C(12)   | 1.477(8)  |
| C(12)-C(15)   | 1.524(9)  |
| C(12)-C(13)   | 1.554(10) |
| C(12)-H(12)   | 1.0000    |

|              |           |
|--------------|-----------|
| C(13)-H(13A) | 0.9900    |
| C(13)-H(13B) | 0.9900    |
| C(14)-C(15)  | 1.553(10) |
| C(14)-H(14A) | 0.9900    |
| C(14)-H(14B) | 0.9900    |
| C(15)-C(19)  | 1.507(8)  |
| C(15)-H(15)  | 1.0000    |
| O(16)-C(18)  | 1.379(7)  |
| O(16)-C(21)  | 1.451(7)  |
| O(17)-C(18)  | 1.199(7)  |
| C(18)-C(19)  | 1.479(8)  |
| C(19)-C(20)  | 1.349(8)  |
| C(20)-C(30)  | 1.460(9)  |
| C(20)-C(21)  | 1.515(8)  |
| C(21)-C(28)  | 1.521(9)  |
| C(21)-C(22)  | 1.528(9)  |
| C(22)-N(26)  | 1.512(8)  |
| C(22)-C(23)  | 1.538(9)  |
| C(22)-H(22)  | 1.0000    |
| C(23)-C(24)  | 1.536(9)  |
| C(23)-H(23A) | 0.9900    |
| C(23)-H(23B) | 0.9900    |
| C(24)-C(25)  | 1.537(10) |
| C(24)-H(24A) | 0.9900    |
| C(24)-H(24B) | 0.9900    |
| C(25)-N(26)  | 1.485(9)  |
| C(25)-H(25A) | 0.9900    |
| C(25)-H(25B) | 0.9900    |
| N(26)-C(27)  | 1.502(9)  |
| C(27)-C(29)  | 1.524(9)  |
| C(27)-C(28)  | 1.532(9)  |
| C(27)-H(27)  | 1.0000    |
| C(28)-H(28A) | 0.9900    |
| C(28)-H(28B) | 0.9900    |
| C(29)-C(30)  | 1.339(9)  |
| C(29)-H(29)  | 0.9500    |
| C(30)-H(30)  | 0.9500    |

|                    |           |
|--------------------|-----------|
| C(3)-O(1)-C(6)     | 108.2(5)  |
| O(2)-C(3)-O(1)     | 120.4(7)  |
| O(2)-C(3)-C(4)     | 131.0(7)  |
| O(1)-C(3)-C(4)     | 108.6(6)  |
| C(5)-C(4)-C(3)     | 108.7(7)  |
| C(5)-C(4)-H(4)     | 125.7     |
| C(3)-C(4)-H(4)     | 125.7     |
| C(4)-C(5)-C(6)     | 109.6(6)  |
| C(4)-C(5)-C(14)    | 133.7(7)  |
| C(6)-C(5)-C(14)    | 116.7(6)  |
| O(1)-C(6)-C(5)     | 104.7(6)  |
| O(1)-C(6)-C(13)    | 114.8(6)  |
| C(5)-C(6)-C(13)    | 108.6(6)  |
| O(1)-C(6)-C(7)     | 113.6(5)  |
| C(5)-C(6)-C(7)     | 111.9(6)  |
| C(13)-C(6)-C(7)    | 103.3(6)  |
| N(11)-C(7)-C(6)    | 102.7(5)  |
| N(11)-C(7)-C(8)    | 106.3(6)  |
| C(6)-C(7)-C(8)     | 119.8(7)  |
| N(11)-C(7)-C(8B)   | 100.0(19) |
| C(6)-C(7)-C(8B)    | 102(2)    |
| N(11)-C(7)-H(7)    | 109.2     |
| C(6)-C(7)-H(7)     | 109.2     |
| C(8)-C(7)-H(7)     | 109.2     |
| C(9)-C(8)-C(7)     | 101.3(8)  |
| C(9)-C(8)-H(8A)    | 111.5     |
| C(7)-C(8)-H(8A)    | 111.5     |
| C(9)-C(8)-H(8B)    | 111.5     |
| C(7)-C(8)-H(8B)    | 111.5     |
| H(8A)-C(8)-H(8B)   | 109.3     |
| C(8)-C(9)-C(10)    | 101.6(16) |
| C(8)-C(9)-H(9A)    | 111.5     |
| C(10)-C(9)-H(9A)   | 111.5     |
| C(8)-C(9)-H(9B)    | 111.5     |
| C(10)-C(9)-H(9B)   | 111.5     |
| H(9A)-C(9)-H(9B)   | 109.3     |
| N(11)-C(10)-C(9)   | 105(3)    |
| N(11)-C(10)-H(10A) | 110.8     |



|                      |           |
|----------------------|-----------|
| C(9)-C(10)-H(10A)    | 110.8     |
| N(11)-C(10)-H(10B)   | 110.8     |
| C(9)-C(10)-H(10B)    | 110.8     |
| H(10A)-C(10)-H(10B)  | 108.9     |
| C(9B)-C(8B)-C(7)     | 110(3)    |
| C(9B)-C(8B)-H(8BA)   | 109.7     |
| C(7)-C(8B)-H(8BA)    | 109.7     |
| C(9B)-C(8B)-H(8BB)   | 109.7     |
| C(7)-C(8B)-H(8BB)    | 109.7     |
| H(8BA)-C(8B)-H(8BB)  | 108.2     |
| C(10B)-C(9B)-C(8B)   | 106(9)    |
| C(10B)-C(9B)-H(9BA)  | 110.6     |
| C(8B)-C(9B)-H(9BA)   | 110.6     |
| C(10B)-C(9B)-H(9BB)  | 110.6     |
| C(8B)-C(9B)-H(9BB)   | 110.6     |
| H(9BA)-C(9B)-H(9BB)  | 108.8     |
| N(11)-C(10B)-C(9B)   | 104(10)   |
| N(11)-C(10B)-H(10C)  | 111.0     |
| C(9B)-C(10B)-H(10C)  | 111.0     |
| N(11)-C(10B)-H(10D)  | 111.0     |
| C(9B)-C(10B)-H(10D)  | 111.0     |
| H(10C)-C(10B)-H(10D) | 109.0     |
| C(12)-N(11)-C(10)    | 115.5(19) |
| C(12)-N(11)-C(10B)   | 112(10)   |
| C(12)-N(11)-C(7)     | 108.4(5)  |
| C(10)-N(11)-C(7)     | 106.7(11) |
| C(10B)-N(11)-C(7)    | 113(5)    |
| N(11)-C(12)-C(15)    | 110.8(6)  |
| N(11)-C(12)-C(13)    | 103.9(6)  |
| C(15)-C(12)-C(13)    | 109.3(6)  |
| N(11)-C(12)-H(12)    | 110.9     |
| C(15)-C(12)-H(12)    | 110.9     |
| C(13)-C(12)-H(12)    | 110.9     |
| C(6)-C(13)-C(12)     | 97.5(5)   |
| C(6)-C(13)-H(13A)    | 112.3     |
| C(12)-C(13)-H(13A)   | 112.3     |
| C(6)-C(13)-H(13B)    | 112.3     |
| C(12)-C(13)-H(13B)   | 112.3     |

|                     |          |
|---------------------|----------|
| H(13A)-C(13)-H(13B) | 109.9    |
| C(5)-C(14)-C(15)    | 110.1(6) |
| C(5)-C(14)-H(14A)   | 109.6    |
| C(15)-C(14)-H(14A)  | 109.6    |
| C(5)-C(14)-H(14B)   | 109.6    |
| C(15)-C(14)-H(14B)  | 109.6    |
| H(14A)-C(14)-H(14B) | 108.1    |
| C(19)-C(15)-C(12)   | 113.2(6) |
| C(19)-C(15)-C(14)   | 113.2(6) |
| C(12)-C(15)-C(14)   | 110.4(5) |
| C(19)-C(15)-H(15)   | 106.5    |
| C(12)-C(15)-H(15)   | 106.5    |
| C(14)-C(15)-H(15)   | 106.5    |
| C(18)-O(16)-C(21)   | 109.2(5) |
| O(17)-C(18)-O(16)   | 121.2(6) |
| O(17)-C(18)-C(19)   | 129.5(6) |
| O(16)-C(18)-C(19)   | 109.2(5) |
| C(20)-C(19)-C(18)   | 107.3(5) |
| C(20)-C(19)-C(15)   | 133.2(6) |
| C(18)-C(19)-C(15)   | 119.5(5) |
| C(19)-C(20)-C(30)   | 134.9(6) |
| C(19)-C(20)-C(21)   | 109.7(5) |
| C(30)-C(20)-C(21)   | 115.4(5) |
| O(16)-C(21)-C(20)   | 103.9(5) |
| O(16)-C(21)-C(28)   | 115.4(6) |
| C(20)-C(21)-C(28)   | 109.8(6) |
| O(16)-C(21)-C(22)   | 112.2(6) |
| C(20)-C(21)-C(22)   | 111.4(6) |
| C(28)-C(21)-C(22)   | 104.3(5) |
| N(26)-C(22)-C(21)   | 104.2(5) |
| N(26)-C(22)-C(23)   | 105.6(5) |
| C(21)-C(22)-C(23)   | 116.1(6) |
| N(26)-C(22)-H(22)   | 110.2    |
| C(21)-C(22)-H(22)   | 110.2    |
| C(23)-C(22)-H(22)   | 110.2    |
| C(24)-C(23)-C(22)   | 104.0(6) |
| C(24)-C(23)-H(23A)  | 111.0    |
| C(22)-C(23)-H(23A)  | 111.0    |

|                     |          |
|---------------------|----------|
| C(24)-C(23)-H(23B)  | 111.0    |
| C(22)-C(23)-H(23B)  | 111.0    |
| H(23A)-C(23)-H(23B) | 109.0    |
| C(23)-C(24)-C(25)   | 100.8(6) |
| C(23)-C(24)-H(24A)  | 111.6    |
| C(25)-C(24)-H(24A)  | 111.6    |
| C(23)-C(24)-H(24B)  | 111.6    |
| C(25)-C(24)-H(24B)  | 111.6    |
| H(24A)-C(24)-H(24B) | 109.4    |
| N(26)-C(25)-C(24)   | 104.8(6) |
| N(26)-C(25)-H(25A)  | 110.8    |
| C(24)-C(25)-H(25A)  | 110.8    |
| N(26)-C(25)-H(25B)  | 110.8    |
| C(24)-C(25)-H(25B)  | 110.8    |
| H(25A)-C(25)-H(25B) | 108.9    |
| C(25)-N(26)-C(27)   | 113.8(6) |
| C(25)-N(26)-C(22)   | 107.3(5) |
| C(27)-N(26)-C(22)   | 105.1(6) |
| N(26)-C(27)-C(29)   | 107.3(6) |
| N(26)-C(27)-C(28)   | 104.6(6) |
| C(29)-C(27)-C(28)   | 110.1(6) |
| N(26)-C(27)-H(27)   | 111.5    |
| C(29)-C(27)-H(27)   | 111.5    |
| C(28)-C(27)-H(27)   | 111.5    |
| C(21)-C(28)-C(27)   | 96.6(5)  |
| C(21)-C(28)-H(28A)  | 112.4    |
| C(27)-C(28)-H(28A)  | 112.4    |
| C(21)-C(28)-H(28B)  | 112.4    |
| C(27)-C(28)-H(28B)  | 112.4    |
| H(28A)-C(28)-H(28B) | 110.0    |
| C(30)-C(29)-C(27)   | 120.4(6) |
| C(30)-C(29)-H(29)   | 119.8    |
| C(27)-C(29)-H(29)   | 119.8    |
| C(29)-C(30)-C(20)   | 119.0(6) |
| C(29)-C(30)-H(30)   | 120.5    |
| C(20)-C(30)-H(30)   | 120.5    |

---

Symmetry transformations used to generate equivalent atoms:

**Table S26.** Anisotropic displacement parameters ( $\text{\AA}^2 \times 10^3$ ) for **7**. The anisotropic displacement factor exponent takes the form:  $-2\pi^2 [ h^2 a^{*2} U^{11} + \dots + 2 h k a^* b^* U^{12} ]$ 

|        | $U^{11}$ | $U^{22}$ | $U^{33}$ | $U^{23}$ | $U^{13}$ | $U^{12}$ |
|--------|----------|----------|----------|----------|----------|----------|
| O(1)   | 63(3)    | 45(4)    | 28(3)    | -8(3)    | 14(3)    | -19(3)   |
| O(2)   | 82(4)    | 71(4)    | 24(3)    | -11(3)   | 26(3)    | -22(4)   |
| C(3)   | 46(5)    | 37(5)    | 37(5)    | -14(4)   | 14(4)    | -7(4)    |
| C(4)   | 46(5)    | 33(5)    | 30(4)    | -3(4)    | 10(4)    | -10(4)   |
| C(5)   | 34(4)    | 23(4)    | 30(4)    | -4(4)    | 11(3)    | 2(3)     |
| C(6)   | 47(4)    | 31(5)    | 25(4)    | -6(3)    | 12(3)    | -3(4)    |
| C(7)   | 44(5)    | 33(5)    | 39(5)    | -3(4)    | 7(4)     | -11(4)   |
| C(8)   | 42(7)    | 66(7)    | 36(6)    | 2(5)     | 7(5)     | -22(6)   |
| C(9)   | 53(7)    | 71(8)    | 61(6)    | -6(6)    | 8(5)     | -29(6)   |
| C(10)  | 52(7)    | 61(7)    | 48(8)    | 5(8)     | 20(7)    | -21(6)   |
| C(8B)  | 51(15)   | 63(15)   | 36(14)   | 0(13)    | 5(13)    | -24(14)  |
| C(9B)  | 54(12)   | 65(12)   | 49(12)   | 3(11)    | 15(11)   | -27(11)  |
| C(10B) | 53(15)   | 63(15)   | 53(15)   | 2(14)    | 12(14)   | -21(14)  |
| N(11)  | 38(4)    | 39(4)    | 29(4)    | -1(3)    | 13(3)    | -12(3)   |
| C(12)  | 48(5)    | 25(5)    | 30(4)    | 2(3)     | 10(4)    | 2(4)     |
| C(13)  | 54(5)    | 28(5)    | 40(5)    | 4(4)     | 19(4)    | 7(4)     |
| C(14)  | 34(4)    | 27(5)    | 39(5)    | -5(4)    | 10(4)    | -1(4)    |
| C(15)  | 29(4)    | 36(5)    | 31(4)    | -2(4)    | 8(3)     | 7(4)     |
| O(16)  | 23(2)    | 38(3)    | 26(2)    | -1(3)    | 4(2)     | -2(3)    |
| O(17)  | 29(3)    | 40(3)    | 43(3)    | 0(3)     | 13(2)    | 3(3)     |
| C(18)  | 42(4)    | 22(4)    | 29(4)    | 7(4)     | 10(4)    | 2(4)     |
| C(19)  | 26(3)    | 28(4)    | 27(4)    | -1(4)    | 2(3)     | 5(4)     |
| C(20)  | 33(4)    | 30(5)    | 28(4)    | -7(3)    | 5(3)     | 5(4)     |
| C(21)  | 24(4)    | 30(4)    | 24(4)    | 5(4)     | 4(3)     | 2(4)     |
| C(22)  | 31(4)    | 27(4)    | 28(4)    | -5(3)    | 10(3)    | 5(3)     |
| C(23)  | 44(5)    | 26(4)    | 37(5)    | 4(4)     | 13(4)    | -1(4)    |
| C(24)  | 56(5)    | 33(5)    | 36(4)    | -2(4)    | 24(4)    | -4(4)    |
| C(25)  | 41(5)    | 44(5)    | 43(5)    | -5(4)    | 18(4)    | -2(4)    |
| N(26)  | 27(3)    | 31(4)    | 36(4)    | -9(3)    | 14(3)    | 0(3)     |
| C(27)  | 36(4)    | 36(5)    | 39(5)    | -9(4)    | 12(4)    | 1(4)     |
| C(28)  | 38(5)    | 25(4)    | 32(4)    | -4(3)    | 11(4)    | 2(4)     |
| C(29)  | 32(4)    | 63(6)    | 38(5)    | 1(4)     | 2(4)     | 18(4)    |
| C(30)  | 31(4)    | 52(6)    | 30(4)    | 0(4)     | 3(3)     | 13(4)    |



**Table S27.** Hydrogen coordinates (  $\times 10^4$  ) and isotropic displacement parameters (  $\text{\AA}^2 \times 10^3$  ) for **7**.

|        | x    | y    | z    | U(eq) |
|--------|------|------|------|-------|
| H(4)   | 4456 | 8925 | 880  | 43    |
| H(7)   | 1427 | 6180 | 1204 | 47    |
| H(8A)  | 366  | 4015 | 20   | 58    |
| H(8B)  | 1215 | 2071 | 370  | 58    |
| H(9A)  | -297 | 1399 | 1142 | 75    |
| H(9B)  | -371 | 3796 | 1455 | 75    |
| H(10A) | 788  | 2373 | 2912 | 63    |
| H(10B) | 1466 | 935  | 2279 | 63    |
| H(8BA) | 620  | 3093 | 97   | 61    |
| H(8BB) | 1876 | 2071 | 398  | 61    |
| H(9BA) | 6    | 1007 | 1163 | 66    |
| H(9BB) | 1238 | -128 | 1402 | 66    |
| H(10C) | 456  | 2795 | 2616 | 68    |
| H(10D) | 1547 | 1272 | 2949 | 68    |
| H(12)  | 3246 | 2133 | 3084 | 41    |
| H(13A) | 4401 | 3018 | 1767 | 47    |
| H(13B) | 3256 | 1640 | 1354 | 47    |
| H(14A) | 2896 | 7817 | 2638 | 39    |
| H(14B) | 4255 | 8216 | 2839 | 39    |
| H(15)  | 4692 | 4826 | 3276 | 38    |
| H(22)  | 2486 | 2579 | 5648 | 34    |
| H(23A) | 3687 | 1623 | 7123 | 42    |
| H(23B) | 3736 | 3922 | 7588 | 42    |
| H(24A) | 2521 | 2257 | 8450 | 47    |
| H(24B) | 1891 | 954  | 7467 | 47    |
| H(25A) | 630  | 3753 | 7427 | 50    |
| H(25B) | 1677 | 5363 | 7772 | 50    |
| H(27)  | 896  | 7510 | 6358 | 44    |
| H(28A) | 2742 | 8758 | 5939 | 37    |
| H(28B) | 2952 | 7516 | 6997 | 37    |
| H(29)  | 132  | 7175 | 4594 | 55    |
| H(30)  | 1277 | 6285 | 3527 | 46    |

## 5. Computational Details on the Conformation of Enone 20

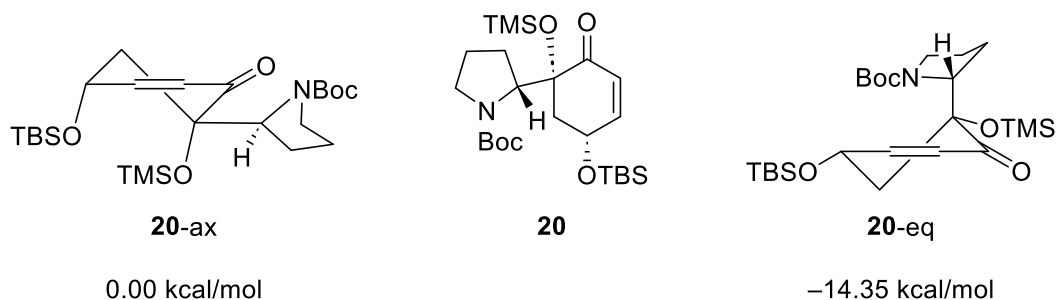

The following is absolute energies and coordinates of **20-ax** and **20-eq**

### **20-ax**

E [B3LYP-D3/6-311+G\*\*, SMD (chloroform)]: -1952.22603834 Hartree

Thermal Correction to Gibbs free energy [B3LYP-D3/6-31G\*]: 0.595190 Hartree

|    |           |           |           |
|----|-----------|-----------|-----------|
| O  | -1.537875 | 2.732642  | 4.774156  |
| C  | -1.462113 | 1.563016  | 5.106793  |
| C  | -2.326678 | 1.035221  | 6.191719  |
| C  | -1.924971 | 0.009005  | 6.952771  |
| C  | -0.569888 | -0.622098 | 6.708980  |
| O  | 0.468104  | 0.152714  | 7.302395  |
| Si | 0.616769  | 0.755691  | 8.868828  |
| C  | 2.289457  | 1.610748  | 8.871600  |
| C  | -0.721344 | 2.027979  | 9.264119  |
| C  | 0.579475  | -0.686910 | 10.130127 |
| C  | -0.830164 | -1.305449 | 10.246924 |
| C  | 0.994845  | -0.154227 | 11.519389 |
| C  | 1.576179  | -1.777963 | 9.686218  |
| C  | -0.304714 | -0.736977 | 5.205877  |
| C  | -0.499356 | 0.577011  | 4.388354  |
| O  | 0.690473  | 1.287631  | 4.176061  |
| Si | 2.293602  | 0.874111  | 3.881951  |
| C  | 3.014998  | 2.381726  | 3.030354  |
| C  | 3.204881  | 0.586700  | 5.509711  |
| C  | 2.473867  | -0.669028 | 2.806516  |
| C  | -1.138062 | 0.202281  | 2.993511  |
| H  | -0.395814 | -0.423052 | 2.489856  |
| C  | -2.521361 | -0.514727 | 3.093586  |
| C  | -3.444001 | 0.229713  | 2.109549  |
| C  | -2.844567 | 1.640797  | 2.064753  |

|   |           |           |           |
|---|-----------|-----------|-----------|
| N | -1.404034 | 1.369149  | 2.147488  |
| C | -0.496311 | 1.782479  | 1.213364  |
| O | -0.991316 | 2.820234  | 0.495744  |
| C | -0.273299 | 3.350276  | -0.666884 |
| C | -0.123827 | 2.258730  | -1.731528 |
| C | -1.212905 | 4.458077  | -1.150345 |
| C | 1.078143  | 3.935868  | -0.245766 |
| O | 0.607348  | 1.277210  | 1.044834  |
| H | -3.229691 | 1.603618  | 6.400724  |
| H | -2.509383 | -0.320699 | 7.809185  |
| H | -0.550943 | -1.634258 | 7.137502  |
| H | 2.508502  | 2.045570  | 9.853729  |
| H | 3.099733  | 0.923182  | 8.609439  |
| H | 2.293513  | 2.422813  | 8.136284  |
| H | -0.471731 | 2.560499  | 10.190532 |
| H | -0.785447 | 2.767207  | 8.457355  |
| H | -1.715910 | 1.588509  | 9.388652  |
| H | -0.834180 | -2.106472 | 11.000653 |
| H | -1.166850 | -1.754069 | 9.304747  |
| H | -1.579559 | -0.566172 | 10.555089 |
| H | 0.974027  | -0.965611 | 12.261640 |
| H | 2.011582  | 0.256017  | 11.514146 |
| H | 0.316742  | 0.631066  | 11.877413 |
| H | 1.583992  | -2.610257 | 10.405289 |
| H | 2.600217  | -1.390539 | 9.621882  |
| H | 1.318193  | -2.189837 | 8.703157  |
| H | 0.713679  | -1.100859 | 5.059331  |
| H | -0.971854 | -1.517640 | 4.825357  |
| H | 2.527700  | 2.523016  | 2.062909  |
| H | 4.094971  | 2.272471  | 2.870478  |
| H | 2.849957  | 3.280870  | 3.635187  |
| H | 2.724996  | -0.173802 | 6.132533  |
| H | 3.235798  | 1.510081  | 6.097423  |
| H | 4.240117  | 0.277531  | 5.313456  |
| H | 1.970869  | -0.517304 | 1.848196  |
| H | 2.073092  | -1.575096 | 3.277114  |
| H | 3.539022  | -0.852410 | 2.612198  |
| H | -2.924314 | -0.444638 | 4.108610  |
| H | -2.435887 | -1.579419 | 2.858184  |
| H | -4.493009 | 0.219391  | 2.422770  |
| H | -3.383027 | -0.221735 | 1.112409  |
| H | -3.161247 | 2.244699  | 2.921586  |
| H | -3.073844 | 2.189928  | 1.153489  |
| H | 0.315242  | 2.686055  | -2.640016 |
| H | -1.105147 | 1.843384  | -1.987486 |
| H | 0.519906  | 1.454034  | -1.372630 |
| H | -0.798182 | 4.943363  | -2.040079 |



|   |           |          |           |
|---|-----------|----------|-----------|
| H | -2.195101 | 4.045257 | -1.403786 |
| H | -1.346823 | 5.213129 | -0.369096 |
| H | 1.502075  | 4.512606 | -1.075849 |
| H | 1.777677  | 3.147338 | 0.030429  |
| H | 0.946618  | 4.606117 | 0.610005  |

## 20-eq

E [B3LYP-D3/6-311+G\*\*, SMD (chloroform)]: -1952.24984409 Hartree

Thermal Correction to Gibbs free energy [B3LYP-D3/6-31G\*]: 0.594555 Hartree

|    |           |          |           |
|----|-----------|----------|-----------|
| C  | 1.031777  | 6.059483 | 5.299150  |
| H  | 2.026992  | 5.746404 | 5.620995  |
| H  | 1.019301  | 7.154946 | 5.273968  |
| C  | -0.033865 | 5.605723 | 6.304953  |
| H  | 0.108530  | 4.536161 | 6.506835  |
| C  | -1.418352 | 5.786352 | 5.751769  |
| H  | -2.220232 | 5.802915 | 6.487328  |
| C  | -1.685235 | 5.912682 | 4.440715  |
| H  | -2.697638 | 6.046606 | 4.068975  |
| C  | -0.624875 | 5.950961 | 3.418821  |
| C  | 0.794495  | 5.544262 | 3.866363  |
| C  | 0.889083  | 3.982261 | 3.764187  |
| H  | 0.173976  | 3.533809 | 4.457242  |
| C  | 0.671730  | 3.493960 | 2.301588  |
| H  | 0.611853  | 4.352595 | 1.631091  |
| H  | -0.265374 | 2.937873 | 2.208599  |
| N  | 2.236443  | 3.502800 | 4.111048  |
| O  | 0.065101  | 6.348091 | 7.515713  |
| Si | 1.017605  | 5.916747 | 8.838362  |
| C  | 0.636456  | 4.147512 | 9.364934  |
| H  | 1.226409  | 3.870564 | 10.247670 |
| H  | 0.886590  | 3.445718 | 8.562139  |
| H  | -0.422592 | 4.019404 | 9.616933  |
| C  | 2.848744  | 6.067410 | 8.406608  |
| H  | 3.480118  | 5.882440 | 9.284533  |
| H  | 3.089017  | 7.064373 | 8.020756  |
| H  | 3.123420  | 5.331751 | 7.644118  |
| C  | 0.514432  | 7.186197 | 10.166807 |
| C  | 1.306286  | 6.931913 | 11.466399 |
| H  | 1.018682  | 7.660517 | 12.238352 |
| H  | 2.388559  | 7.030483 | 11.313931 |
| H  | 1.113903  | 5.931727 | 11.875172 |
| C  | -0.995837 | 7.059431 | 10.455880 |
| H  | -1.306440 | 7.801574 | 11.206080 |

|    |           |           |           |
|----|-----------|-----------|-----------|
| H  | -1.253909 | 6.068624  | 10.850562 |
| H  | -1.590749 | 7.227765  | 9.551115  |
| C  | 0.811455  | 8.611895  | 9.656484  |
| H  | 0.502906  | 9.358530  | 10.403141 |
| H  | 0.272252  | 8.823787  | 8.726346  |
| H  | 1.881764  | 8.762383  | 9.467601  |
| O  | -0.863659 | 6.282944  | 2.263607  |
| O  | 1.800971  | 6.051433  | 3.026612  |
| Si | 1.999178  | 7.425848  | 2.074772  |
| C  | 3.843330  | 7.786606  | 2.233013  |
| H  | 4.139996  | 8.636848  | 1.606175  |
| H  | 4.439671  | 6.919614  | 1.923757  |
| H  | 4.111402  | 8.020767  | 3.269998  |
| C  | 1.585417  | 7.034586  | 0.281295  |
| H  | 1.845982  | 7.871329  | -0.379315 |
| H  | 0.518028  | 6.822625  | 0.176092  |
| H  | 2.145294  | 6.155059  | -0.060622 |
| C  | 1.005624  | 8.895598  | 2.714001  |
| H  | 1.275497  | 9.800133  | 2.153832  |
| H  | 1.211871  | 9.094016  | 3.772829  |
| H  | -0.070082 | 8.735327  | 2.596195  |
| C  | 2.502024  | 2.990073  | 5.345658  |
| O  | 1.720211  | 3.041534  | 6.294259  |
| O  | 3.735597  | 2.437008  | 5.393501  |
| C  | 4.194990  | 1.695898  | 6.576052  |
| C  | 4.298350  | 2.627668  | 7.786859  |
| H  | 4.805416  | 2.106471  | 8.606722  |
| H  | 3.312446  | 2.944031  | 8.126814  |
| H  | 4.885627  | 3.515780  | 7.530645  |
| C  | 3.270028  | 0.503778  | 6.839332  |
| H  | 3.686101  | -0.113689 | 7.643074  |
| H  | 3.186997  | -0.115513 | 5.939301  |
| H  | 2.274119  | 0.839669  | 7.131895  |
| C  | 5.583407  | 1.221794  | 6.139809  |
| H  | 6.051519  | 0.639875  | 6.940478  |
| H  | 6.225212  | 2.077971  | 5.908373  |
| H  | 5.511437  | 0.592143  | 5.246925  |
| C  | 1.904013  | 2.631921  | 1.964377  |
| H  | 1.720582  | 1.579194  | 2.210800  |
| C  | 2.993233  | 3.185180  | 2.891357  |
| H  | 2.180703  | 2.688804  | 0.906905  |
| H  | 3.790376  | 2.477760  | 3.112949  |
| H  | 3.427739  | 4.106471  | 2.491246  |

## 6. Attempted Optimization of Reductive Heck Reaction Between 22 and 28.

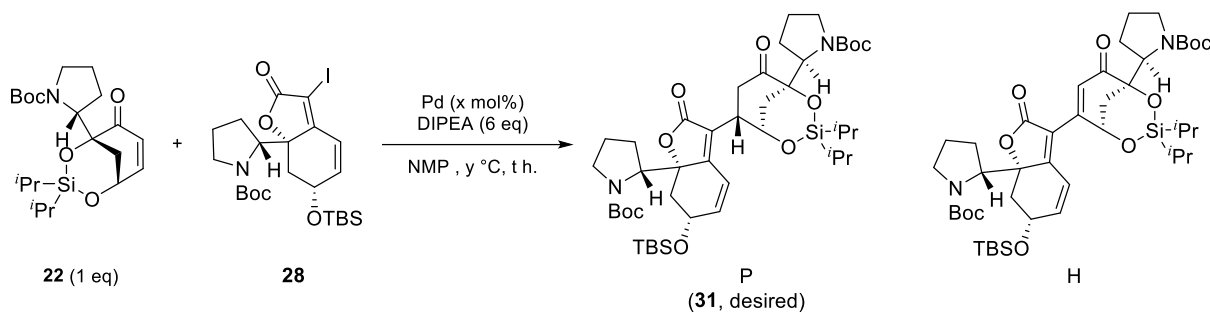

| Entry | Pd                   | 28  | x  | y   | t     | Note                             | Crude ratio (31 : H) | Yield of P |
|-------|----------------------|-----|----|-----|-------|----------------------------------|----------------------|------------|
| 1     | Pd(TFA) <sub>2</sub> | 3eq | 5  | 80  | 24    |                                  | 1 : 0.2              | 13%        |
| 2     | Pd(TFA) <sub>2</sub> | 2eq | 2  | 90  | 19    | AgTFA as an additive             | -                    | 0%         |
| 3     | Pd(TFA) <sub>2</sub> | 3eq | 5  | 90  | 49+37 | 2 cycles                         | 1 : 0.5              | 37%        |
| 4     | Pd(TFA) <sub>2</sub> | 3eq | 10 | 90  | 48    | 2.5 mol%/12h stepwise Pdaddition | 1 : 0.7              | 35%        |
| 5     | Pd(TFA) <sub>2</sub> | 3eq | 10 | 90  | 37    |                                  | 1 : 0.4              | 30%        |
| 6     | Pd(TFA) <sub>2</sub> | 3eq | 5  | 110 | 24    |                                  | 1 : 0.8              | 30%        |
| 7     | BrettPhos Pd G3      | 3eq | 5  | 90  | 48    |                                  | 1 : 1.2              | 17%        |
| 8     | Pd(OAc) <sub>2</sub> | 3eq | 5  | 90  | 48    |                                  | 1 : 0.2              | 35 %       |
| 9     | Pd(OAc) <sub>2</sub> | 3eq | 5  | 80  | 24    |                                  | 1 : 0.7              | 16 %       |

## 7. Supplemental References

- 1 W. C. Still, M. Kahn and A. Mitra, Rapid chromatographic technique for preparative separations with moderate resolution, *J. Org. Chem.*, 1978, **43**, 2923–2925.
- 2 D. Seebach, R. Imwinkelried and G. Stucky, Optisch aktive Alkohole aus 1,3-Dioxan-4-onen: eine praktikable Variante der enantioselektiven Synthese unter nucleophiler Substitution an Acetal-Zentren, *Helv. Chim. Acta*, 1987, **70**, 448–464.
- 3 A. B. Pangborn, M. A. Giardello, R. H. Grubbs, R. K. Rosen and F. J. Timmers, Safe and Convenient Procedure for Solvent Purification, *Organometallics*, 1996, **15**, 1518–1520.
- 4 Gaussian 09, Revision D.01, M. J. Frisch, H. B. Schlegel, G. E. Scuseria, M. A. Robb, J. R. Cheeseman, G. Scalmani, V. Barone, B. Mennucci, G. A. Petersson, H. Nakatsuji, M. Caricato, X. Li, H. P. Hratchian, A. F. Izmaylov, J. Bloino, G. Zheng, J. L. Sonnenberg, M. Hada, M. Ehara, K. Toyota, R. Fukuda, J. Hasegawa, M. Ishida, T. Nakajima, Y. Honda, O. Kitao, H. Nakai, T. Vreven, J. A. Montgomery, Jr., J. E. Peralta, F. Ogliaro, M. Bearpark, J. J. Heyd, E. Brothers, K. N. Kudin, V. N. Staroverov, T. Keith, R. Kobayashi, J. Normand, K. Raghavachari, A. Rendell, J. C. Burant, S. S. Iyengar, J. Tomasi, M. Cossi, N. Rega, J. M. Millam, M. Klene, J. E. Knox, J. B. Cross, V. Bakken, C. Adamo, J. Jaramillo, R. Gomperts, R. E. Stratmann, O. Yazyev, A. J. Austin, R. Cammi, C. Pomelli, J. W. Ochterski, R. L. Martin, K. Morokuma, V. G. Zakrzewski, G. A. Voth, P. Salvador, J. J. Dannenberg, S. Dapprich, A. D. Daniels, O. Farkas, J. B. Foresman, J. V. Ortiz, J. Cioslowski, and D. J. Fox, Gaussian, Inc., Wallingford CT, 2013.
- 5 (a) A. D. Becke, Density-functional thermochemistry. III. The role of exact exchange, *J. Chem. Phys.*, 1993, **98**, 5648–5652. (b) C. Lee, W. Yang and R. G. Parr, Development of the Colle-Salvetti correlation-energy formula into a functional of the electron density, *Phys. Rev. B*, 1988, **37**, 785–789.
- 6 (a) S. Grimme, J. Antony, S. Ehrlich and H. Krieg, A consistent and accurate ab initio parametrization of density functional dispersion correction (DFT-D) for the 94 elements H-Pu, *J. Chem. Phys.*, 2010, **132**, 154104. (b) S. Grimme, S. Ehrlich and L. Goerigk, Effect of the damping function in dispersion corrected density functional theory, *J. Comput. Chem.*, 2011, **32**, 1456–1465. (c) D. G. A. Smith, L. A. Burns, K. Patkowski and C. D. Sherrill, Revised Damping Parameters for the D3 Dispersion Correction to Density Functional Theory, *J. Phys. Chem. Lett.*, 2016, **7**, 2197–2203.
- 7 A. V. Marenich, C. J. Cramer and D. G. Truhlar, Universal Solvation Model Based on Solute Electron Density and on a Continuum Model of the Solvent Defined by the Bulk Dielectric Constant and Atomic Surface Tensions, *J. Phys. Chem. B*, 2009, **113**, 6378–6396.
- 8 S. Jeon and S. Han, An Accelerated Intermolecular Rauhut–Currier Reaction Enables the Total Synthesis of (–)-Flueggeine C, *J. Am. Chem. Soc.*, 2017, **139**, 6302–6305.
- 9 S. Mannathan, S. Raoufmoghaddam, J. N. H. Reek, J. G. de Vries and A. J. Minnaard, Palladium(II) Acetate Catalyzed Reductive Heck Reaction of Enones; A Practical Approach, *ChemCatChem*, 2015, **7**, 3923–3927.

- 10 K. Graf, C. L. Rühl, M. Rudolph, F. Rominger and A. S. K. Hashmi, Metal-Free Oxidative Cyclization of Alkynyl Aryl Ethers to Benzofuranones, *Angew. Chem. Int. Ed.*, 2013, **52**, 12727–12731.
- 11 L.-S. Gan, C.-Q. Fan, S.-P. Yang, Y. Wu, L.-P. Lin, J. Ding and J.-M. Yue, Flueggenines A and B, Two Novel C,C-Linked Dimeric Indolizidine Alkaloids from *Flueggea virosa*, *Org. Lett.*, 2006, **8**, 2285–2288.

## 8. Copies of NMR Spectra of Newly Synthesized Compounds

— 7.24 CDCl<sub>3</sub>

6.70  
6.70  
6.68  
6.68  
5.89  
5.89  
5.87  
5.39  
5.38  
5.37  
5.36  
4.06  
4.05  
4.04  
3.61  
3.60  
3.58  
3.58  
3.56  
3.23  
3.22  
3.21  
3.20  
3.20  
3.19  
3.18  
2.55  
2.55  
2.54  
2.54  
2.53  
2.52  
2.51  
1.97  
1.96  
1.95  
1.94  
1.94  
1.93  
1.93  
1.92  
1.90  
1.85  
1.83  
1.82  
1.80  
1.80  
1.78  
1.76  
1.75  
1.66  
1.65  
1.64  
1.63  
1.62  
1.60  
1.59  
1.53  
1.51  
1.49  
1.47  
1.44  
1.086  
1.014  
1.010  
1.017

| Parameter                | Value               |
|--------------------------|---------------------|
| 1 Origin                 | Bruker BioSpin GmbH |
| 2 Instrument             | Avance              |
| 3 Solvent                | CDCl <sub>3</sub>   |
| 4 Temperature            | 298.0               |
| 5 Experiment             | 1D                  |
| 6 Spectrometer Frequency | 500.23              |
| 7 Nucleus                | <sup>1</sup> H      |

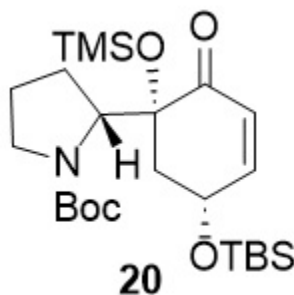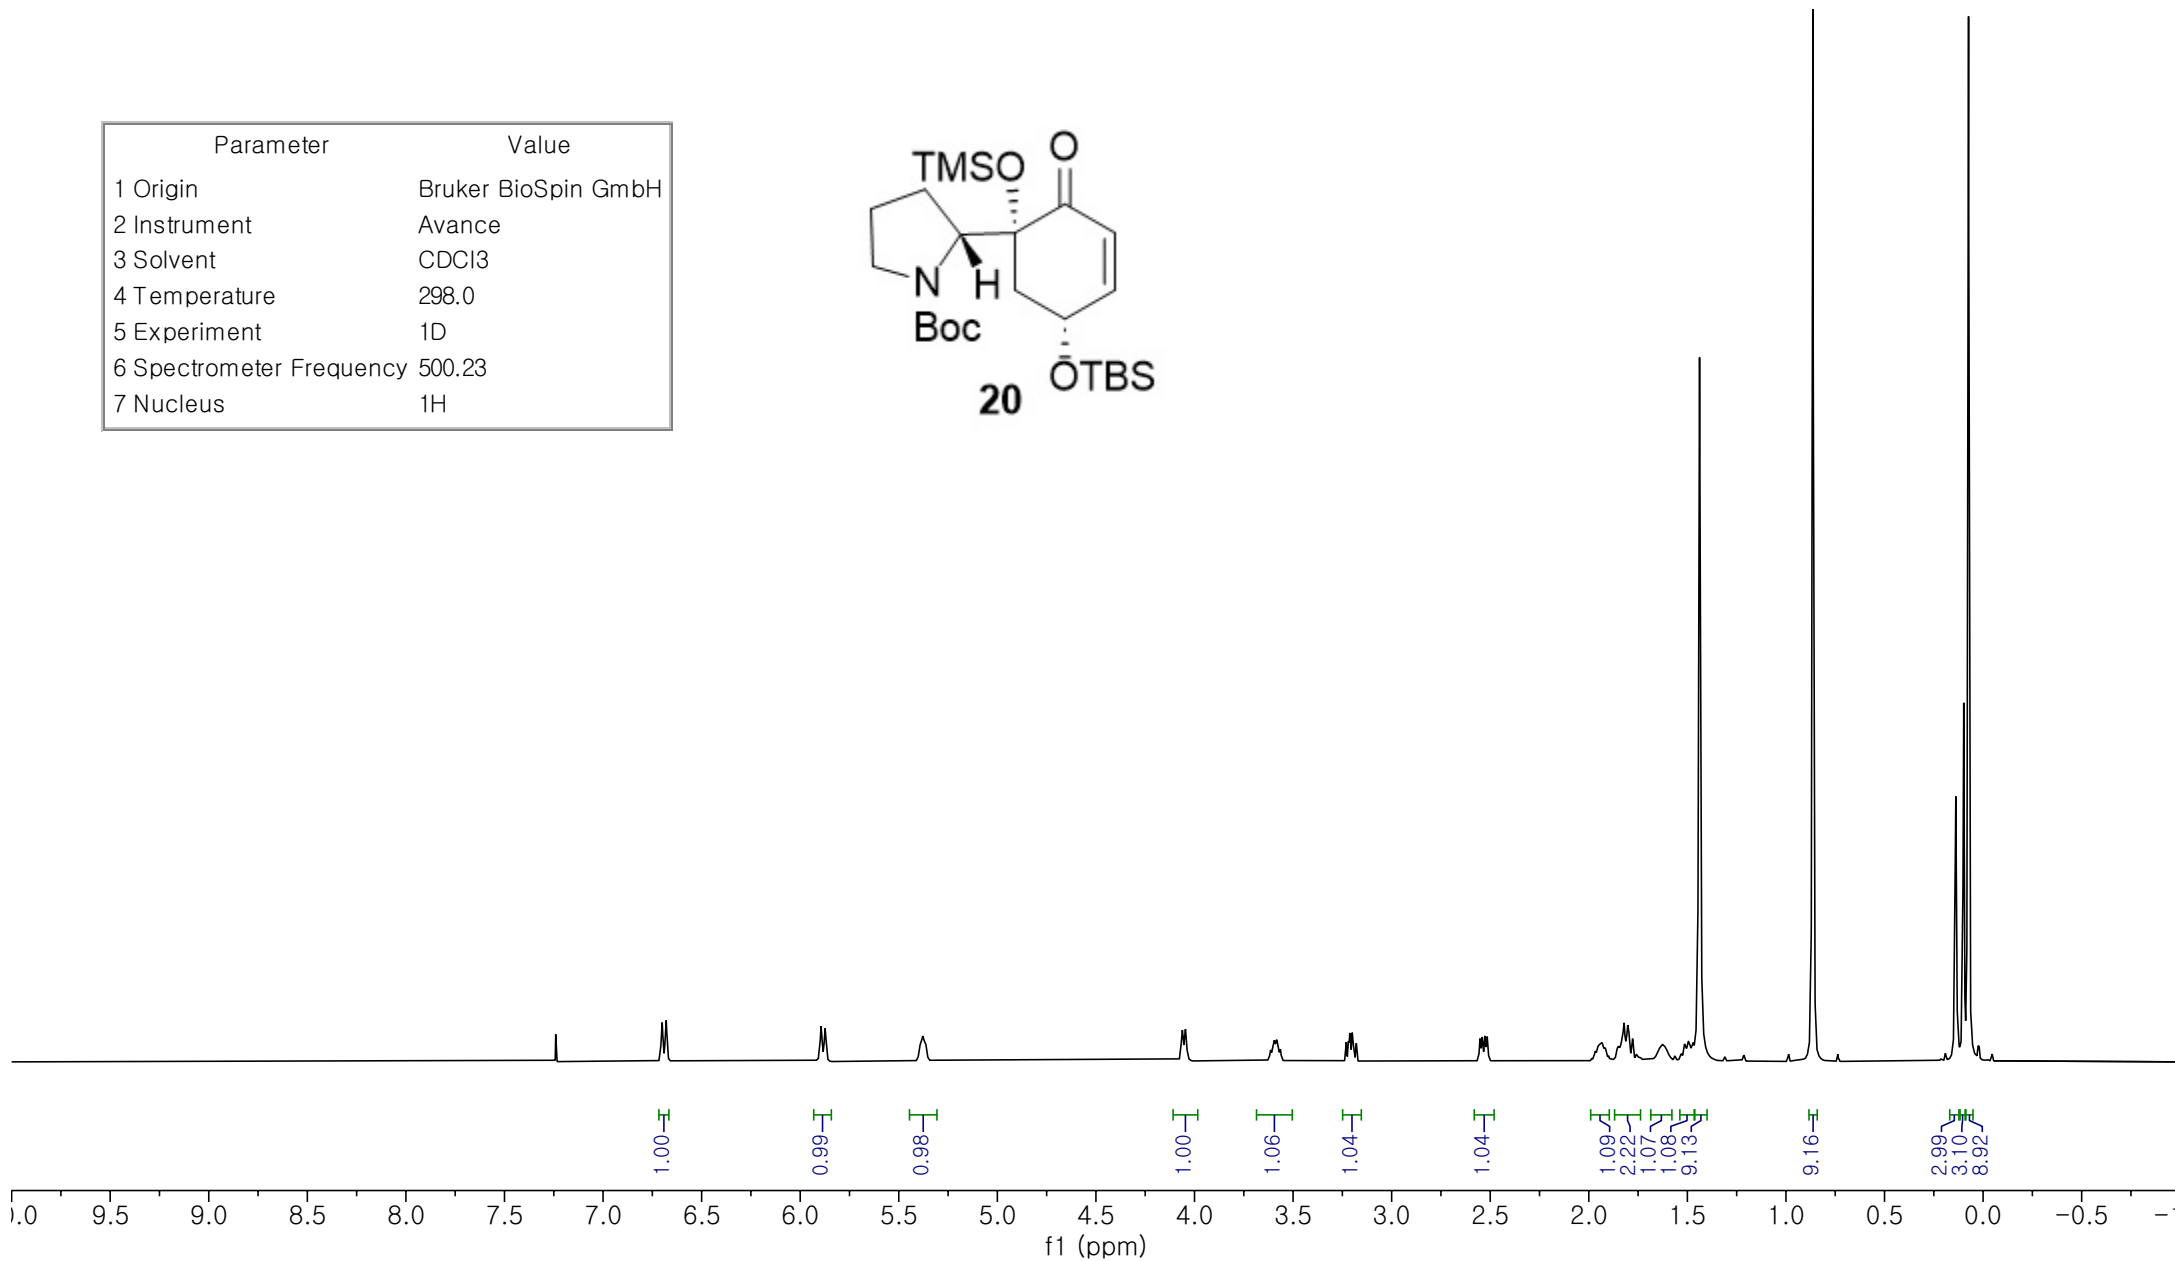

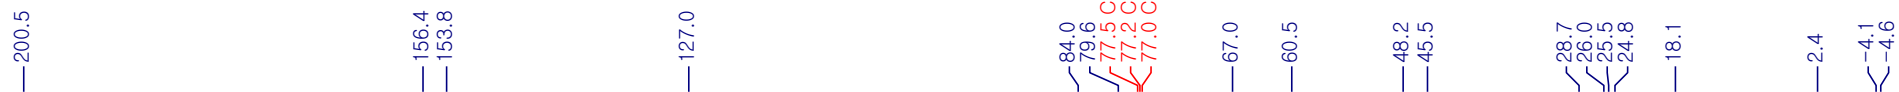

| Parameter                | Value               |
|--------------------------|---------------------|
| 1 Origin                 | Bruker BioSpin GmbH |
| 2 Instrument             | Avance              |
| 3 Solvent                | CDCl3               |
| 4 Temperature            | 298.3               |
| 5 Experiment             | 1D                  |
| 6 Spectrometer Frequency | 125.80              |
| 7 Nucleus                | 13C                 |

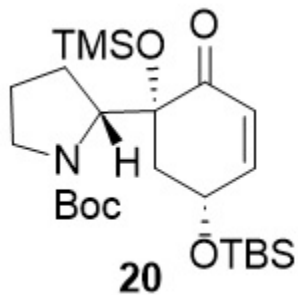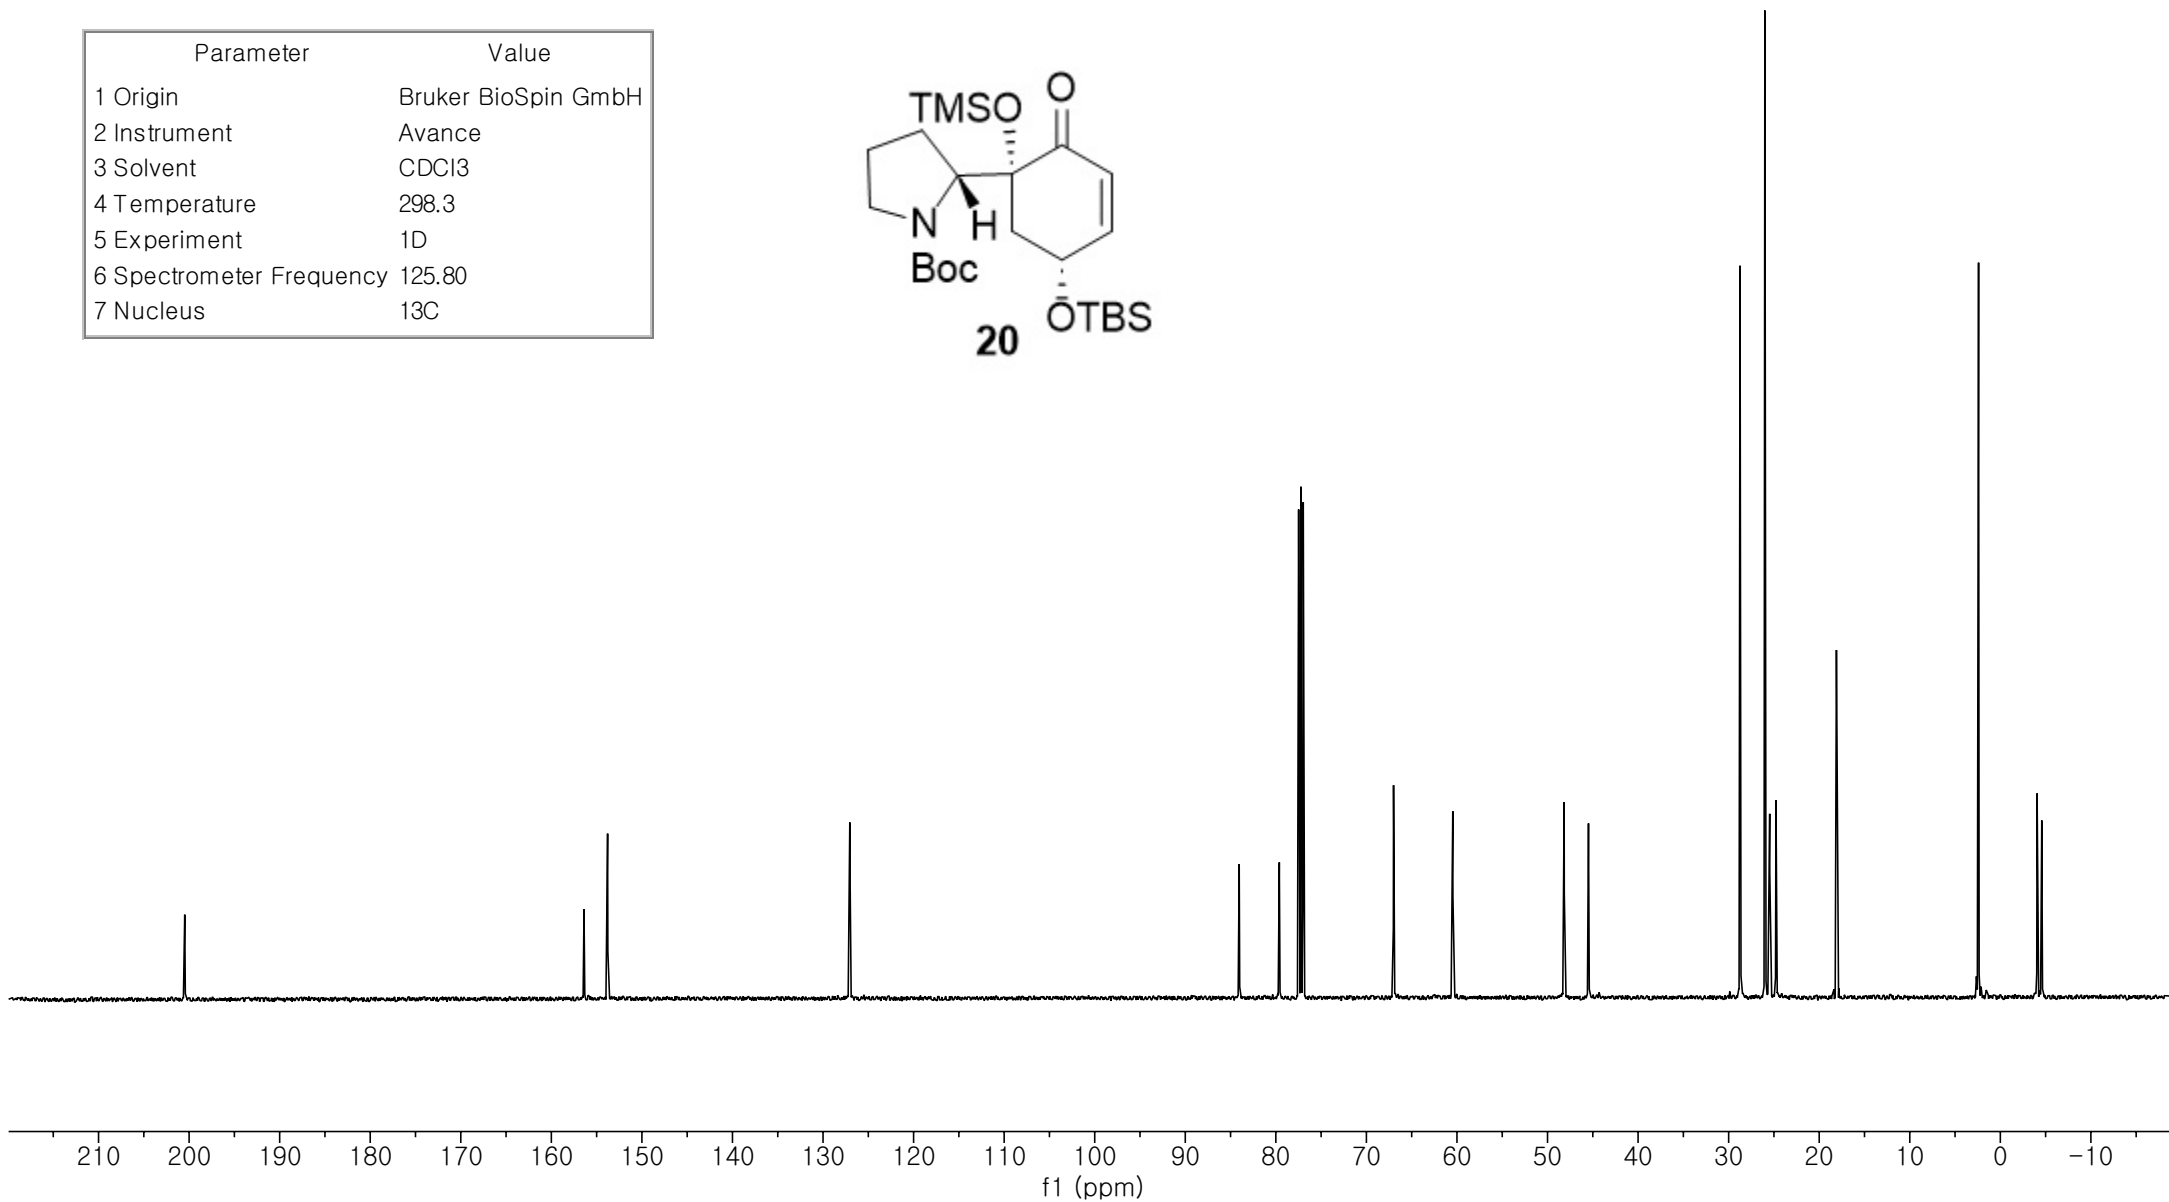



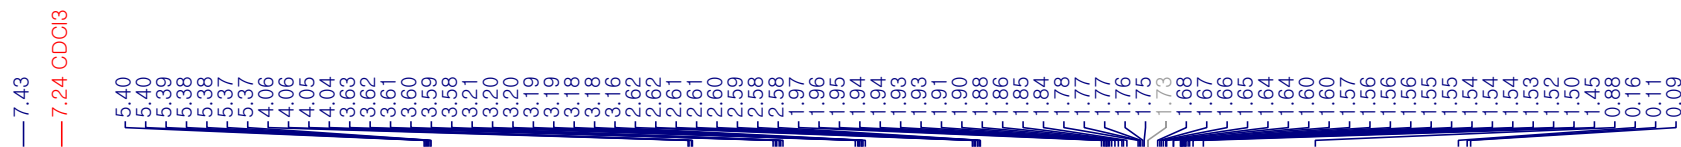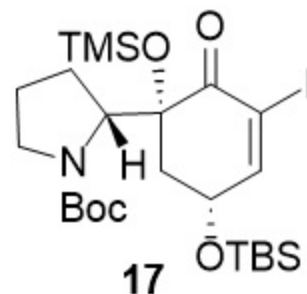

| Parameter                | Value               |
|--------------------------|---------------------|
| 1 Origin                 | Bruker BioSpin GmbH |
| 2 Instrument             | Avance              |
| 3 Solvent                | CDCl3               |
| 4 Temperature            | 298.0               |
| 5 Experiment             | 1D                  |
| 6 Spectrometer Frequency | 500.23              |
| 7 Nucleus                | 1H                  |

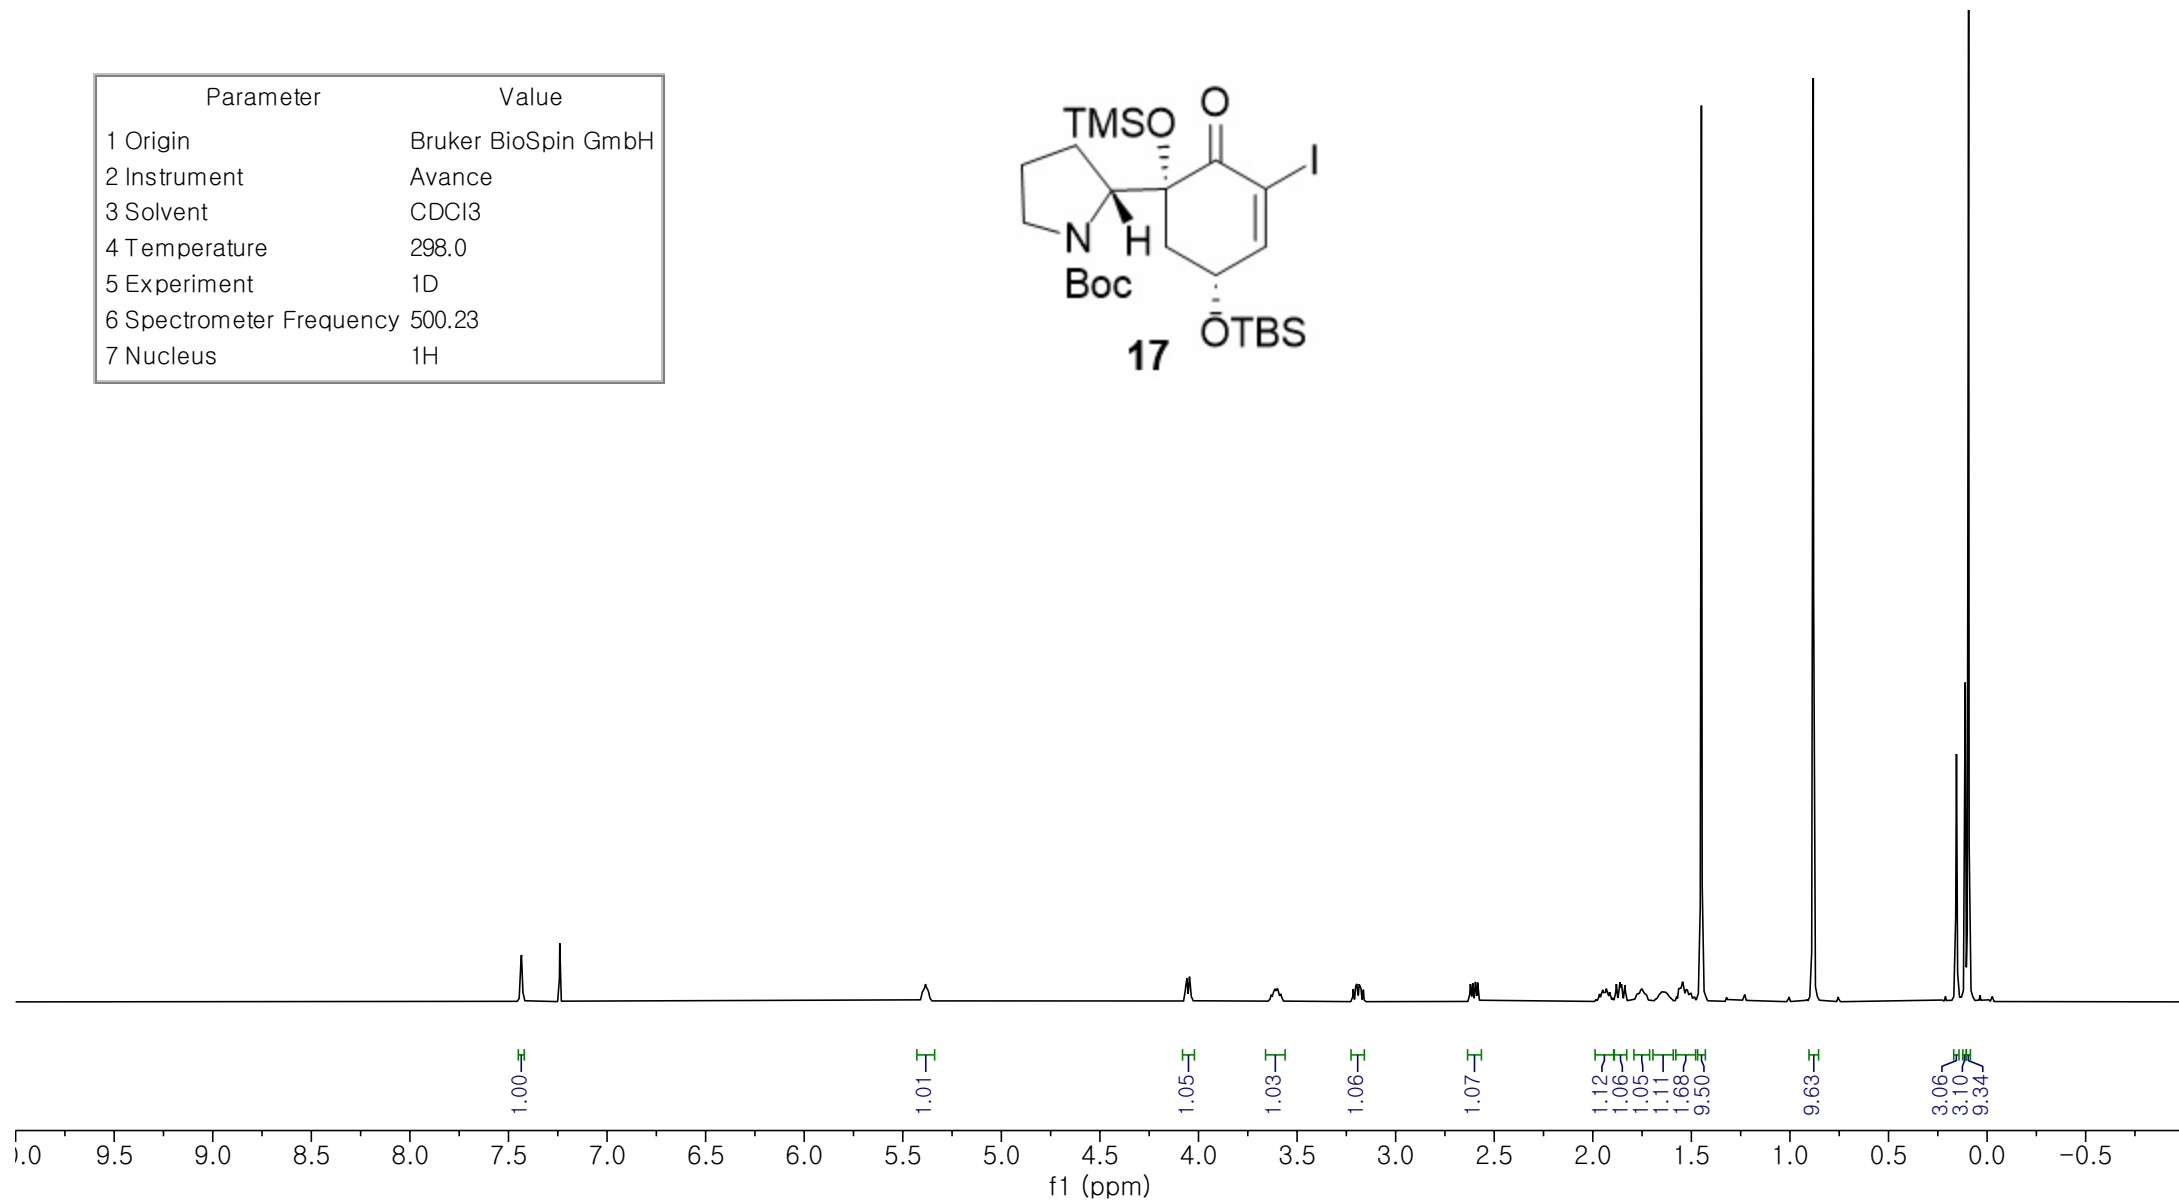

— 195.0

— 162.2

— 156.4

— 101.0

— 83.2

— 79.9

— 77.5 CDCl<sub>3</sub>

— 77.2 CDCl<sub>3</sub>

— 77.0 CDCl<sub>3</sub>

— 68.8

— 60.6

— 48.2

— 45.3

— 28.7

— 26.0

— 25.8

— 24.8

— 18.1

— 2.3

— 4.1

— 4.6

| Parameter                | Value               |
|--------------------------|---------------------|
| 1 Origin                 | Bruker BioSpin GmbH |
| 2 Instrument             | Avance              |
| 3 Solvent                | CDCl <sub>3</sub>   |
| 4 Temperature            | 298.2               |
| 5 Experiment             | 1D                  |
| 6 Spectrometer Frequency | 125.80              |
| 7 Nucleus                | 13C                 |

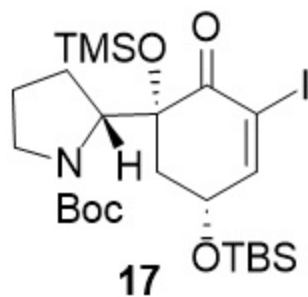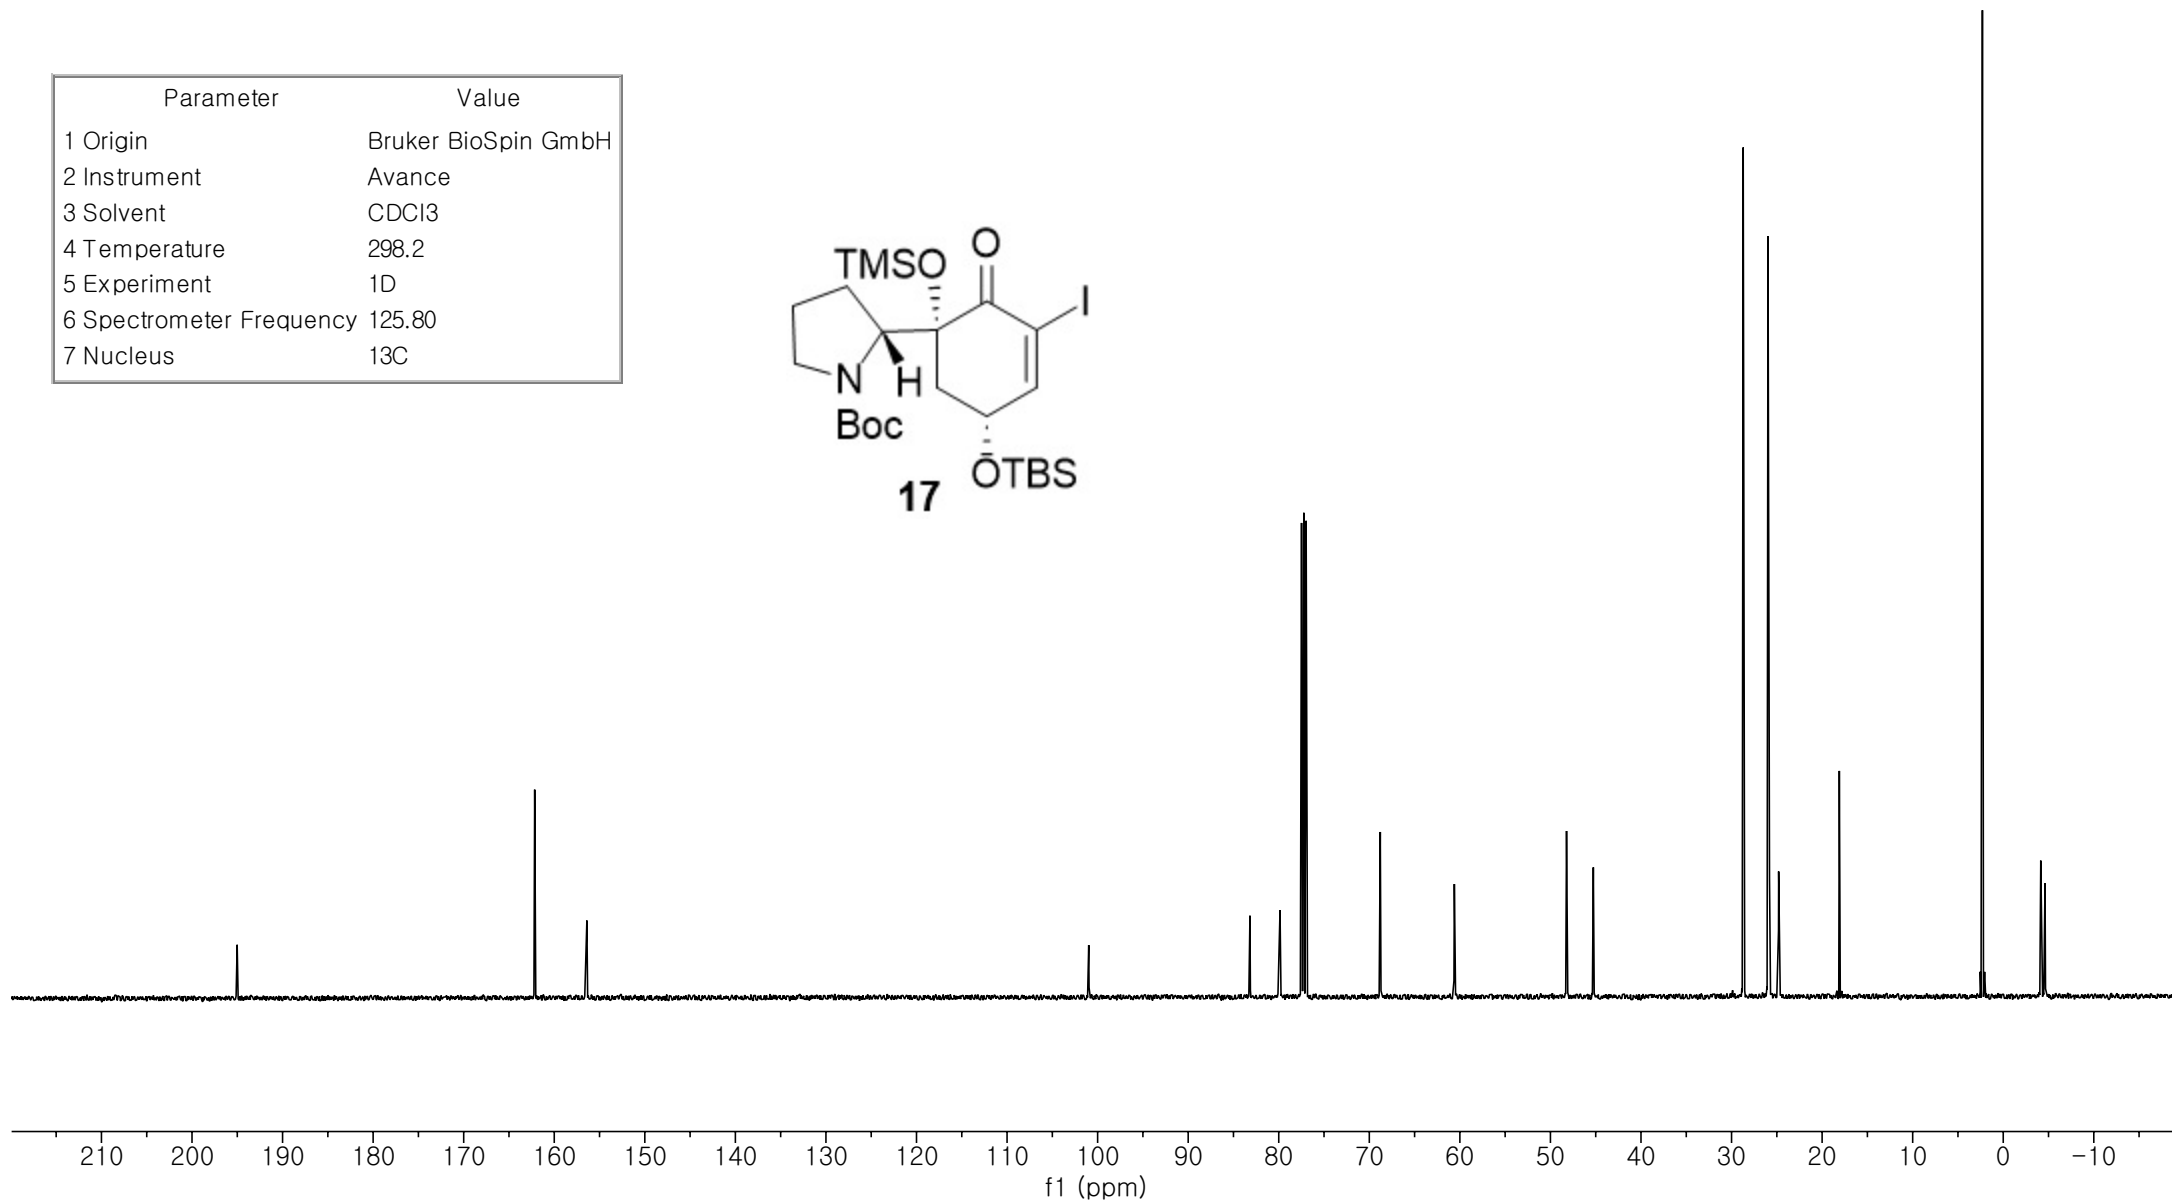

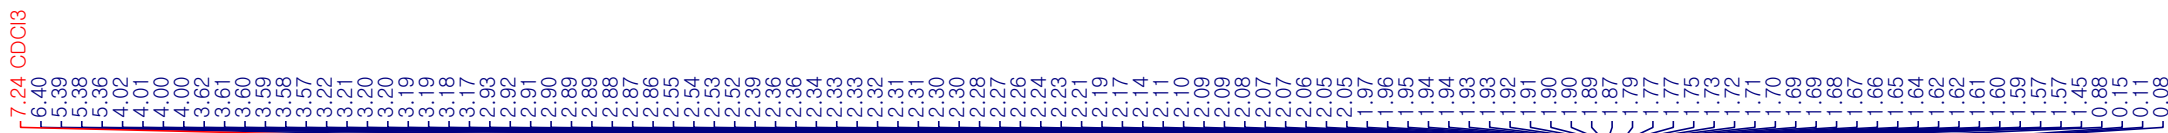

| Parameter                | Value                        |
|--------------------------|------------------------------|
| 1 Origin                 | Bruker BioSpin GmbH & Co. KG |
| 2 Instrument             | Avance                       |
| 3 Solvent                | CDCl3                        |
| 4 Temperature            | 298.0                        |
| 5 Experiment             | 1D                           |
| 6 Spectrometer Frequency | 500.23                       |
| 7 Nucleus                | 1H                           |

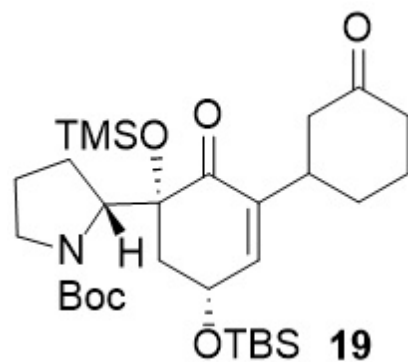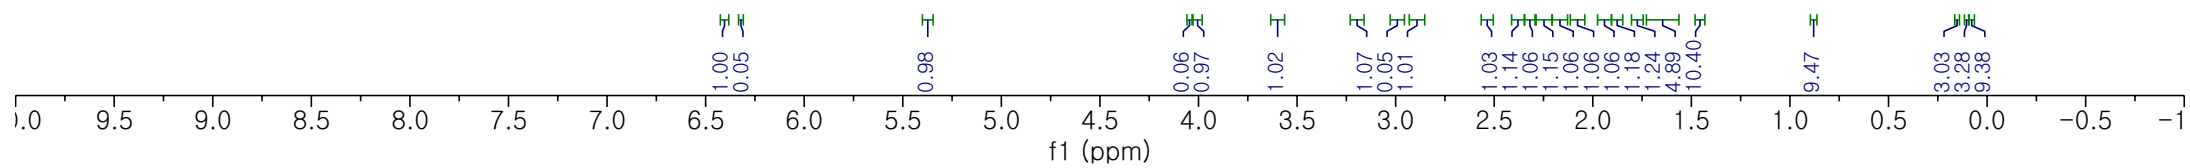

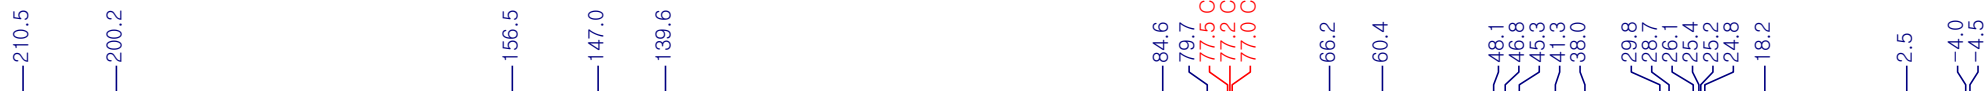

| Parameter                | Value                        |
|--------------------------|------------------------------|
| 1 Origin                 | Bruker BioSpin GmbH & Co. KG |
| 2 Instrument             | Avance                       |
| 3 Solvent                | CDCl3                        |
| 4 Temperature            | 298.2                        |
| 5 Experiment             | 1D                           |
| 6 Spectrometer Frequency | 125.80                       |
| 7 Nucleus                | 13C                          |

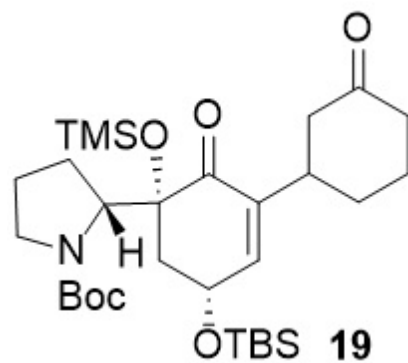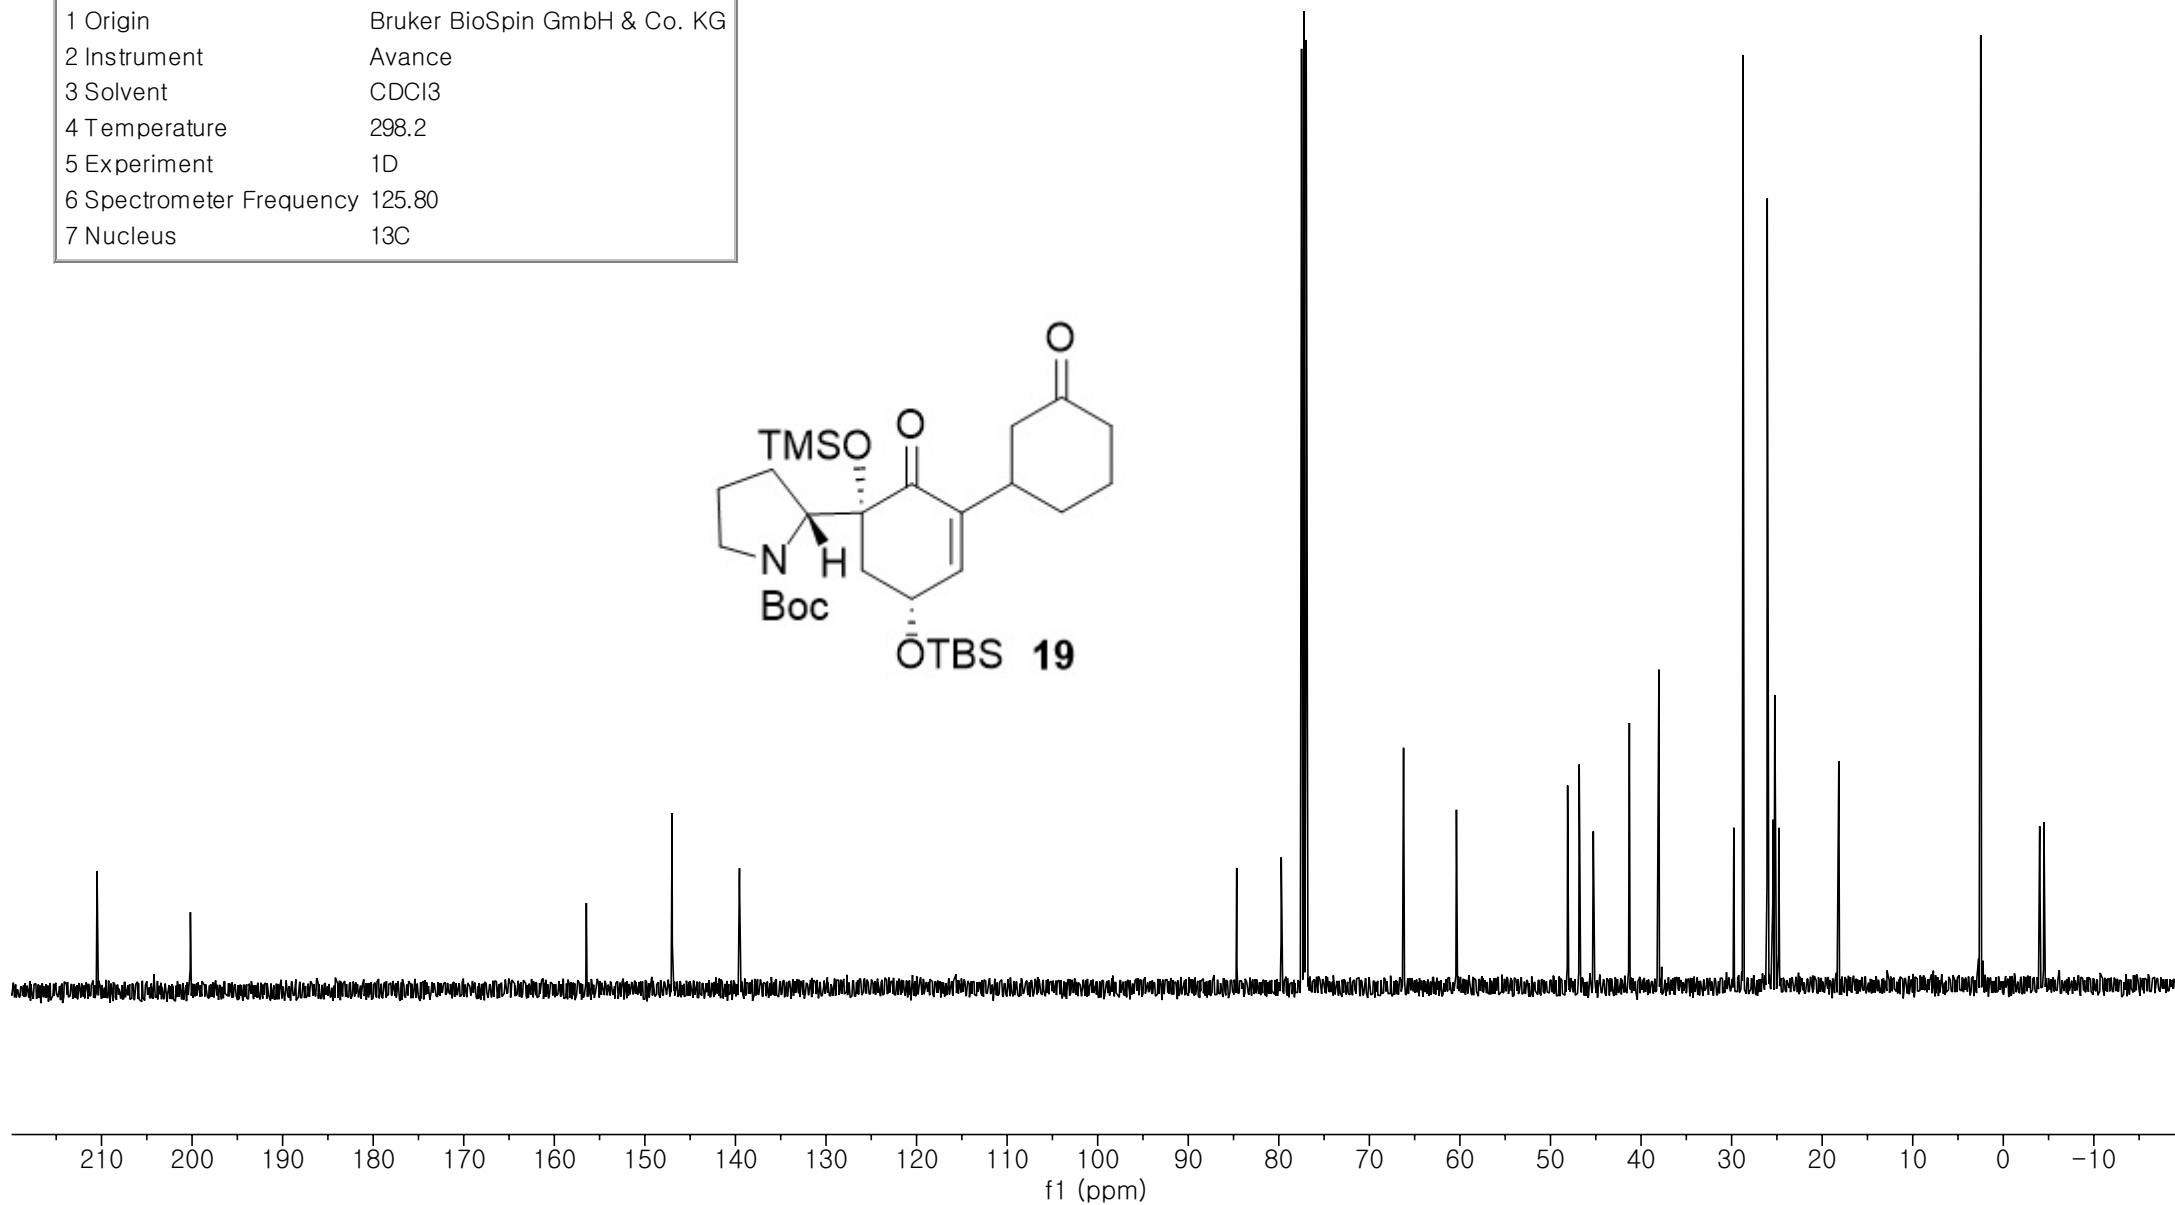

7.24 CDCl<sub>3</sub>

6.97  
6.96  
6.95  
6.94  
5.95  
5.93  
4.56  
4.56  
4.56  
4.54  
4.13  
4.12  
4.11  
4.11  
3.45  
3.27  
3.26  
3.25  
3.25  
3.24  
3.24  
3.23  
3.22  
2.45  
2.42  
2.33  
2.31  
2.27  
2.26  
2.25  
2.25  
2.24  
2.24  
2.23  
2.22  
2.21  
2.09  
2.08  
2.07  
2.06  
2.05  
2.04  
2.03  
2.02  
1.97  
1.95  
1.94  
1.94  
1.93  
1.92  
1.91  
1.90  
1.89  
1.88  
1.75  
1.74  
1.73  
1.72  
1.71  
1.70  
1.69  
1.41  
1.02  
1.02  
1.01  
1.00  
0.94  
0.93  
0.92  
0.91  
0.90  
0.89  
0.88  
0.87

| Parameter                | Value               |
|--------------------------|---------------------|
| 1 Origin                 | Bruker BioSpin GmbH |
| 2 Instrument             | Avance              |
| 3 Solvent                | CDCl <sub>3</sub>   |
| 4 Temperature            | 298.0               |
| 5 Experiment             | 1D                  |
| 6 Spectrometer Frequency | 500.23              |
| 7 Nucleus                | <sup>1</sup> H      |

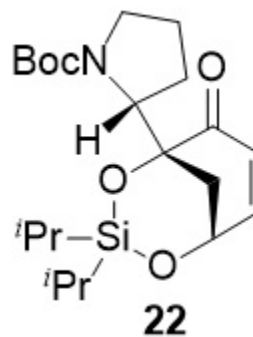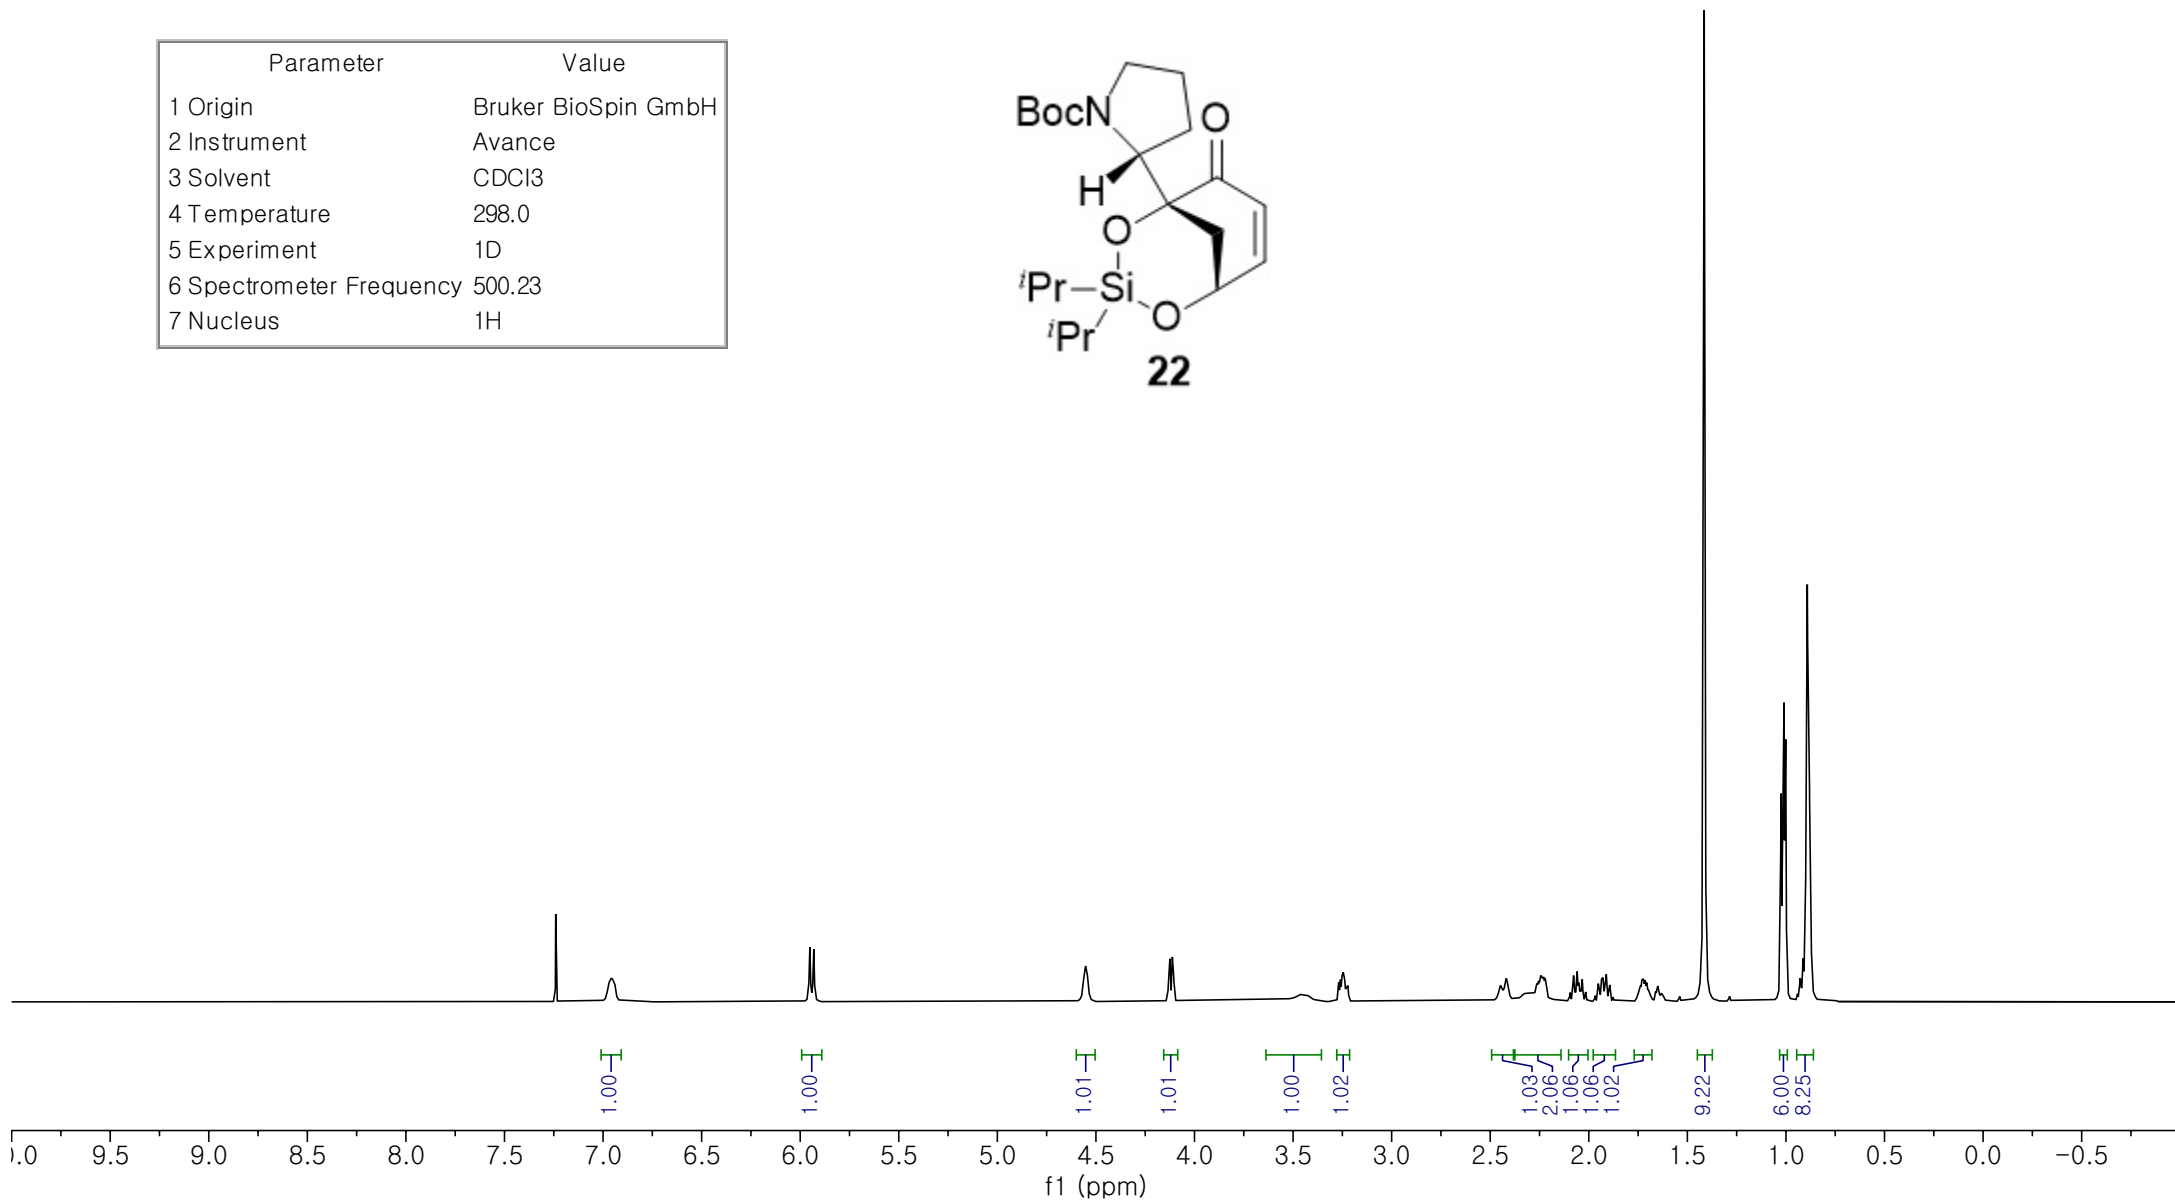

— 196.7

— 156.4

— 146.1

— 128.2

79.4  
 78.4  
 77.5 CDCl<sub>3</sub>  
 77.2 CDCl<sub>3</sub>  
 77.0 CDCl<sub>3</sub>

— 64.0  
 — 61.0

— 48.2

— 38.9

28.6  
 28.1  
 25.0  
 17.2  
 16.9  
 16.8  
 16.6  
 14.4  
 14.0

| Parameter                | Value               |
|--------------------------|---------------------|
| 1 Origin                 | Bruker BioSpin GmbH |
| 2 Instrument             | Avance              |
| 3 Solvent                | CDCl <sub>3</sub>   |
| 4 Temperature            | 298.0               |
| 5 Experiment             | 1D                  |
| 6 Spectrometer Frequency | 125.80              |
| 7 Nucleus                | 13C                 |

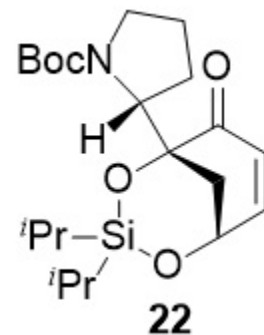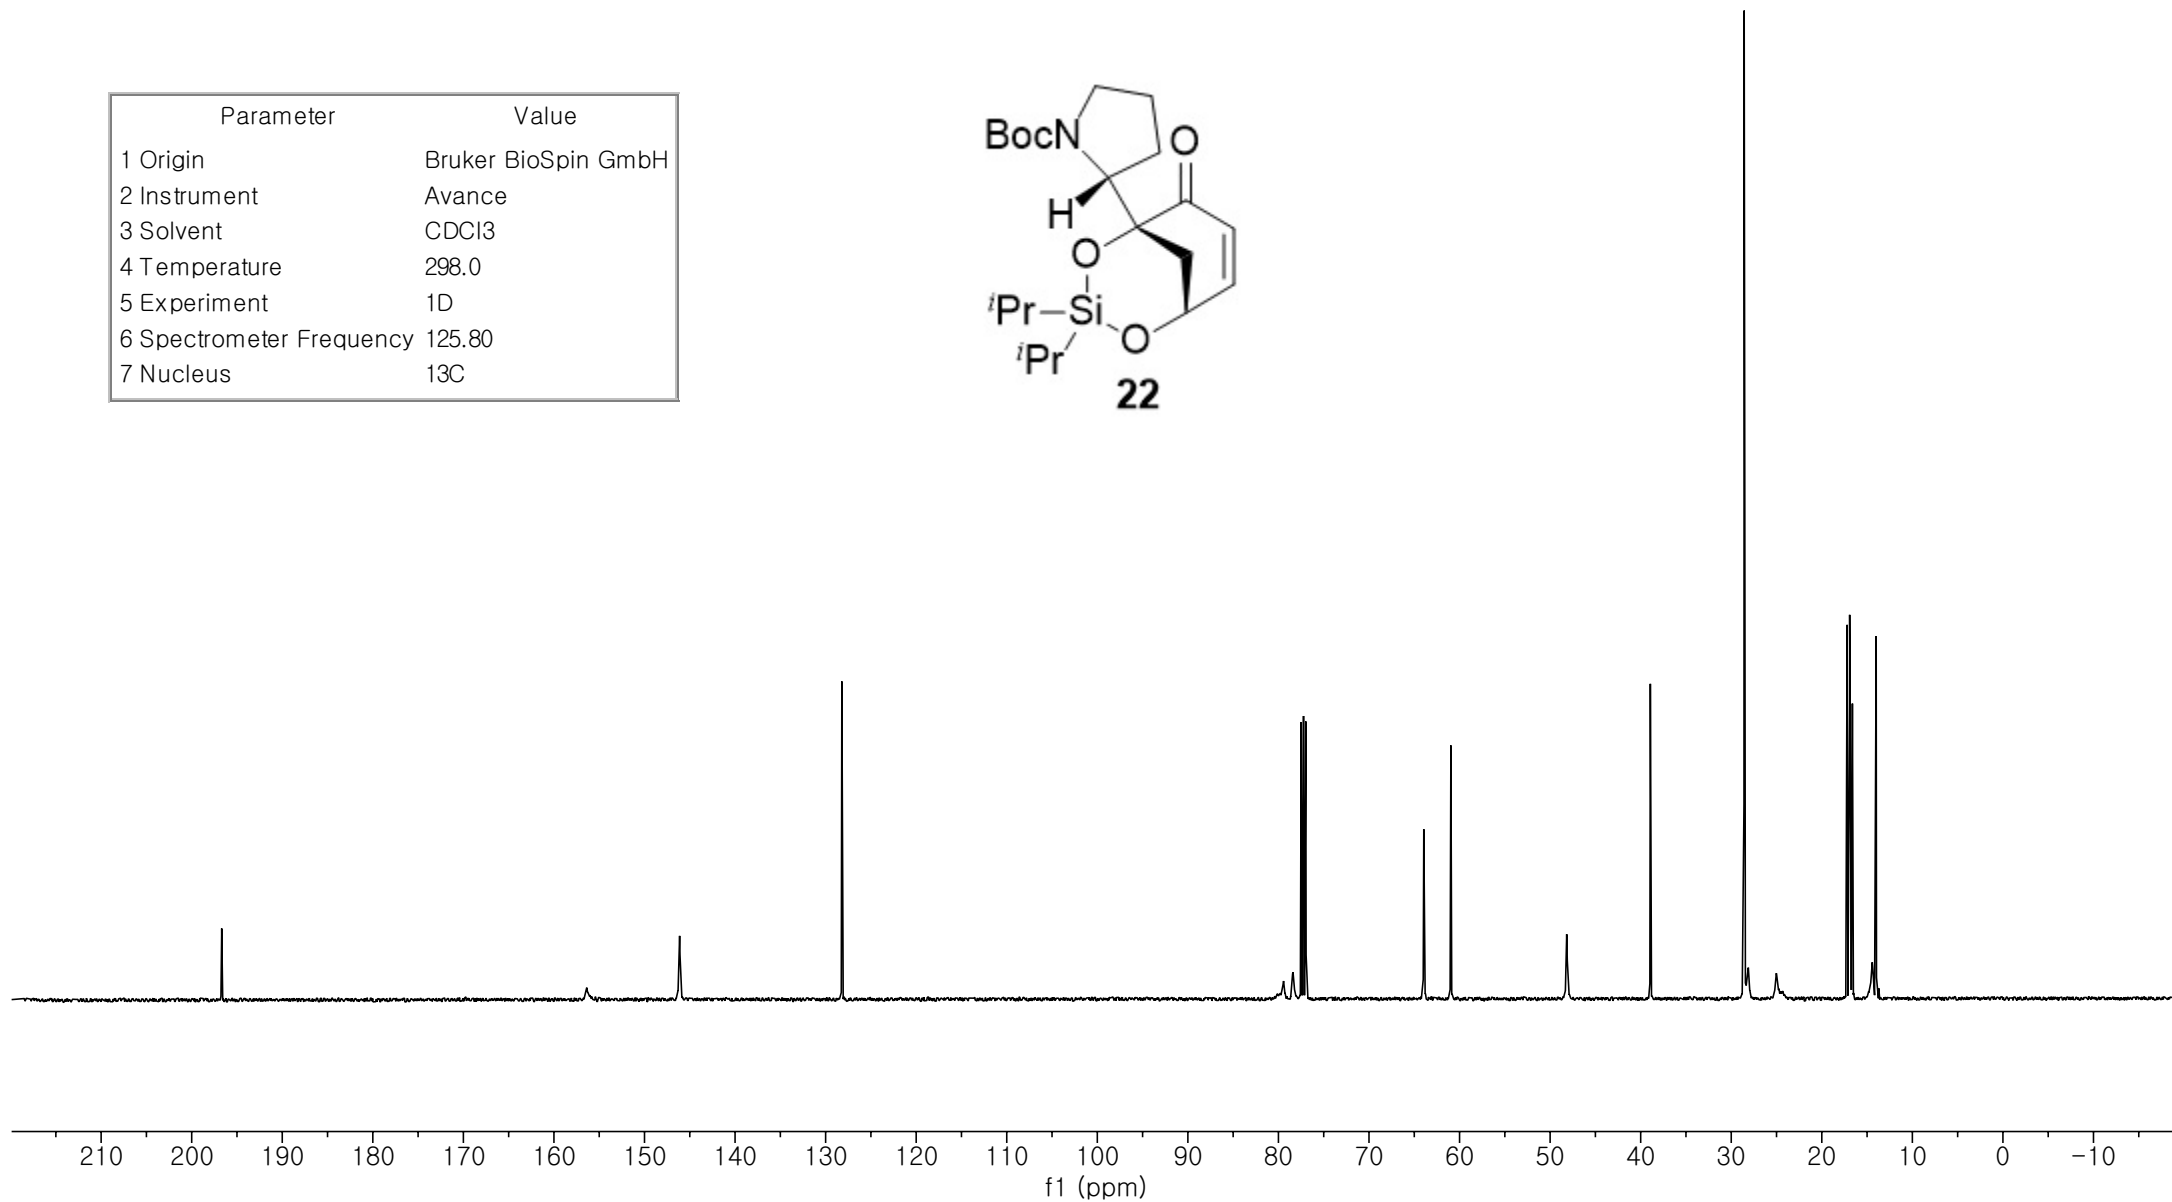

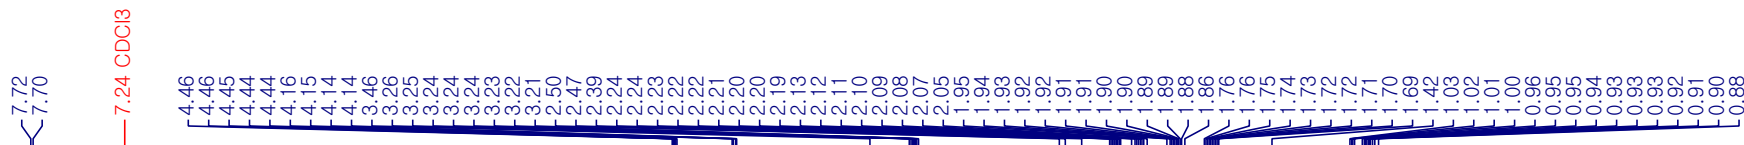

| Parameter                | Value               |
|--------------------------|---------------------|
| 1 Origin                 | Bruker BioSpin GmbH |
| 2 Instrument             | Avance              |
| 3 Solvent                | CDCl3               |
| 4 Temperature            | 298.0               |
| 5 Experiment             | 1D                  |
| 6 Spectrometer Frequency | 500.23              |
| 7 Nucleus                | 1H                  |

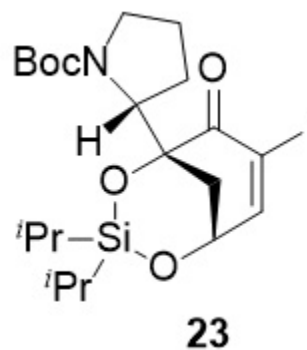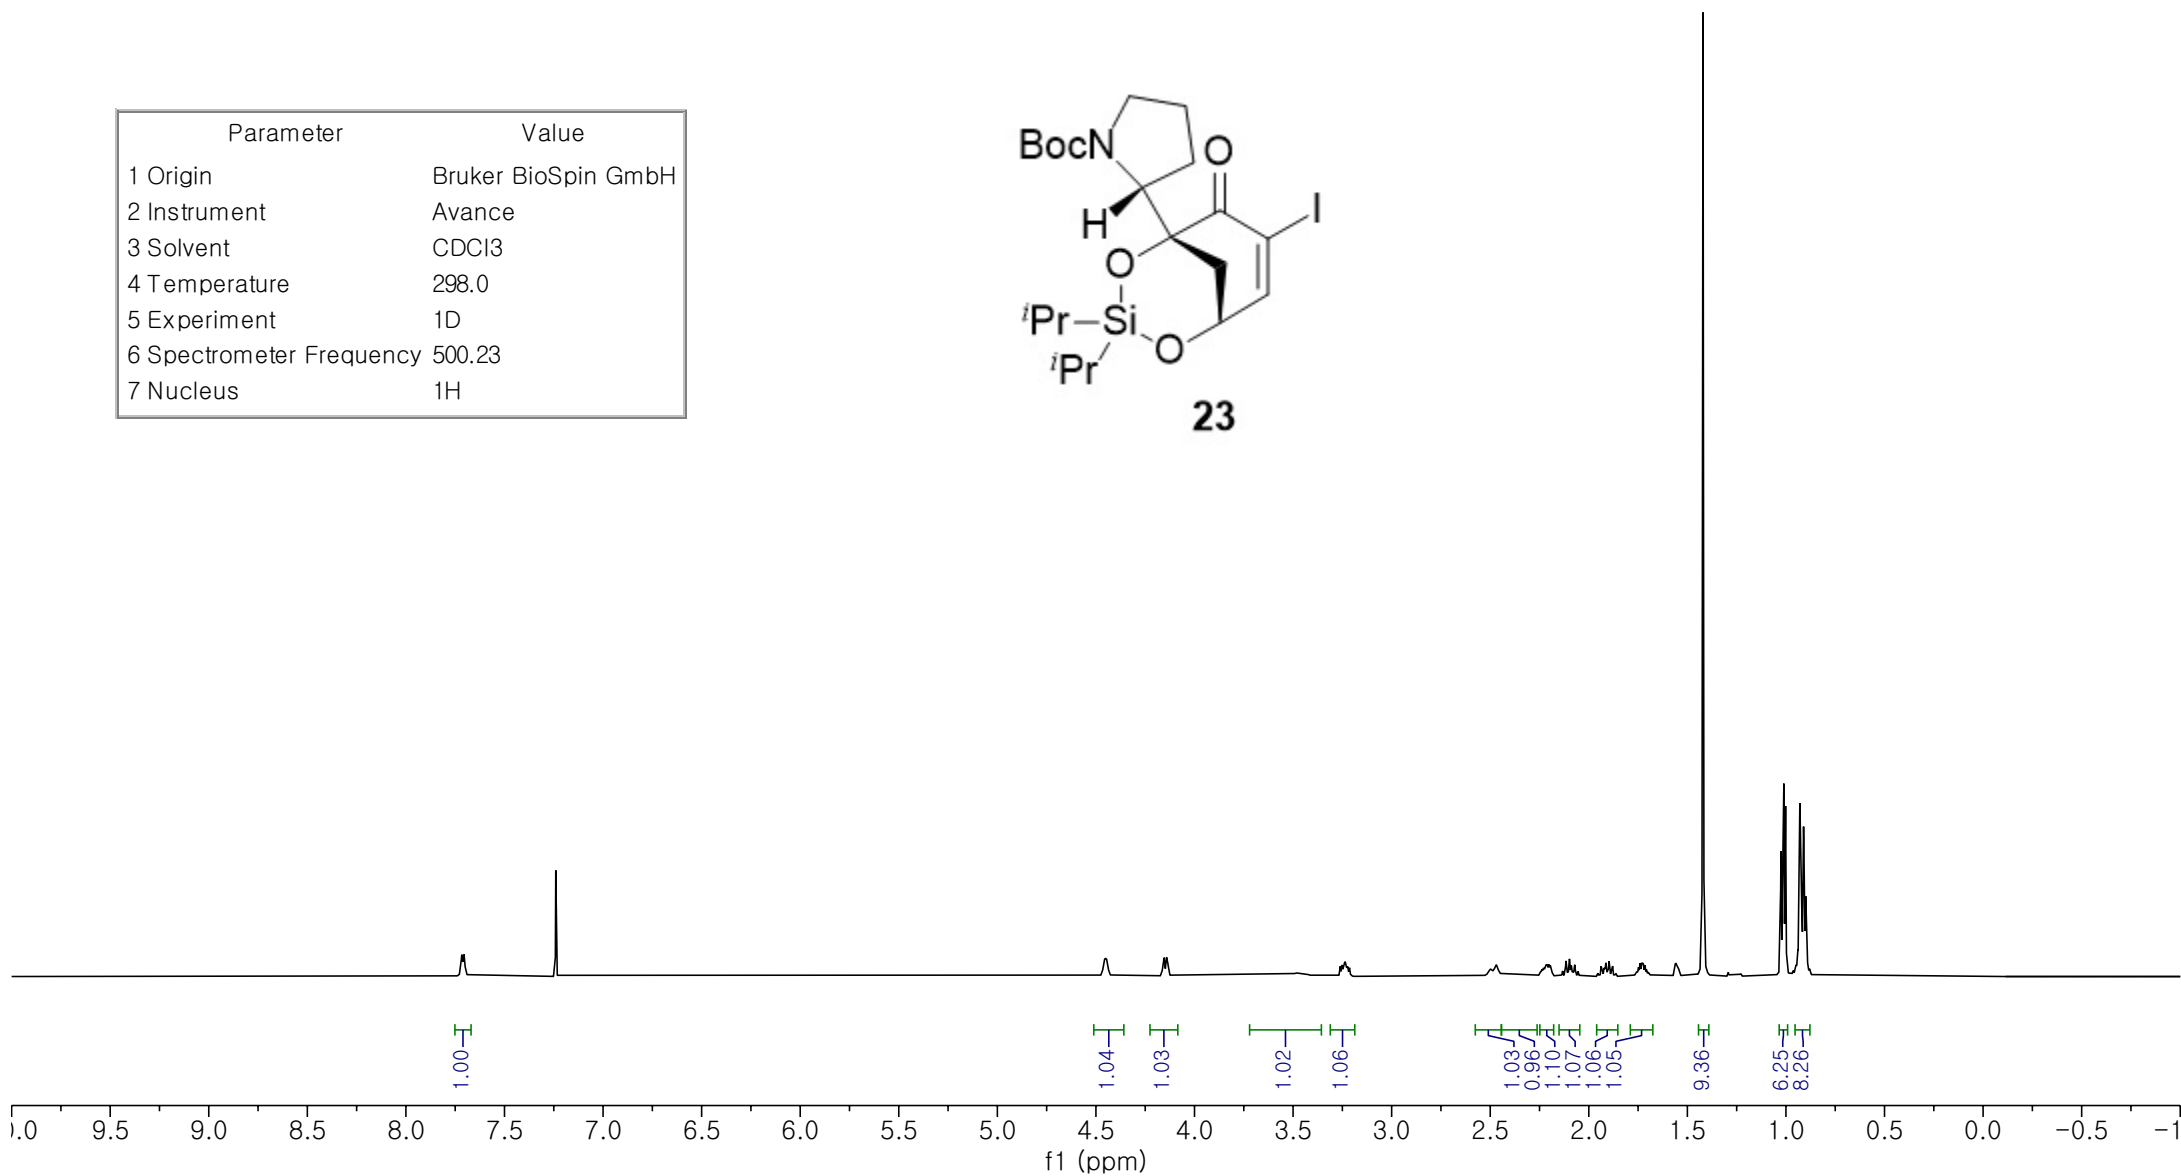

— 190.4

— 156.5  
 — 155.0

— 106.3

79.7  
 78.9  
 77.5 CDCI3  
 77.2 CDCI3  
 77.0 CDCI3

— 66.8

— 61.7

— 48.3

— 39.1

28.6  
 28.2  
 25.0

17.2  
 17.0  
 16.8  
 16.6  
 14.4  
 14.0

| Parameter                | Value               |
|--------------------------|---------------------|
| 1 Origin                 | Bruker BioSpin GmbH |
| 2 Instrument             | Avance              |
| 3 Solvent                | CDCl3               |
| 4 Temperature            | 298.5               |
| 5 Experiment             | 1D                  |
| 6 Spectrometer Frequency | 125.80              |
| 7 Nucleus                | 13C                 |

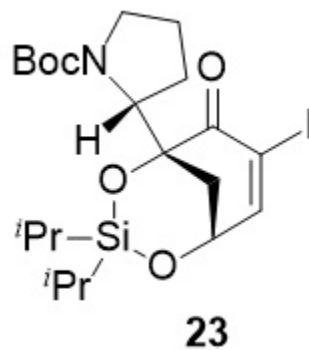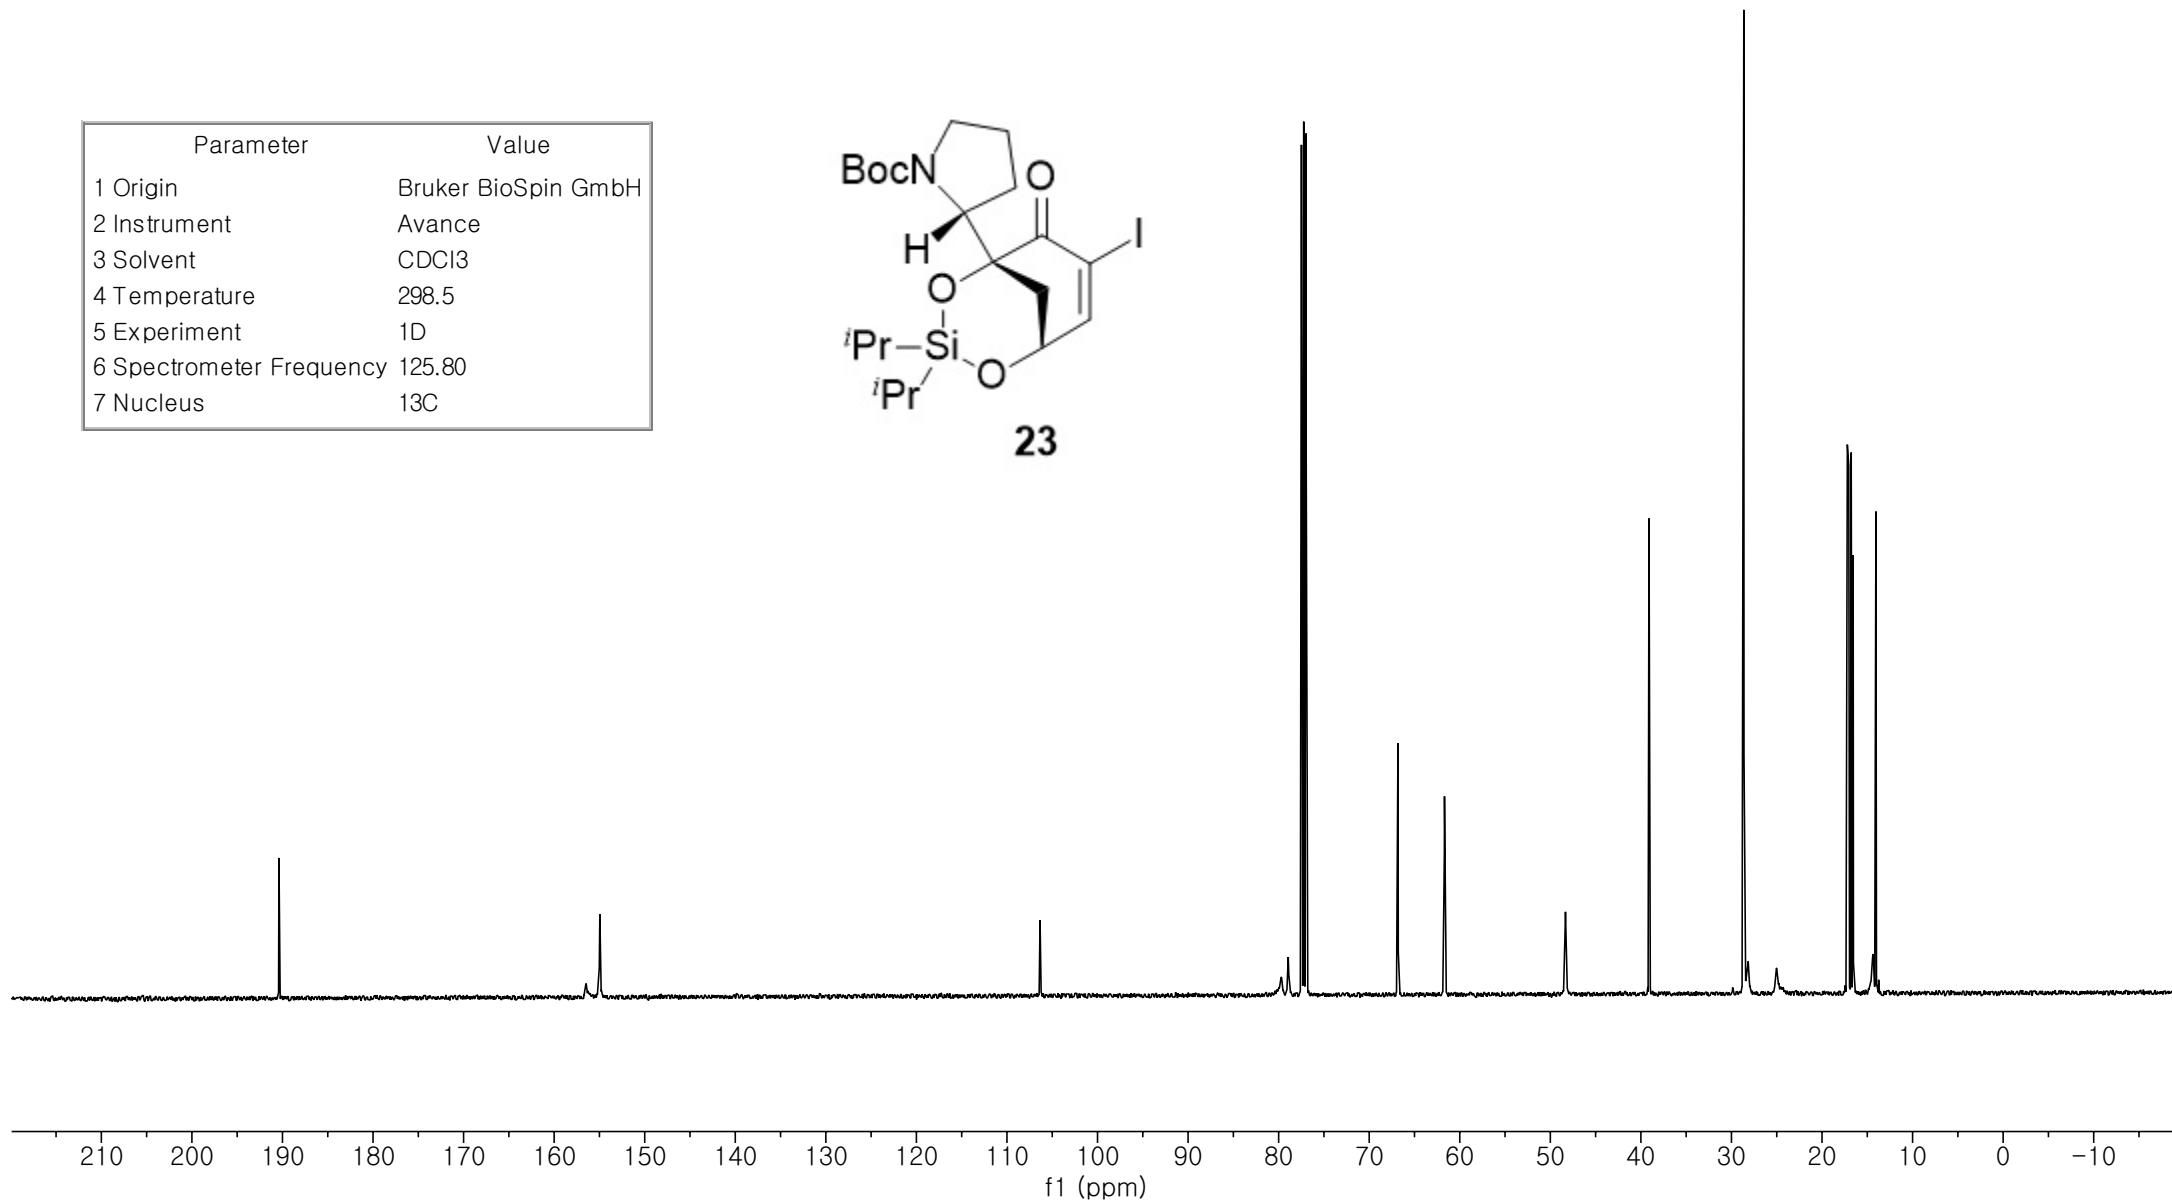



— 7.24 CDCl<sub>3</sub>

6.80  
6.78

6.02  
6.02  
6.00  
5.38  
5.37  
5.36  
5.36  
5.35  
5.34

4.08  
4.07  
4.06  
3.77  
3.60  
3.59  
3.58  
3.57  
3.56  
3.55

3.32  
3.30  
3.30  
3.29  
3.28  
3.28  
3.27  
2.70  
2.69  
2.68  
2.68  
2.67  
2.66  
2.65  
1.96  
1.94  
1.94  
1.93  
1.92  
1.92  
1.90  
1.78  
1.76  
1.75  
1.73  
1.69  
1.68  
1.67  
1.66  
1.65  
1.64  
1.62  
1.61  
1.60  
1.59  
1.43  
1.43  
1.08  
1.14

| Parameter                | Value               |
|--------------------------|---------------------|
| 1 Origin                 | Bruker BioSpin GmbH |
| 2 Instrument             | Avance              |
| 3 Solvent                | CDCl <sub>3</sub>   |
| 4 Temperature            | 298.0               |
| 5 Experiment             | 1D                  |
| 6 Spectrometer Frequency | 500.23              |
| 7 Nucleus                | <sup>1</sup> H      |

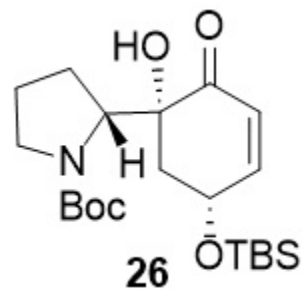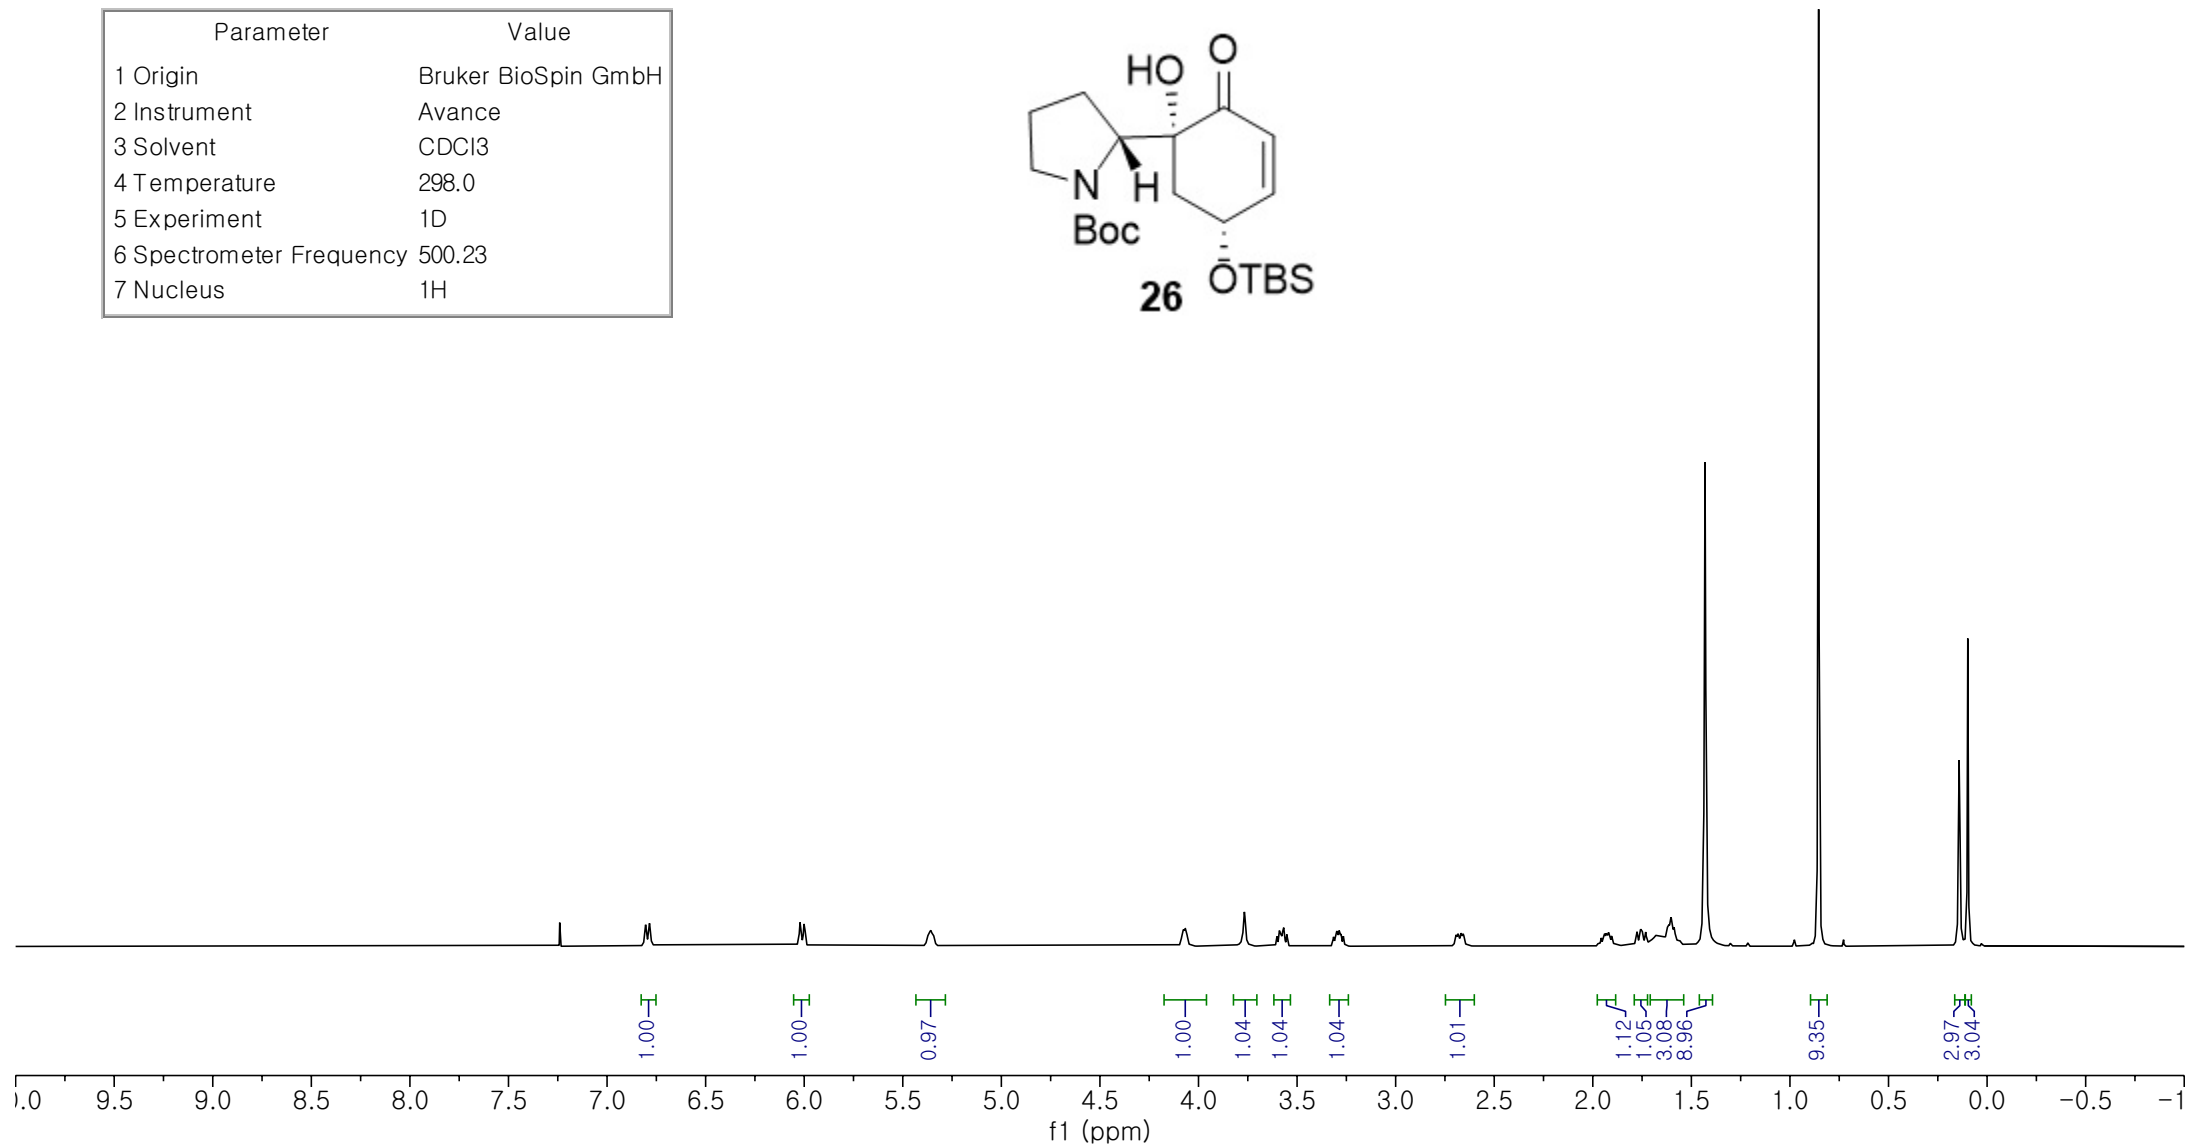

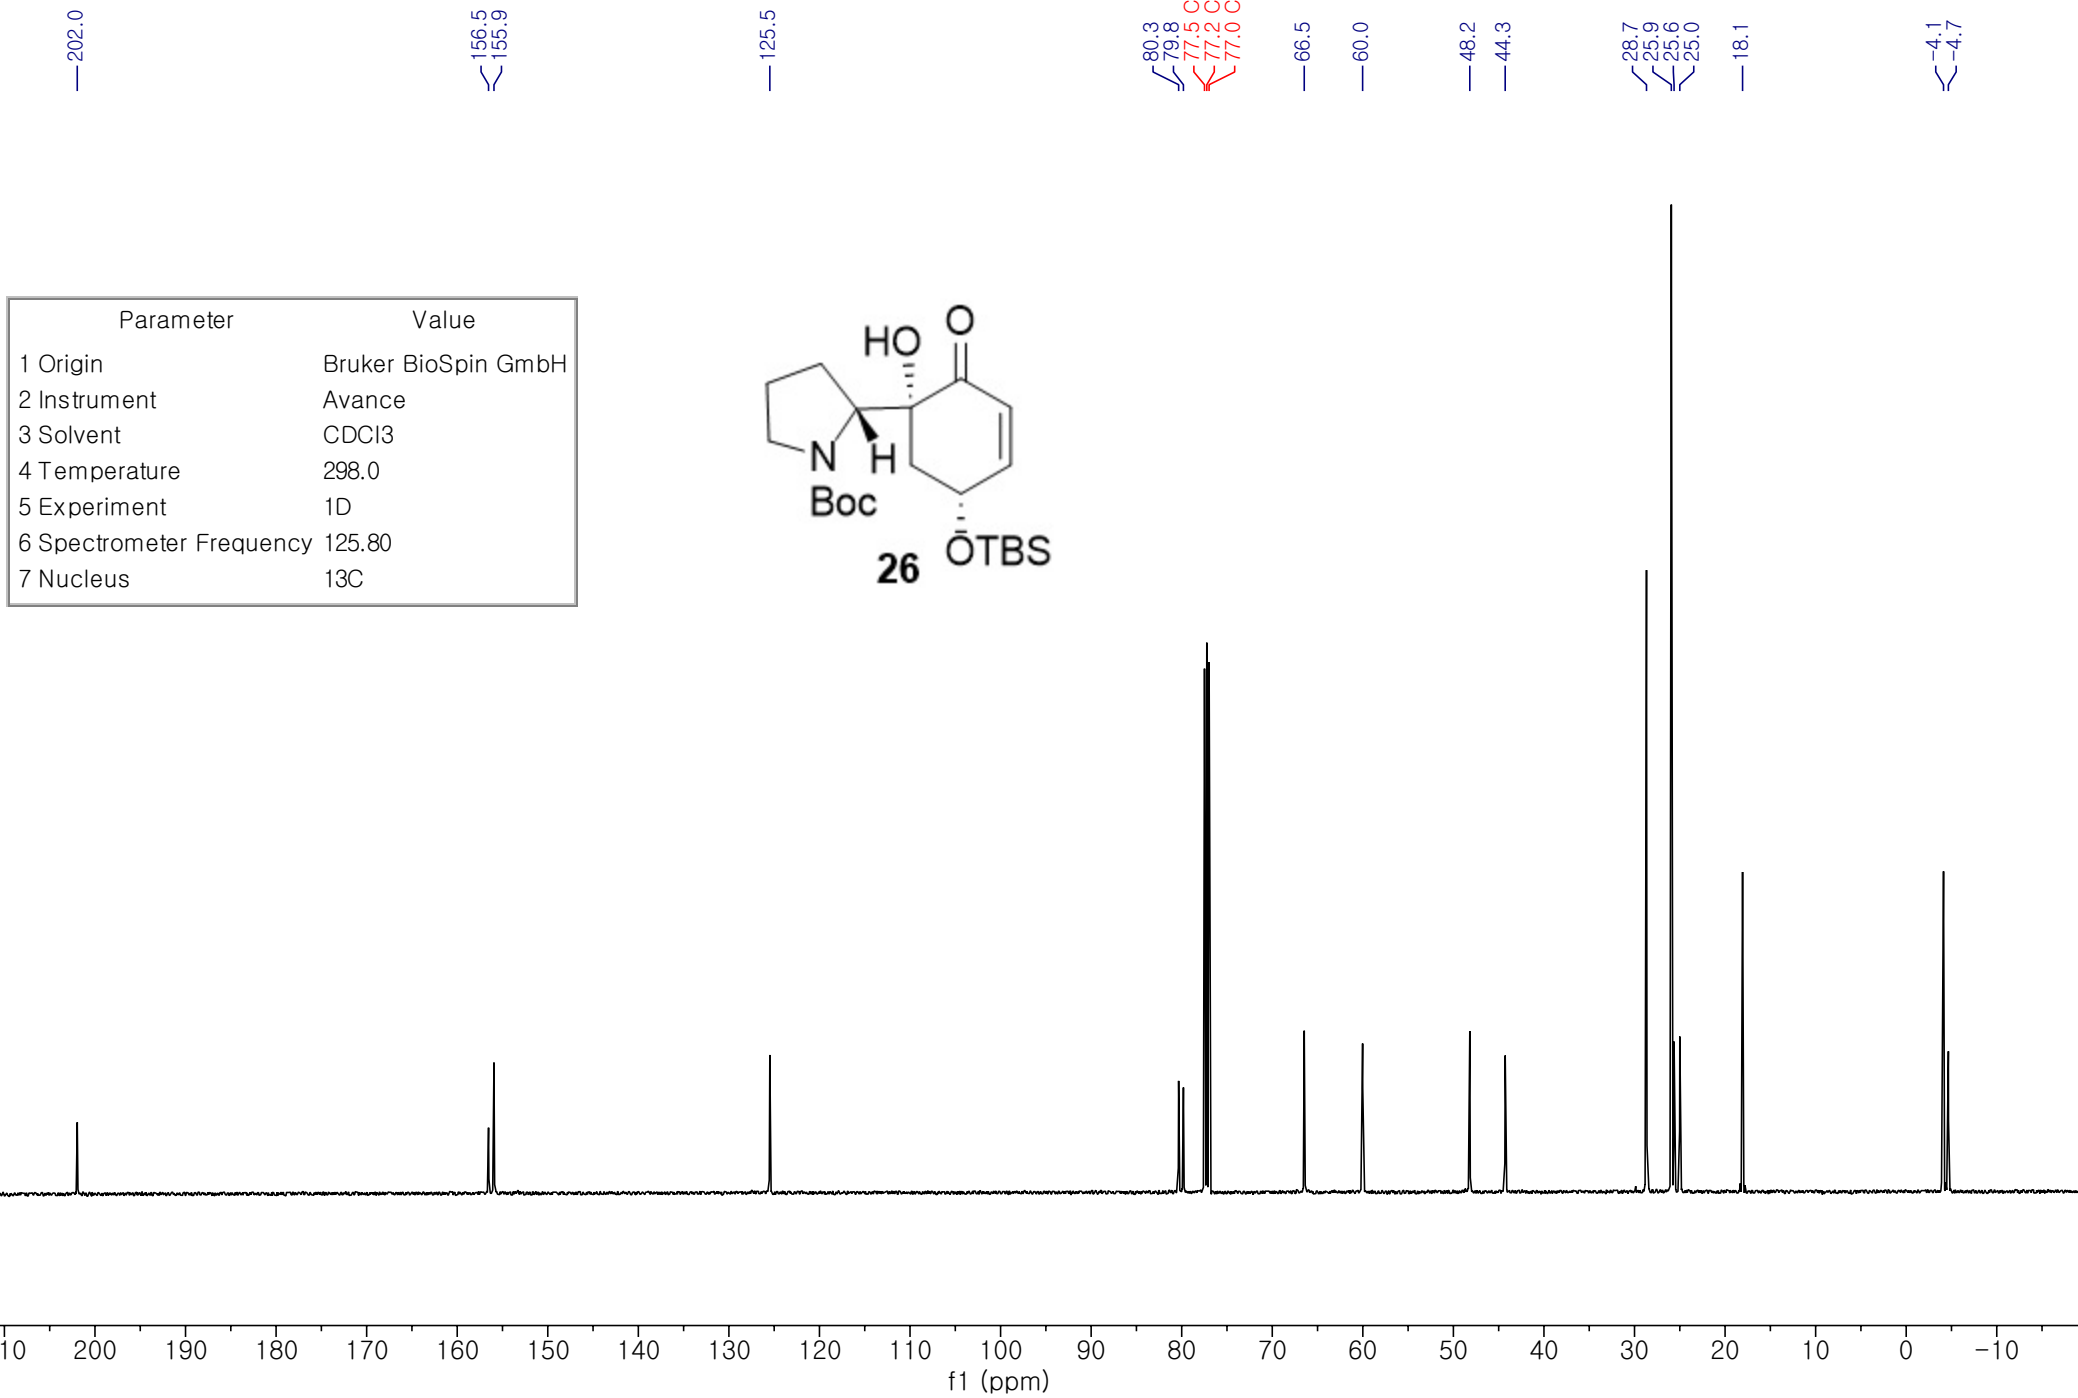

| Parameter                | Value               |
|--------------------------|---------------------|
| 1 Origin                 | Bruker BioSpin GmbH |
| 2 Instrument             | Avance              |
| 3 Solvent                | CDCl3               |
| 4 Temperature            | 298.0               |
| 5 Experiment             | 1D                  |
| 6 Spectrometer Frequency | 125.80              |
| 7 Nucleus                | 13C                 |

7.24 CDCI3  
 6.32  
 6.30  
 6.30  
 6.25  
 6.24  
 6.23  
 6.22  
 5.34  
 5.34  
 5.33  
 5.32  
 4.15  
 4.12  
 4.11  
 4.11  
 3.61  
 3.59  
 3.59  
 3.58  
 3.57  
 3.57  
 3.55  
 3.38  
 3.37  
 3.36  
 3.36  
 3.35  
 3.35  
 3.34  
 3.33  
 2.81  
 2.79  
 2.78  
 2.77  
 1.90  
 1.89  
 1.88  
 1.87  
 1.87  
 1.86  
 1.86  
 1.84  
 1.84  
 1.84  
 1.83  
 1.83  
 1.82  
 1.81  
 1.76  
 1.75  
 1.75  
 1.74  
 1.73  
 1.72  
 1.72  
 1.71  
 1.70  
 1.69  
 1.69  
 1.68  
 1.68  
 1.61  
 1.60  
 1.59  
 1.59  
 1.57  
 1.55  
 1.46  
 1.38  
 1.33  
 1.32  
 1.31  
 1.31  
 1.29  
 1.28  
 1.28  
 0.86  
 0.15  
 0.10

| Parameter                | Value               |
|--------------------------|---------------------|
| 1 Origin                 | Bruker BioSpin GmbH |
| 2 Instrument             | Avance              |
| 3 Solvent                | CDCI3               |
| 4 Temperature            | 298.0               |
| 5 Experiment             | 1D                  |
| 6 Spectrometer Frequency | 500.23              |
| 7 Nucleus                | 1H                  |

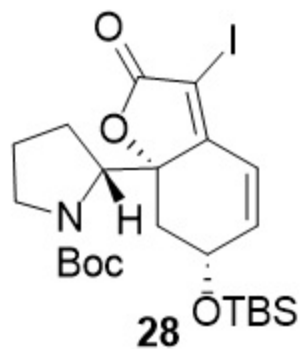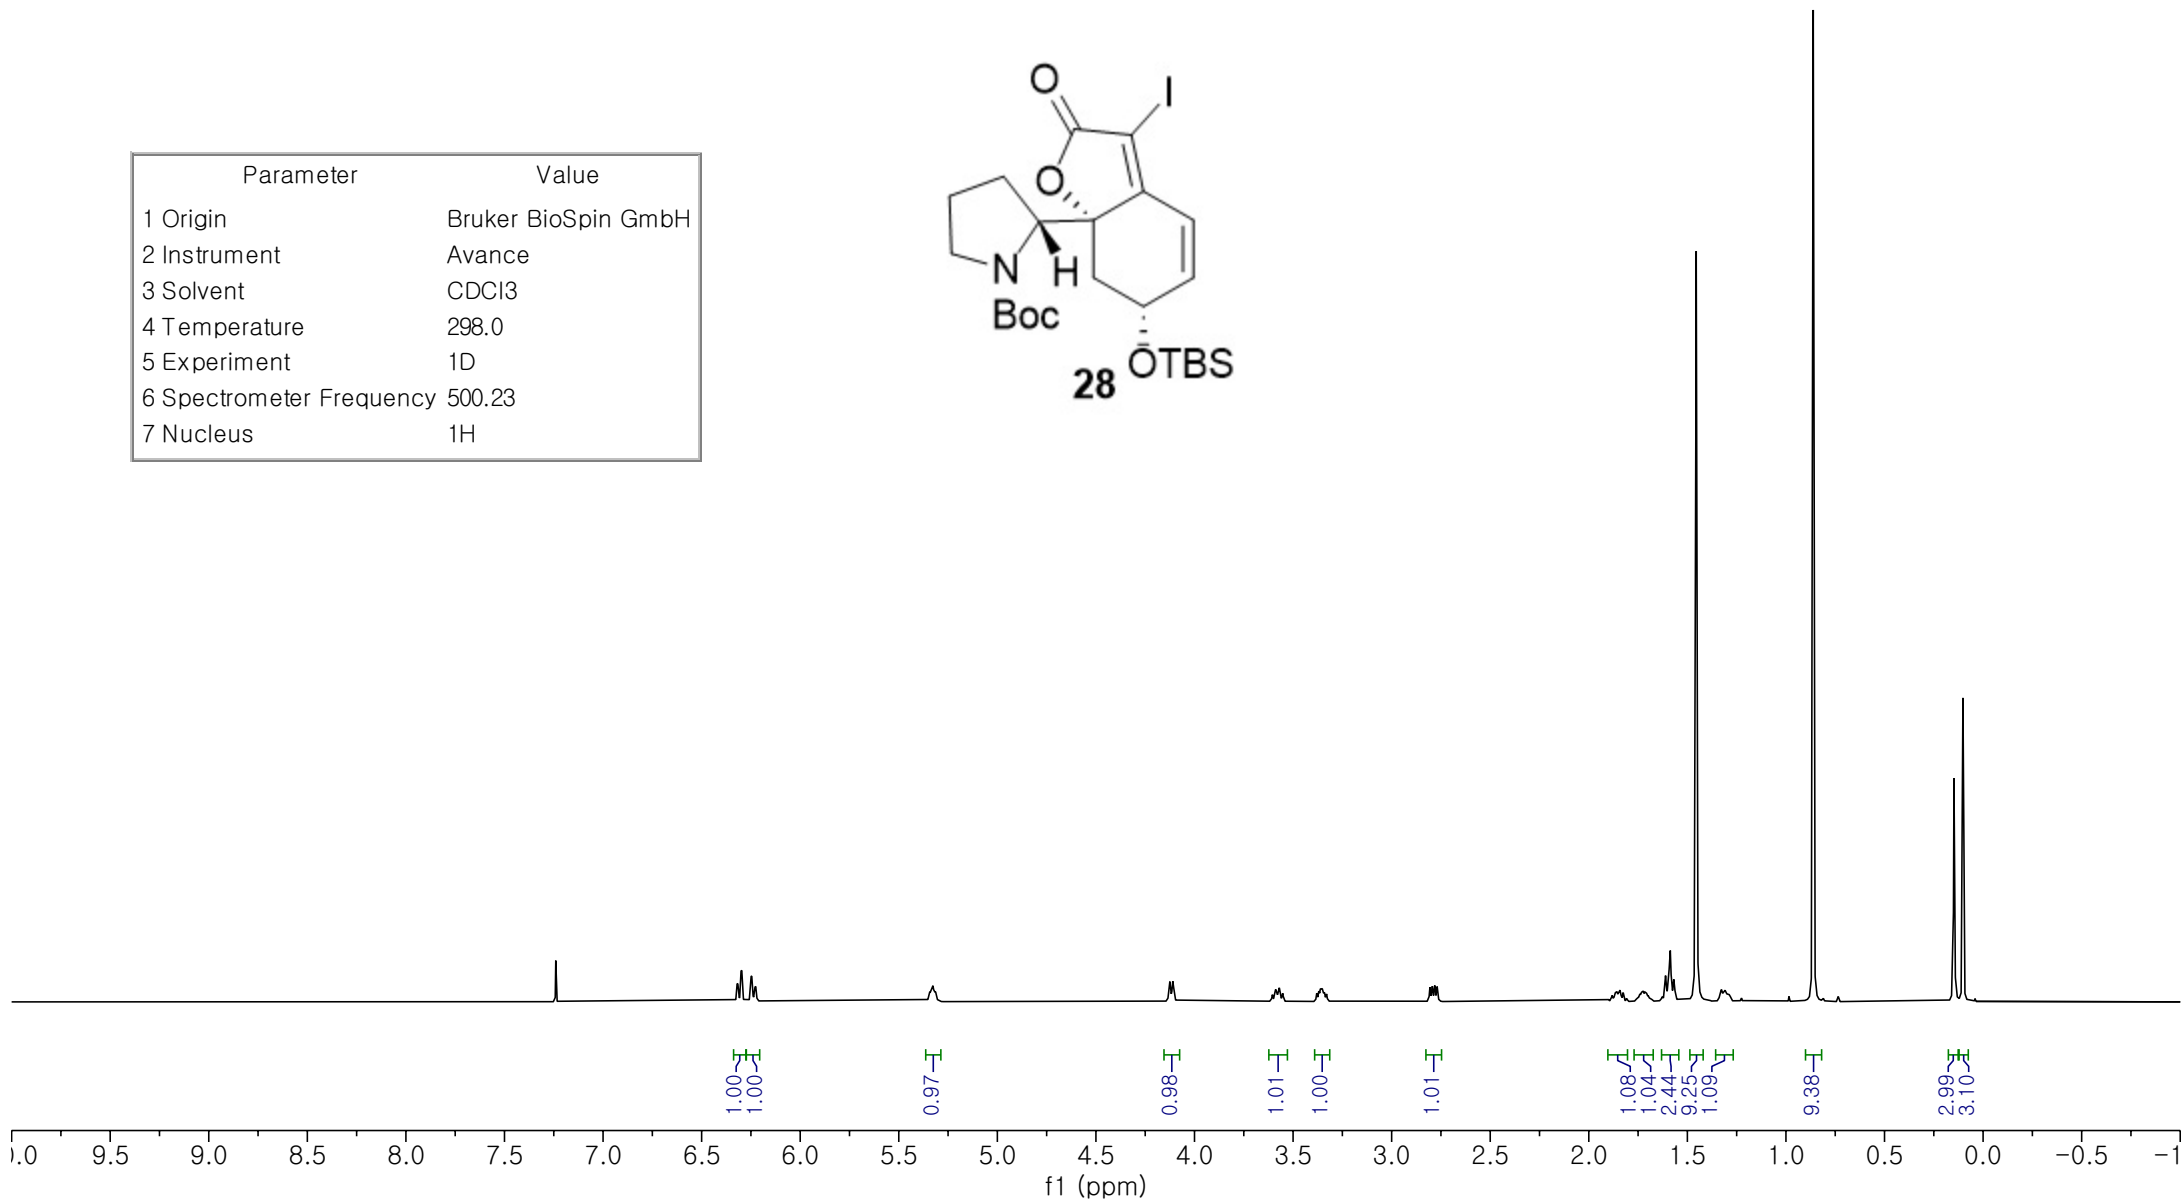

| Parameter                | Value               |
|--------------------------|---------------------|
| 1 Origin                 | Bruker BioSpin GmbH |
| 2 Instrument             | Avance              |
| 3 Solvent                | CDCl <sub>3</sub>   |
| 4 Temperature            | 298.0               |
| 5 Experiment             | 1D                  |
| 6 Spectrometer Frequency | 125.80              |
| 7 Nucleus                | 13C                 |

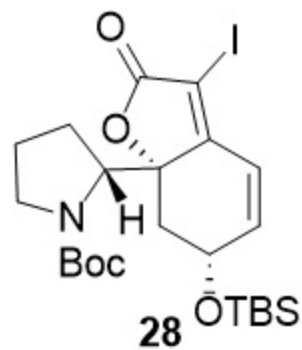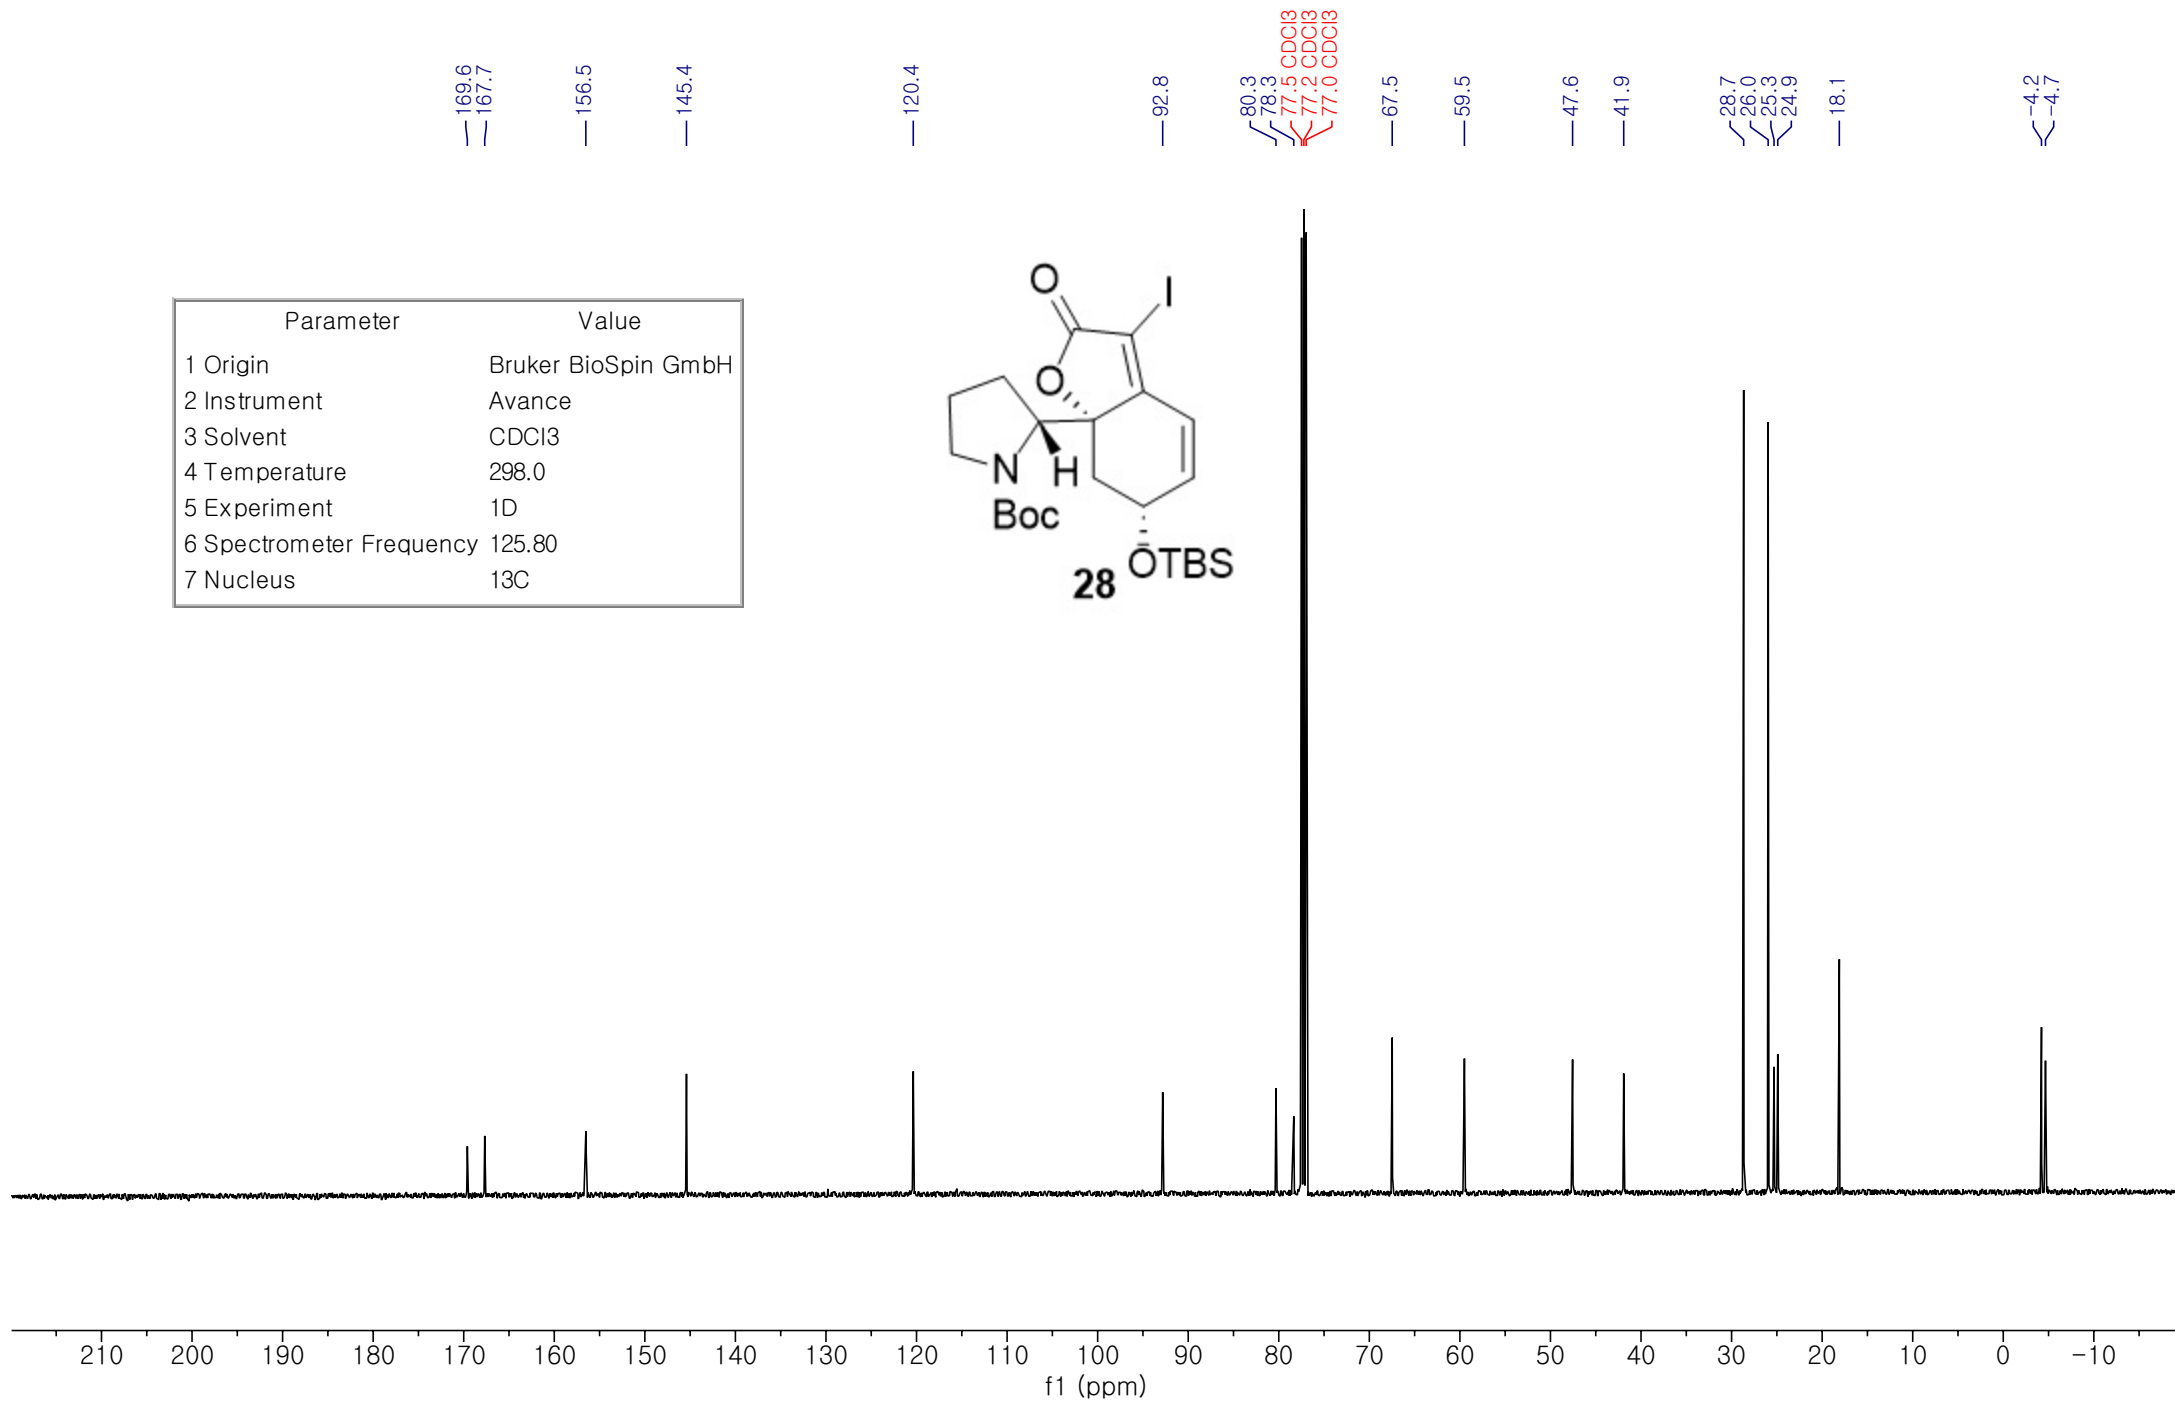

| Parameter                | Value               |
|--------------------------|---------------------|
| 1 Origin                 | Bruker BioSpin GmbH |
| 2 Instrument             | Avance              |
| 3 Solvent                | CDCl <sub>3</sub>   |
| 4 Temperature            | 298.0               |
| 5 Experiment             | 1D                  |
| 6 Spectrometer Frequency | 500.23              |
| 7 Nucleus                | <sup>1</sup> H      |

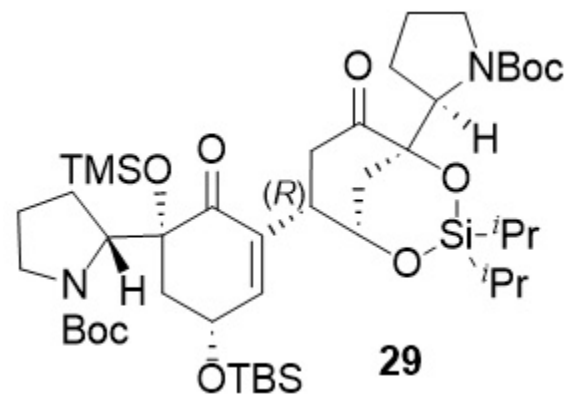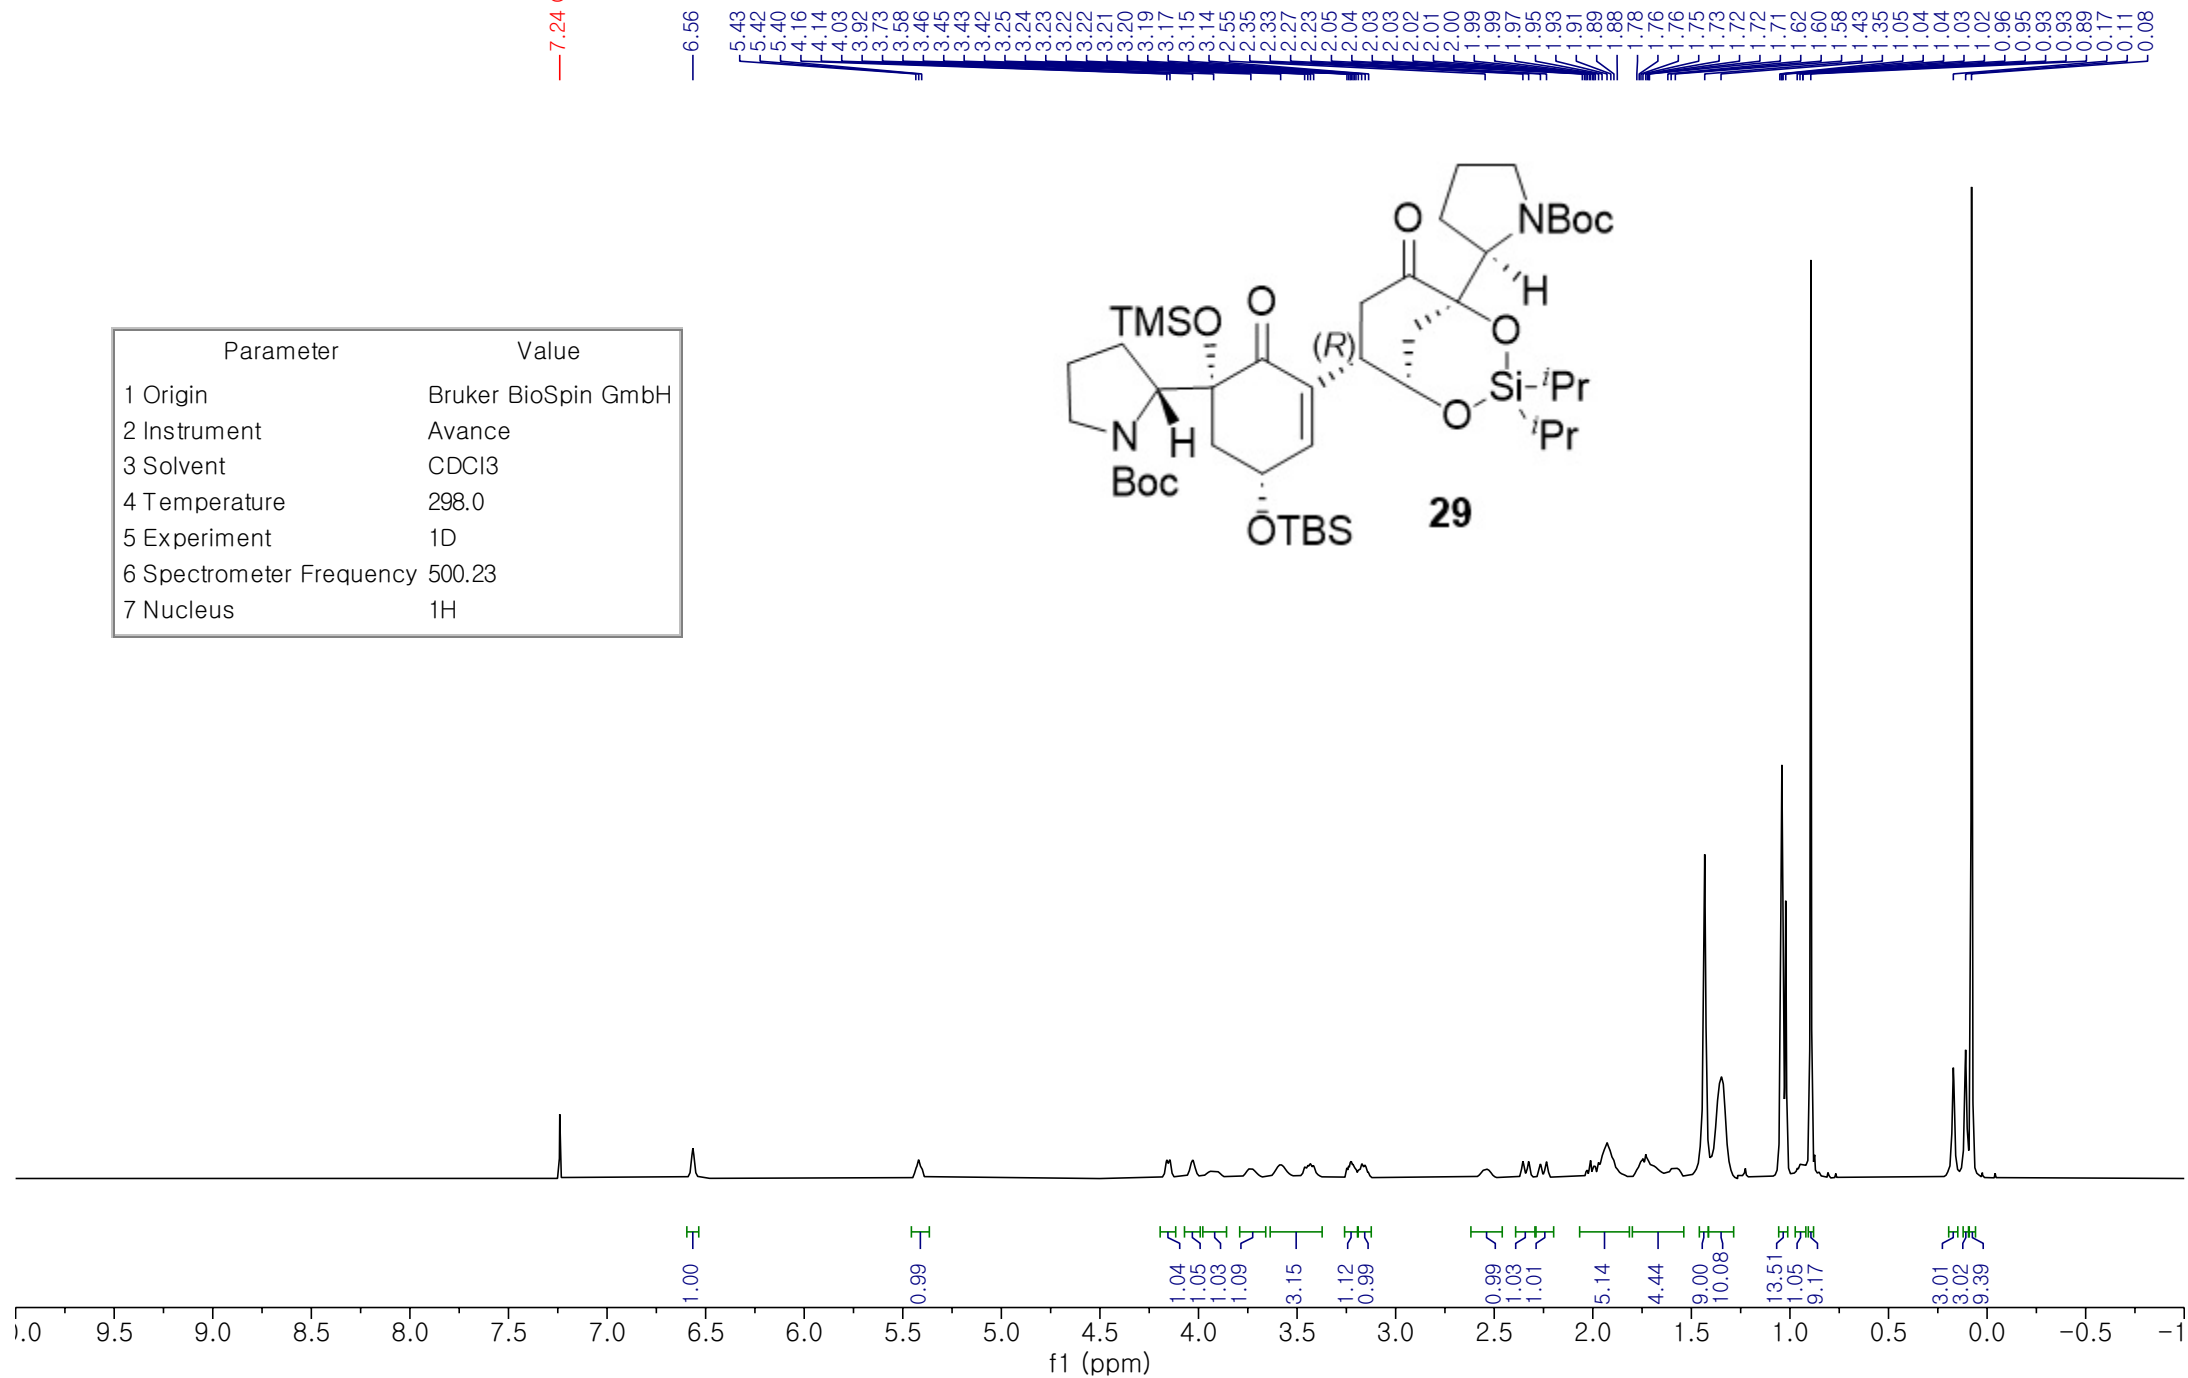

— 210.6

— 200.0

— 156.2  
 — 155.8

— 149.6

— 137.2

84.8  
 82.5  
 81.8  
 79.8  
 79.4  
 77.5 CDCl<sub>3</sub>  
 77.2 CDCl<sub>3</sub>  
 77.0 CDCl<sub>3</sub>  
 69.5  
 66.4  
 61.0  
 60.0

48.4  
 48.0  
 45.5  
 44.3

36.9  
 36.1

28.6  
 26.1  
 25.6  
 24.9

24.2  
 18.1  
 17.4  
 17.3  
 17.3  
 15.9  
 15.6  
 14.2

2.5  
 -4.2  
 -4.5

| Parameter                | Value               |
|--------------------------|---------------------|
| 1 Origin                 | Bruker BioSpin GmbH |
| 2 Instrument             | Avance              |
| 3 Solvent                | CDCl <sub>3</sub>   |
| 4 Temperature            | 298.3               |
| 5 Experiment             | 1D                  |
| 6 Spectrometer Frequency | 125.80              |
| 7 Nucleus                | 13C                 |

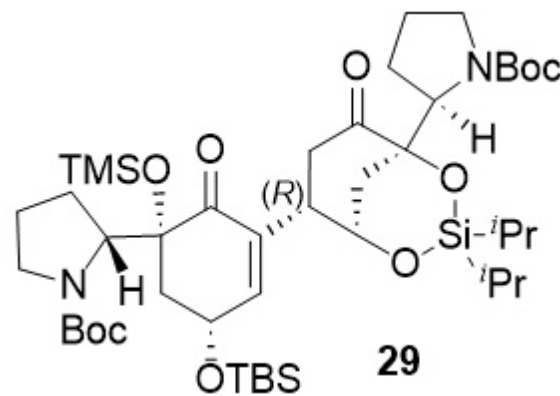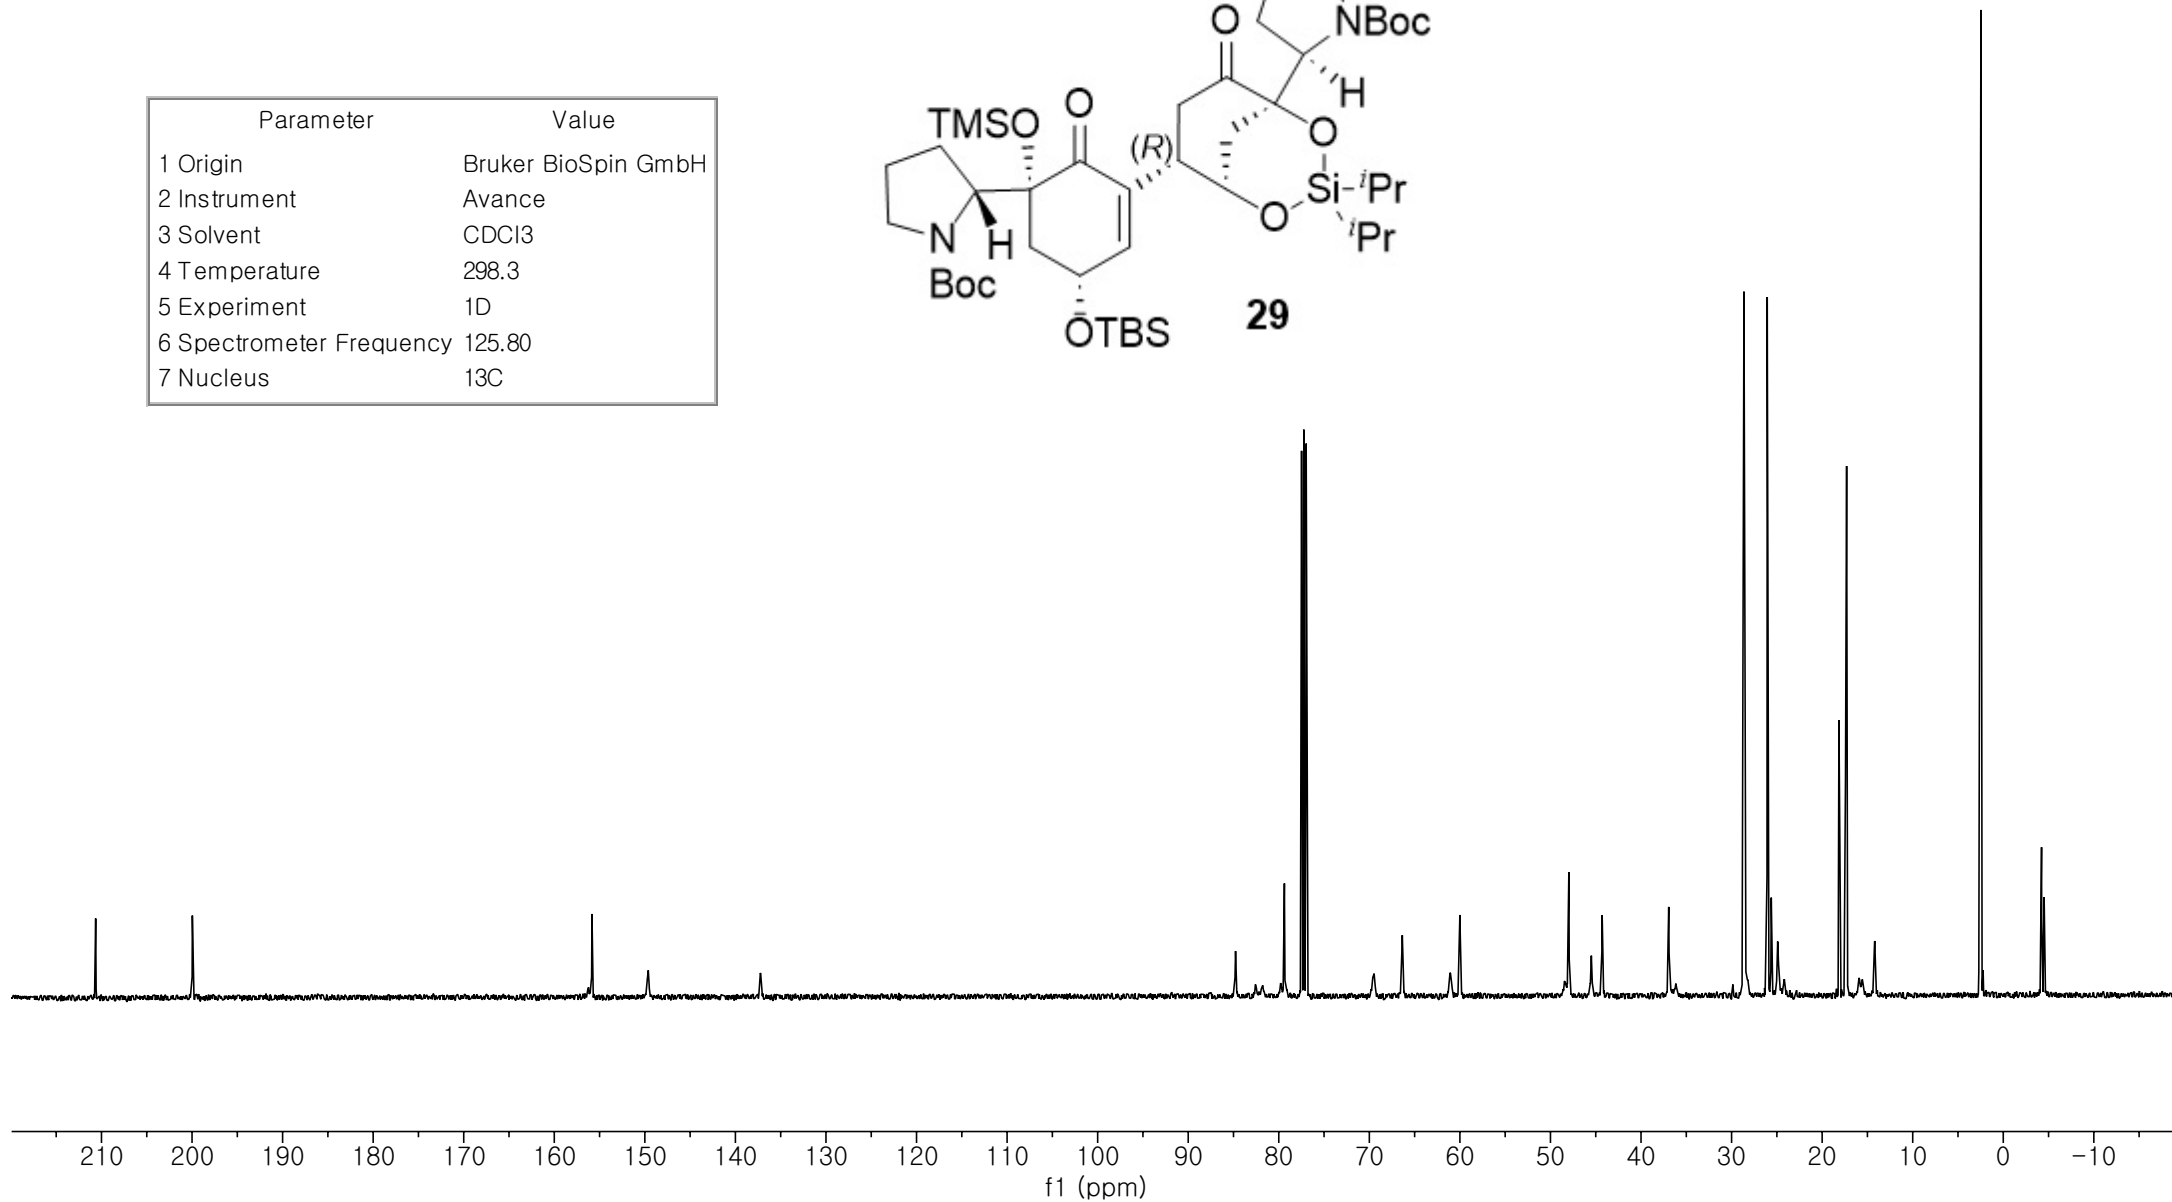

$^{13}\text{C}$  NMR (126 MHz) spectrum of **29** in  $\text{CDCl}_3$  at 298 K

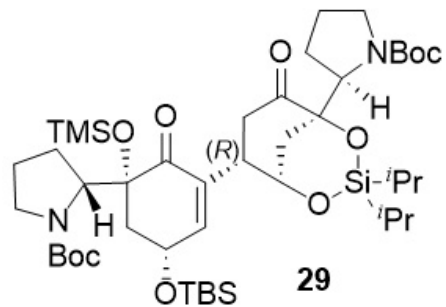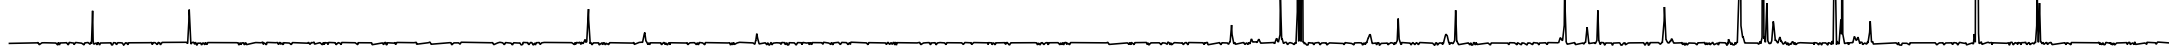

$^{13}\text{C}$  NMR (126 MHz) spectrum of **29** in  $\text{CDCl}_3$  at 273 K

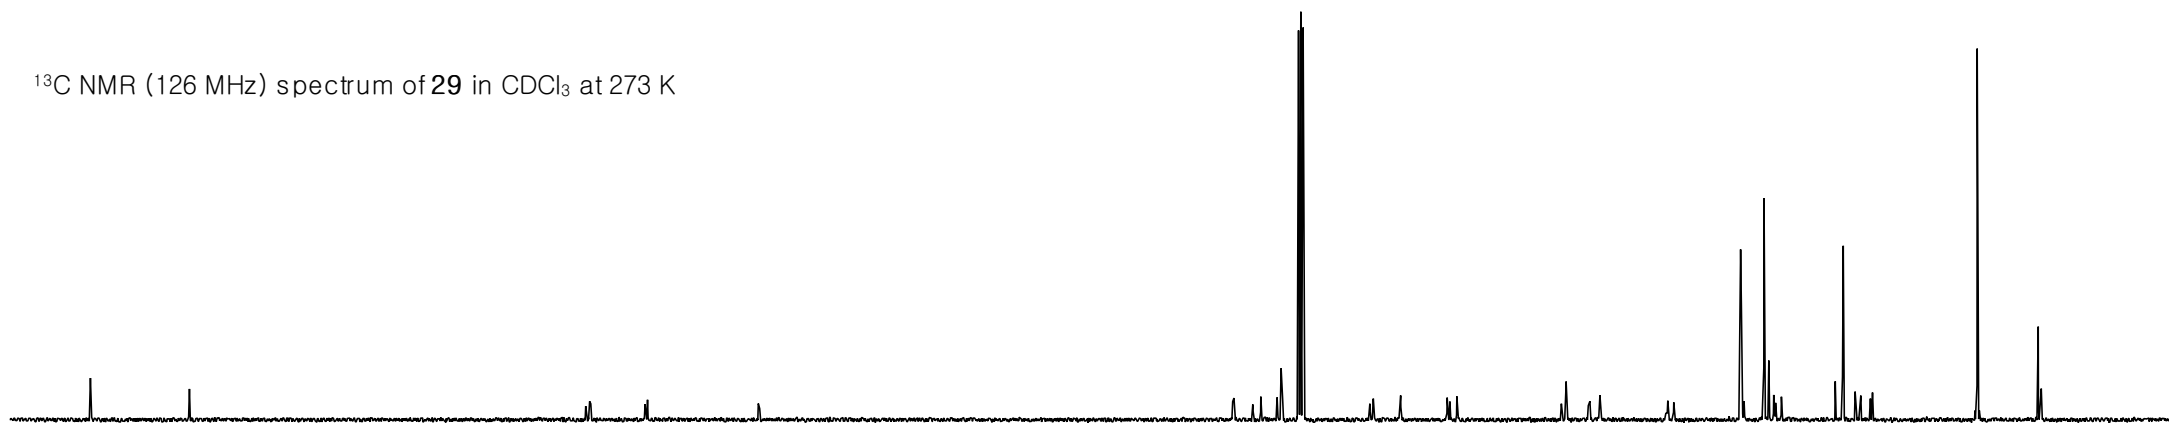

$^{13}\text{C}$  NMR (126 MHz) spectrum of **29** in  $\text{CDCl}_3$  at 253 K

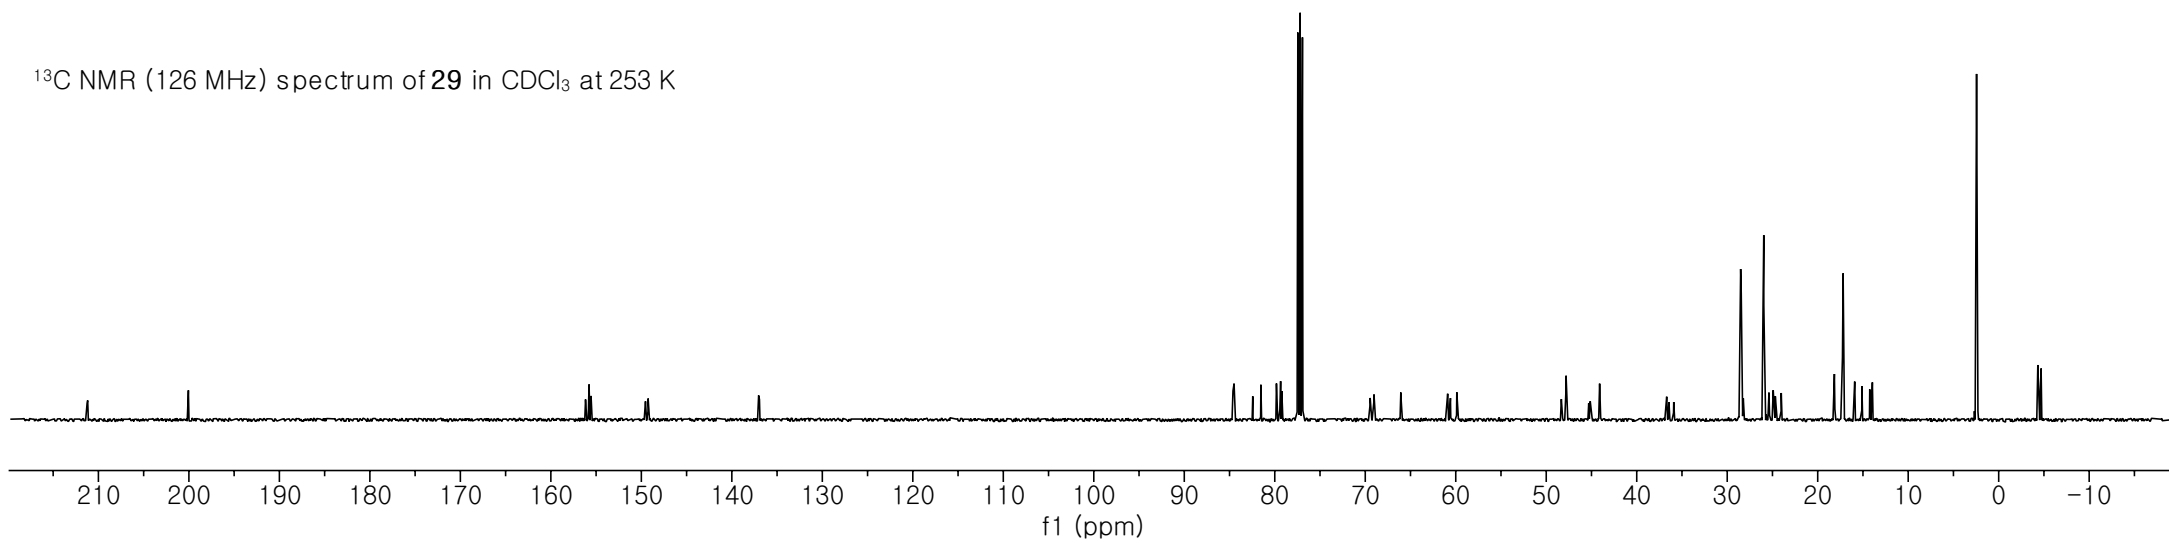

— 7.24 CDCl<sub>3</sub>

— 6.50

— 6.11

— 5.88

— 4.42

3.97

3.95

3.90

3.53

3.41

3.34

3.33

3.32

3.31

3.30

3.29

2.73

2.69

2.65

2.64

2.62

2.00

2.00

1.98

1.93

1.85

1.84

1.83

1.81

1.79

1.77

1.75

1.74

1.73

1.72

1.71

1.64

1.60

1.58

1.55

1.55

1.44

1.44

1.42

1.39

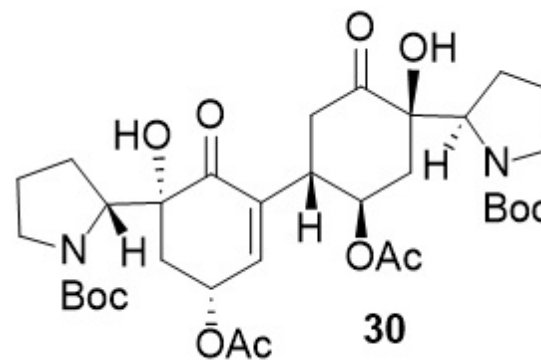

| Parameter                | Value                        |
|--------------------------|------------------------------|
| 1 Origin                 | Bruker BioSpin GmbH & Co. KG |
| 2 Instrument             | Avance                       |
| 3 Solvent                | CDCl <sub>3</sub>            |
| 4 Temperature            | 298.0                        |
| 5 Experiment             | 1D                           |
| 6 Spectrometer Frequency | 500.23                       |
| 7 Nucleus                | <sup>1</sup> H               |

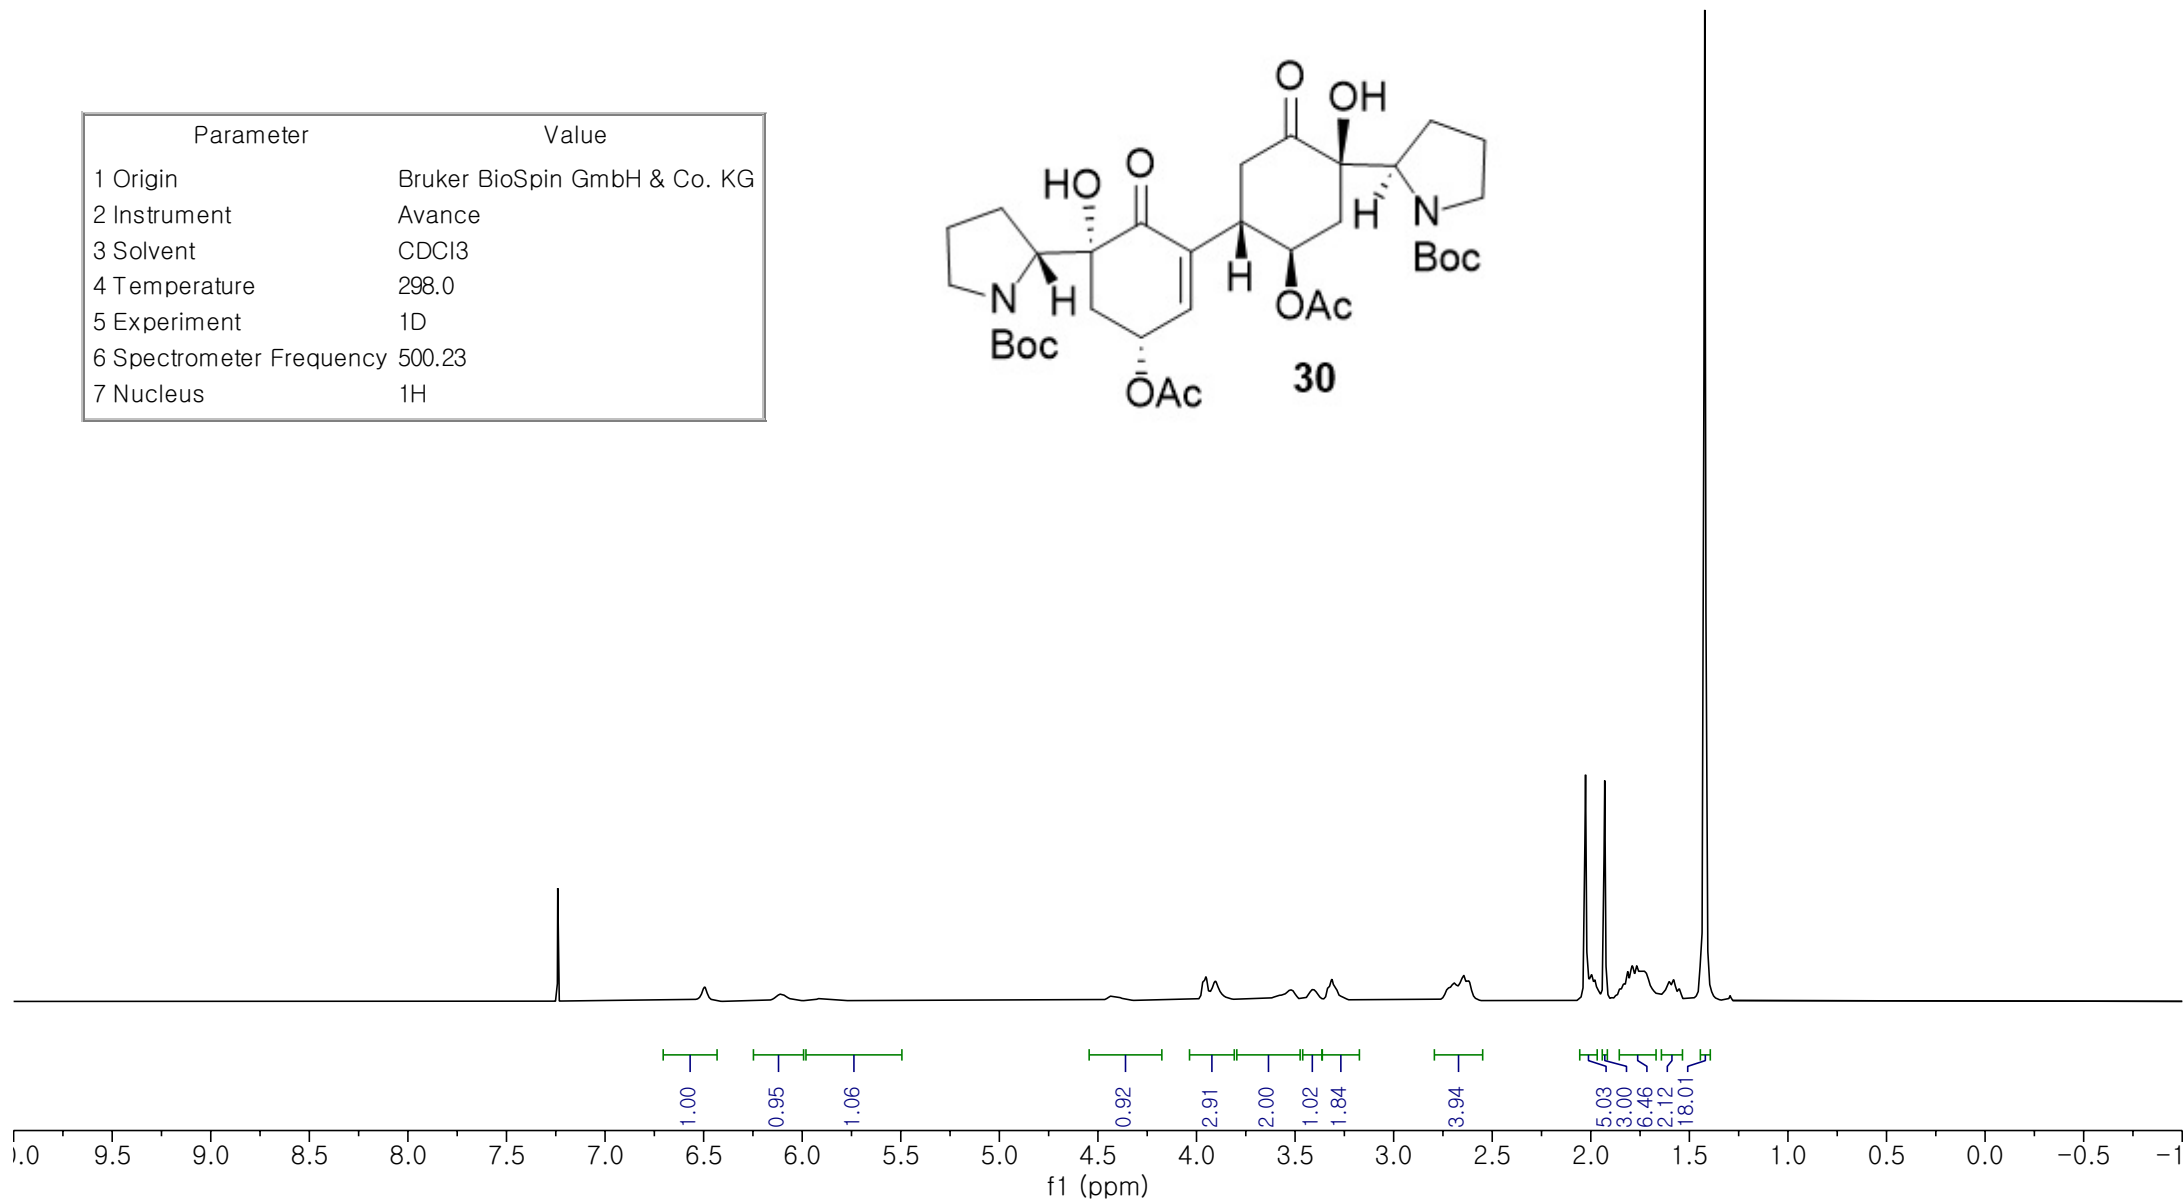



— 210.6

— 200.4

∨ 169.7  
 ∨ 169.5

∨ 156.2  
 ∨ 156.0

— 146.3

— 136.3

∨ 81.2  
 ∨ 79.9  
 ∨ 79.8  
 ∨ 79.4  
 ∨ 77.5 CDCI3  
 ∨ 77.2 CDCI3  
 ∨ 77.0 CDCI3  
 ∨ 70.0  
 ∨ 67.4

∨ 61.1  
 ∨ 60.7

∨ 48.1  
 ∨ 47.9

∨ 41.3  
 ∨ 39.0  
 ∨ 38.8

∨ 28.5  
 ∨ 28.4  
 ∨ 25.9  
 ∨ 24.7  
 ∨ 21.0  
 ∨ 20.9

| Parameter                | Value                        |
|--------------------------|------------------------------|
| 1 Origin                 | Bruker BioSpin GmbH & Co. KG |
| 2 Instrument             | Avance                       |
| 3 Solvent                | CDCl3                        |
| 4 Temperature            | 298.1                        |
| 5 Experiment             | 1D                           |
| 6 Spectrometer Frequency | 125.80                       |
| 7 Nucleus                | 13C                          |

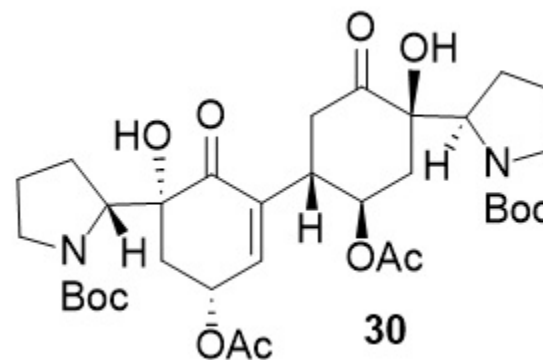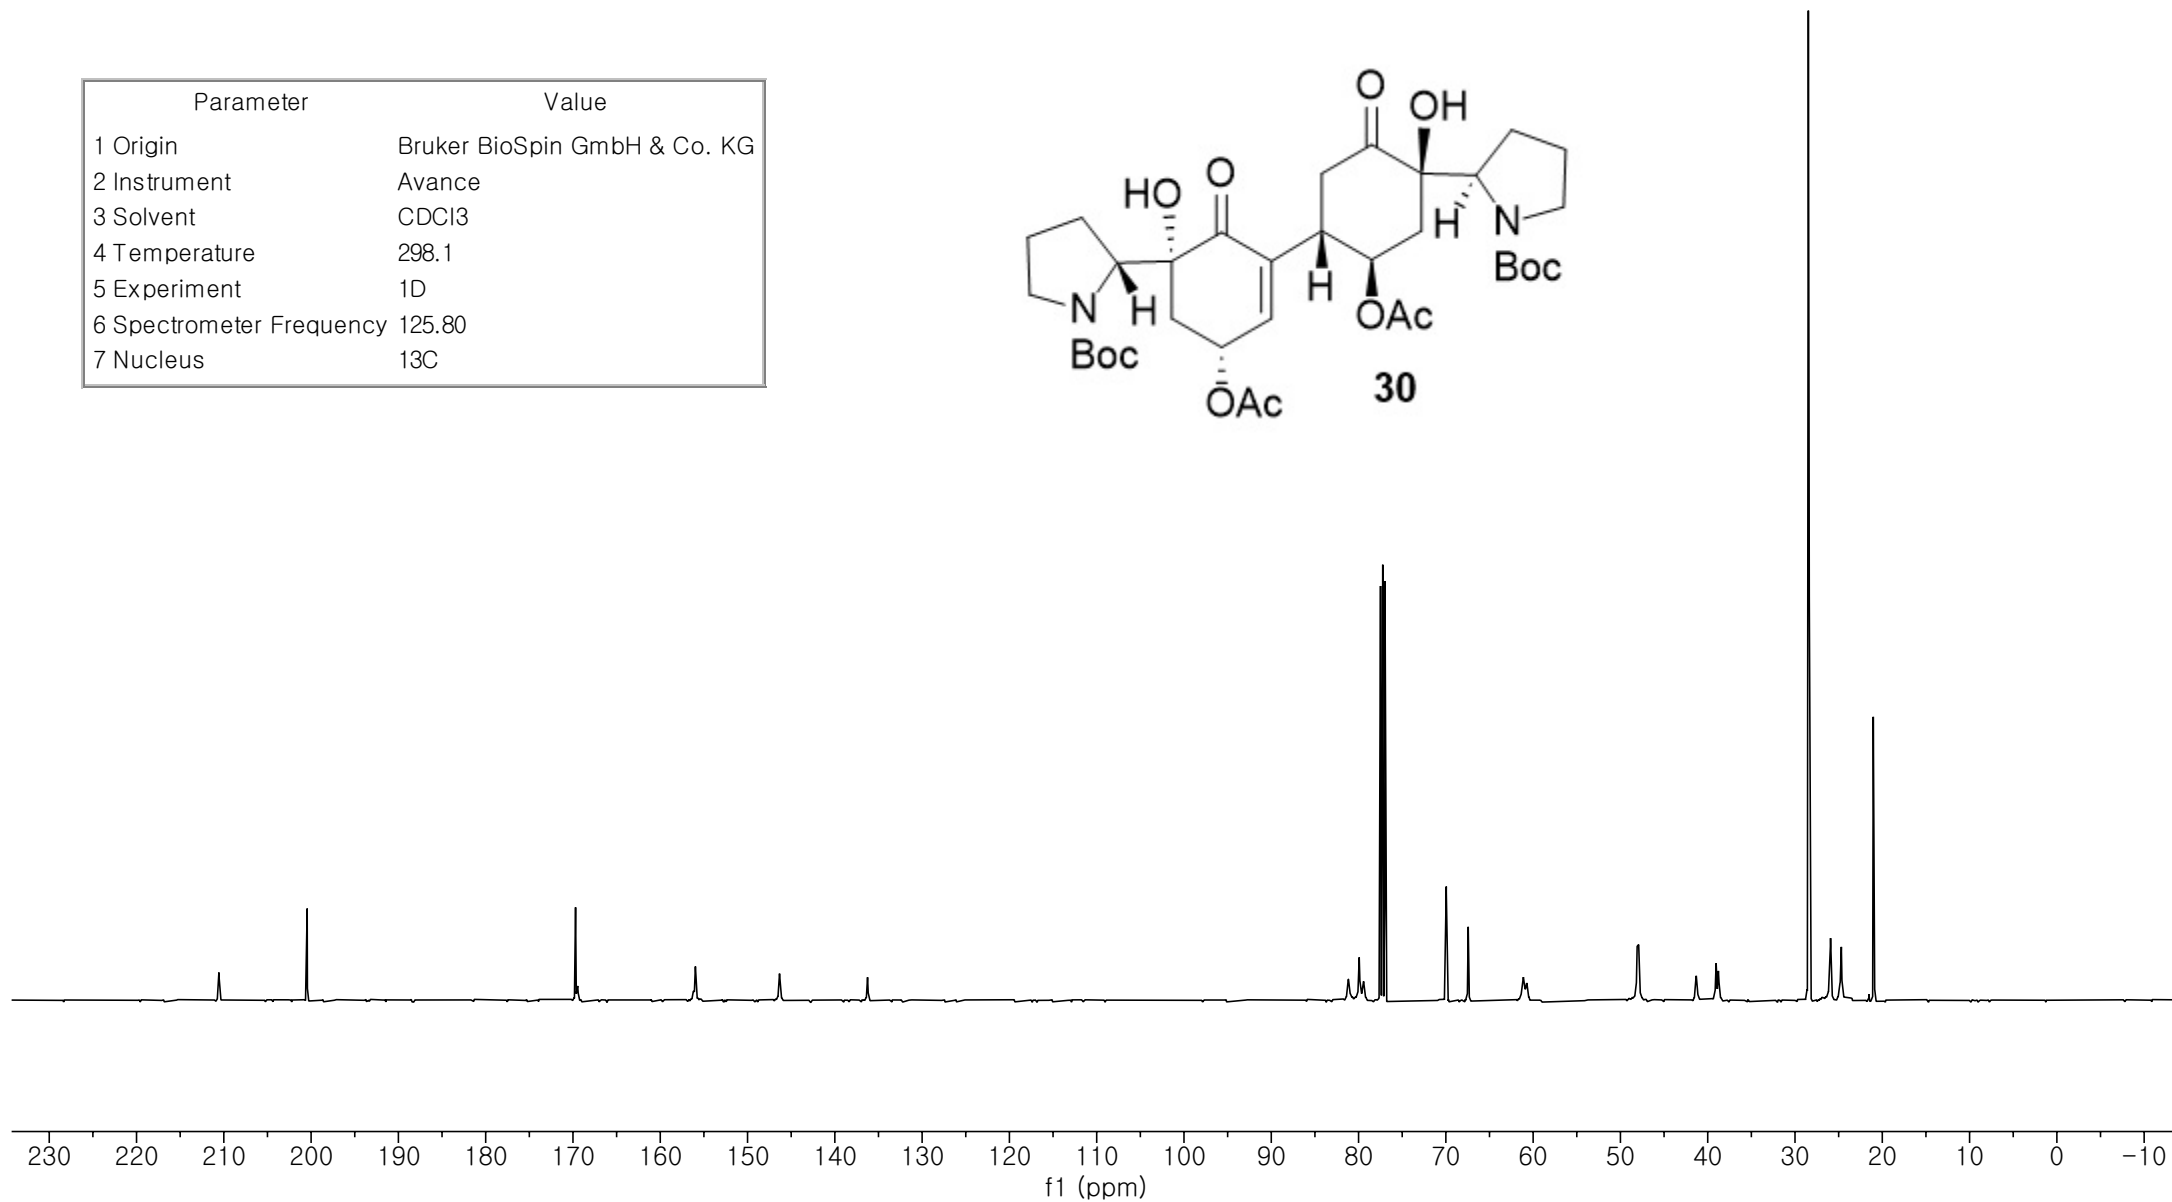

7.24 CDCl<sub>3</sub>

6.56  
6.56  
6.54  
6.54  
6.15  
6.14  
5.28  
4.51  
4.41  
4.36  
4.16  
4.15  
4.14  
4.14  
4.11  
4.07  
4.07  
4.05  
4.05  
3.60  
3.59  
3.58  
3.57  
3.56  
3.55  
3.44  
3.31  
3.30  
3.30  
3.28  
3.25  
3.24  
3.24  
3.23  
3.22  
3.21  
3.21  
3.10  
3.10  
2.86  
2.84  
2.83  
2.82  
2.68  
2.68  
2.40  
2.37  
2.31  
2.17  
2.03  
2.01  
2.00  
2.00  
1.99  
1.98  
1.97  
1.95  
1.94  
1.93  
1.92  
1.90  
1.89  
1.77  
1.73  
1.73  
1.72  
1.71  
1.70  
1.70  
1.69  
1.68  
1.67  
1.65  
1.57  
1.53  
1.53  
1.51  
1.49  
1.47  
1.46  
1.44  
1.37  
1.37  
1.17  
1.04  
1.03  
1.02  
1.02  
1.01  
1.00  
0.99  
0.97  
0.97  
0.95  
0.94  
0.94  
0.92  
0.86  
0.85  
0.85  
0.84  
0.83  
0.82  
0.14  
0.09  
0.08

| Parameter                | Value               |
|--------------------------|---------------------|
| 1 Origin                 | Bruker BioSpin GmbH |
| 2 Instrument             | Avance              |
| 3 Solvent                | CDCl <sub>3</sub>   |
| 4 Temperature            | 298.0               |
| 5 Experiment             | 1D                  |
| 6 Spectrometer Frequency | 500.23              |
| 7 Nucleus                | <sup>1</sup> H      |

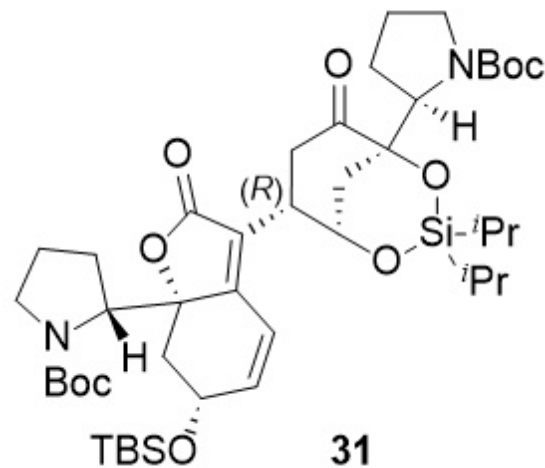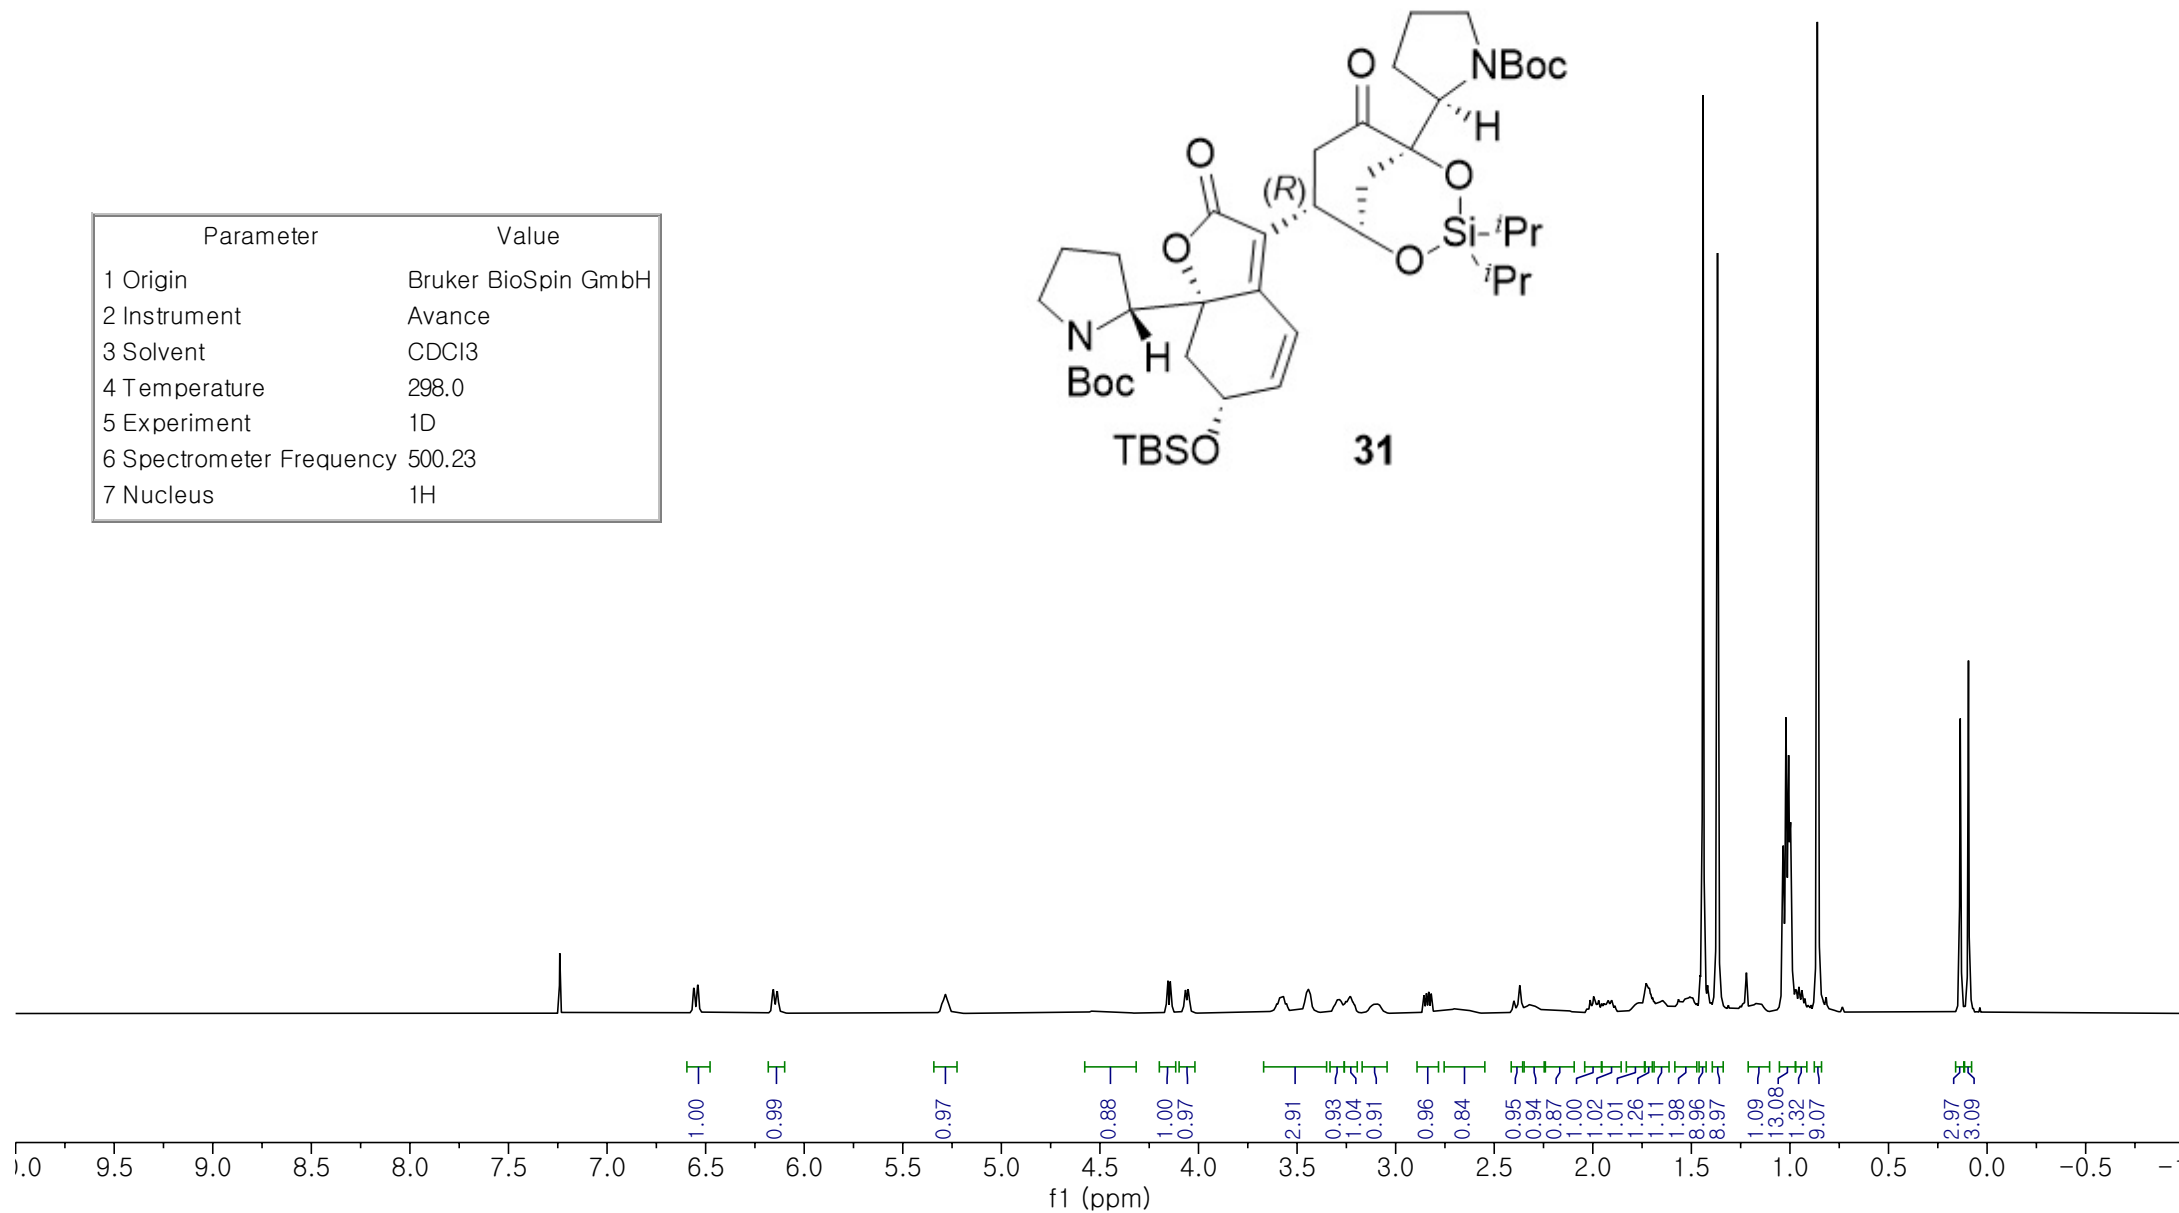

| Parameter                | Value               |
|--------------------------|---------------------|
| 1 Origin                 | Bruker BioSpin GmbH |
| 2 Instrument             | Avance              |
| 3 Solvent                | CDCl <sub>3</sub>   |
| 4 Temperature            | 298.0               |
| 5 Experiment             | 1D                  |
| 6 Spectrometer Frequency | 125.80              |
| 7 Nucleus                | <sup>13</sup> C     |

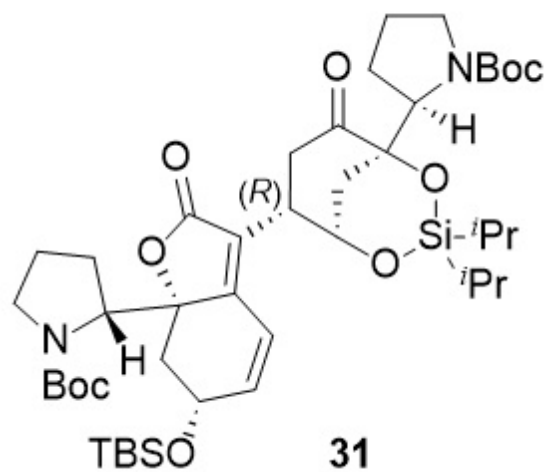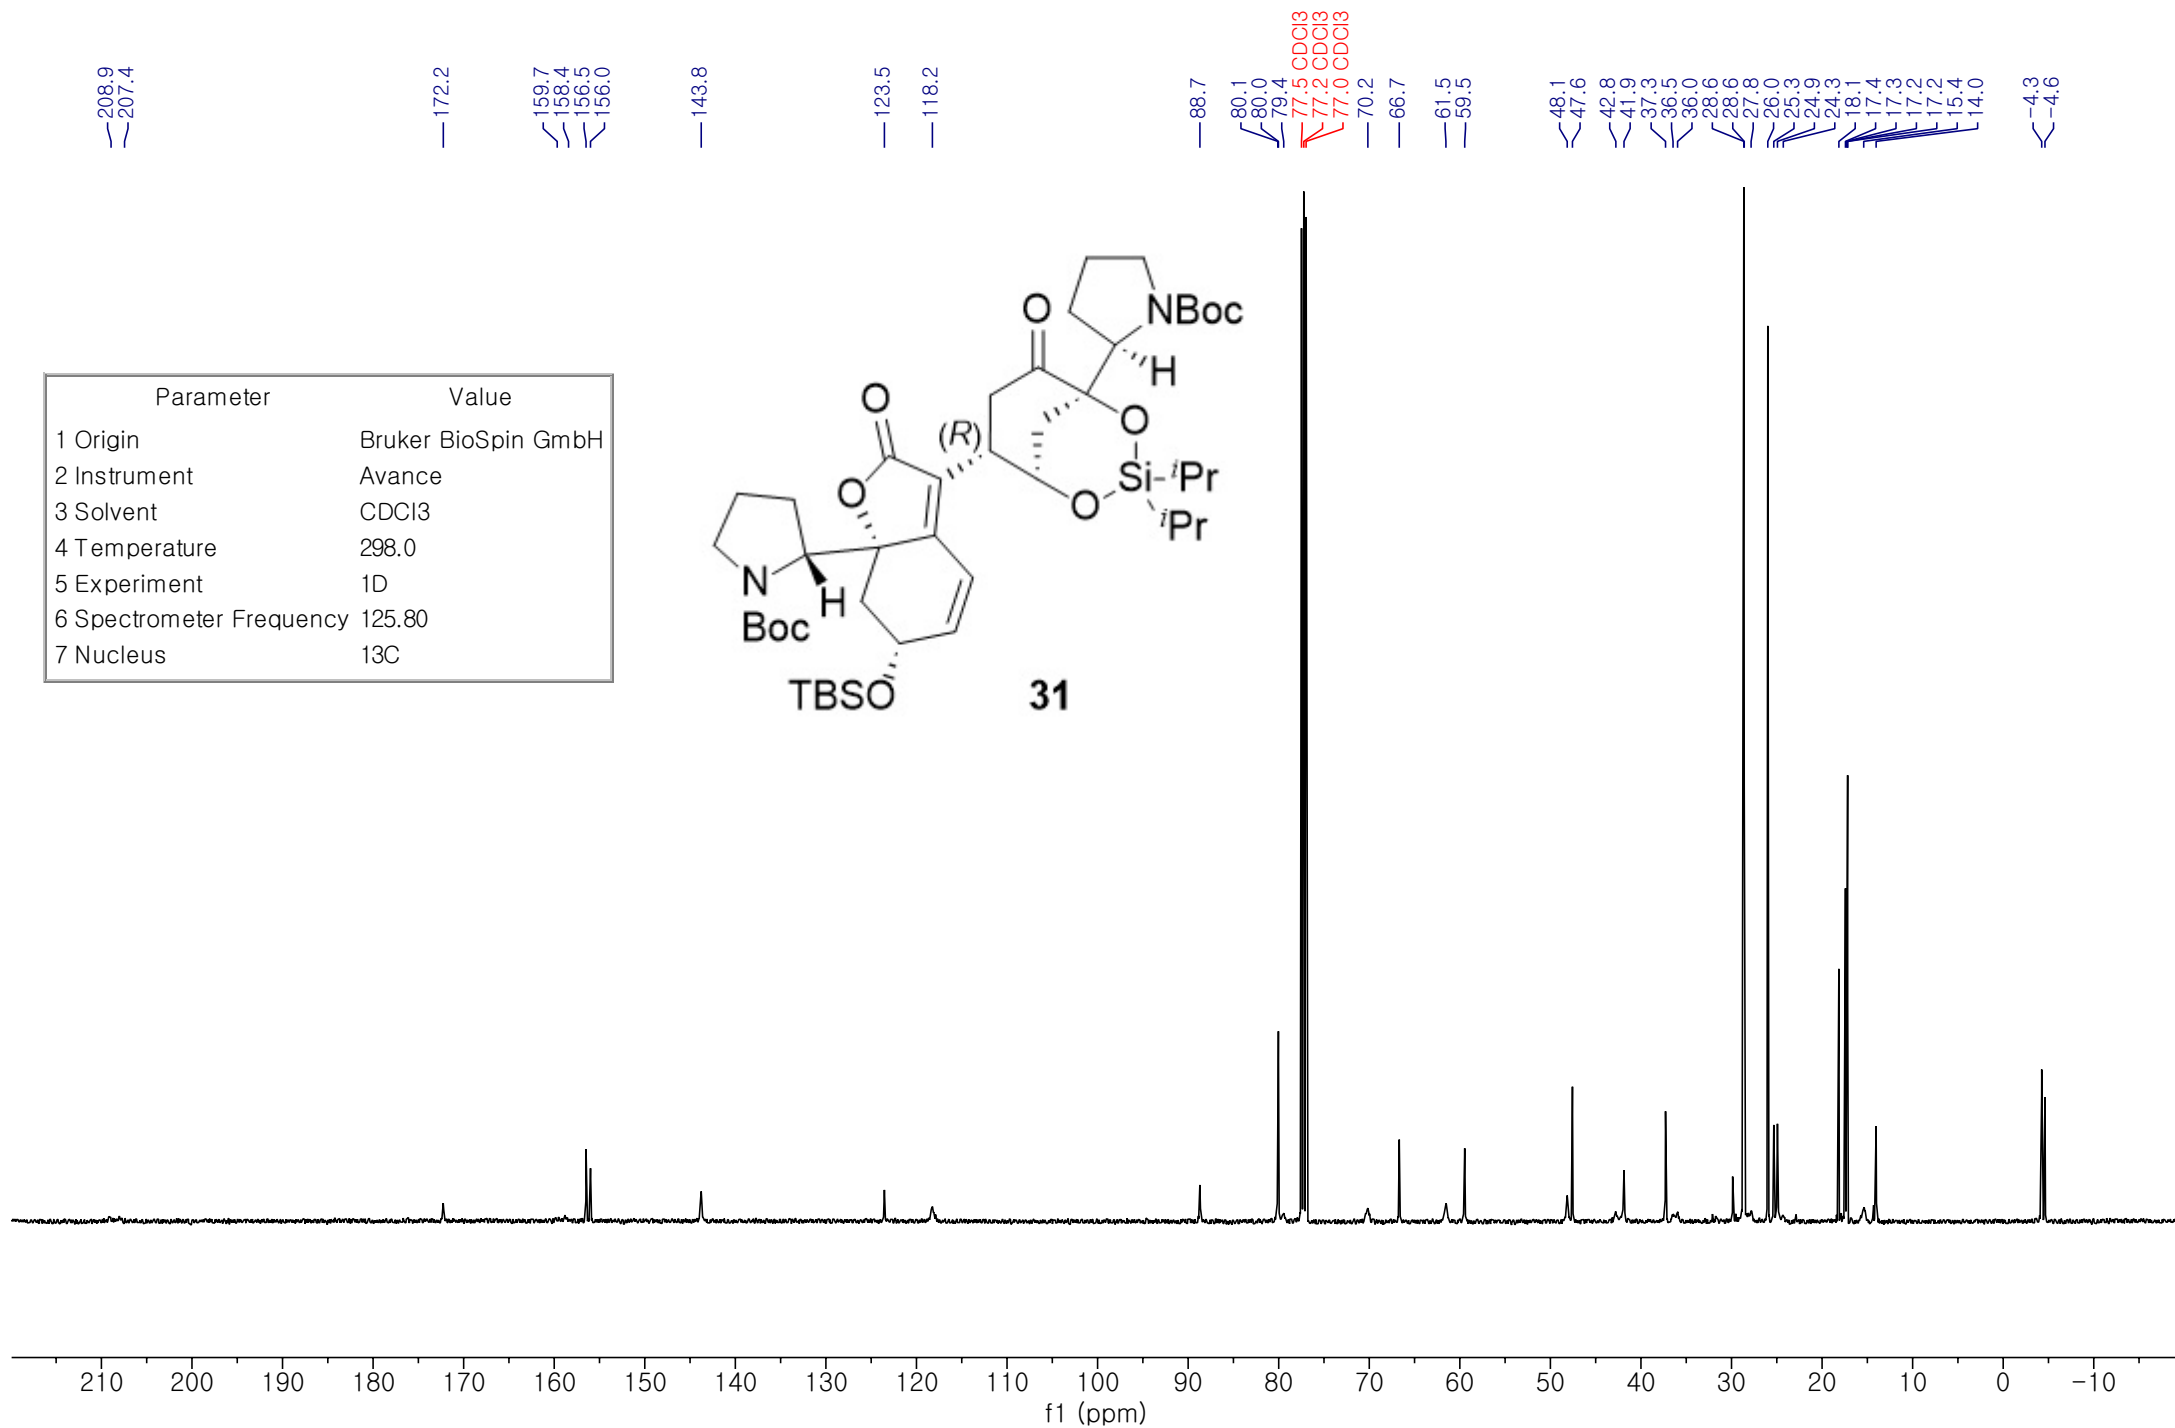

$^{13}\text{C}$  NMR (126 MHz) spectrum of **31** in  $\text{CDCl}_3$  at 298 K

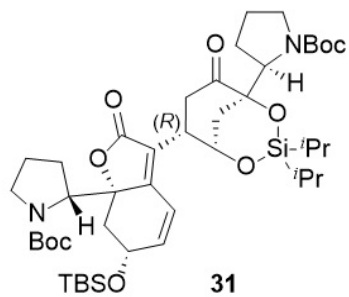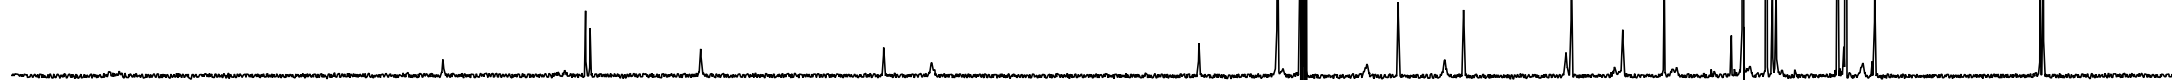

$^{13}\text{C}$  NMR (126 MHz) spectrum of **31** in  $\text{CDCl}_3$  at 273 K

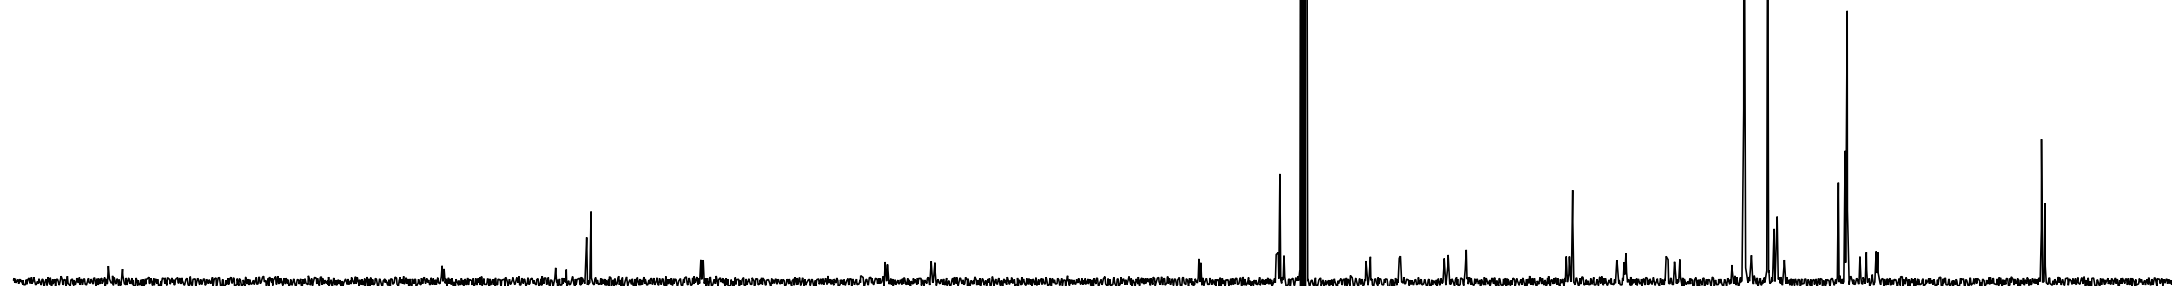

$^{13}\text{C}$  NMR (126 MHz) spectrum of **31** in  $\text{CDCl}_3$  at 253 K

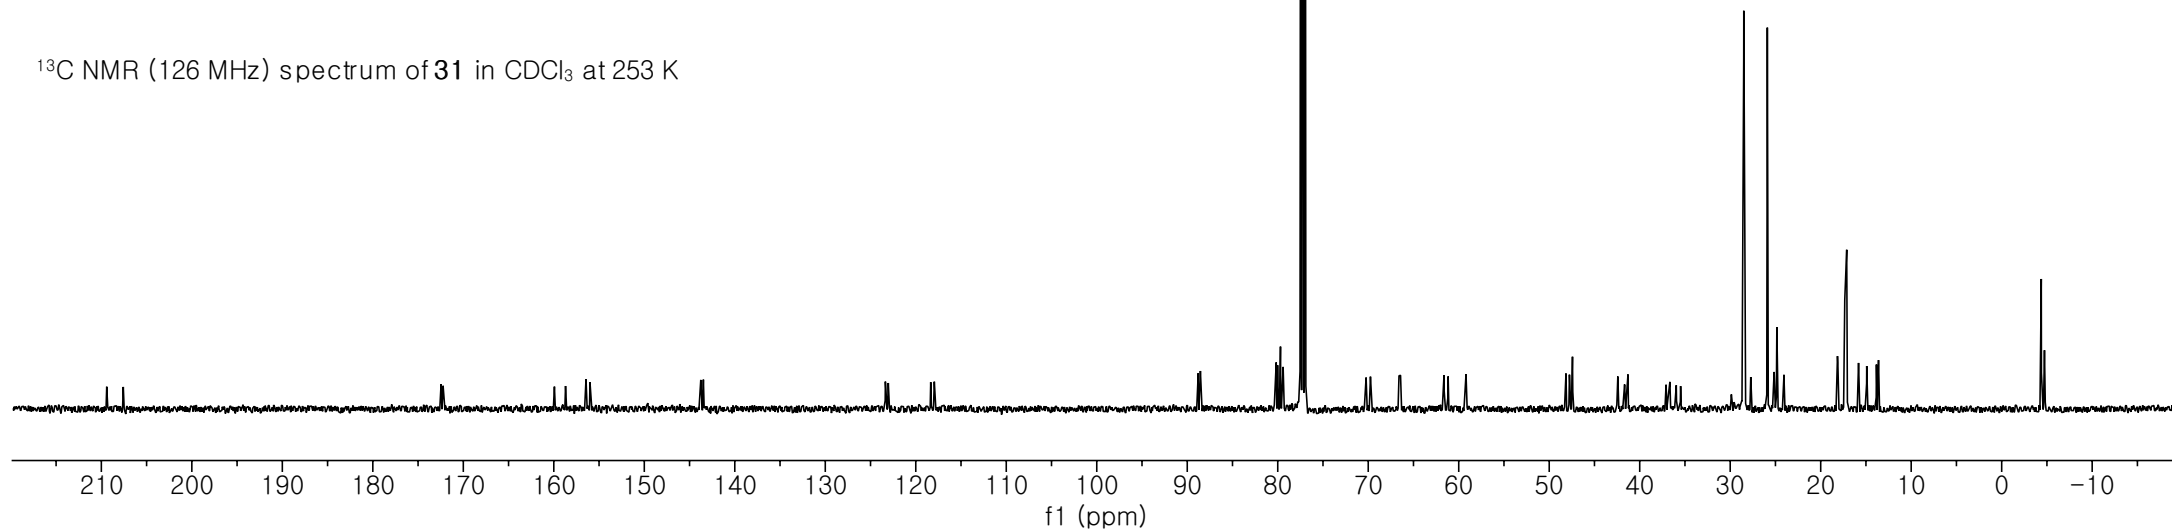

— 7.24 CDCl<sub>3</sub>

6.61  
6.60

6.10  
6.08  
6.08  
5.92  
5.76

4.42  
4.41  
4.40  
4.39

4.04  
4.02  
3.62  
3.59  
3.53  
3.51

3.40  
3.39  
3.38  
3.37  
3.37  
3.36  
3.35  
3.35  
3.34  
3.34  
3.32  
3.32  
3.03  
3.02

3.01  
2.95  
2.94  
2.93  
2.92  
2.01  
1.99  
1.92  
1.90  
1.88  
1.87  
1.86  
1.85  
1.84  
1.83  
1.82  
1.79  
1.78  
1.77  
1.76  
1.75  
1.75  
1.68  
1.65  
1.60  
1.58  
1.57  
1.44  
1.42

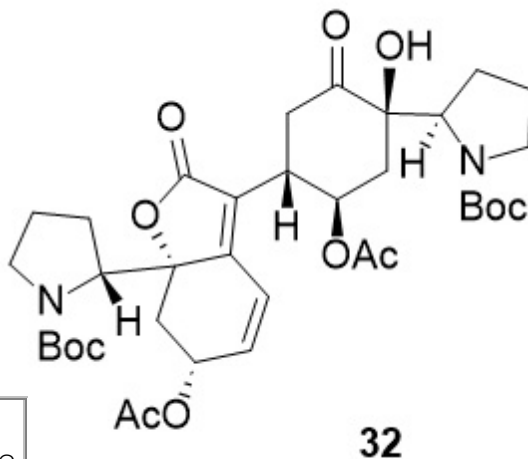

| Parameter                | Value                        |
|--------------------------|------------------------------|
| 1 Origin                 | Bruker BioSpin GmbH & Co. KG |
| 2 Instrument             | Avance                       |
| 3 Solvent                | CDCl <sub>3</sub>            |
| 4 Temperature            | 298.0                        |
| 5 Experiment             | 1D                           |
| 6 Spectrometer Frequency | 500.23                       |
| 7 Nucleus                | <sup>1</sup> H               |

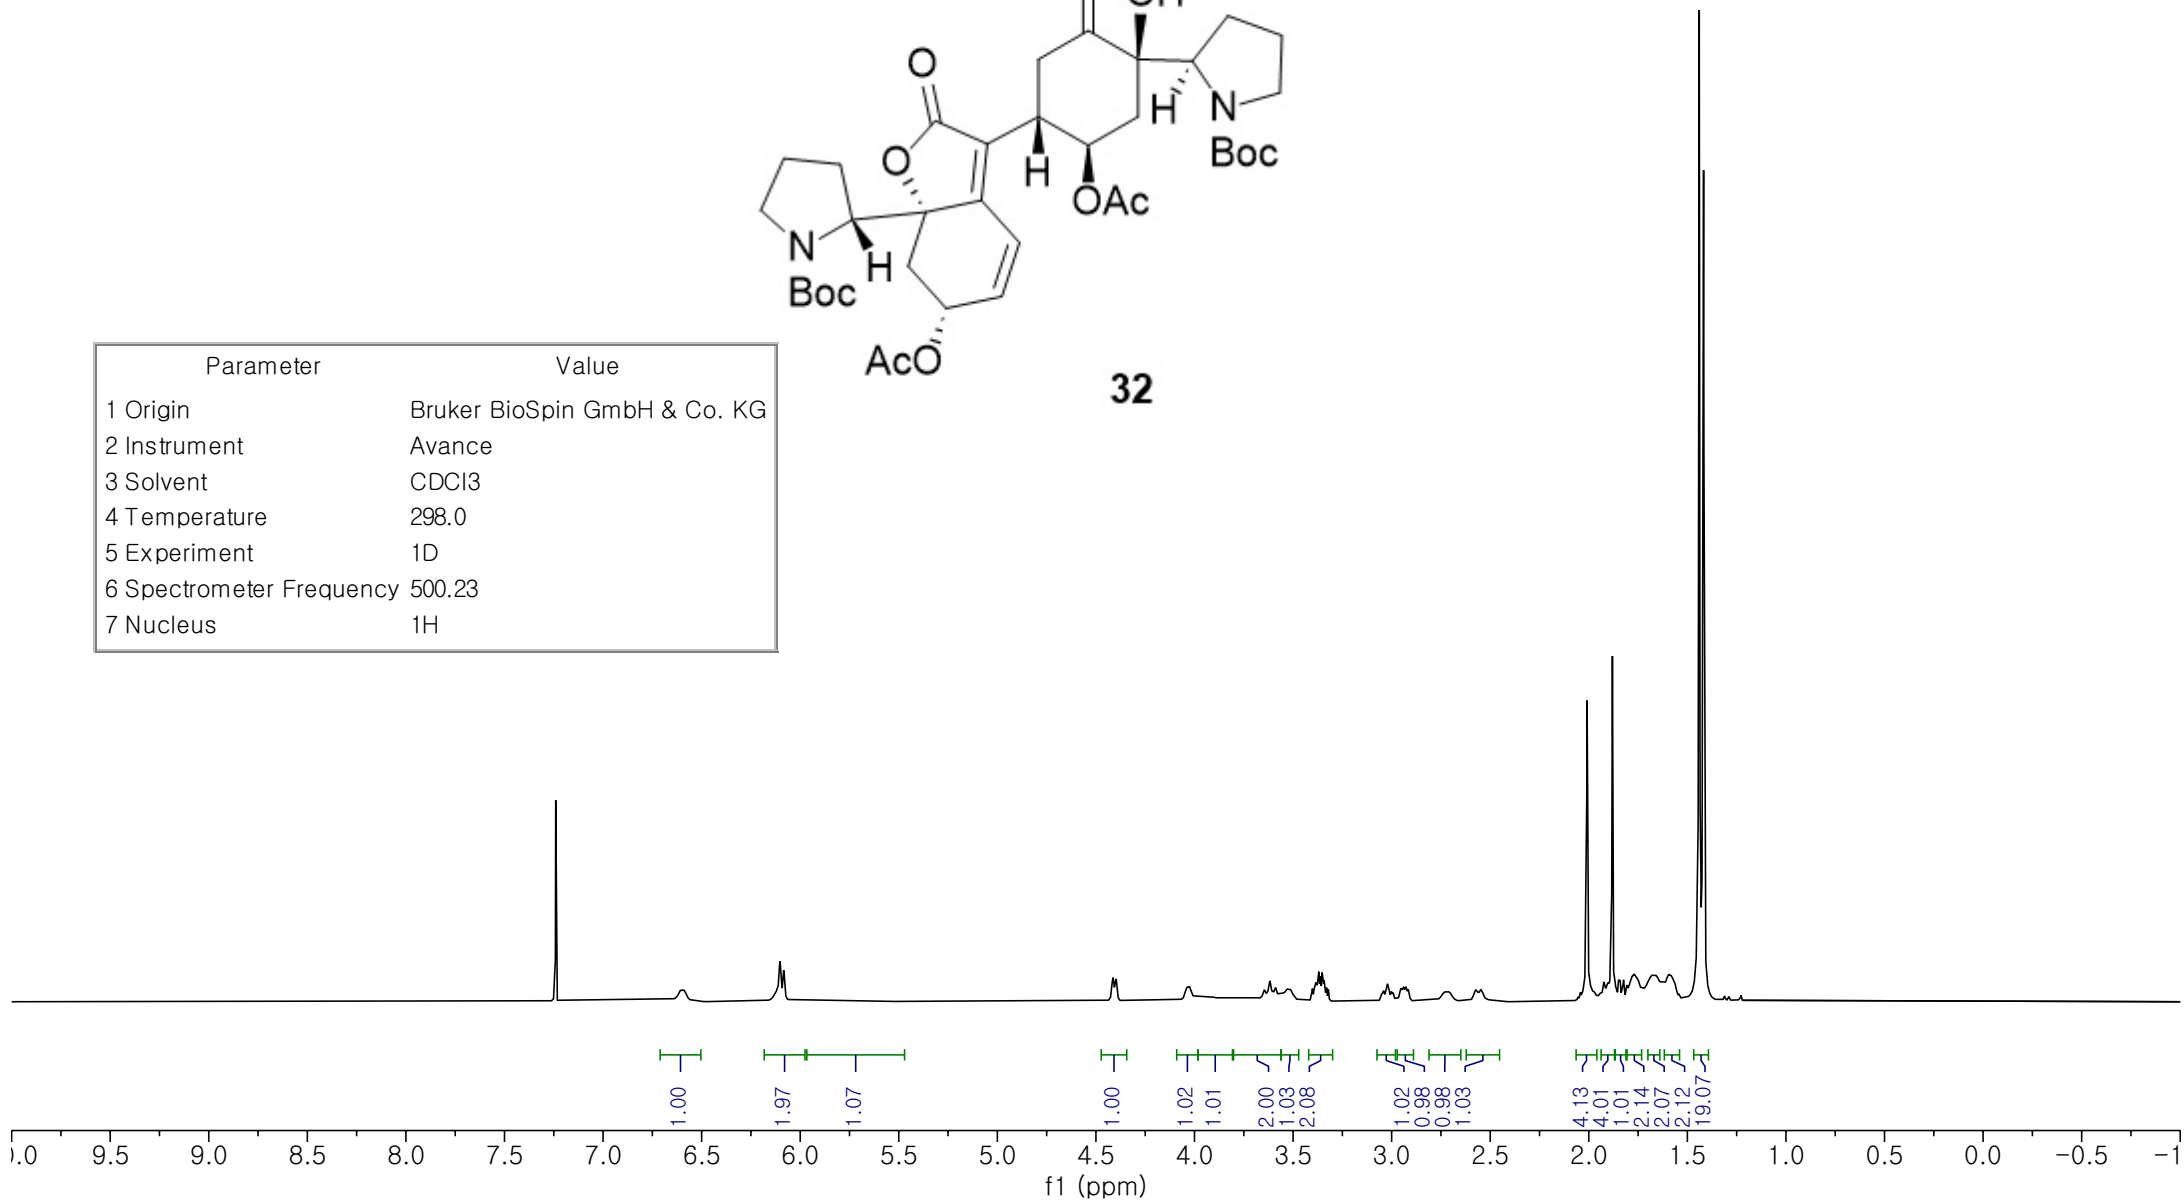

— 210.2

— 171.0  
 — 169.8  
 — 169.6

— 159.2  
 — 156.1

— 136.6

— 122.5  
 — 121.1

— 87.3

— 81.3

— 80.2

— 77.5 CDCI3

— 77.2 CDCI3

— 77.0 CDCI3

— 69.4

— 68.5

— 60.7

— 60.4

— 47.9

— 47.5

— 41.6

— 38.7

— 36.6

— 28.5

— 28.4

— 26.3

— 25.6

— 24.7

— 21.1

| Parameter                | Value                        |
|--------------------------|------------------------------|
| 1 Origin                 | Bruker BioSpin GmbH & Co. KG |
| 2 Instrument             | Avance                       |
| 3 Solvent                | CDCl3                        |
| 4 Temperature            | 298.4                        |
| 5 Experiment             | 1D                           |
| 6 Spectrometer Frequency | 125.80                       |
| 7 Nucleus                | 13C                          |

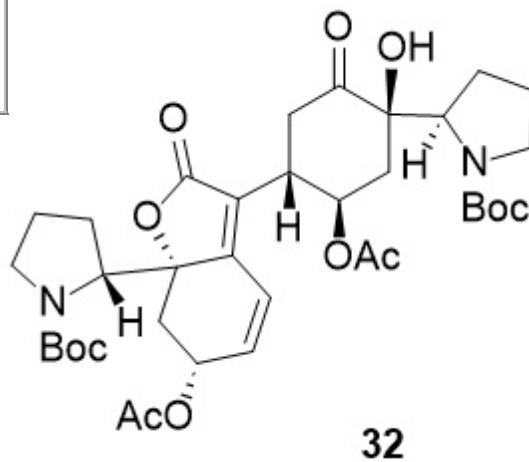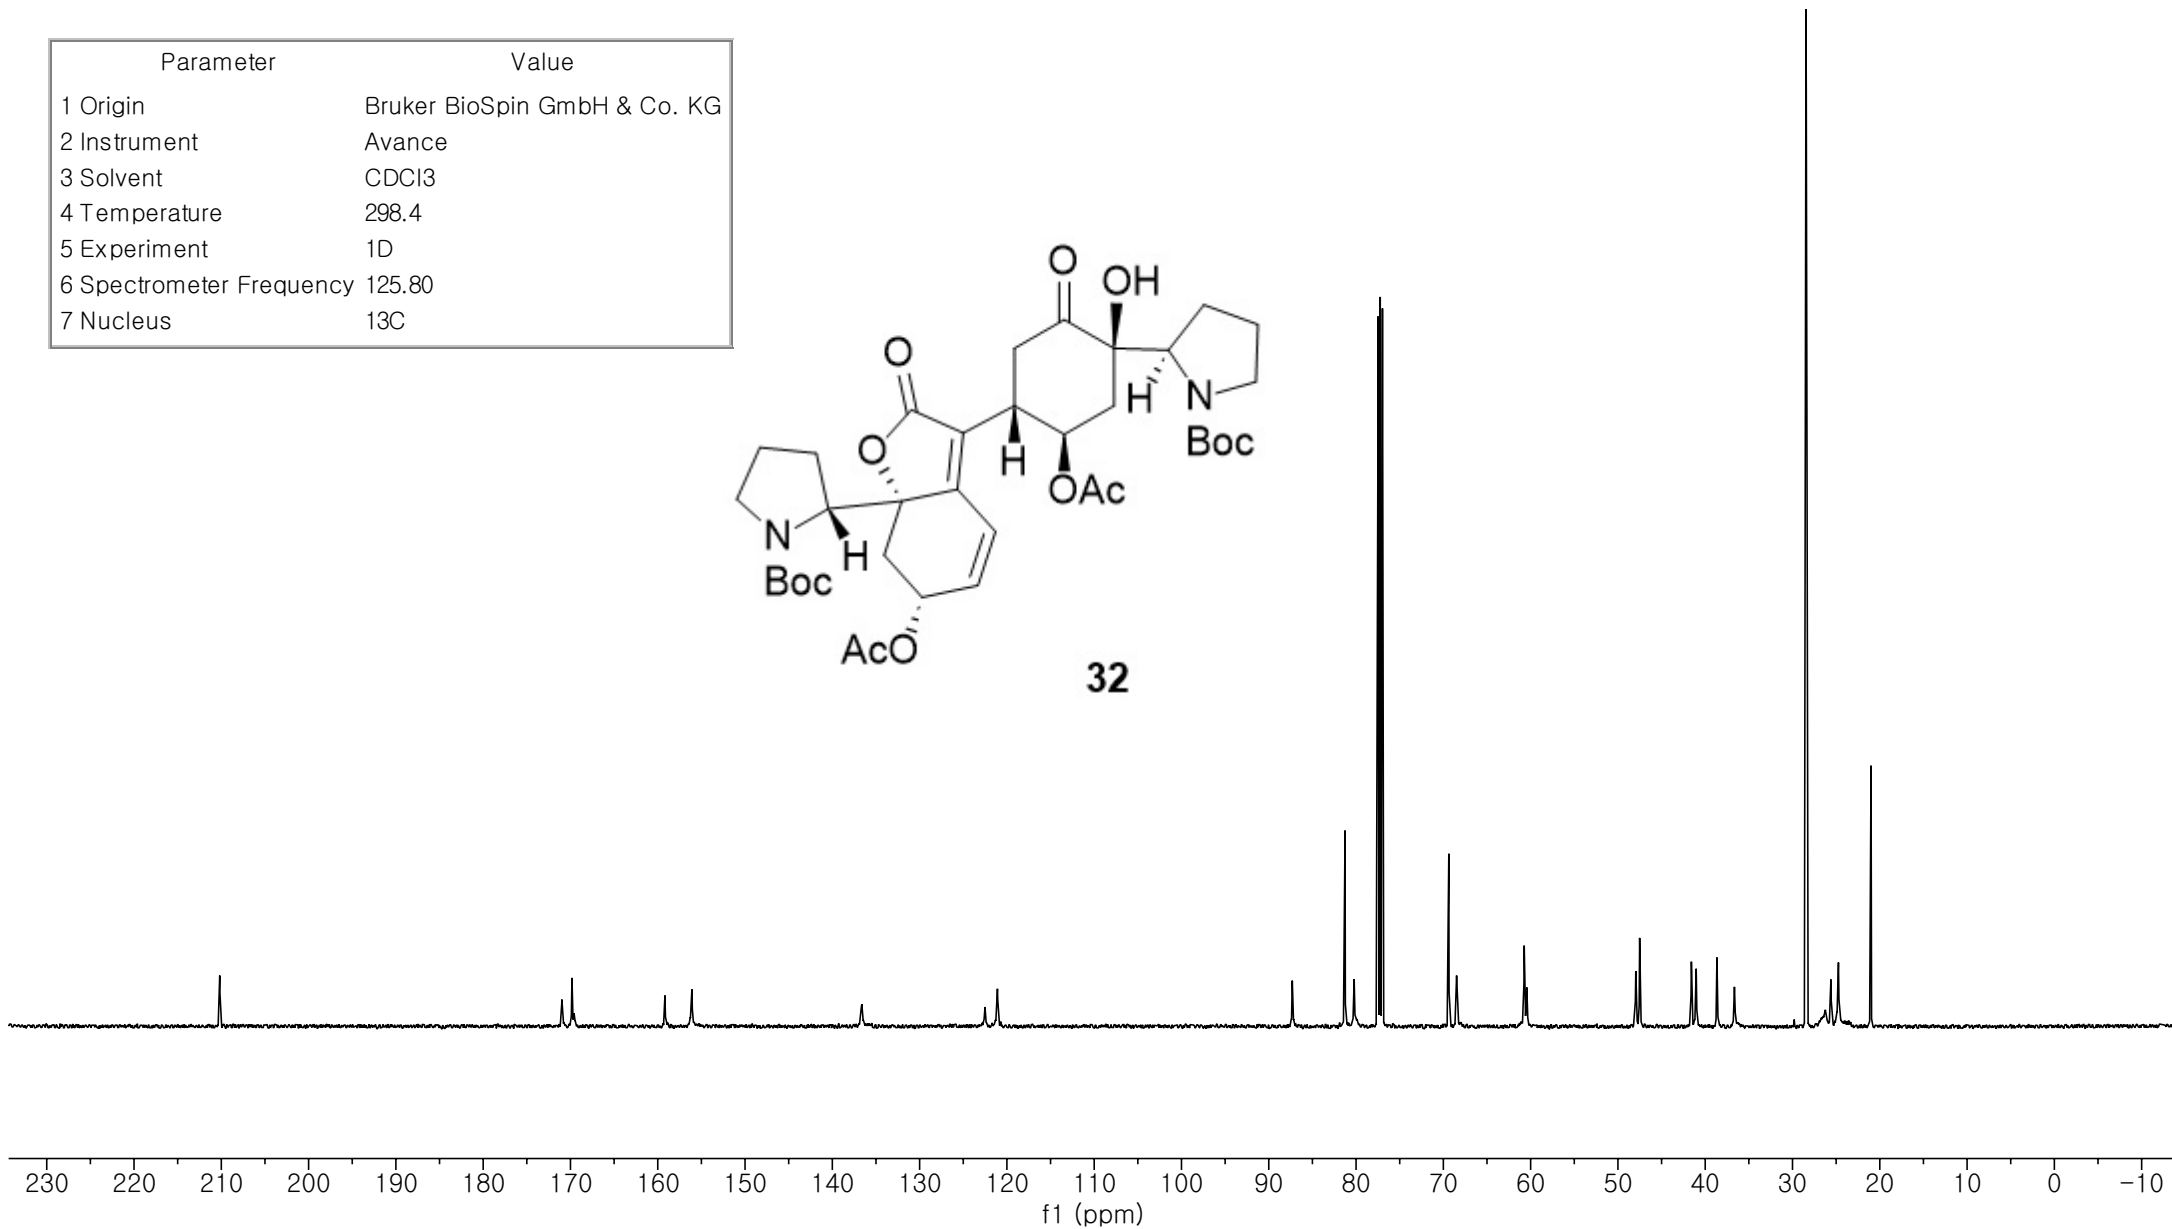

— 7.28 CDCl3

6.37  
6.21  
6.02  
5.92  
5.77

4.33  
4.31  
4.15  
4.13  
3.62  
3.48  
3.47  
3.46  
3.43  
3.41  
3.40  
3.39  
3.38  
3.06  
3.05  
3.04  
3.03  
3.02  
2.87  
2.86  
2.85  
2.84  
2.67  
2.64  
2.61  
2.55  
2.53  
2.51  
2.04  
1.97  
1.89  
1.87  
1.83  
1.81  
1.81  
1.80  
1.79  
1.78  
1.77  
1.76  
1.75  
1.70  
1.69  
1.66  
1.64  
1.62  
1.61  
1.60  
1.50  
1.49

| Parameter                | Value                        |
|--------------------------|------------------------------|
| 1 Origin                 | Bruker BioSpin GmbH & Co. KG |
| 2 Instrument             | Avance                       |
| 3 Solvent                | CDCl3                        |
| 4 Temperature            | 298.0                        |
| 5 Experiment             | 1D                           |
| 6 Spectrometer Frequency | 500.23                       |
| 7 Nucleus                | 1H                           |

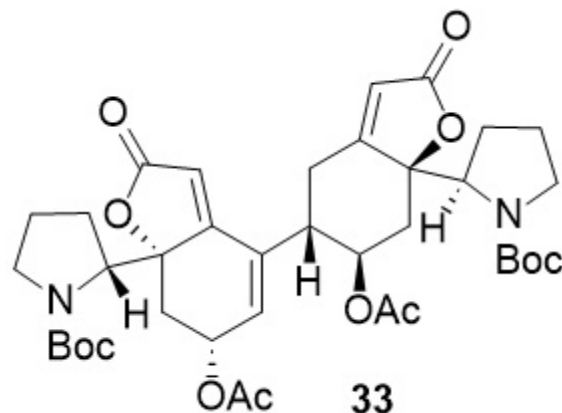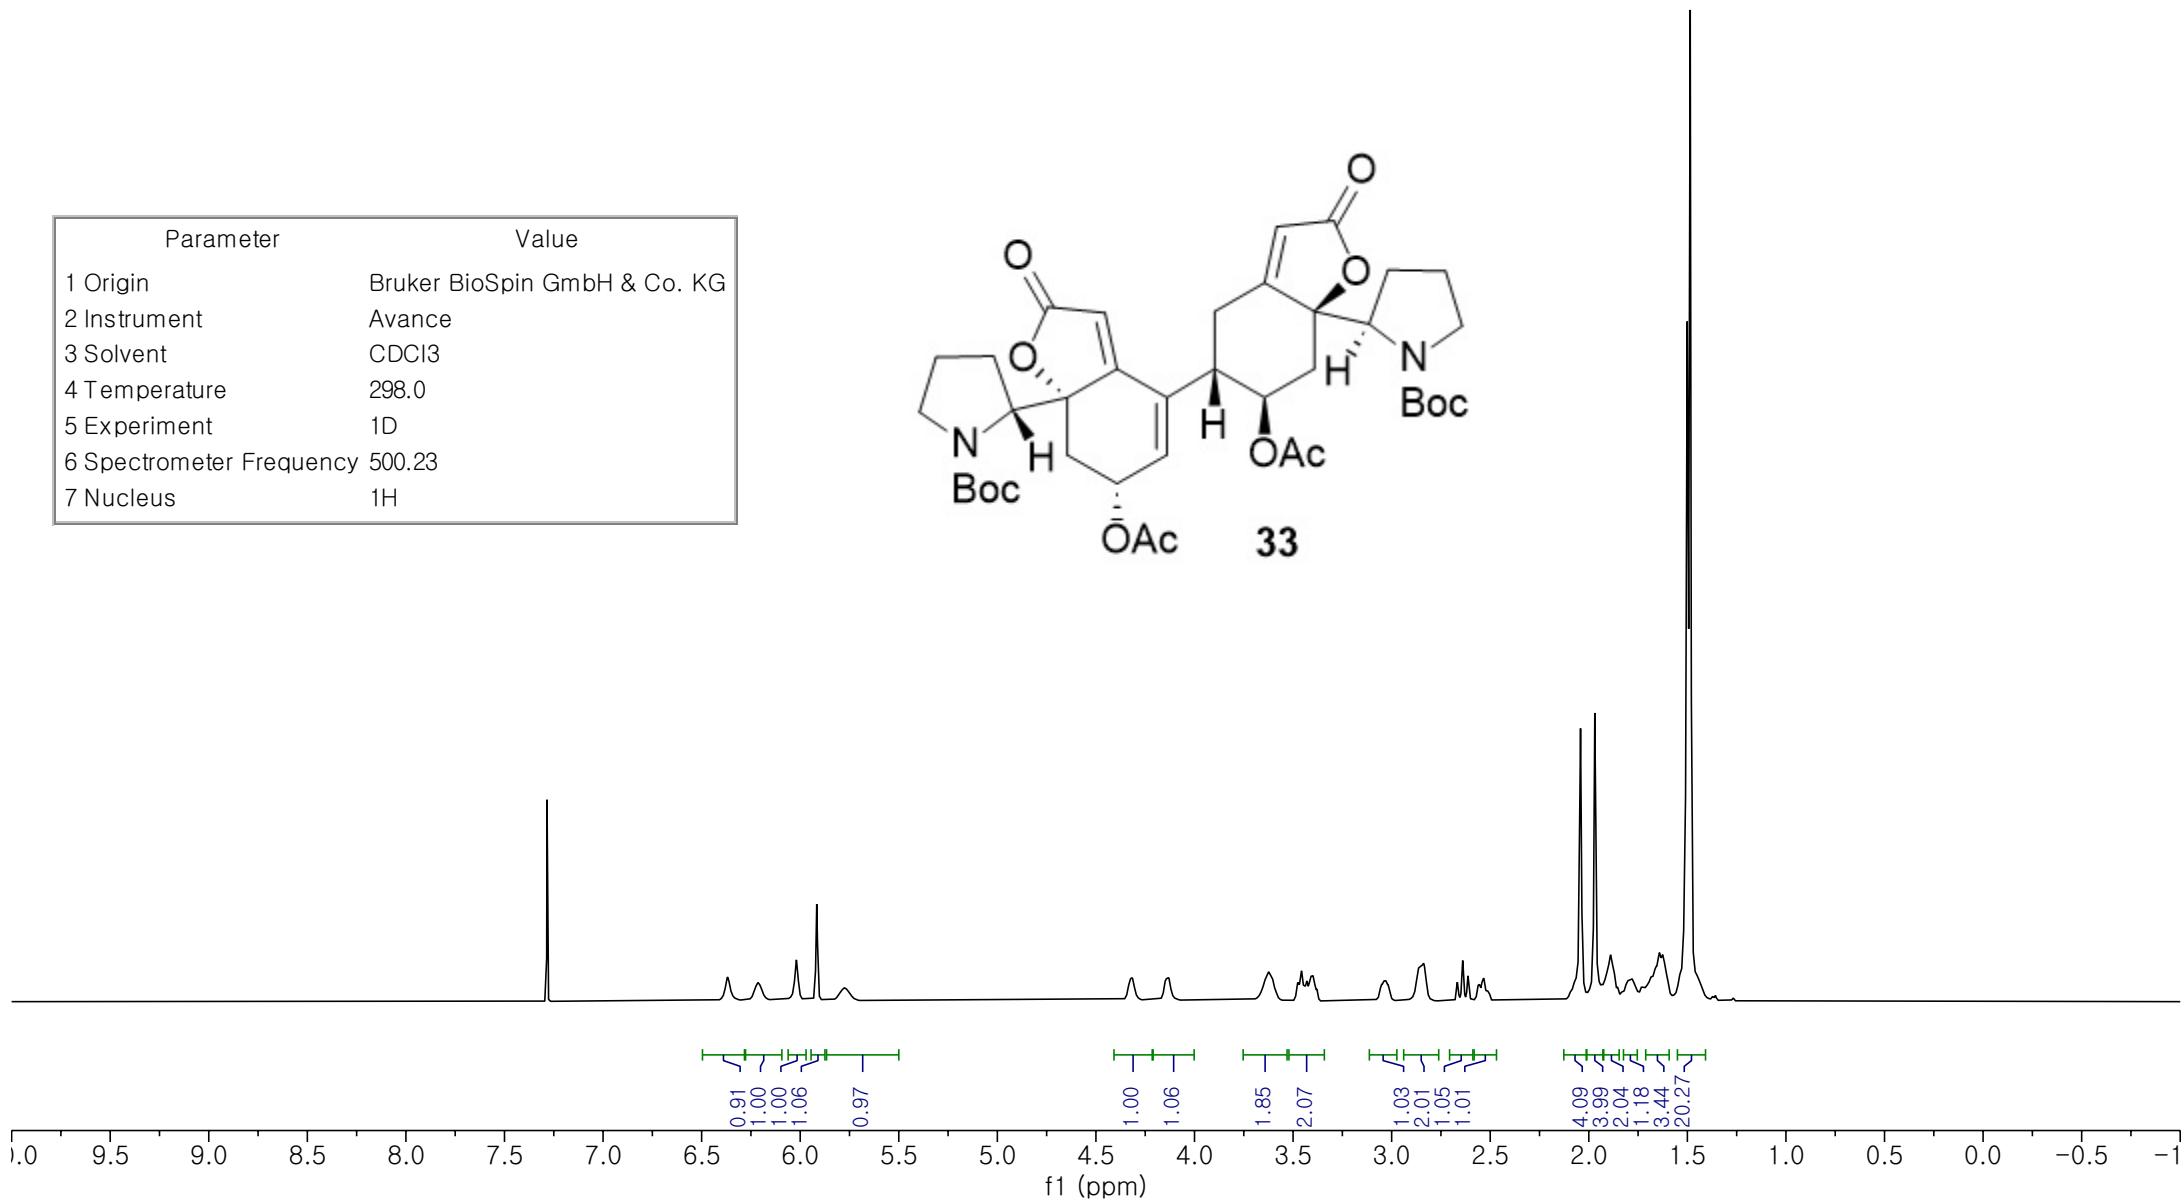

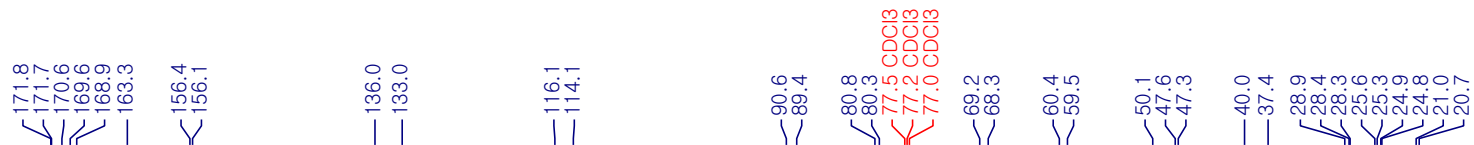

| Parameter                | Value                        |
|--------------------------|------------------------------|
| 1 Origin                 | Bruker BioSpin GmbH & Co. KG |
| 2 Instrument             | Avance                       |
| 3 Solvent                | CDCl3                        |
| 4 Temperature            | 298.3                        |
| 5 Experiment             | 1D                           |
| 6 Spectrometer Frequency | 125.80                       |
| 7 Nucleus                | 13C                          |

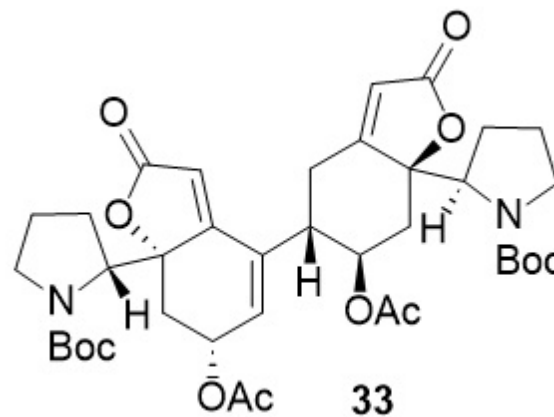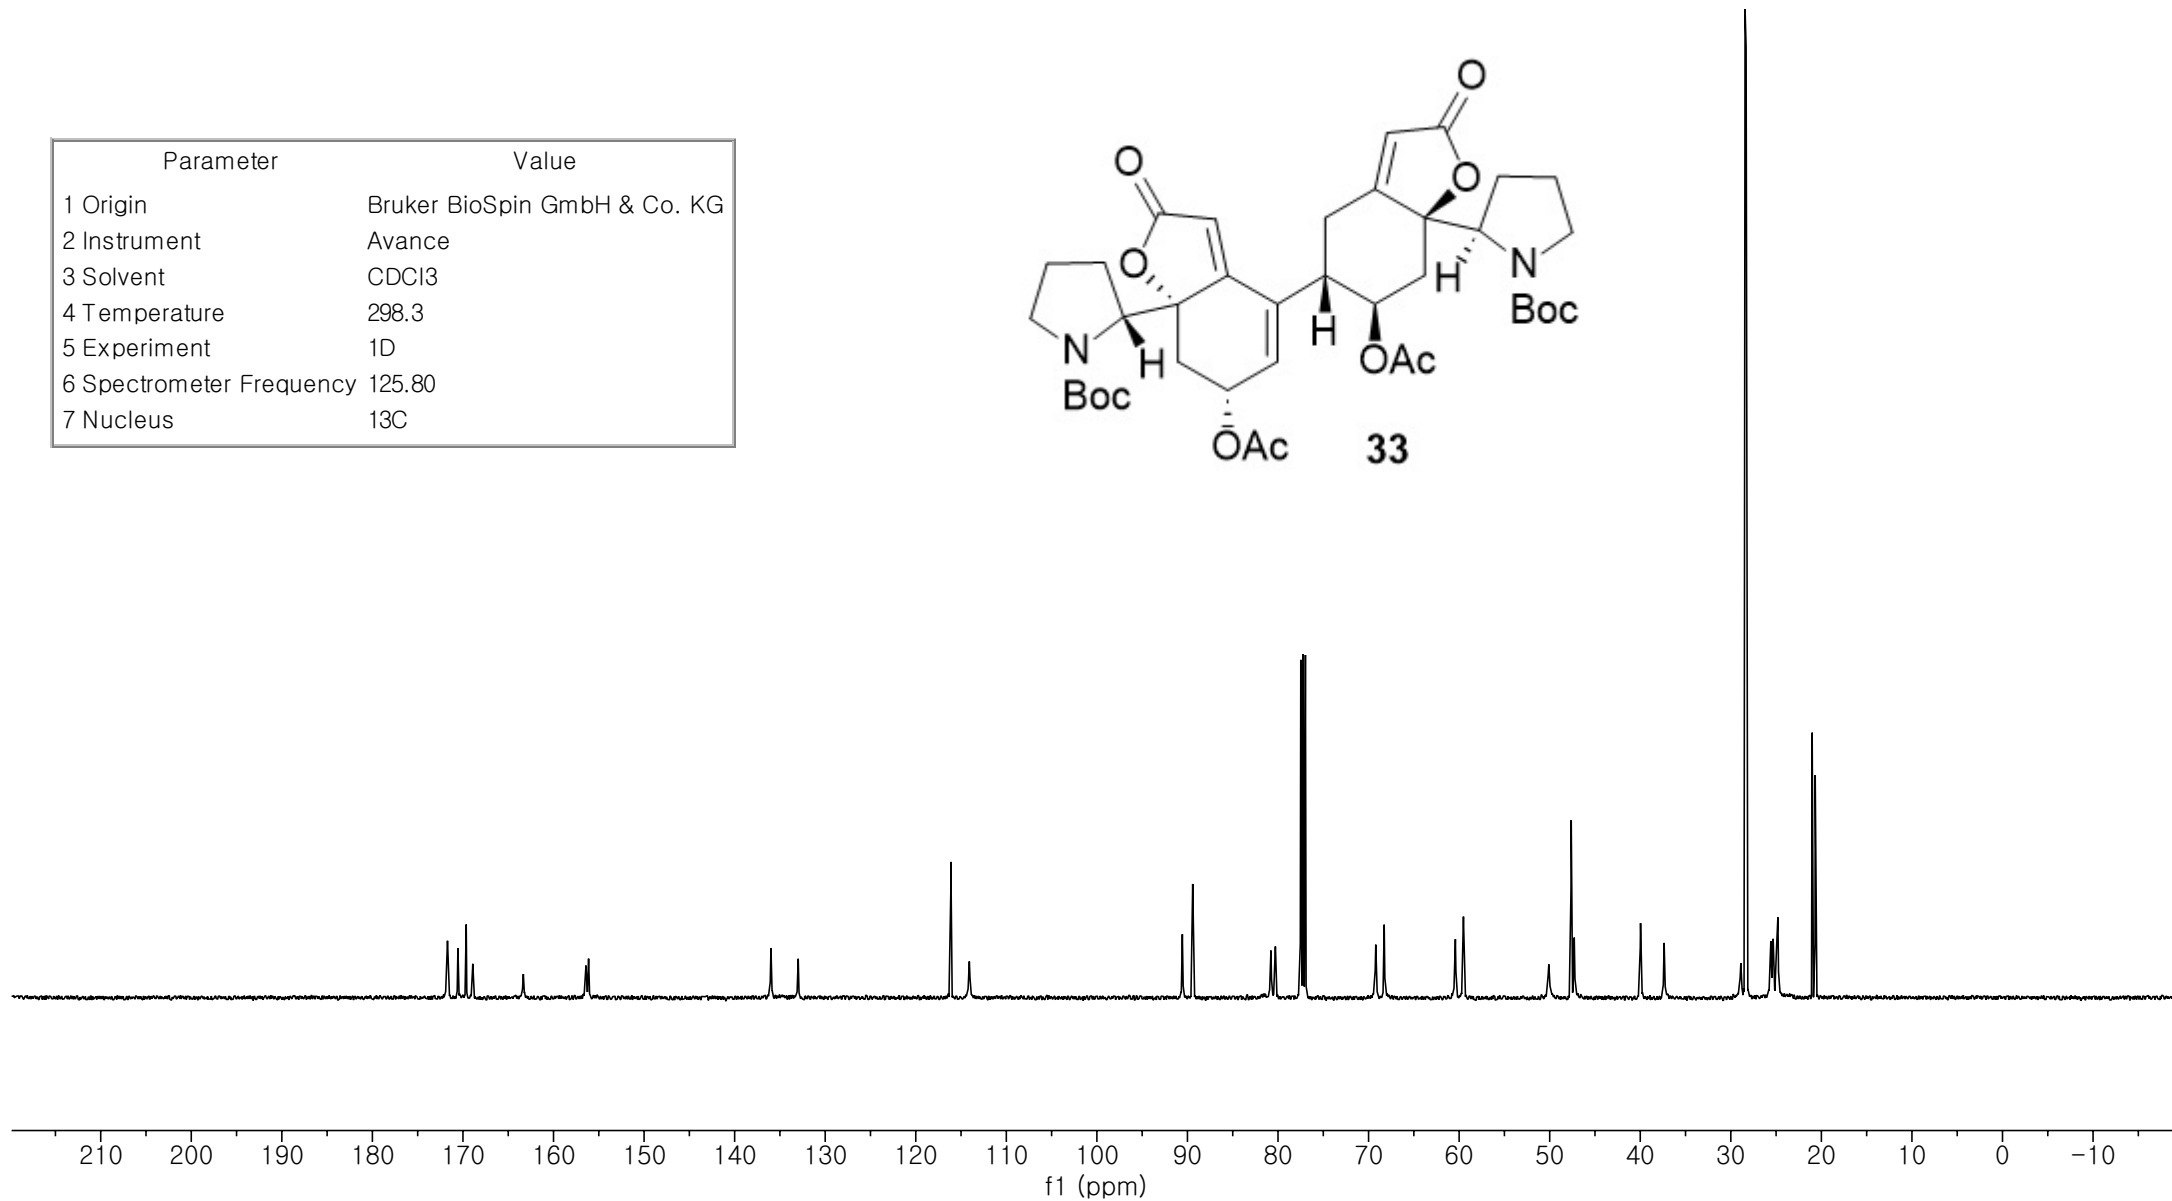



— 7.24 CDCl3

6.42  
6.42

5.98  
5.88

5.23

4.44  
4.43  
4.42  
4.41  
4.40  
4.39  
4.36  
4.34  
4.02  
4.00

3.56  
3.55  
3.54  
3.52  
3.51  
3.42  
3.42  
3.41  
3.40  
3.39  
3.31  
3.10  
3.08  
3.07  
2.89  
2.87  
2.81  
2.79  
2.78  
2.78  
2.48  
2.46  
2.45  
2.44  
2.44  
1.77  
1.76  
1.75  
1.74  
1.73  
1.72  
1.72  
1.71  
1.70  
1.63  
1.61  
1.59  
1.56  
1.55  
1.54  
1.54  
1.52  
1.48  
1.45  
1.42  
1.39  
1.36

| Parameter                | Value                        |
|--------------------------|------------------------------|
| 1 Origin                 | Bruker BioSpin GmbH & Co. KG |
| 2 Instrument             | Avance                       |
| 3 Solvent                | CDCl3                        |
| 4 Temperature            | 298.0                        |
| 5 Experiment             | 1D                           |
| 6 Spectrometer Frequency | 500.23                       |
| 7 Nucleus                | 1H                           |

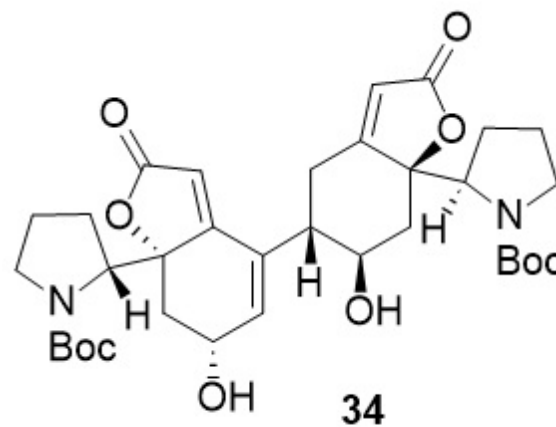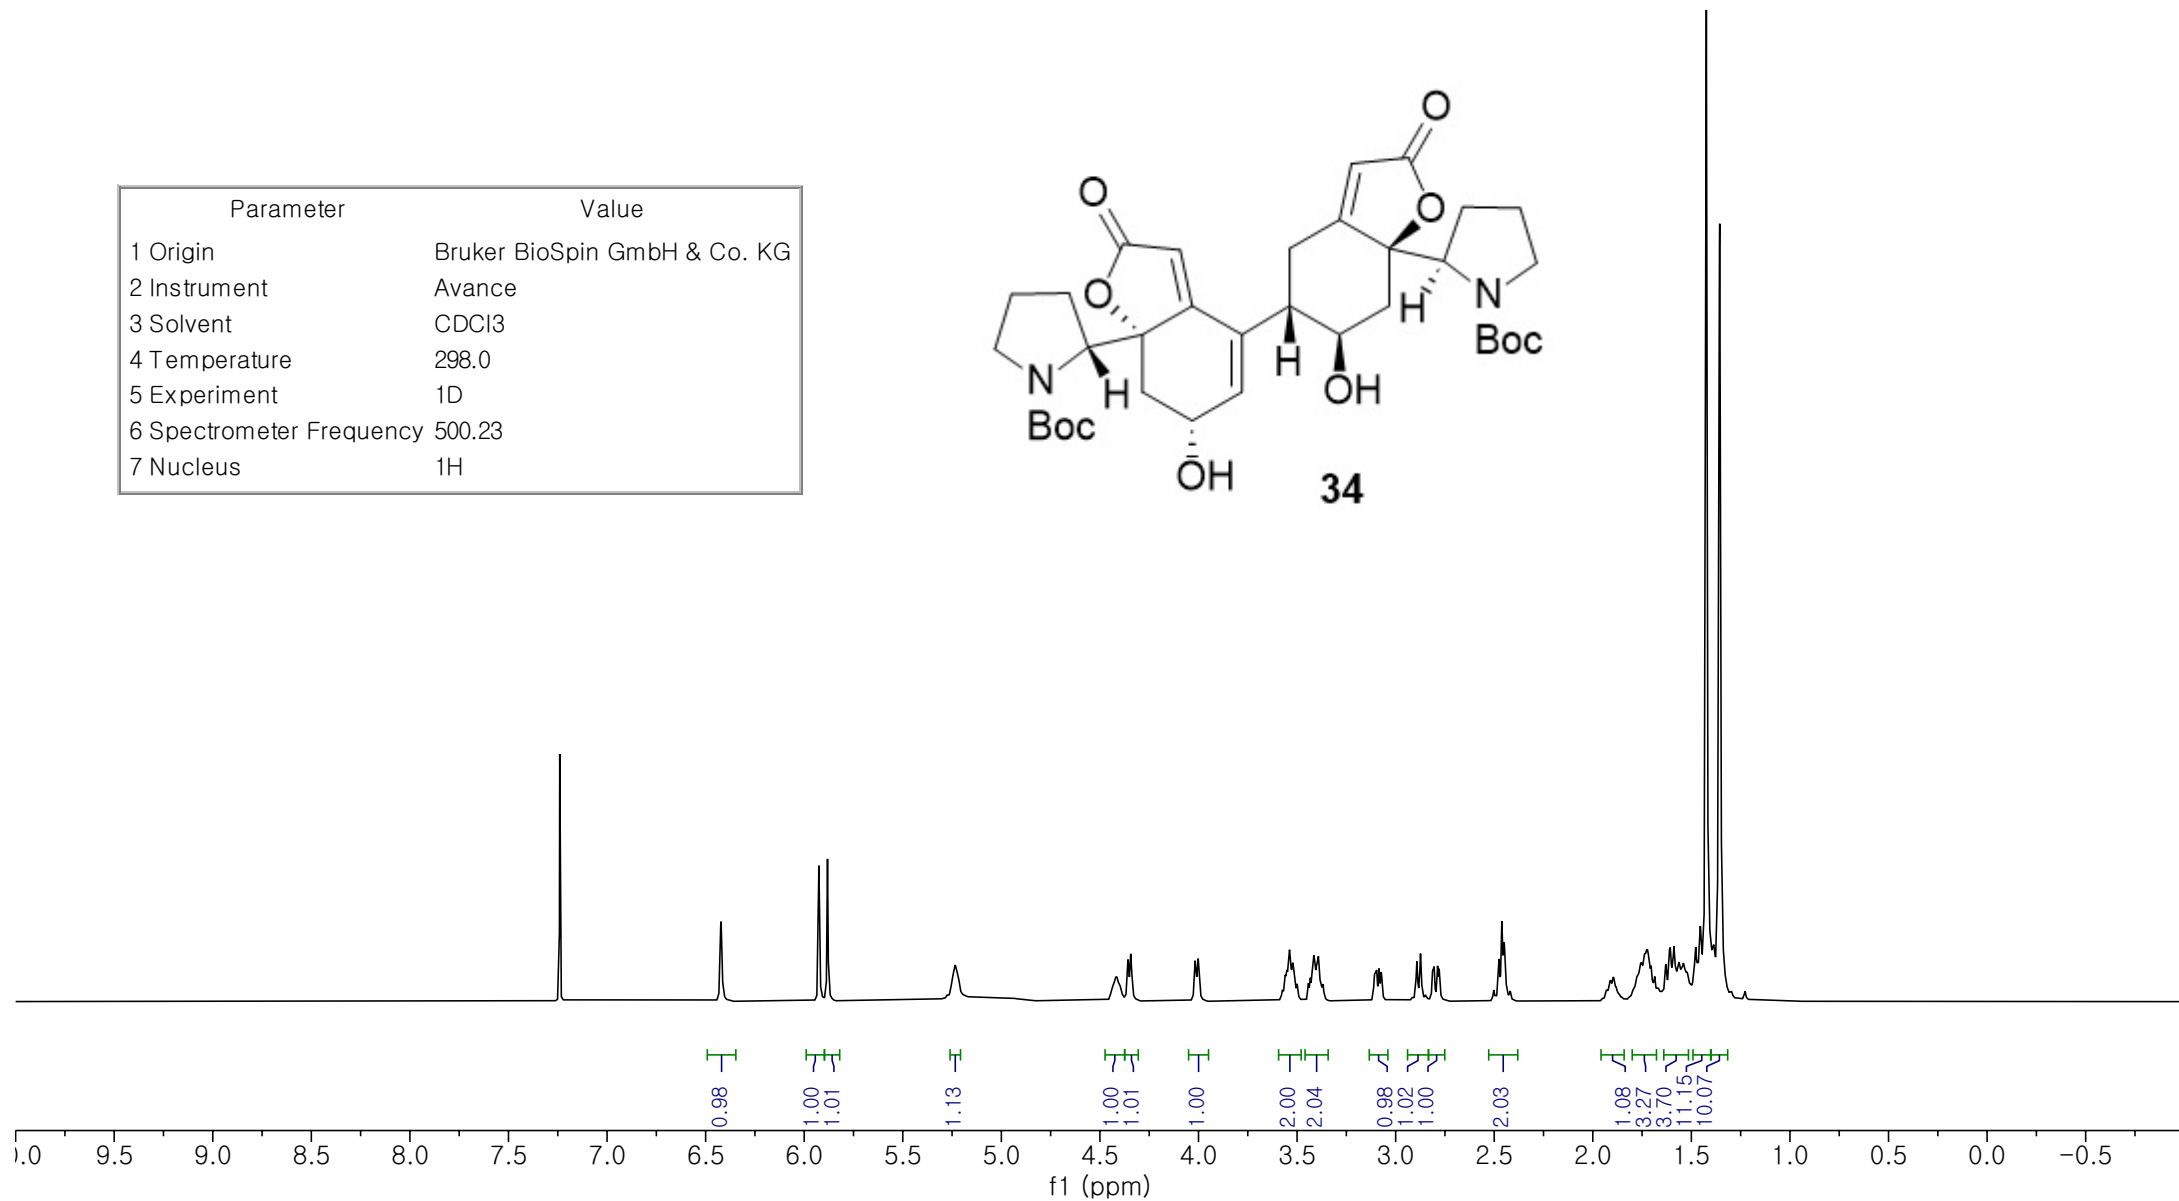

172.2  
172.1  
171.1  
168.1

157.3  
156.2

135.9  
135.6

115.7  
111.5

91.0  
90.5

81.3  
80.7  
77.5 CDCI3  
77.2 CDCI3  
77.0 CDCI3

71.0  
66.2

58.7  
58.2

48.8  
47.8  
47.6  
44.7  
42.1

30.7  
28.6  
28.5  
26.5  
25.0  
24.7  
24.3

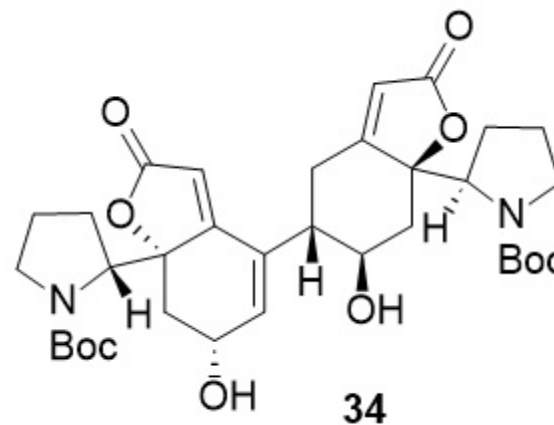

| Parameter                | Value                        |
|--------------------------|------------------------------|
| 1 Origin                 | Bruker BioSpin GmbH & Co. KG |
| 2 Instrument             | Avance                       |
| 3 Solvent                | CDCl <sub>3</sub>            |
| 4 Temperature            | 298.3                        |
| 5 Experiment             | 1D                           |
| 6 Spectrometer Frequency | 125.80                       |
| 7 Nucleus                | <sup>13</sup> C              |

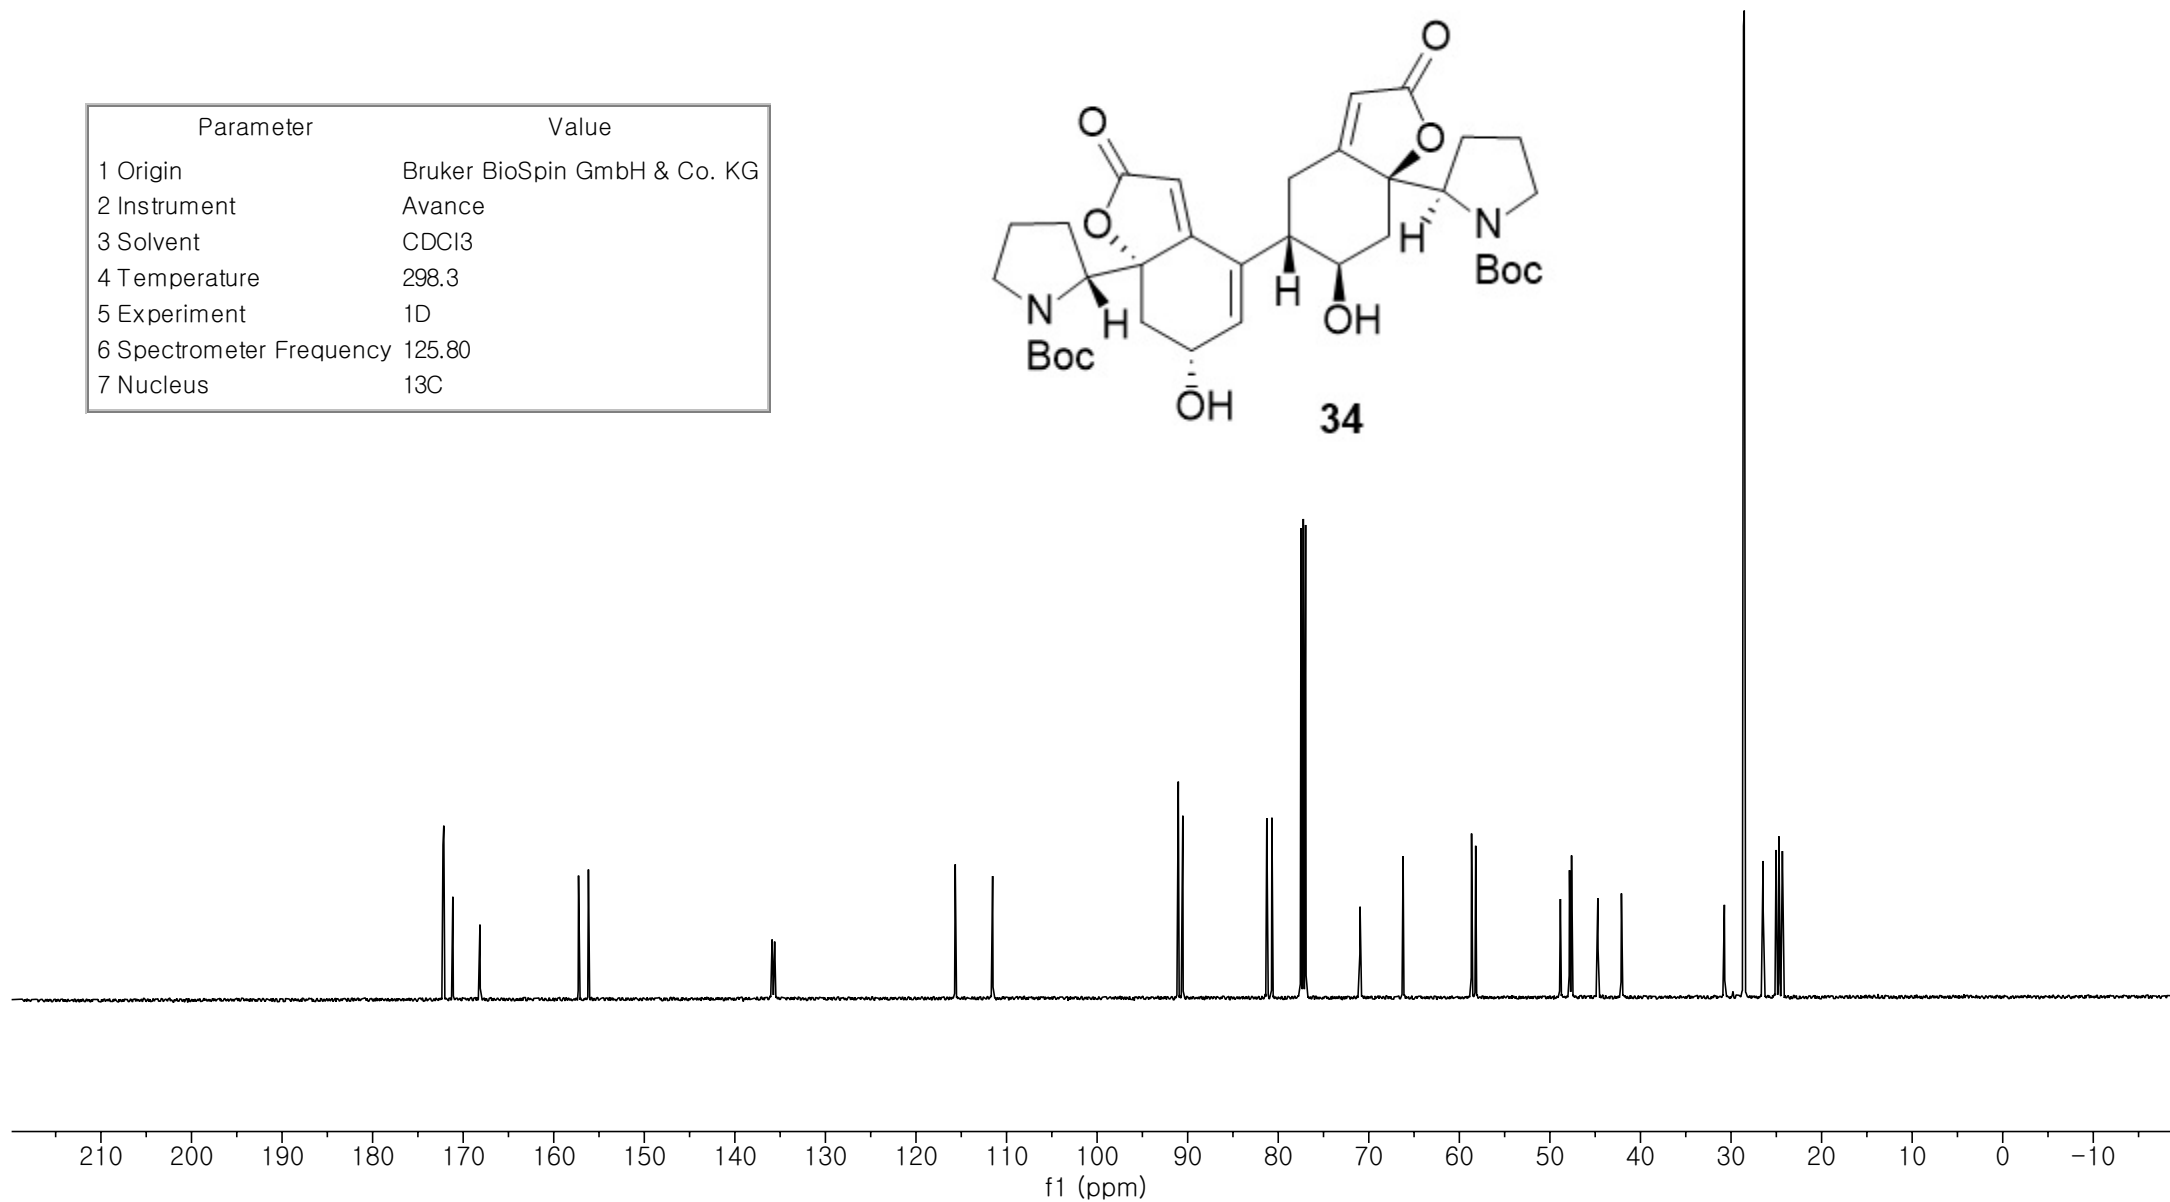

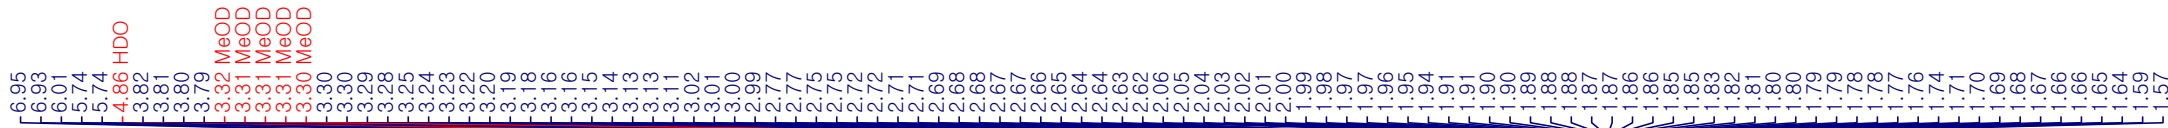

| Parameter                | Value                        |
|--------------------------|------------------------------|
| 1 Origin                 | Bruker BioSpin GmbH & Co. KG |
| 2 Instrument             | Avance                       |
| 3 Solvent                | MeOD                         |
| 4 Temperature            | 298.0                        |
| 5 Experiment             | 1D                           |
| 6 Spectrometer Frequency | 500.23                       |
| 7 Nucleus                | <sup>1</sup> H               |

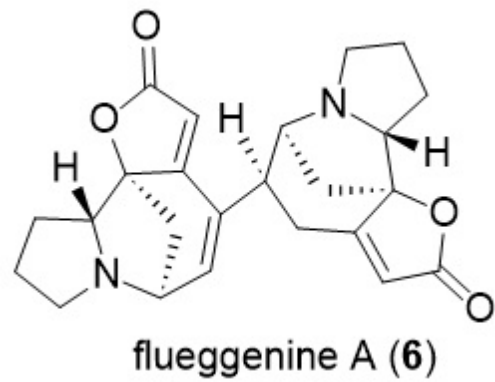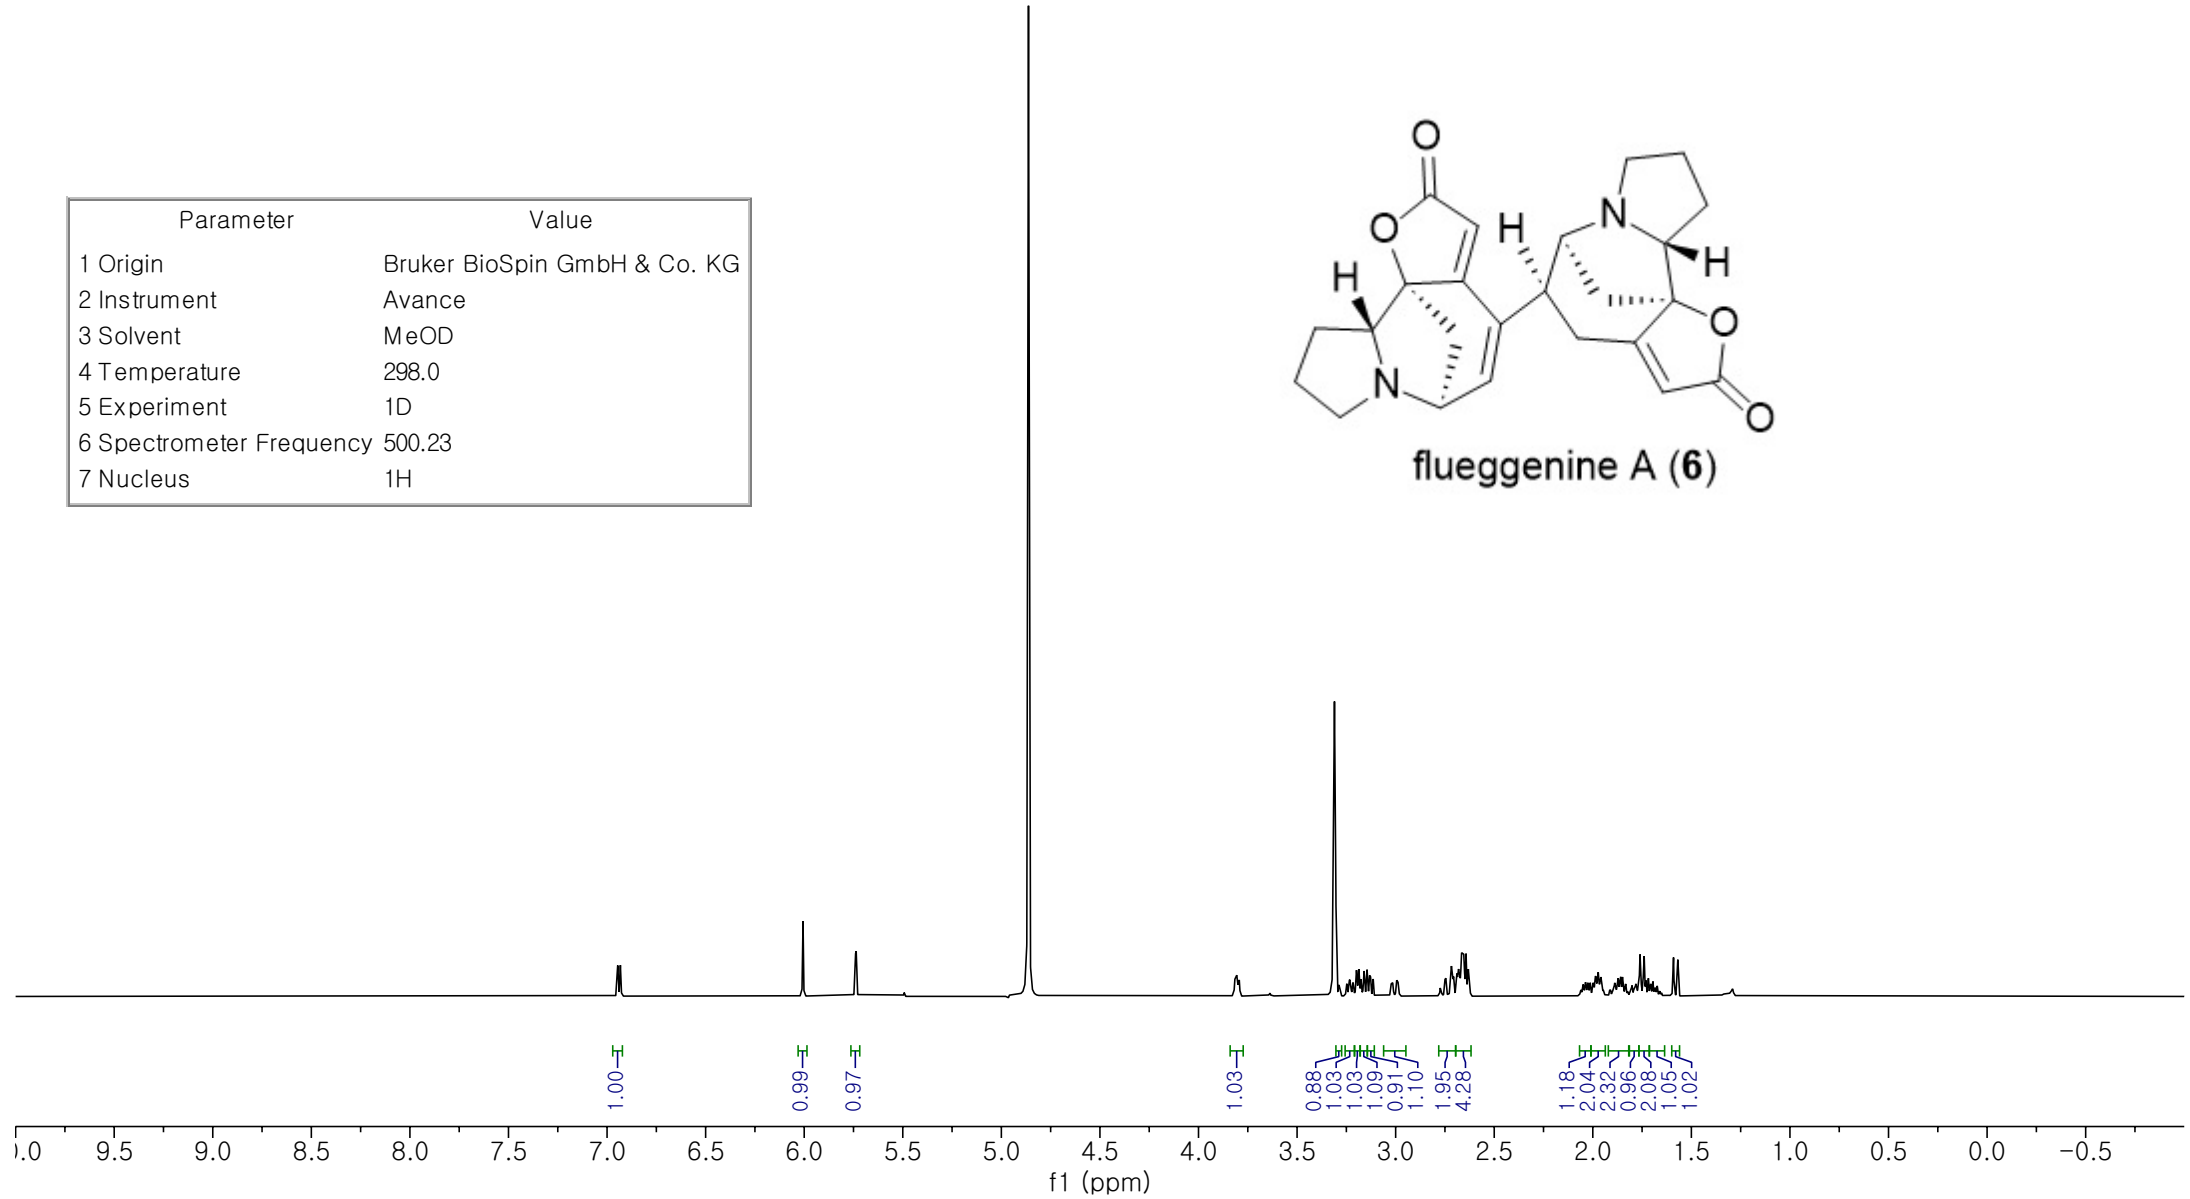

176.3  
175.4  
174.7  
171.8

140.6  
135.8

110.8  
108.2

94.0  
93.5

68.4  
66.4  
66.1  
60.7  
58.3  
56.1  
49.7 MeOD  
49.5 MeOD  
49.3 MeOD  
49.2 MeOD  
48.8 MeOD  
48.6 MeOD  
44.1

37.0  
36.5  
30.3  
30.2  
29.2  
27.8  
27.8

| Parameter                | Value               |
|--------------------------|---------------------|
| 1 Origin                 | Bruker BioSpin GmbH |
| 2 Instrument             | Avance              |
| 3 Solvent                | MeOD                |
| 4 Temperature            | 298.2               |
| 5 Experiment             | 1D                  |
| 6 Spectrometer Frequency | 125.80              |
| 7 Nucleus                | <sup>13</sup> C     |

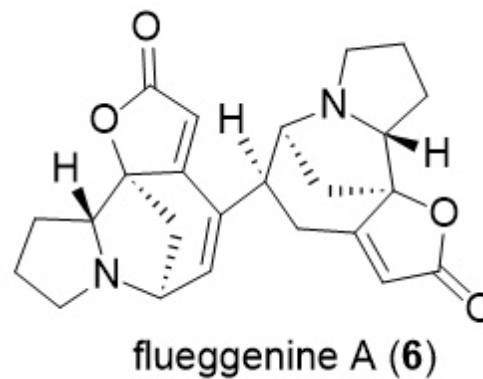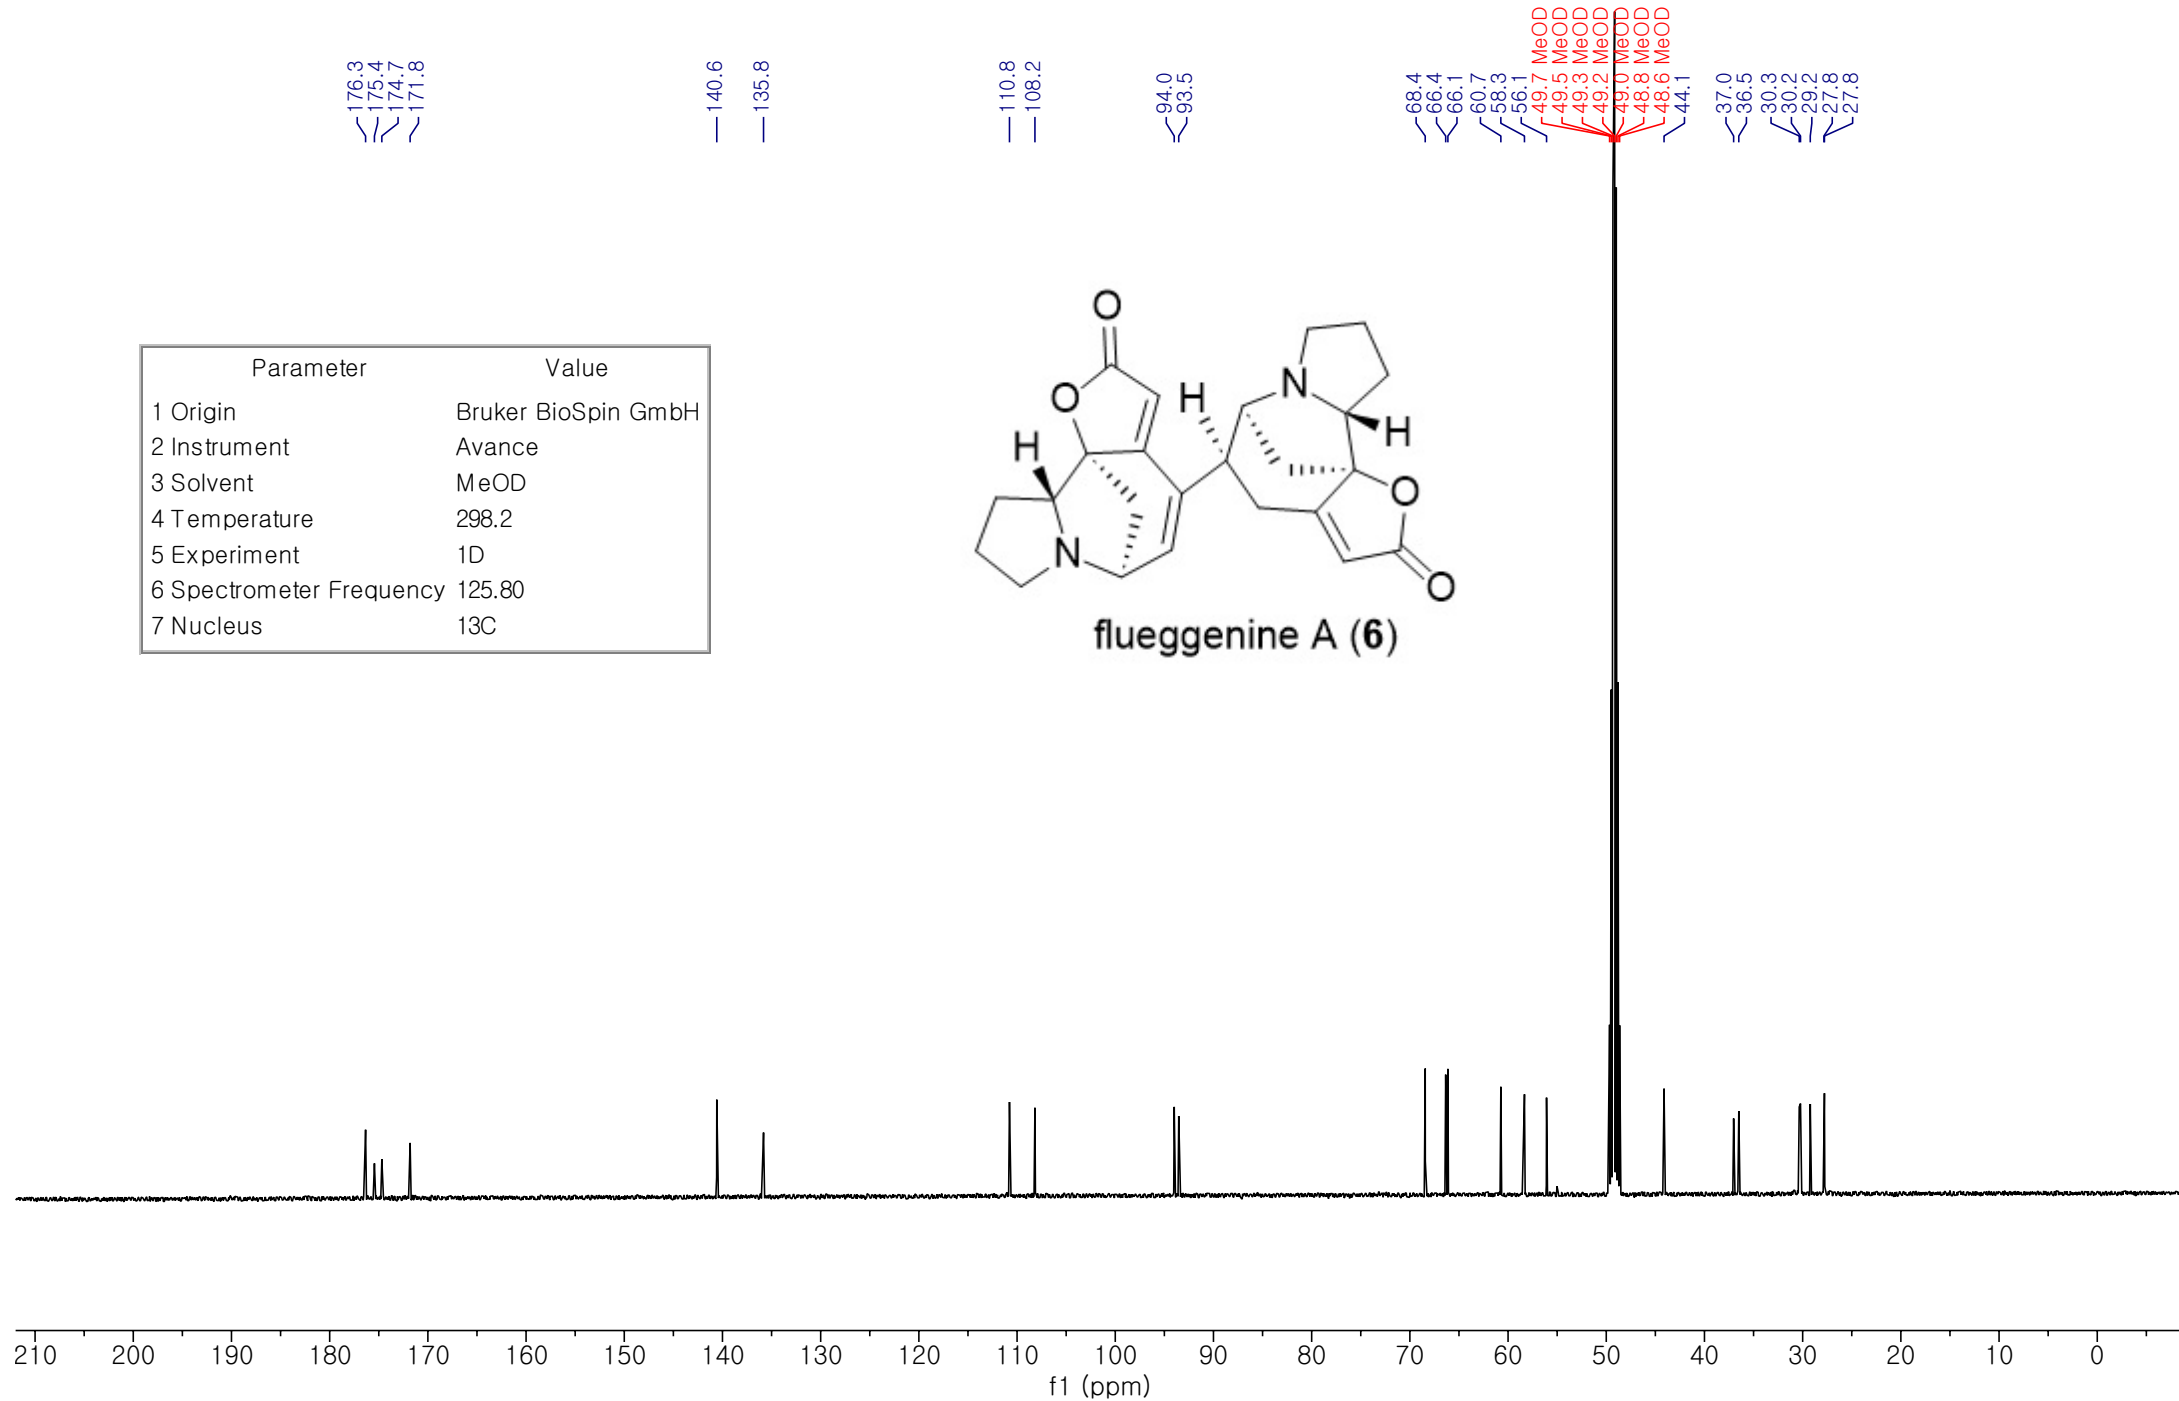

— 7.24 CDCl<sub>3</sub>

— 6.60

6.08

5.86

5.78

4.43

4.41

4.02

4.00

3.57

3.37

3.36

3.35

3.35

3.34

3.33

3.32

3.31

3.30

2.91

2.90

2.88

2.80

2.77

2.74

1.98

1.94

1.79

1.78

1.77

1.76

1.75

1.73

1.70

1.69

1.68

1.67

1.66

1.65

1.59

1.59

1.57

1.55

1.54

1.54

1.47

1.45

1.41

1.39

| Parameter                | Value                        |
|--------------------------|------------------------------|
| 1 Origin                 | Bruker BioSpin GmbH & Co. KG |
| 2 Instrument             | Avance                       |
| 3 Solvent                | CDCl <sub>3</sub>            |
| 4 Temperature            | 298.0                        |
| 5 Experiment             | 1D                           |
| 6 Spectrometer Frequency | 500.23                       |
| 7 Nucleus                | <sup>1</sup> H               |

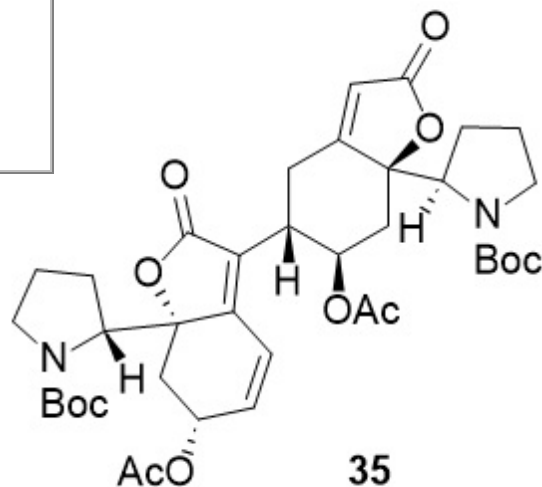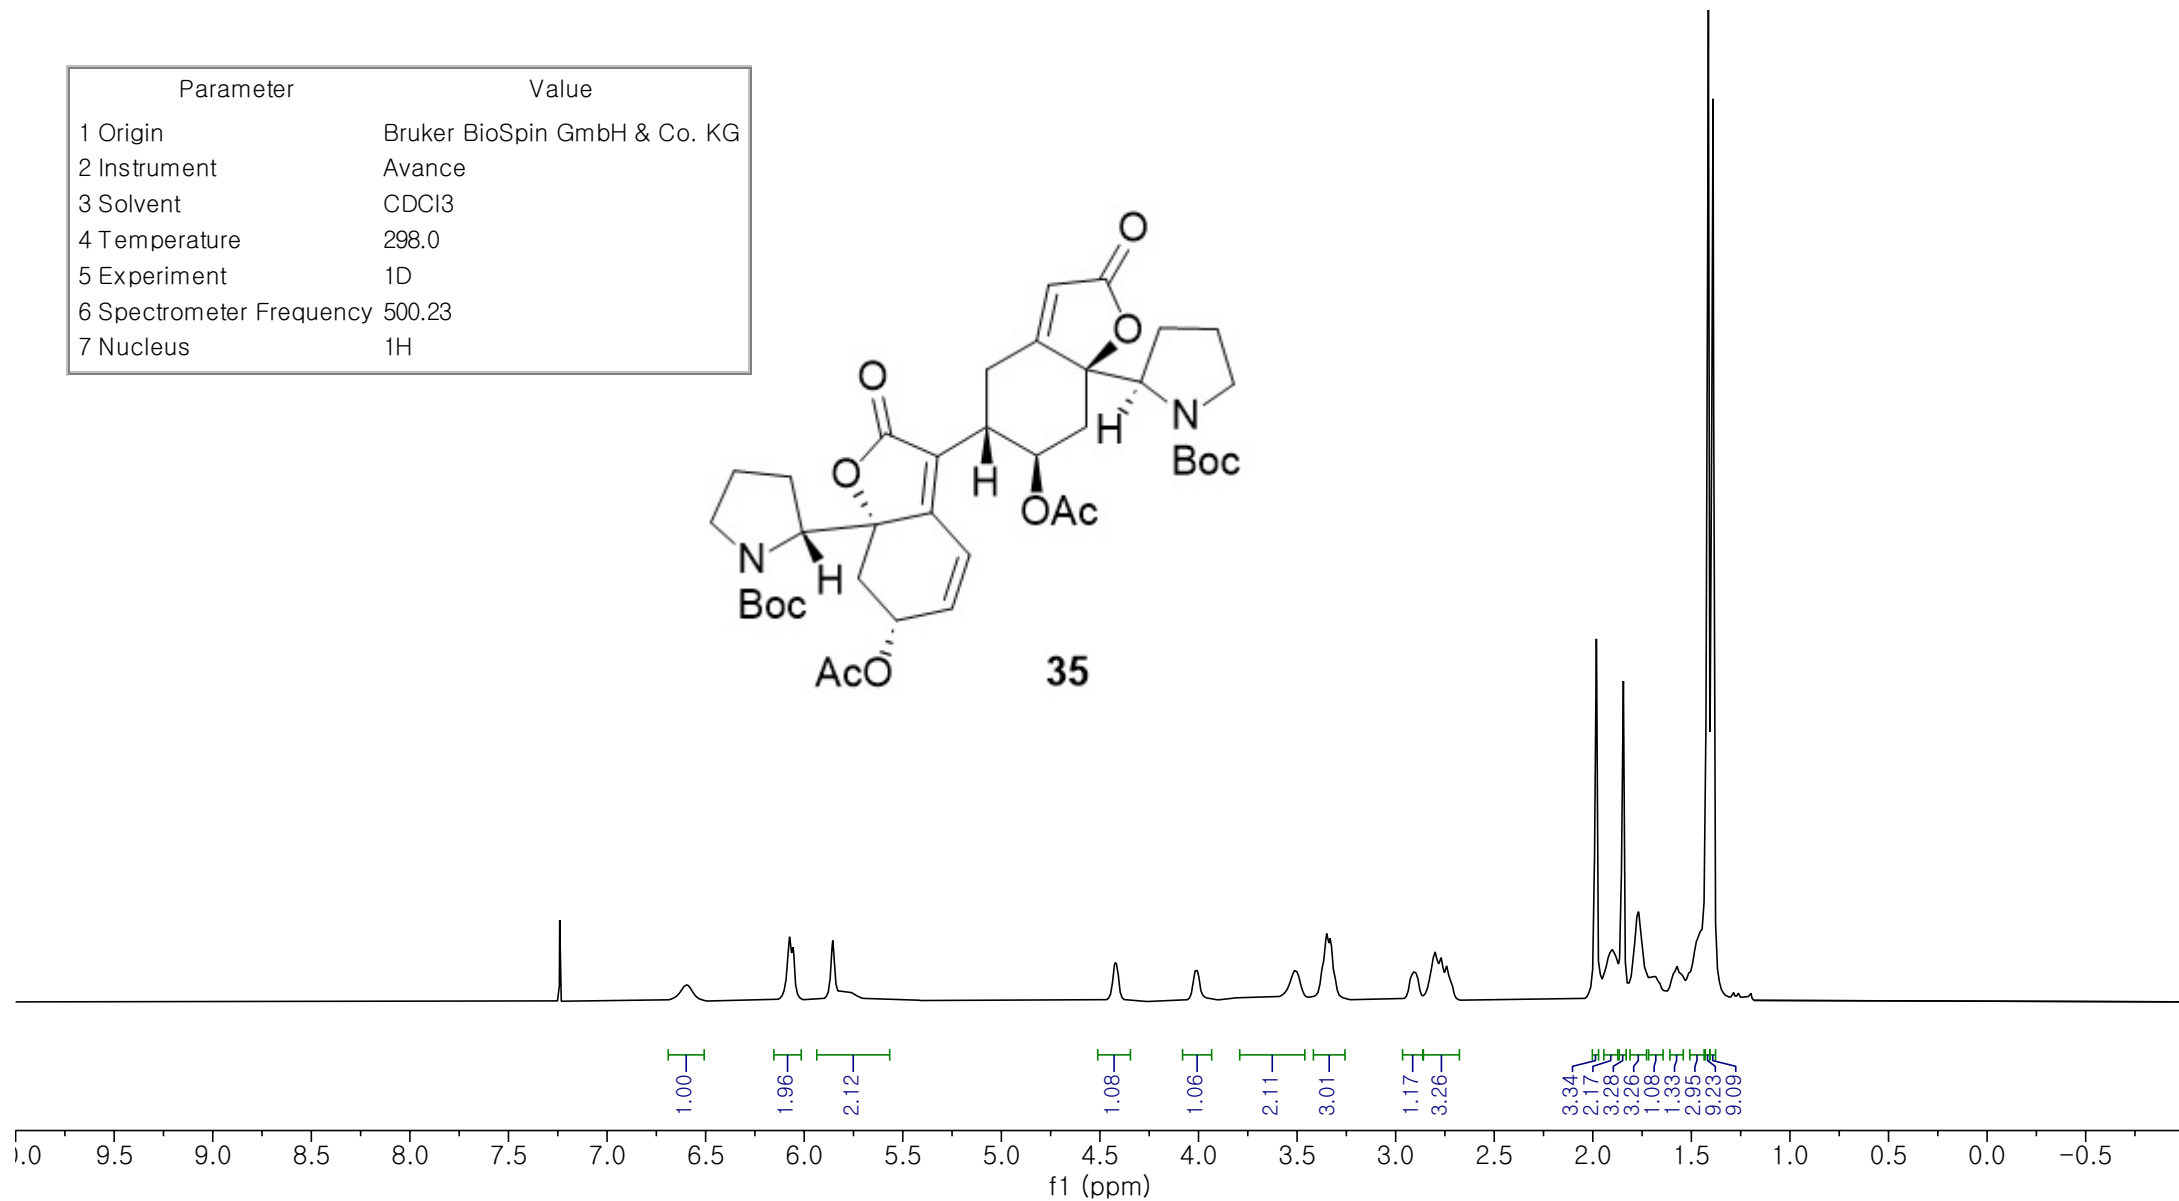

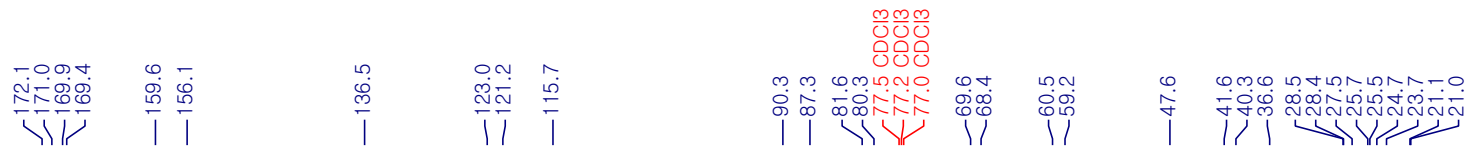

| Parameter                | Value                        |
|--------------------------|------------------------------|
| 1 Origin                 | Bruker BioSpin GmbH & Co. KG |
| 2 Instrument             | Avance                       |
| 3 Solvent                | CDCl3                        |
| 4 Temperature            | 298.2                        |
| 5 Experiment             | 1D                           |
| 6 Spectrometer Frequency | 125.80                       |
| 7 Nucleus                | 13C                          |

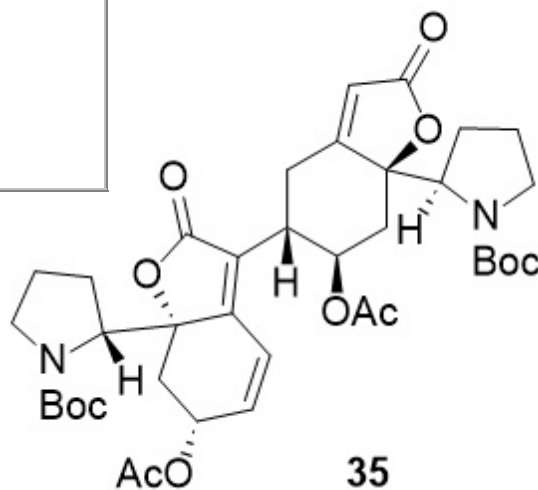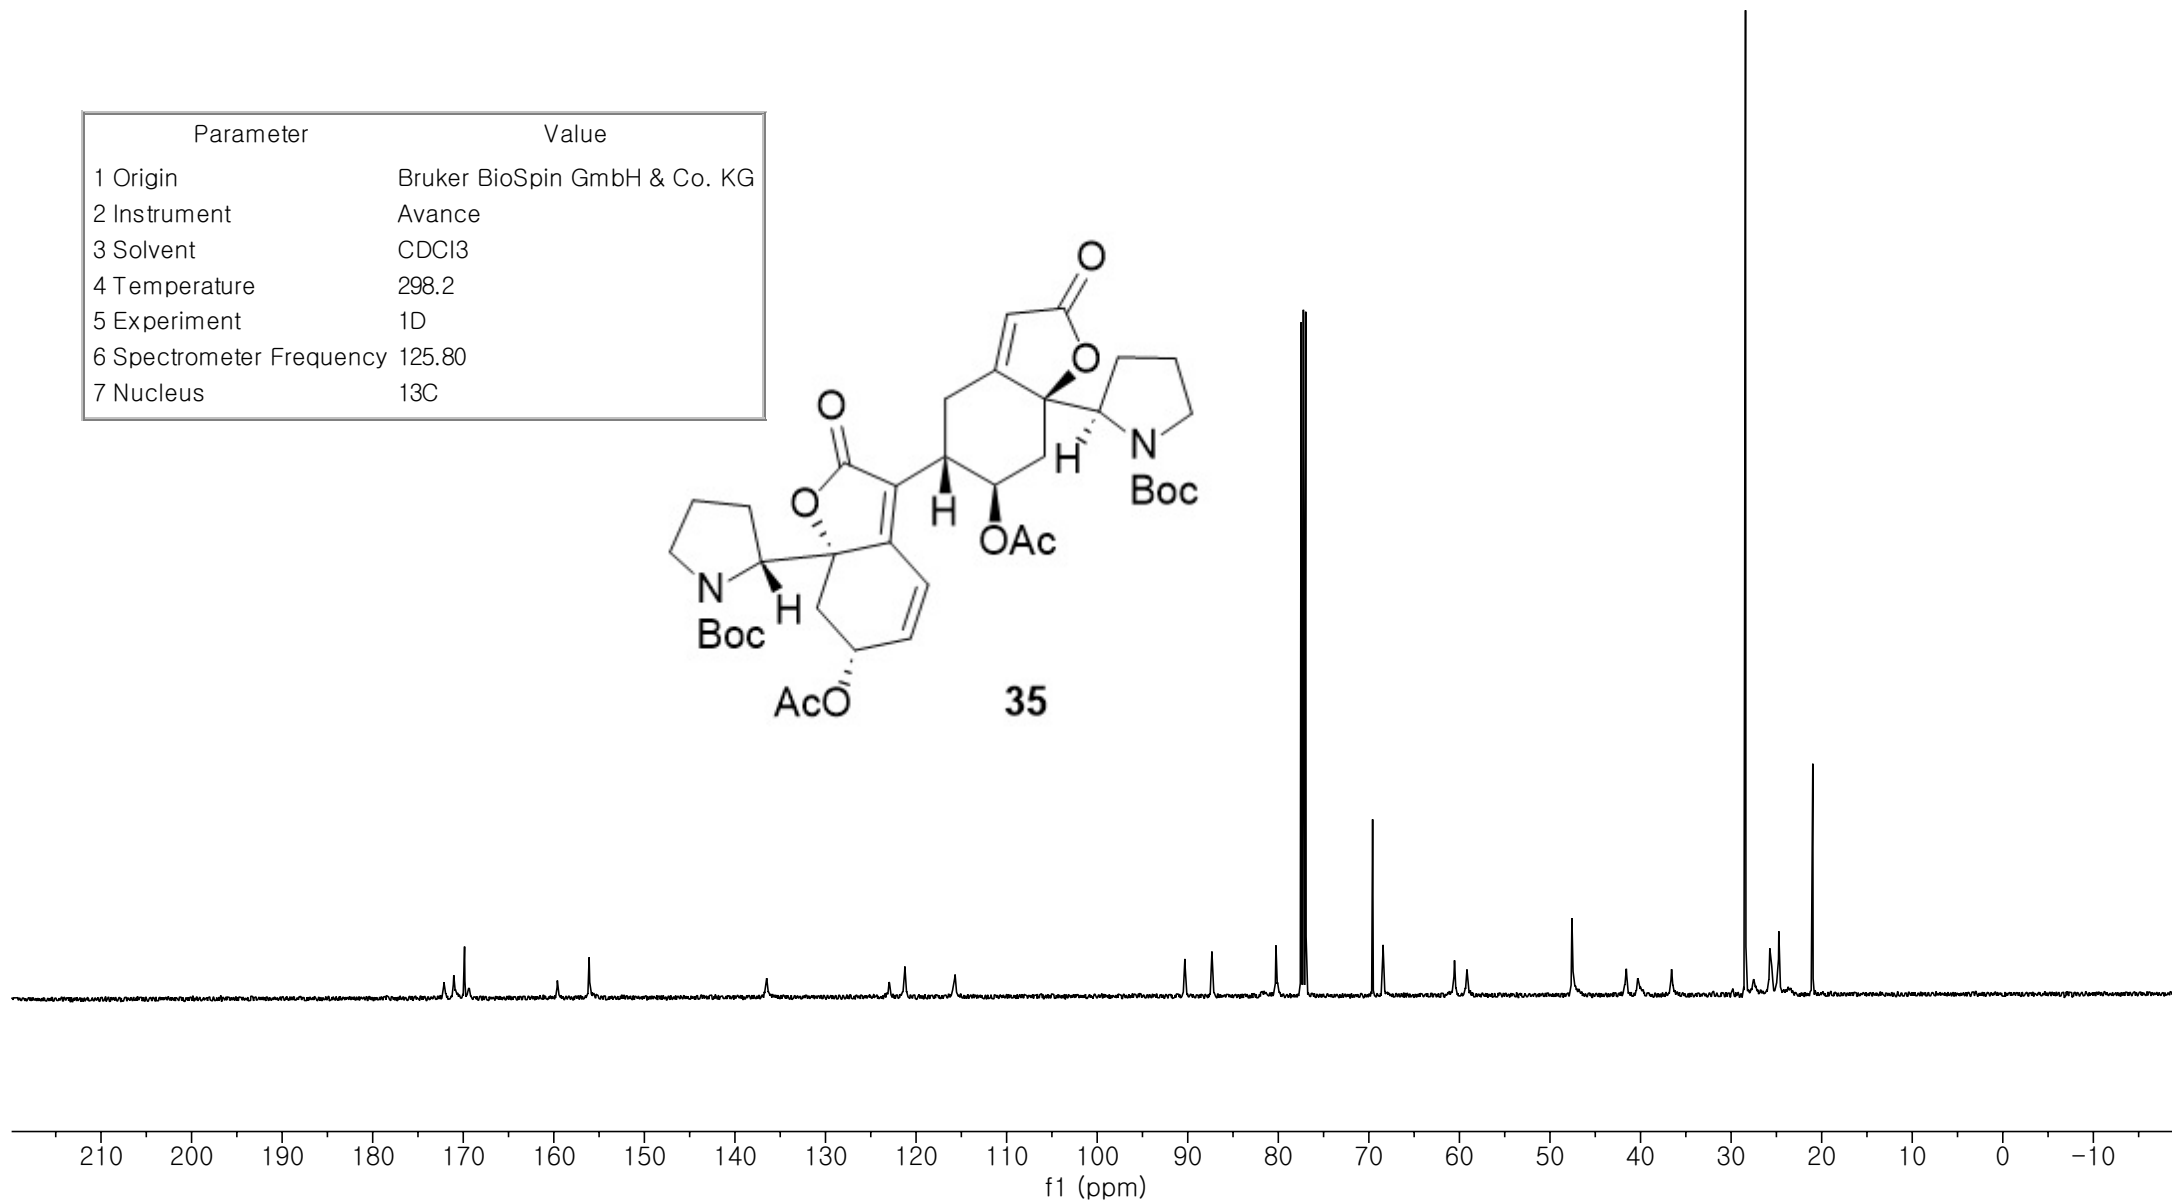

$^{13}\text{C}$  NMR (126 MHz) spectrum of **35** in  $\text{CDCl}_3$  at 298 K

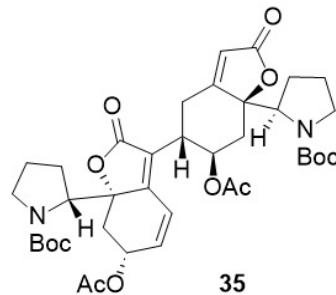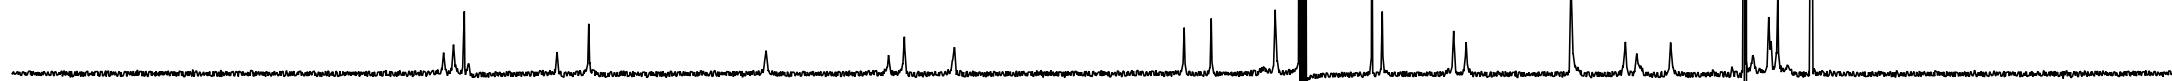

$^{13}\text{C}$  NMR (126 MHz) spectrum of **35** in  $\text{CDCl}_3$  at 273 K

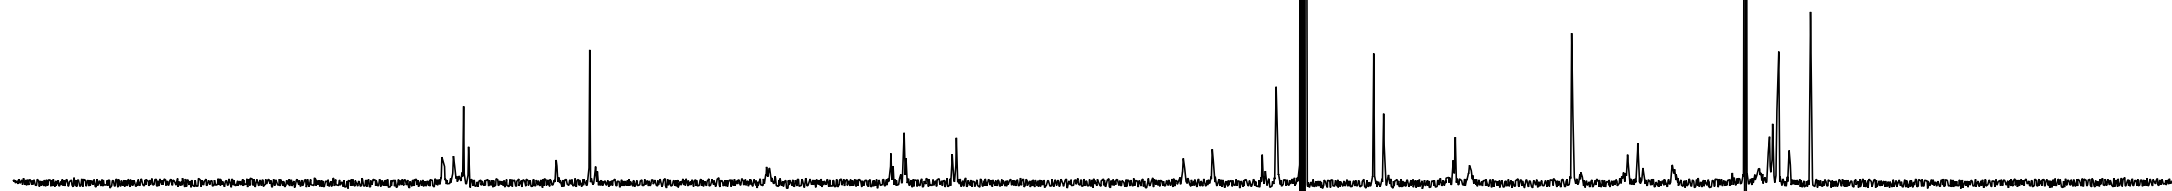

$^{13}\text{C}$  NMR (126 MHz) spectrum of **35** in  $\text{CDCl}_3$  at 253 K

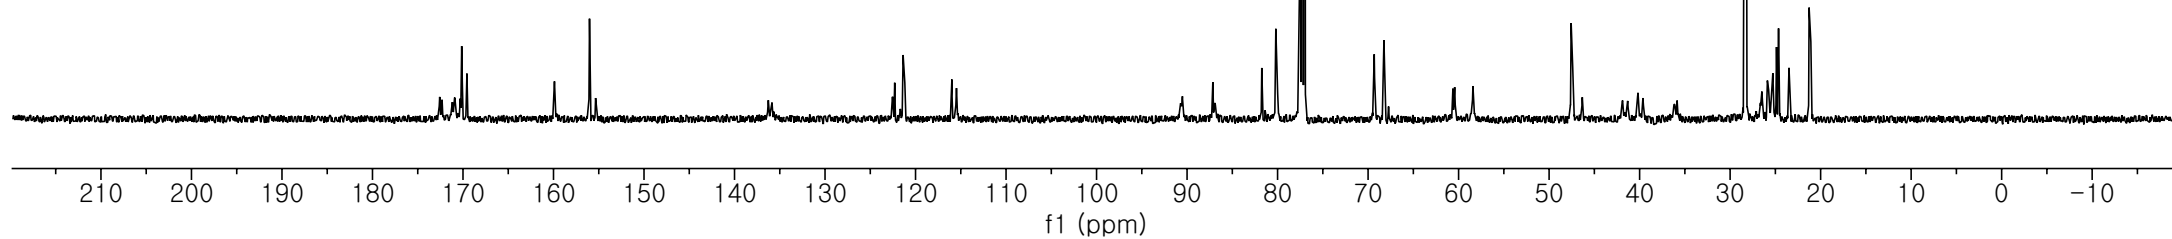

— 7.24 CDCl<sub>3</sub>

6.54  
6.52

6.18  
6.16

5.81

5.14

4.63  
4.42  
4.41

3.98  
3.96

3.56  
3.53  
3.51

3.36  
2.99  
2.97

2.94  
2.94  
2.86  
2.74

2.69  
2.68  
2.58

1.90  
1.88  
1.86  
1.82

1.78  
1.77  
1.76  
1.75

1.74  
1.73  
1.72  
1.71

1.70  
1.68  
1.68  
1.66

1.65  
1.64  
1.56  
1.52

1.50  
1.44  
1.43  
1.35  
1.32  
1.31  
1.30

| Parameter                | Value                        |
|--------------------------|------------------------------|
| 1 Origin                 | Bruker BioSpin GmbH & Co. KG |
| 2 Instrument             | Avance                       |
| 3 Solvent                | CDCl <sub>3</sub>            |
| 4 Temperature            | 298.0                        |
| 5 Experiment             | 1D                           |
| 6 Spectrometer Frequency | 500.23                       |
| 7 Nucleus                | <sup>1</sup> H               |

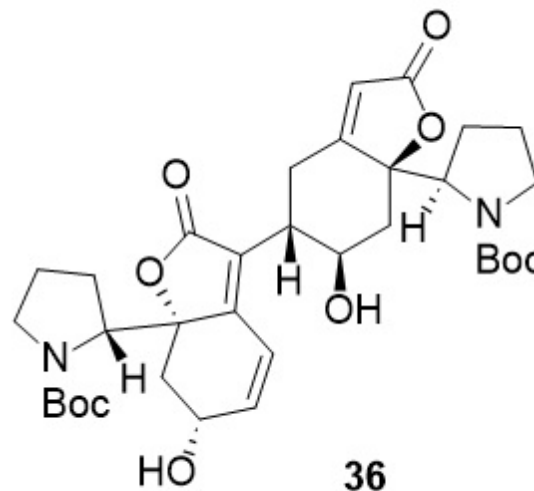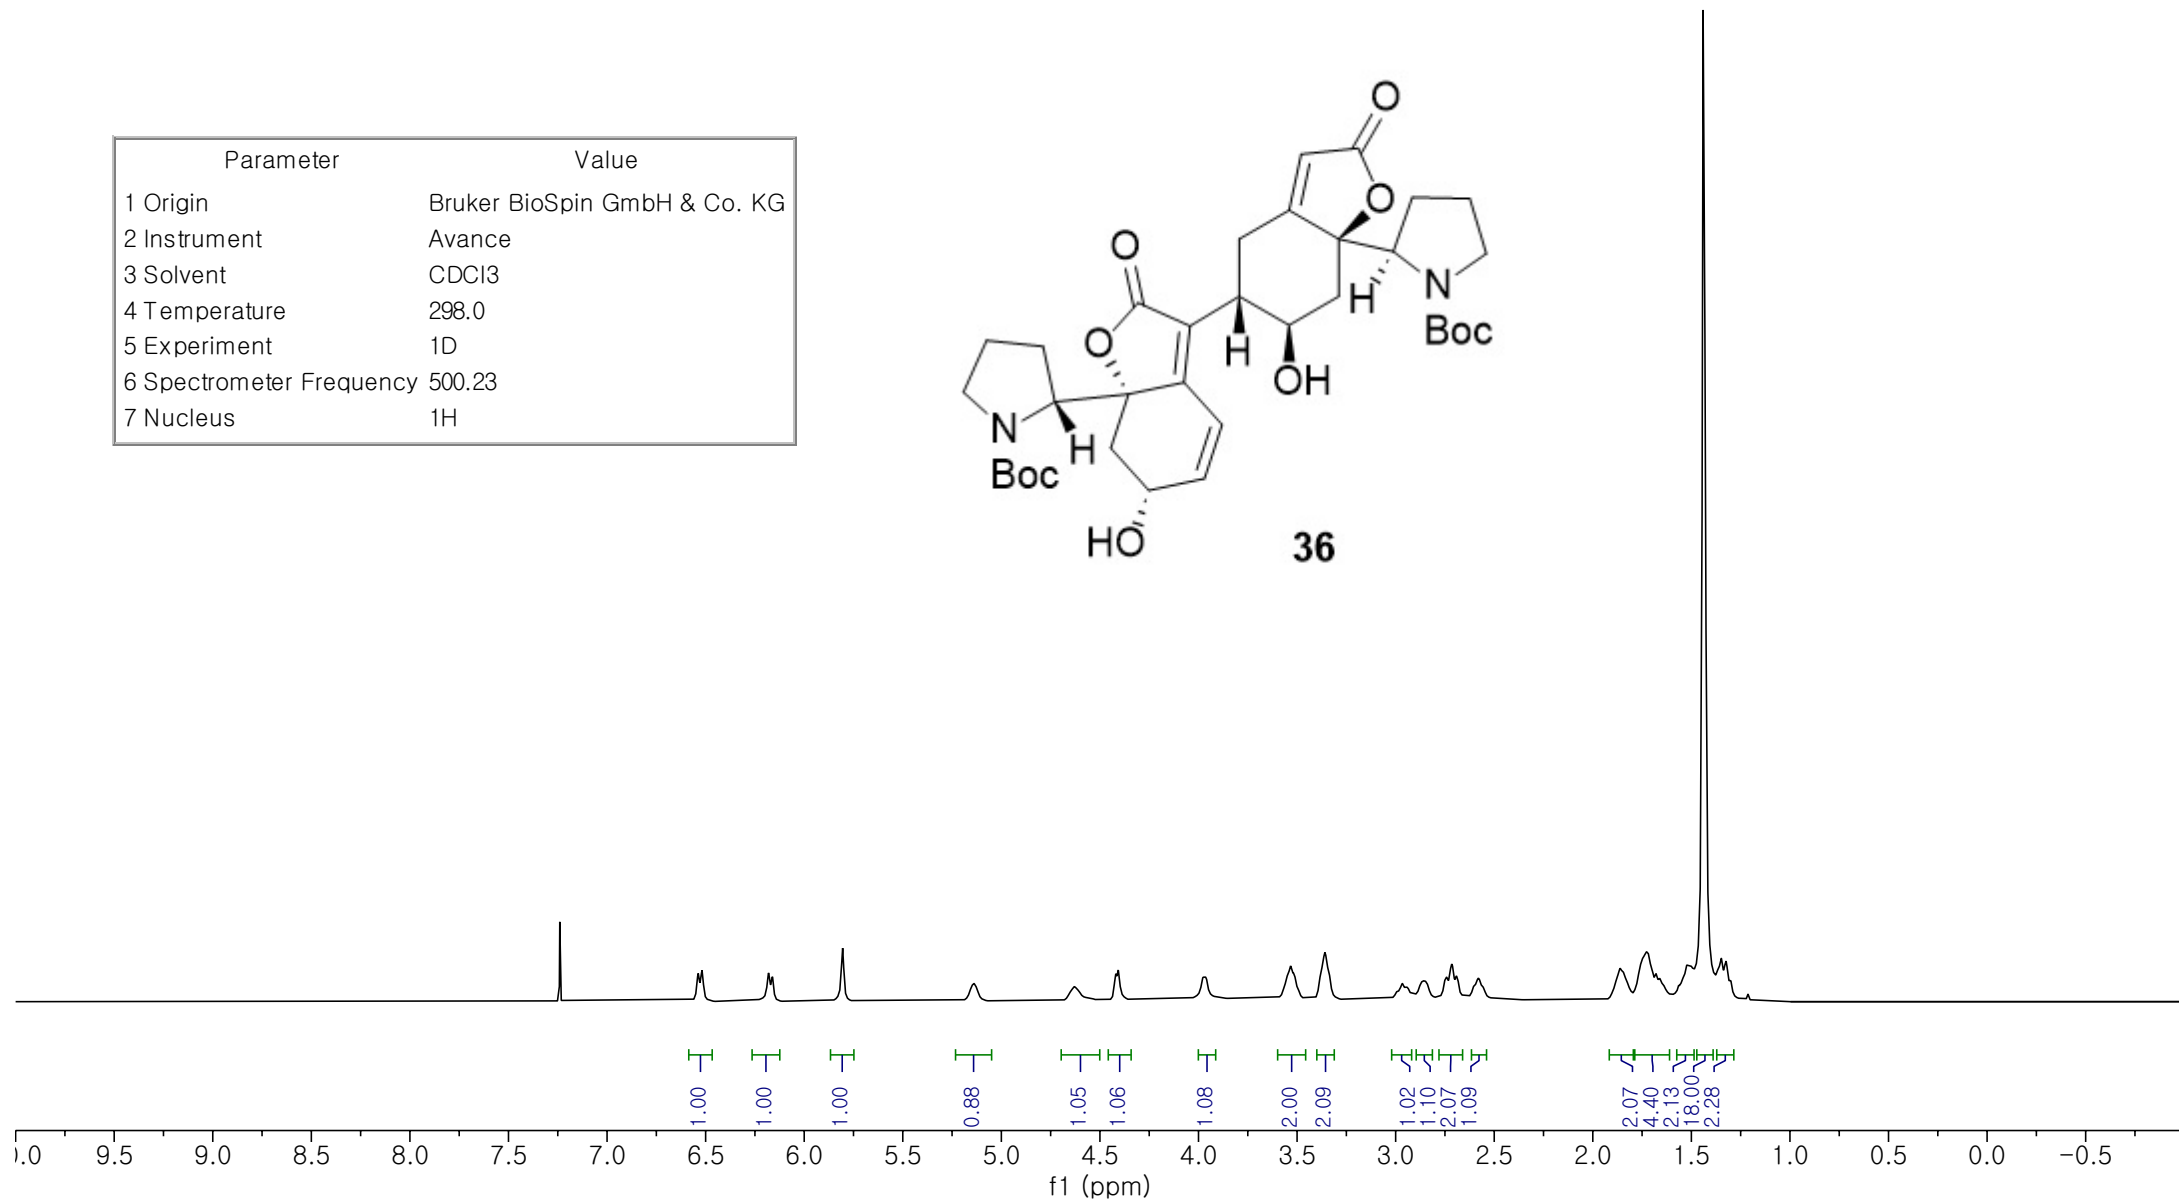



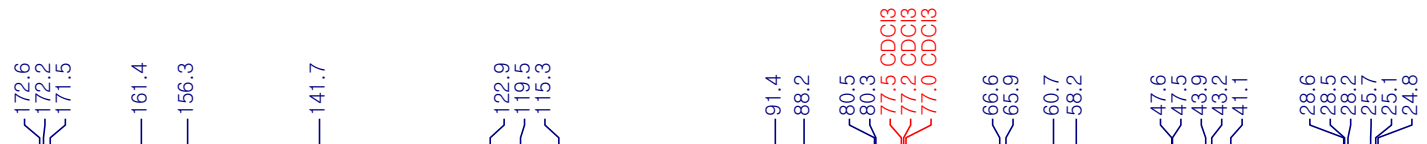

| Parameter                | Value                        |
|--------------------------|------------------------------|
| 1 Origin                 | Bruker BioSpin GmbH & Co. KG |
| 2 Instrument             | Avance                       |
| 3 Solvent                | CDCl3                        |
| 4 Temperature            | 298.5                        |
| 5 Experiment             | 1D                           |
| 6 Spectrometer Frequency | 125.80                       |
| 7 Nucleus                | 13C                          |

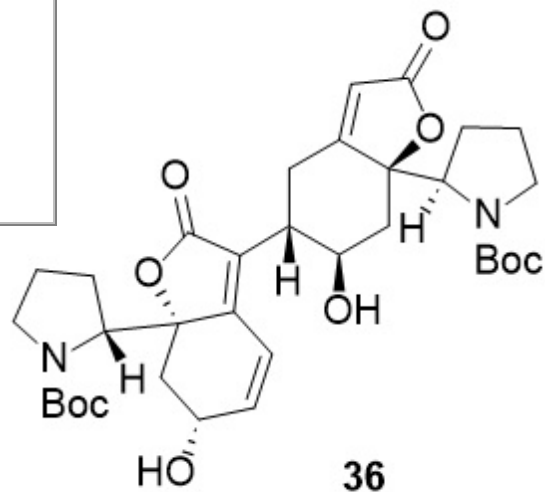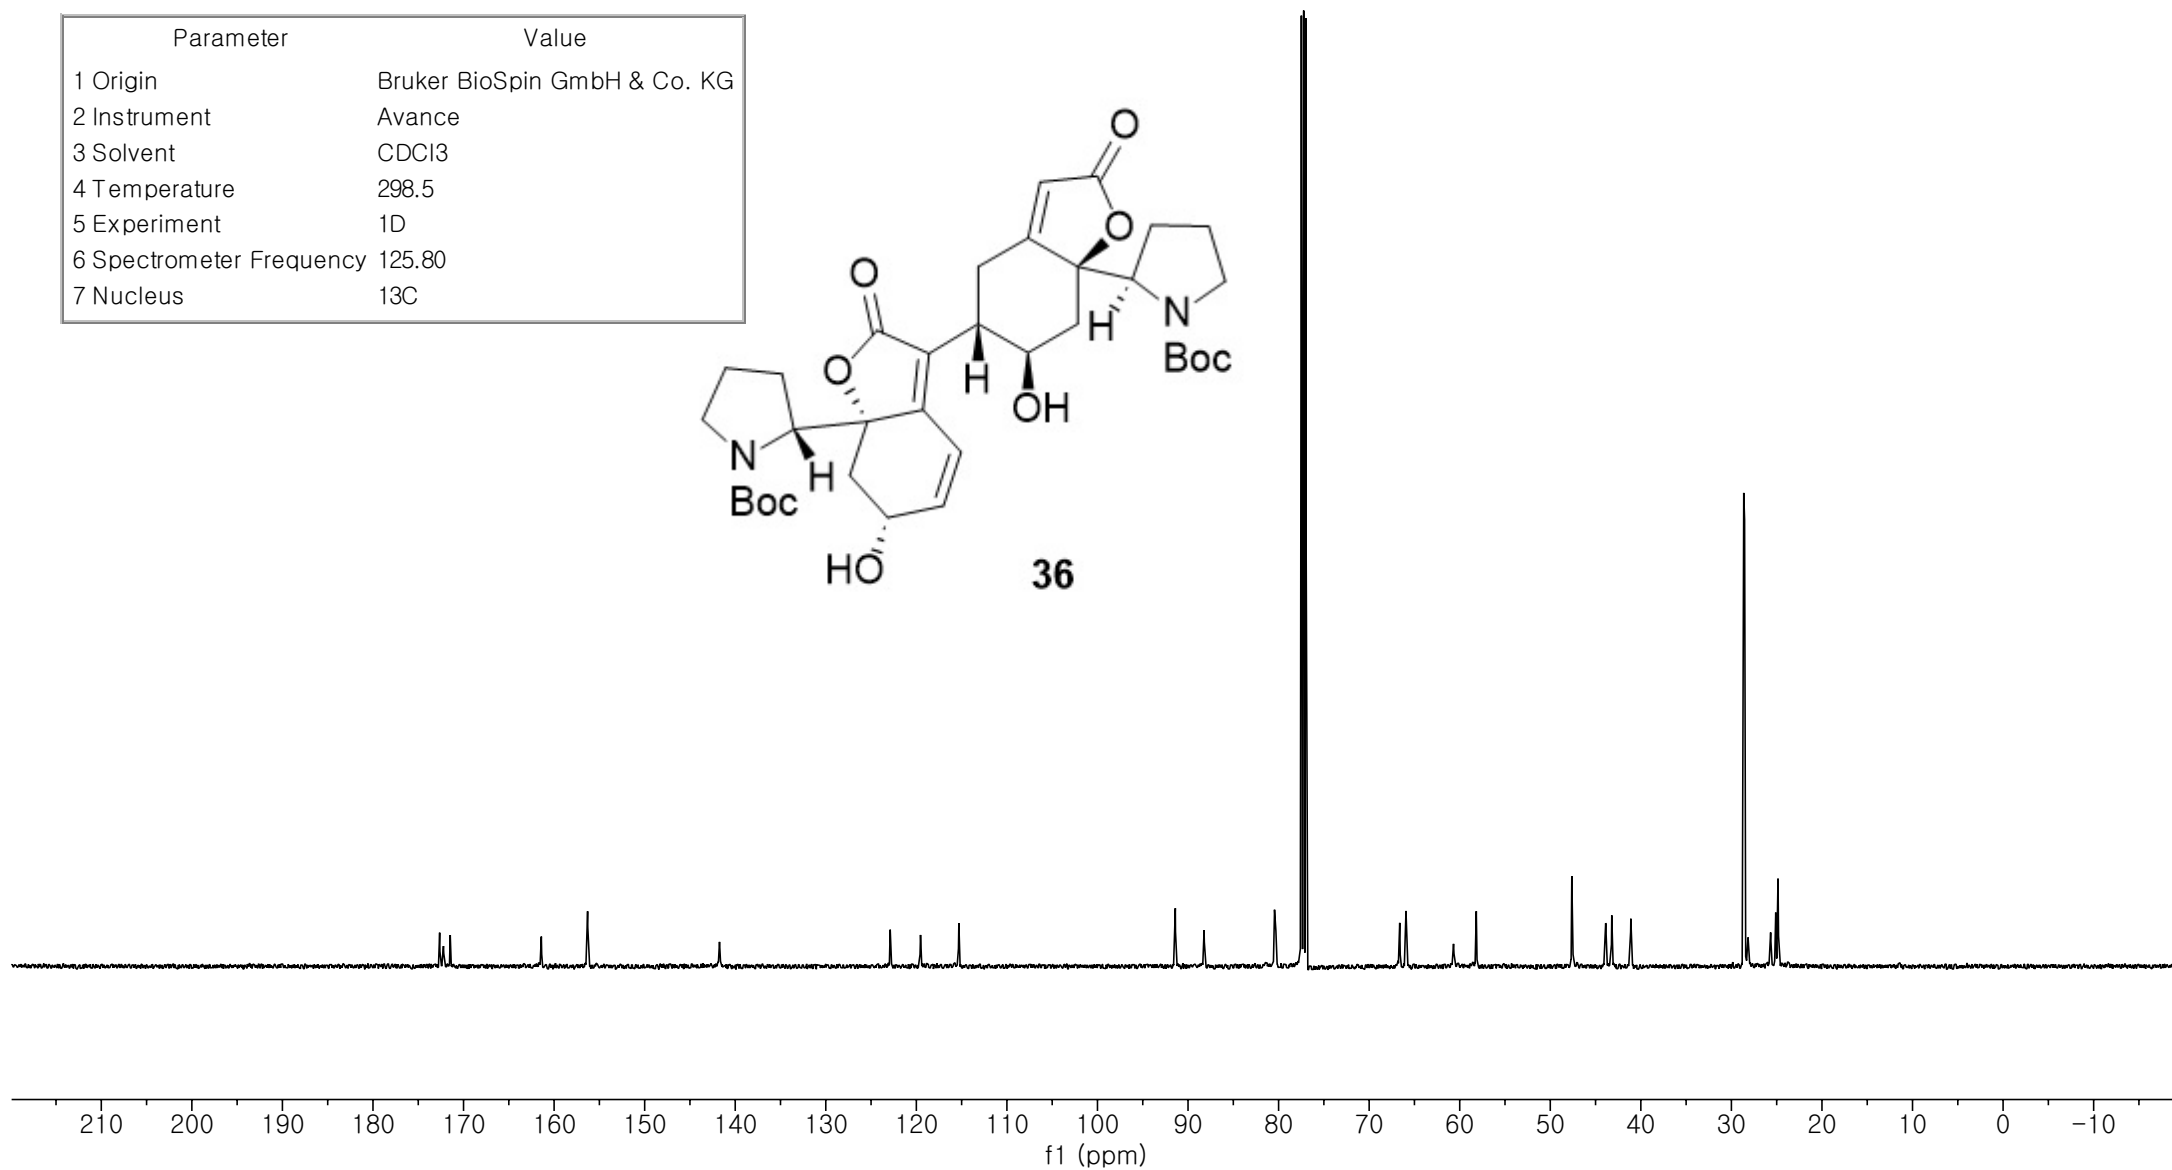

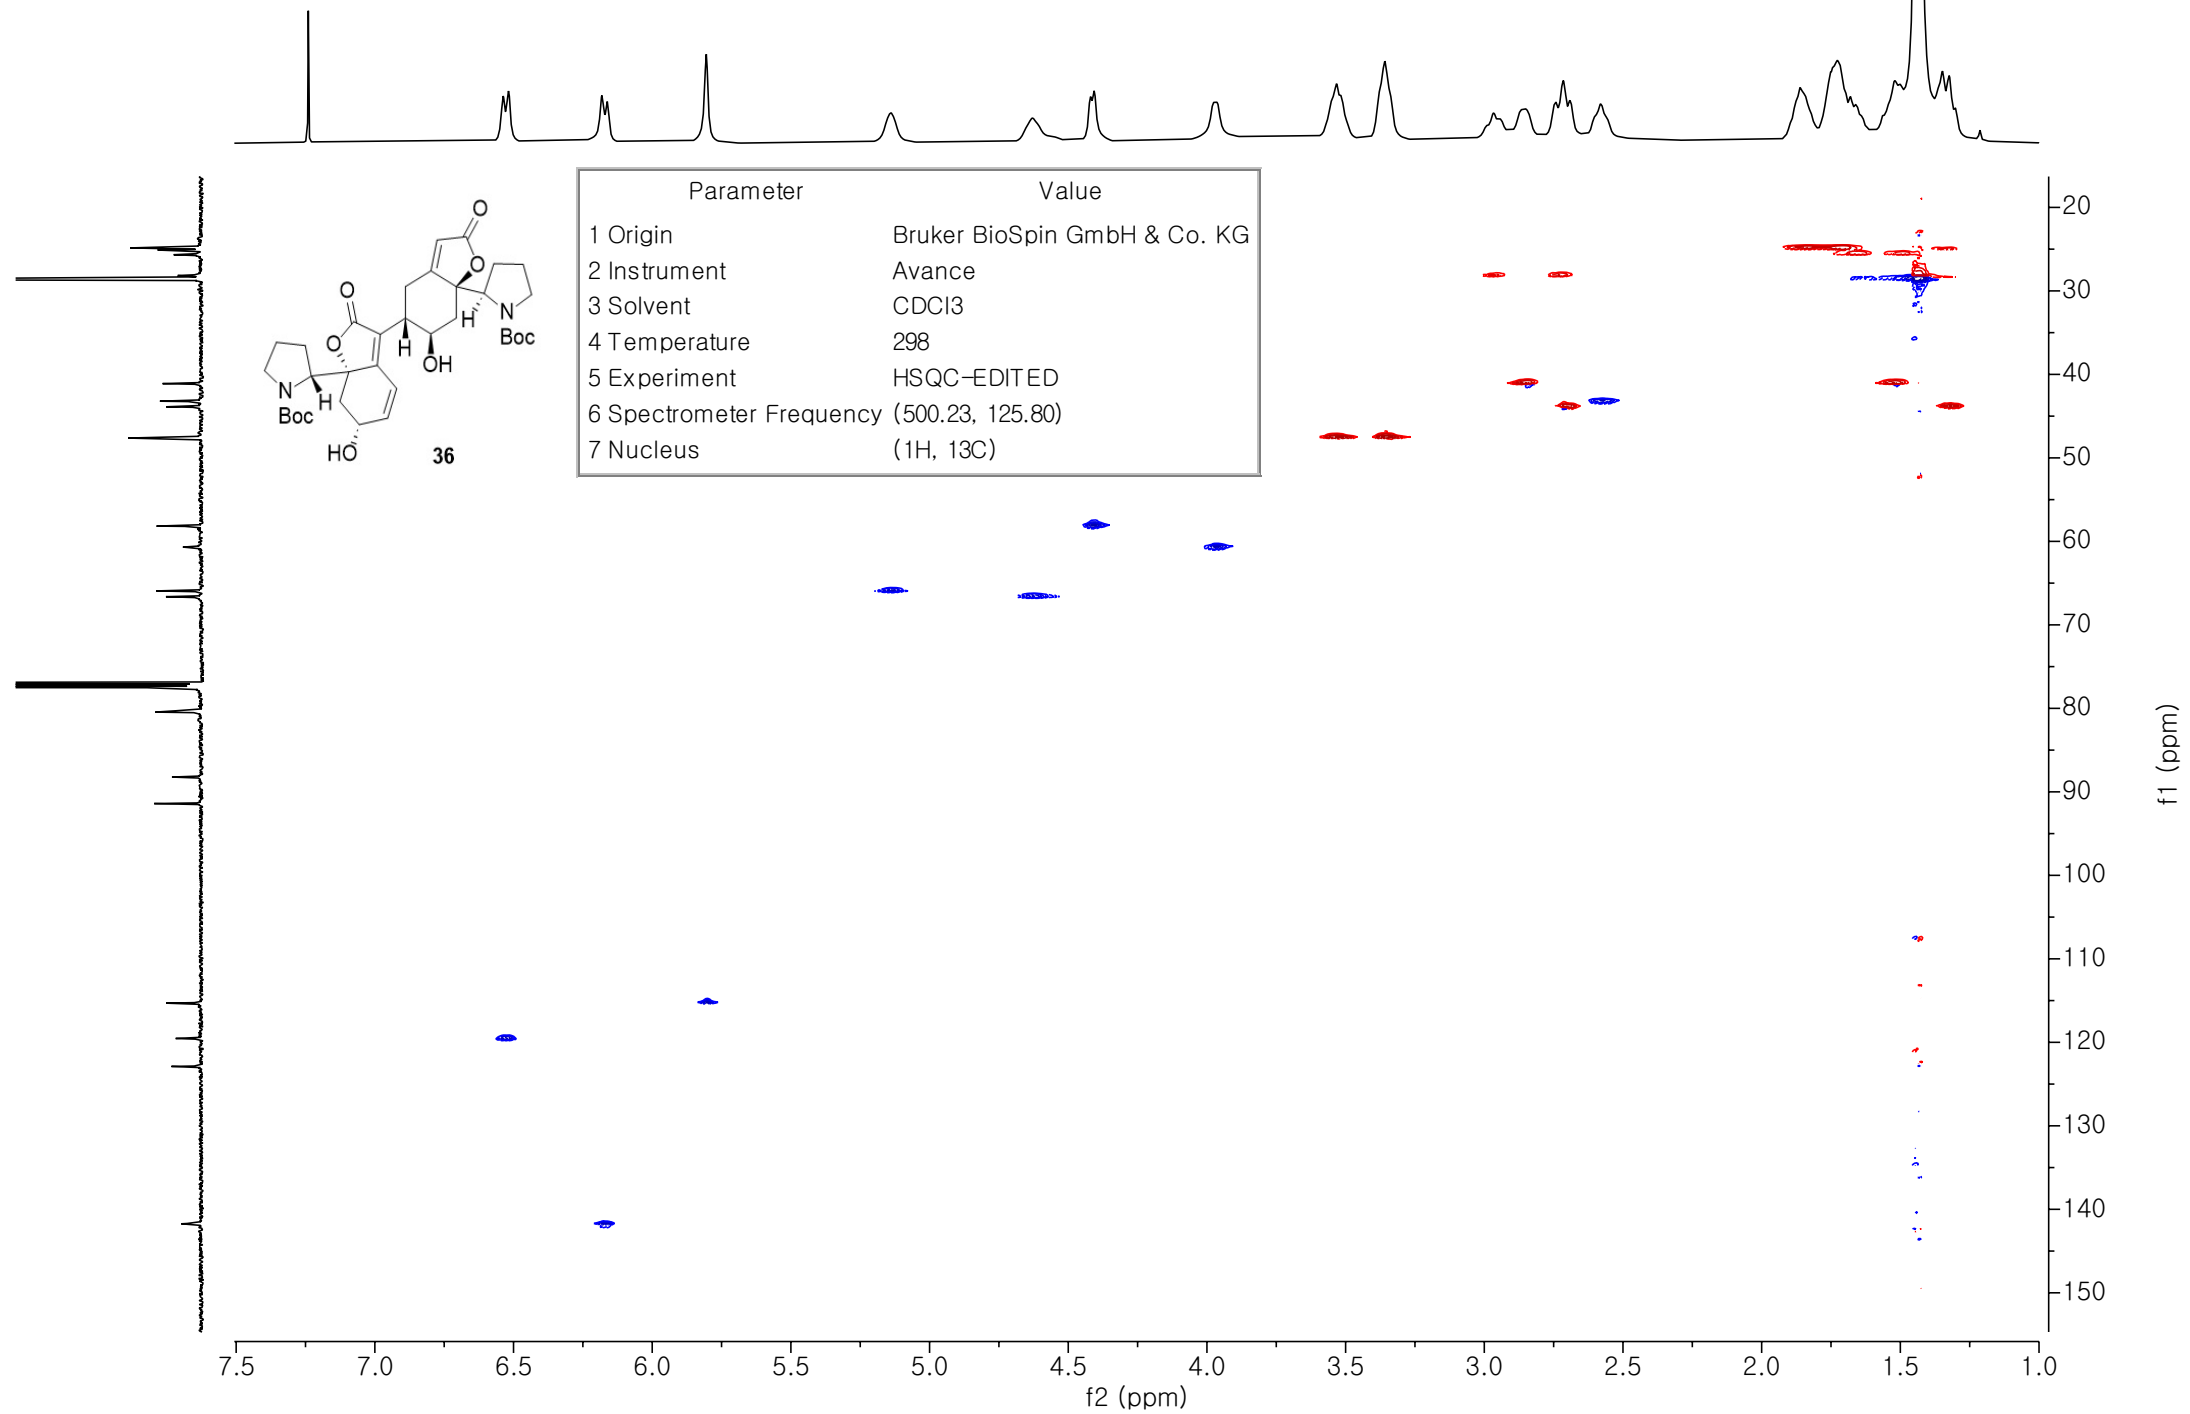

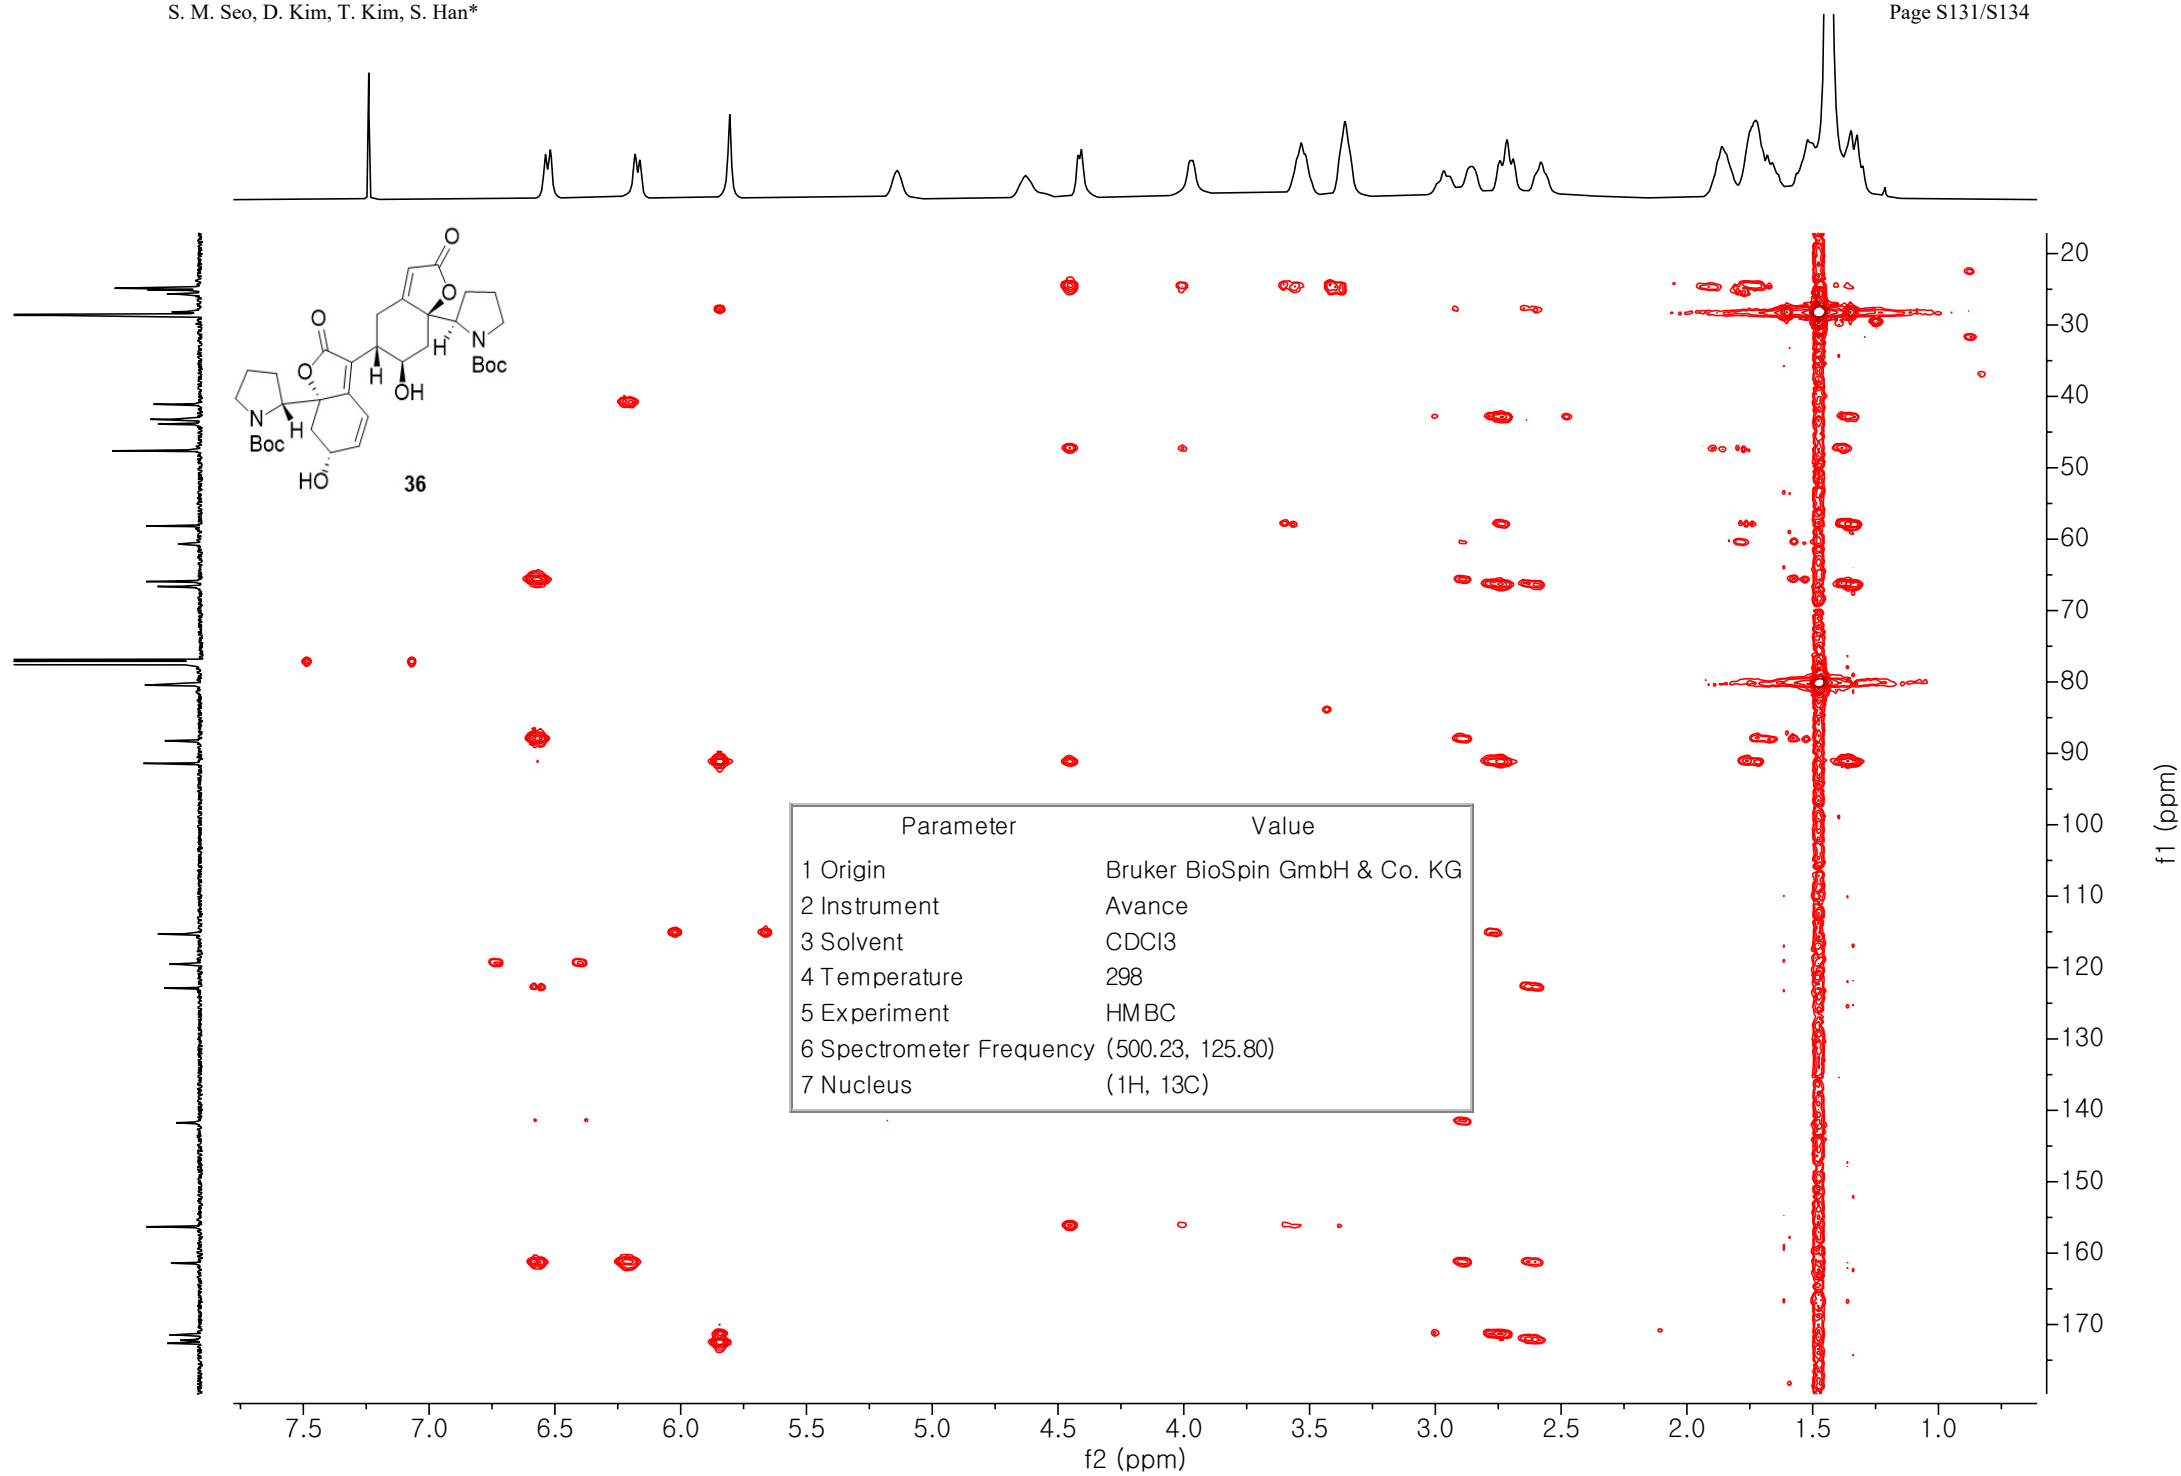

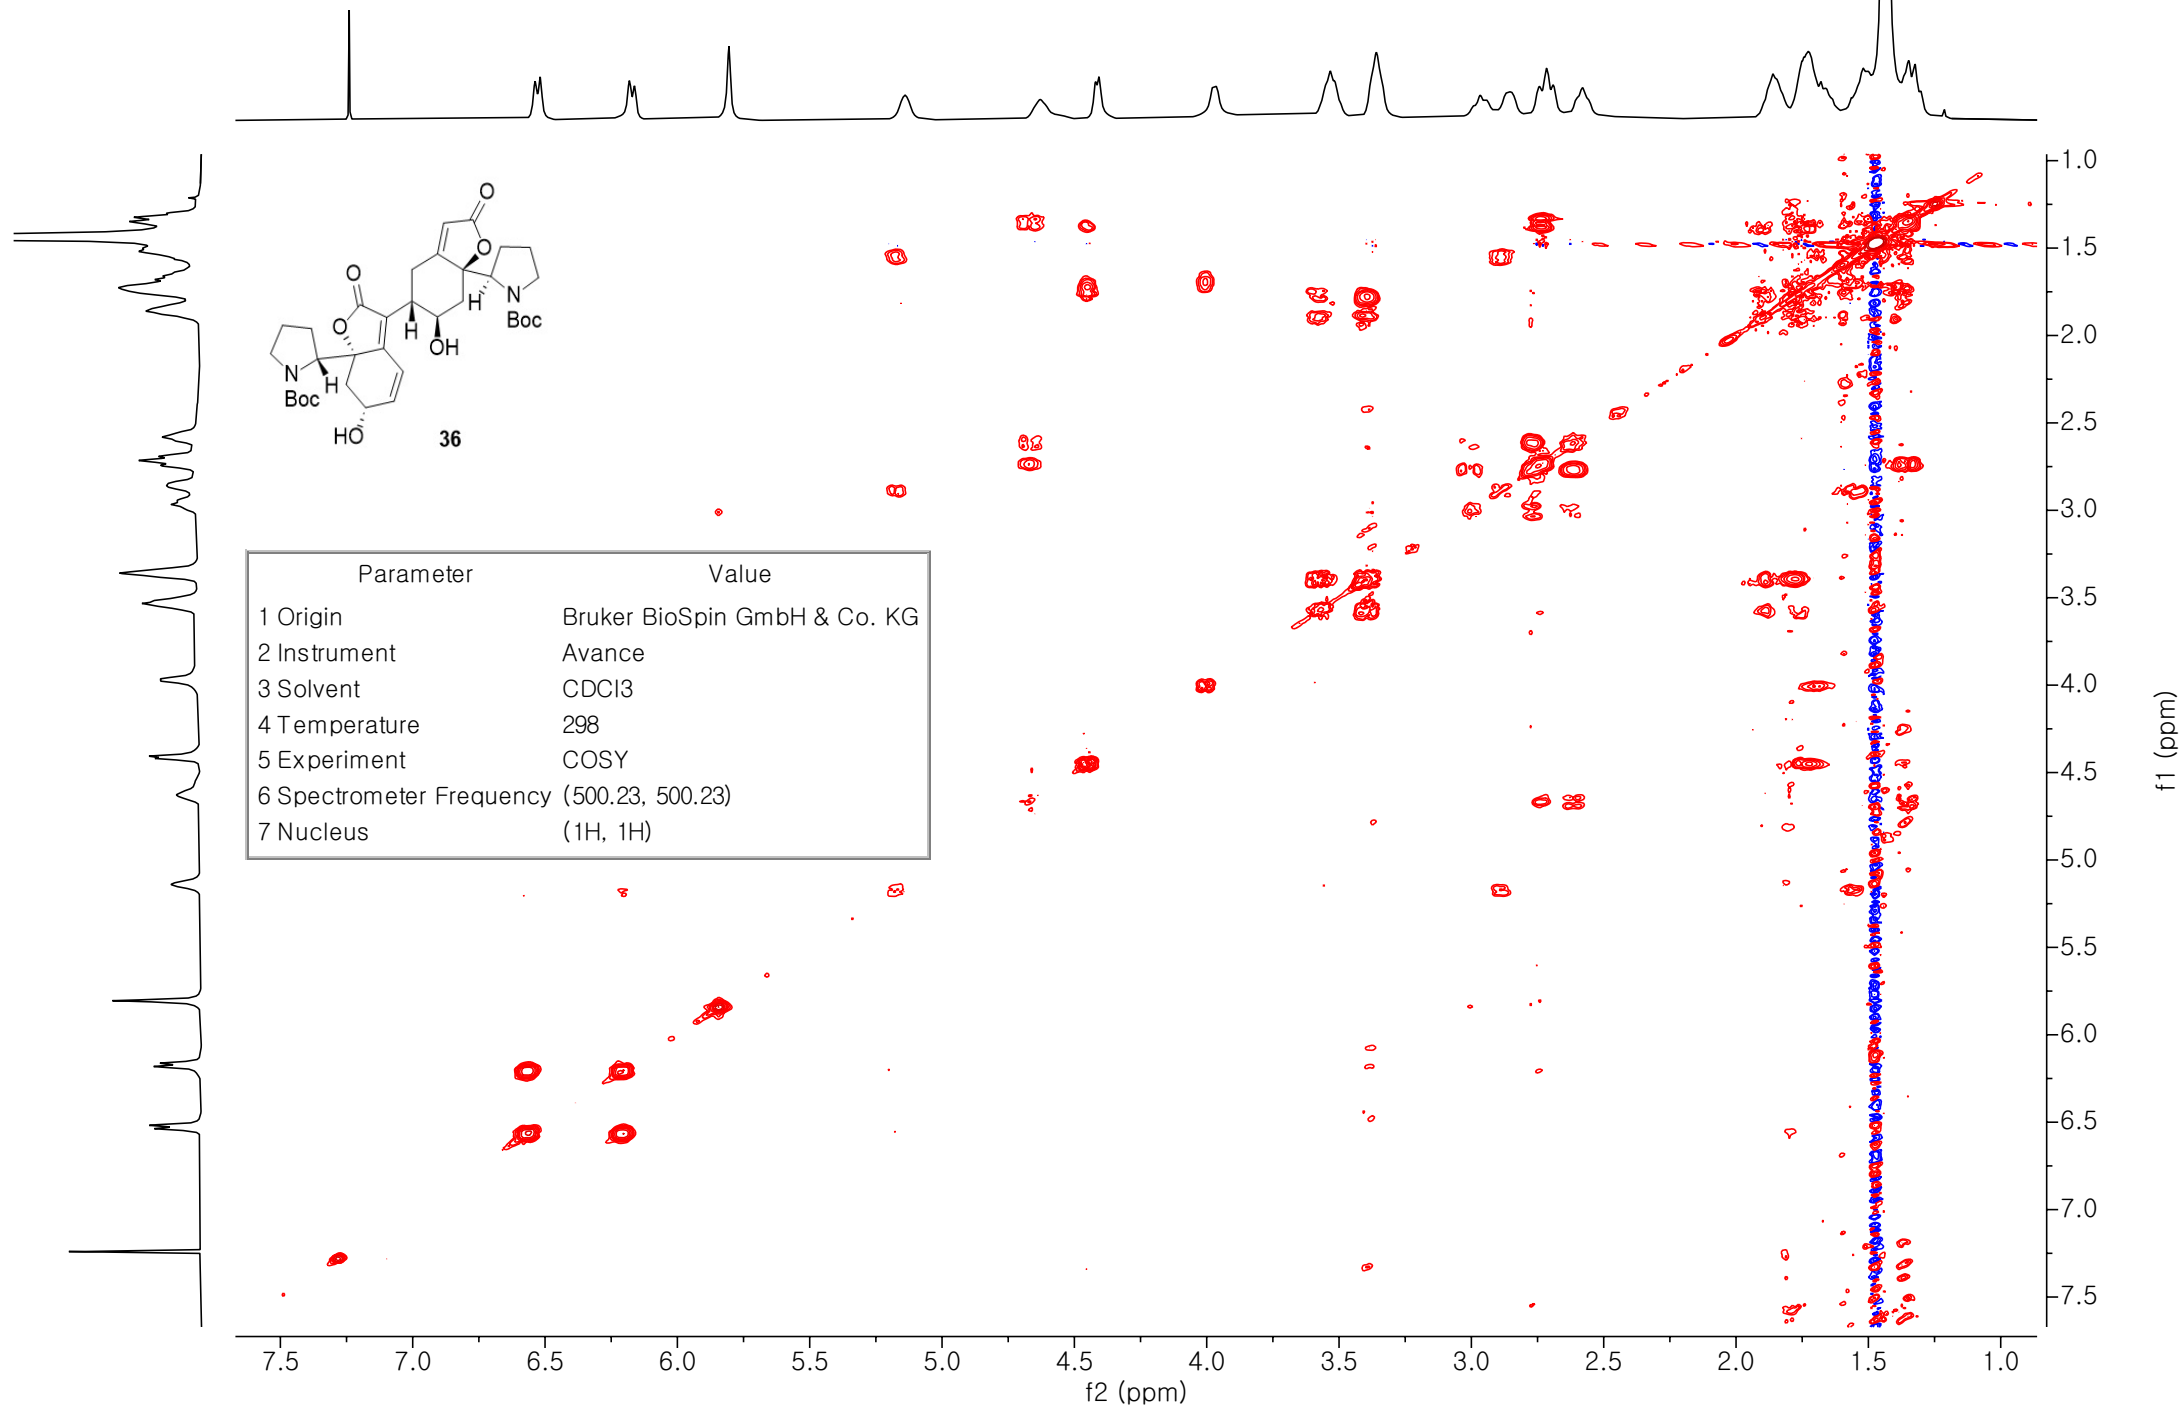

7.24 CDCl<sub>3</sub>

7.12  
7.10

6.68  
6.66  
6.64  
5.62  
5.61  
3.62  
3.61  
3.29  
3.18  
3.16  
3.15  
3.14  
3.13  
2.99  
2.98  
2.97  
2.95  
2.94  
2.92  
2.90  
2.90  
2.89  
2.89  
2.82  
2.82  
2.80  
2.58  
2.57  
2.56  
2.55  
2.54  
2.53  
2.53  
2.52  
1.99  
1.98  
1.97  
1.96  
1.91  
1.90  
1.89  
1.88  
1.88  
1.87  
1.87  
1.86  
1.85  
1.84  
1.79  
1.78  
1.78  
1.77  
1.77  
1.76  
1.76  
1.75  
1.75  
1.74  
1.73  
1.70  
1.67  
1.66  
1.65  
1.64  
1.63  
1.62  
1.61  
1.61  
1.60  
1.52  
1.50

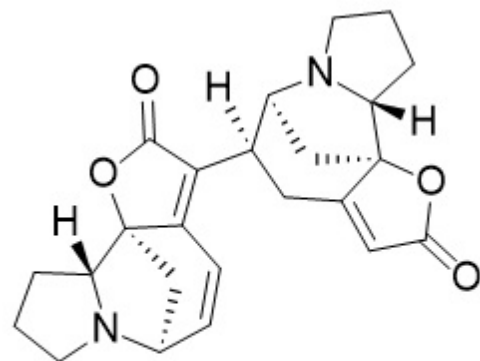

15'-*epi*-flueggein D (7)

| Parameter                | Value                        |
|--------------------------|------------------------------|
| 1 Origin                 | Bruker BioSpin GmbH & Co. KG |
| 2 Instrument             | Avance                       |
| 3 Solvent                | CDCl <sub>3</sub>            |
| 4 Temperature            | 298.0                        |
| 5 Experiment             | 1D                           |
| 6 Spectrometer Frequency | 500.23                       |
| 7 Nucleus                | <sup>1</sup> H               |

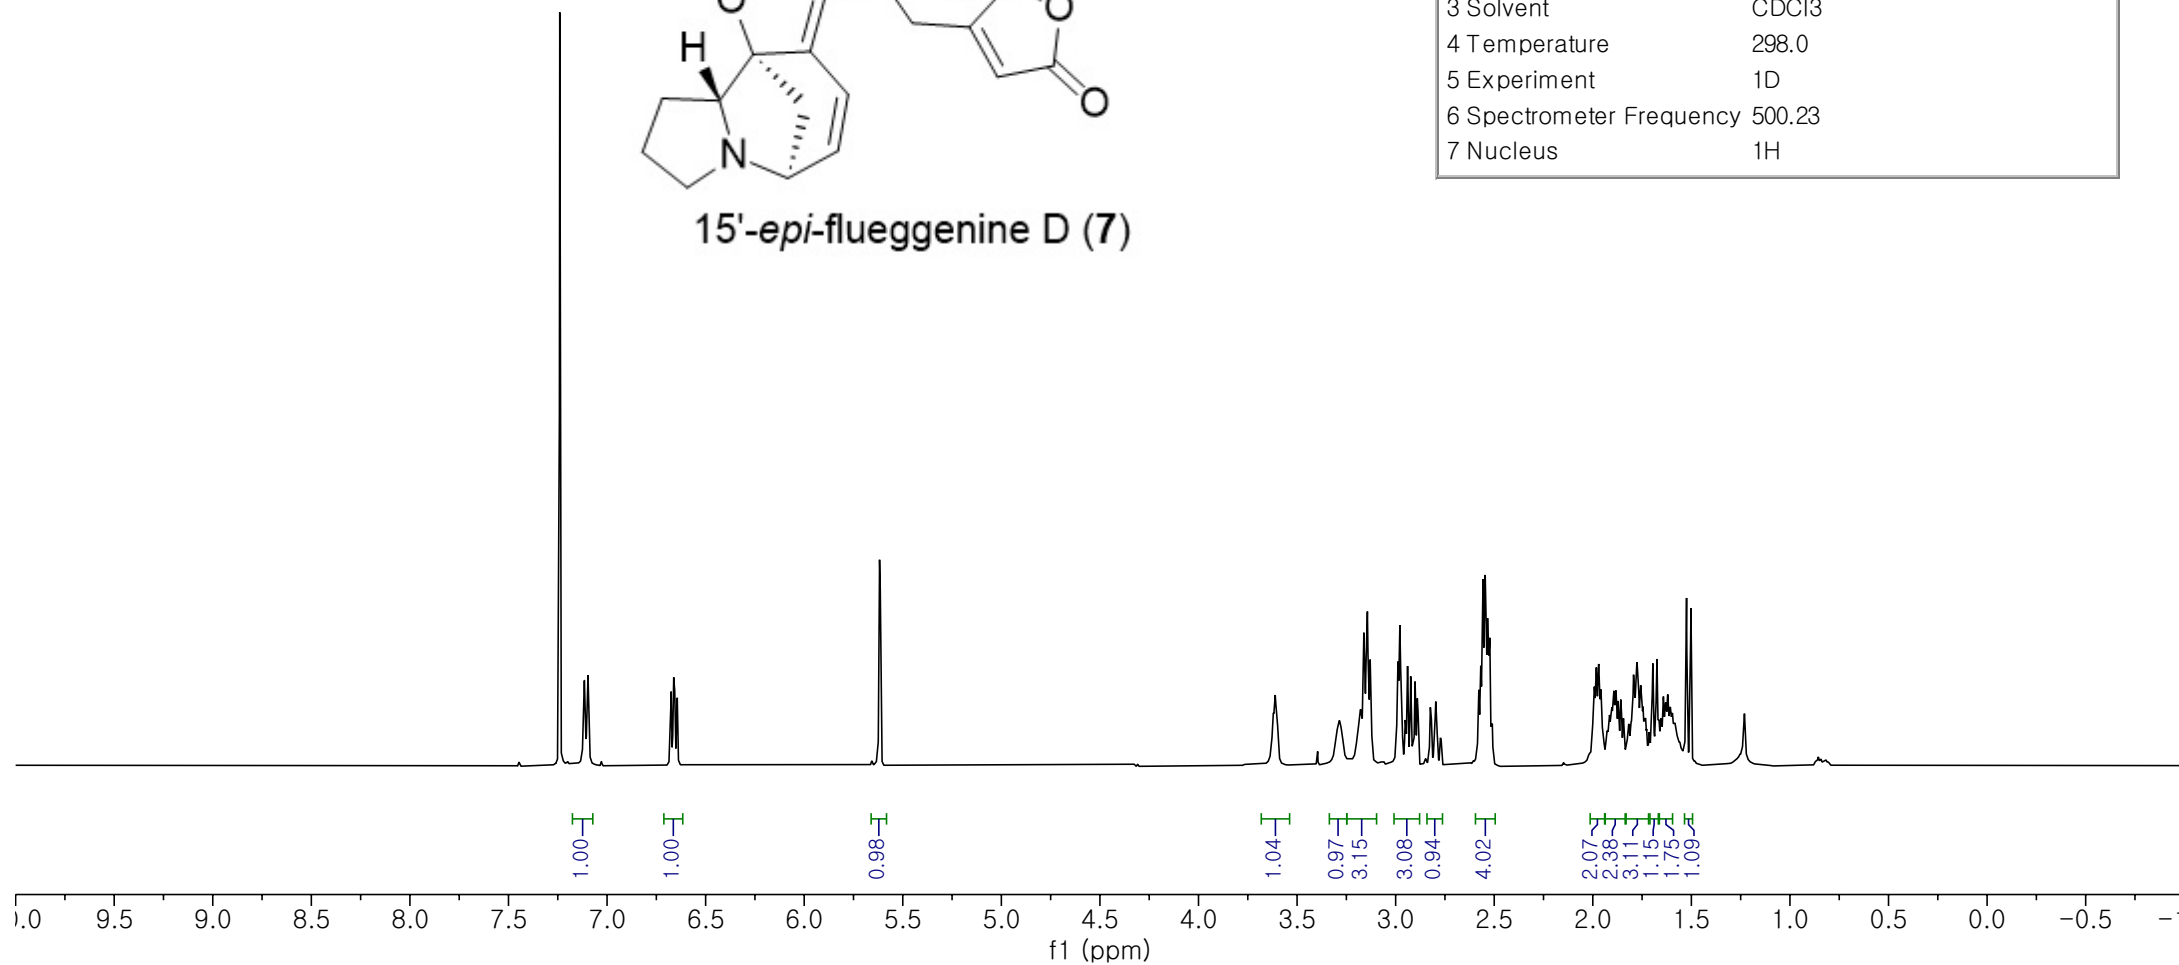

173.9  
173.1  
172.9

163.2

142.6

122.4  
120.4

110.3

92.0  
90.7

77.5 CDCl<sub>3</sub>  
77.0 CDCl<sub>3</sub>  
77.0 CDCl<sub>3</sub>

67.3  
65.9  
65.8

59.9  
57.4  
55.3

39.4  
38.0  
35.7  
29.6  
29.1  
28.7  
27.0  
26.9

| Parameter                | Value                        |
|--------------------------|------------------------------|
| 1 Origin                 | Bruker BioSpin GmbH & Co. KG |
| 2 Instrument             | Avance                       |
| 3 Solvent                | CDCl <sub>3</sub>            |
| 4 Temperature            | 298.3                        |
| 5 Experiment             | 1D                           |
| 6 Spectrometer Frequency | 125.80                       |
| 7 Nucleus                | 13C                          |

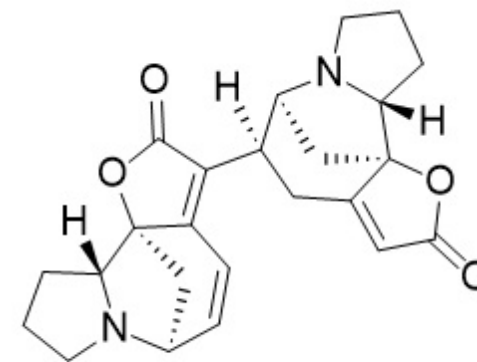

15'-*epi*-flueggein D (7)

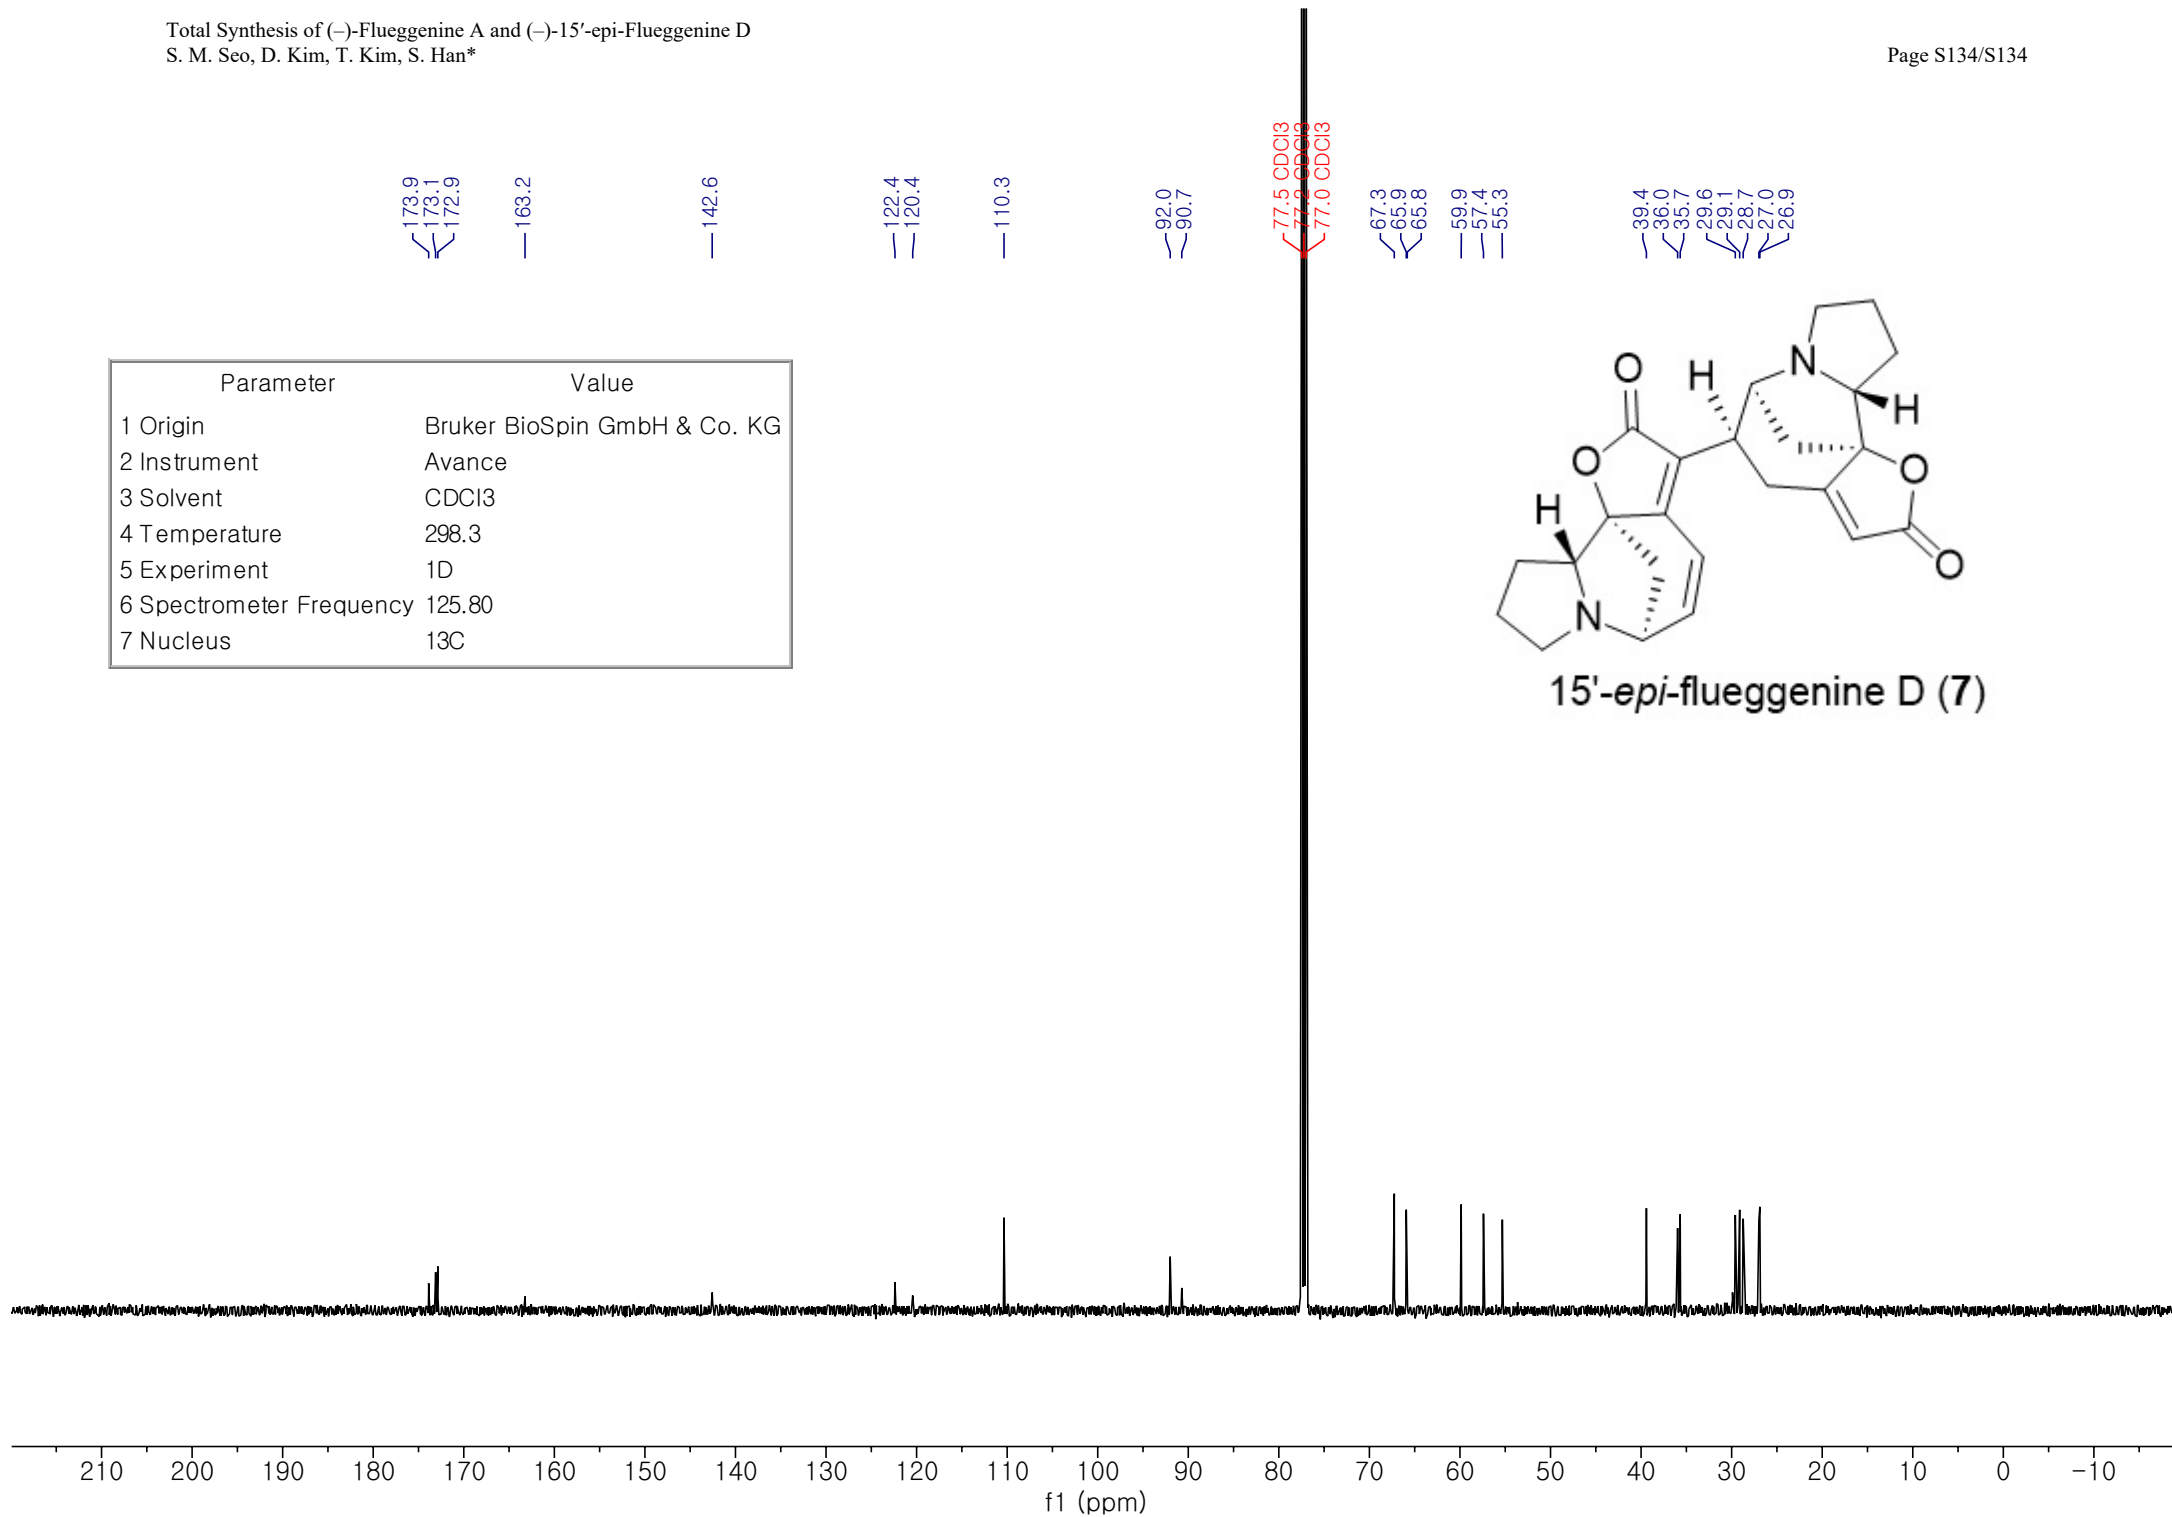

Supplement: d4sc07525k1.pdf [file d4sc07525k1.pdf]
